# Supplementary material for: Transcriptome analysis reveals the mechanism of stromal cell-derived factor-1 and exendin-4 synergistically promoted periodontal ligament stem cells osteogenic differentiation
Source: PeerJ. 2021 Aug 27;9:e12091. doi: 10.7717/peerj.12091 (PMC8404574; doi:10.7717/peerj.12091)
Supplement: Supplemental Information 7 — GO and KEGG functional enrichment analysis results based on DEGs in SDF-1 vs NC, EX-4 vs NC, SDF-1+EX-4 vs NC, SDF-1+EX-4 vs EX-4, SDF-1+EX-4 vs SDF-1, and EX-4 vs SDF-1. Related to Fig. 2 and Fig. S2. [file peerj-09-12091-s007.xlsx]

## Sheet: SDF-1 vs NC_GO
GO_ID	GO_Term	GO_function	GO_class	Genes	S gene number	TS gene number	B gene number	TB gene number	pvalue
GO:0045604	regulation of epidermal cell differentiation	biological_process	8	ENSG00000118263;ENSG00000197063	2	93	4	17212	0.000172075
GO:0060430	lung saccule development	biological_process	5	ENSG00000118260;ENSG00000171456	2	93	5	17212	0.000285782
GO:0034128	negative regulation of MyD88-independent toll-like receptor signaling pathway	biological_process	8	ENSG00000243414;ENSG00000004139	2	93	7	17212	0.000595924
GO:0035613	RNA stem-loop binding	molecular_function	7	ENSG00000127804;ENSG00000135870	2	93	13	17212	0.00216716
GO:0061052	negative regulation of cell growth involved in cardiac muscle cell development	biological_process	11	ENSG00000117152;ENSG00000186951	2	93	13	17212	0.00216716
GO:0061157	mRNA destabilization	biological_process	11	ENSG00000127804;ENSG00000140718	2	93	14	17212	0.00251948
GO:0060348	bone development	biological_process	6	ENSG00000170776;ENSG00000114439;ENSG00000171456	3	93	57	17212	0.00361861
GO:0070266	necroptotic process	biological_process	7	ENSG00000110330;ENSG00000243414	2	93	20	17212	0.00515081
GO:0002756	MyD88-independent toll-like receptor signaling pathway	biological_process	9	ENSG00000110330;ENSG00000243414	2	93	20	17212	0.00515081
GO:0102704	GDP-Man:Man2GlcNAc2-PP-dolichol alpha-1,6-mannosyltransferase activity	molecular_function	7	ENSG00000119523	1	93	1	17212	0.00540321
GO:0030629	U6 snRNA 3'-end binding	molecular_function	9	ENSG00000127804	1	93	1	17212	0.00540321
GO:1902443	negative regulation of ripoptosome assembly involved in necroptotic process	biological_process	8	ENSG00000110330	1	93	1	17212	0.00540321
GO:0035863	dITP catabolic process	biological_process	12	ENSG00000198585	1	93	1	17212	0.00540321
GO:0051723	protein methylesterase activity	molecular_function	7	ENSG00000214517	1	93	1	17212	0.00540321
GO:0045623	negative regulation of T-helper cell differentiation	biological_process	8	ENSG00000135870	1	93	1	17212	0.00540321
GO:0120048	U6 snRNA (adenine-(43)-N(6))-methyltransferase activity	molecular_function	8	ENSG00000127804	1	93	1	17212	0.00540321
GO:1901641	ITP binding	molecular_function	8	ENSG00000198585	1	93	1	17212	0.00540321
GO:1901640	XTP binding	molecular_function	8	ENSG00000198585	1	93	1	17212	0.00540321
GO:0018009	N-terminal peptidyl-L-cysteine N-palmitoylation	biological_process	12	ENSG00000180834	1	93	1	17212	0.00540321
GO:1900148	negative regulation of Schwann cell migration	biological_process	12	ENSG00000143418	1	93	1	17212	0.00540321
GO:0052907	23S rRNA (adenine(1618)-N(6))-methyltransferase activity	molecular_function	9	ENSG00000127804	1	93	1	17212	0.00540321
GO:0051998	protein carboxyl O-methyltransferase activity	molecular_function	8	ENSG00000146476	1	93	1	17212	0.00540321
GO:0120049	snRNA (adenine-N6)-methylation	biological_process	11	ENSG00000127804	1	93	1	17212	0.00540321
GO:0004378	GDP-Man:Man1GlcNAc2-PP-Dol alpha-1,3-mannosyltransferase activity	molecular_function	9	ENSG00000119523	1	93	1	17212	0.00540321
GO:1902912	pyruvate kinase complex	cellular_component	7	ENSG00000067225	1	93	1	17212	0.00540321
GO:0060251	regulation of glial cell proliferation	biological_process	10	ENSG00000118260	1	93	1	17212	0.00540321
GO:0016077	snoRNA catabolic process	biological_process	11	ENSG00000198585	1	93	1	17212	0.00540321
GO:2000494	positive regulation of interleukin-18-mediated signaling pathway	biological_process	10	ENSG00000243414	1	93	1	17212	0.00540321
GO:1900169	regulation of glucocorticoid mediated signaling pathway	biological_process	8	ENSG00000170776	1	93	1	17212	0.00540321
GO:0033577	protein glycosylation in endoplasmic reticulum	biological_process	10	ENSG00000119523	1	93	1	17212	0.00540321
GO:2000103	positive regulation of mammary stem cell proliferation	biological_process	8	ENSG00000213626	1	93	1	17212	0.00540321
GO:0051722	protein C-terminal methylesterase activity	molecular_function	8	ENSG00000214517	1	93	1	17212	0.00540321
GO:1904178	negative regulation of adipose tissue development	biological_process	7	ENSG00000118263	1	93	1	17212	0.00540321
GO:1901639	XDP catabolic process	biological_process	12	ENSG00000198585	1	93	1	17212	0.00540321
GO:0072366	regulation of cellular ketone metabolic process by positive regulation of transcription from RNA polymerase II promoter	biological_process	11	ENSG00000186951	1	93	1	17212	0.00540321
GO:0015172	acidic amino acid transmembrane transporter activity	molecular_function	8	ENSG00000079215	1	93	1	17212	0.00540321
GO:1905045	negative regulation of Schwann cell proliferation involved in axon regeneration	biological_process	13	ENSG00000143418	1	93	1	17212	0.00540321
GO:1904677	positive regulation of somatic stem cell division	biological_process	8	ENSG00000213626	1	93	1	17212	0.00540321
GO:0070350	regulation of white fat cell proliferation	biological_process	8	ENSG00000140718	1	93	1	17212	0.00540321
GO:0034670	chemotaxis to arachidonic acid	biological_process	6	ENSG00000118260	1	93	1	17212	0.00540321
GO:0006402	mRNA catabolic process	biological_process	10	ENSG00000198585;ENSG00000127804	2	93	22	17212	0.00621856
GO:0010608	posttranscriptional regulation of gene expression	biological_process	8	ENSG00000135870;ENSG00000127804	2	93	24	17212	0.00737811
GO:0031214	biomineral tissue development	biological_process	6	ENSG00000162733;ENSG00000106819	2	93	26	17212	0.0086274
GO:0035025	positive regulation of Rho protein signal transduction	biological_process	12	ENSG00000139679;ENSG00000170776	2	93	26	17212	0.0086274
GO:2000463	positive regulation of excitatory postsynaptic potential	biological_process	9	ENSG00000117152;ENSG00000260272	2	93	26	17212	0.0086274
GO:0035666	TRIF-dependent toll-like receptor signaling pathway	biological_process	10	ENSG00000110330;ENSG00000243414	2	93	28	17212	0.00996441
GO:1990931	RNA N6-methyladenosine dioxygenase activity	molecular_function	6	ENSG00000140718	1	93	2	17212	0.0107775
GO:0098770	FBXO family protein binding	molecular_function	5	ENSG00000110330	1	93	2	17212	0.0107775
GO:0001734	mRNA (N6-adenosine)-methyltransferase activity	molecular_function	9	ENSG00000127804	1	93	2	17212	0.0107775
GO:0035669	TRAM-dependent toll-like receptor 4 signaling pathway	biological_process	10	ENSG00000243414	1	93	2	17212	0.0107775
GO:0004743	pyruvate kinase activity	molecular_function	7	ENSG00000067225	1	93	2	17212	0.0107775
GO:0033363	secretory granule organization	biological_process	7	ENSG00000118260	1	93	2	17212	0.0107775
GO:0035516	oxidative DNA demethylase activity	molecular_function	5	ENSG00000140718	1	93	2	17212	0.0107775
GO:0046619	optic placode formation involved in camera-type eye formation	biological_process	7	ENSG00000166225	1	93	2	17212	0.0107775
GO:0048534	hematopoietic or lymphoid organ development	biological_process	6	ENSG00000171456	1	93	2	17212	0.0107775
GO:0038098	sequestering of BMP from receptor via BMP binding	biological_process	12	ENSG00000158747	1	93	2	17212	0.0107775
GO:2000233	negative regulation of rRNA processing	biological_process	9	ENSG00000198585	1	93	2	17212	0.0107775
GO:0140009	L-aspartate import across plasma membrane	biological_process	7	ENSG00000079215	1	93	2	17212	0.0107775
GO:1990589	ATF4-CREB1 transcription factor complex	cellular_component	7	ENSG00000118260	1	93	2	17212	0.0107775
GO:0002635	negative regulation of germinal center formation	biological_process	10	ENSG00000135870	1	93	2	17212	0.0107775
GO:0086023	adenylate cyclase-activating adrenergic receptor signaling pathway involved in heart process	biological_process	10	ENSG00000170776	1	93	2	17212	0.0107775
GO:0110053	regulation of actin filament organization	biological_process	8	ENSG00000117152	1	93	2	17212	0.0107775
GO:1904674	positive regulation of somatic stem cell population maintenance	biological_process	8	ENSG00000213626	1	93	2	17212	0.0107775
GO:0035870	dITP diphosphatase activity	molecular_function	9	ENSG00000198585	1	93	2	17212	0.0107775
GO:0048069	eye pigmentation	biological_process	5	ENSG00000182220	1	93	2	17212	0.0107775
GO:0070889	platelet alpha granule organization	biological_process	8	ENSG00000184056	1	93	2	17212	0.0107775
GO:0060297	regulation of sarcomere organization	biological_process	7	ENSG00000170776	1	93	2	17212	0.0107775
GO:1902524	positive regulation of protein K48-linked ubiquitination	biological_process	13	ENSG00000110330	1	93	2	17212	0.0107775
GO:0072369	regulation of lipid transport by positive regulation of transcription from RNA polymerase II promoter	biological_process	11	ENSG00000186951	1	93	2	17212	0.0107775
GO:0035552	oxidative single-stranded DNA demethylation	biological_process	7	ENSG00000140718	1	93	2	17212	0.0107775
GO:0046709	IDP catabolic process	biological_process	12	ENSG00000198585	1	93	2	17212	0.0107775
GO:0021903	rostrocaudal neural tube patterning	biological_process	7	ENSG00000182220	1	93	2	17212	0.0107775
GO:0090068	positive regulation of cell cycle process	biological_process	8	ENSG00000198585	1	93	2	17212	0.0107775
GO:0033484	nitric oxide homeostasis	biological_process	8	ENSG00000101126	1	93	2	17212	0.0107775
GO:1900924	negative regulation of glycine import across plasma membrane	biological_process	8	ENSG00000117152	1	93	2	17212	0.0107775
GO:0042245	RNA repair	biological_process	9	ENSG00000140718	1	93	2	17212	0.0107775
GO:1990984	tRNA demethylase activity	molecular_function	6	ENSG00000140718	1	93	2	17212	0.0107775
GO:0072363	regulation of glycolytic process by positive regulation of transcription from RNA polymerase II promoter	biological_process	11	ENSG00000186951	1	93	2	17212	0.0107775
GO:1990174	phosphodiesterase decapping endonuclease activity	molecular_function	10	ENSG00000198585	1	93	2	17212	0.0107775
GO:0014870	response to muscle inactivity	biological_process	5	ENSG00000067225	1	93	2	17212	0.0107775
GO:0032427	GBD domain binding	molecular_function	6	ENSG00000119729	1	93	2	17212	0.0107775
GO:0038062	protein tyrosine kinase collagen receptor activity	molecular_function	10	ENSG00000162733	1	93	2	17212	0.0107775
GO:0055025	positive regulation of cardiac muscle tissue development	biological_process	10	ENSG00000118260	1	93	2	17212	0.0107775
GO:0070171	negative regulation of tooth mineralization	biological_process	10	ENSG00000106819	1	93	2	17212	0.0107775
GO:0005164	tumor necrosis factor receptor binding	molecular_function	8	ENSG00000239697;ENSG00000248871	2	93	31	17212	0.01213
GO:0001666	response to hypoxia	biological_process	5	ENSG00000067225;ENSG00000118260;ENSG00000110330;ENSG00000186951	4	93	165	17212	0.0122867
GO:0002088	lens development in camera-type eye	biological_process	5	ENSG00000177045;ENSG00000166225	2	93	32	17212	0.0128936
GO:0030879	mammary gland development	biological_process	7	ENSG00000213626;ENSG00000118260	2	93	33	17212	0.0136777
GO:0032485	regulation of Ral protein signal transduction	biological_process	11	ENSG00000116191	1	93	3	17212	0.0161231
GO:0016513	core-binding factor complex	cellular_component	7	ENSG00000067955	1	93	3	17212	0.0161231
GO:0051938	L-glutamate import	biological_process	11	ENSG00000079215	1	93	3	17212	0.0161231
GO:1902523	positive regulation of protein K63-linked ubiquitination	biological_process	13	ENSG00000110330	1	93	3	17212	0.0161231
GO:2000116	regulation of cysteine-type endopeptidase activity	biological_process	11	ENSG00000110330	1	93	3	17212	0.0161231
GO:0044065	regulation of respiratory system process	biological_process	7	ENSG00000140718	1	93	3	17212	0.0161231
GO:0048145	regulation of fibroblast proliferation	biological_process	7	ENSG00000118260	1	93	3	17212	0.0161231
GO:0005314	high-affinity glutamate transmembrane transporter activity	molecular_function	9	ENSG00000079215	1	93	3	17212	0.0161231
GO:0031223	auditory behavior	biological_process	5	ENSG00000079215	1	93	3	17212	0.0161231
GO:0060160	negative regulation of dopamine receptor signaling pathway	biological_process	10	ENSG00000117152	1	93	3	17212	0.0161231
GO:0043734	DNA-N1-methyladenine dioxygenase activity	molecular_function	7	ENSG00000140718	1	93	3	17212	0.0161231
GO:0035553	oxidative single-stranded RNA demethylation	biological_process	11	ENSG00000140718	1	93	3	17212	0.0161231
GO:0035582	sequestering of BMP in extracellular matrix	biological_process	12	ENSG00000158747	1	93	3	17212	0.0161231
GO:0039535	regulation of RIG-I signaling pathway	biological_process	8	ENSG00000110330	1	93	3	17212	0.0161231
GO:1903053	regulation of extracellular matrix organization	biological_process	7	ENSG00000162733	1	93	3	17212	0.0161231
GO:0035359	negative regulation of peroxisome proliferator activated receptor signaling pathway	biological_process	9	ENSG00000171456	1	93	3	17212	0.0161231
GO:0060215	primitive hemopoiesis	biological_process	9	ENSG00000101109	1	93	3	17212	0.0161231
GO:0060800	regulation of cell differentiation involved in embryonic placenta development	biological_process	7	ENSG00000101109	1	93	3	17212	0.0161231
GO:0052856	NADHX epimerase activity	molecular_function	6	ENSG00000258674	1	93	3	17212	0.0161231
GO:0000033	alpha-1,3-mannosyltransferase activity	molecular_function	8	ENSG00000119523	1	93	3	17212	0.0161231
GO:0052857	NADPHX epimerase activity	molecular_function	6	ENSG00000258674	1	93	3	17212	0.0161231
GO:0031315	extrinsic component of mitochondrial outer membrane	cellular_component	6	ENSG00000004139	1	93	3	17212	0.0161231
GO:0010871	negative regulation of receptor biosynthetic process	biological_process	9	ENSG00000186951	1	93	3	17212	0.0161231
GO:0001225	RNA polymerase II transcription coactivator binding	molecular_function	8	ENSG00000118260	1	93	3	17212	0.0161231
GO:0032916	positive regulation of transforming growth factor beta3 production	biological_process	9	ENSG00000118260	1	93	3	17212	0.0161231
GO:0009449	gamma-aminobutyric acid biosynthetic process	biological_process	10	ENSG00000079215	1	93	3	17212	0.0161231
GO:0070424	regulation of nucleotide-binding oligomerization domain containing signaling pathway	biological_process	8	ENSG00000110330	1	93	3	17212	0.0161231
GO:0015501	glutamate:sodium symporter activity	molecular_function	8	ENSG00000079215	1	93	3	17212	0.0161231
GO:0035515	oxidative RNA demethylase activity	molecular_function	5	ENSG00000140718	1	93	3	17212	0.0161231
GO:0048487	beta-tubulin binding	molecular_function	7	ENSG00000101126;ENSG00000139112	2	93	38	17212	0.0178965
GO:0007032	endosome organization	biological_process	7	ENSG00000184056;ENSG00000111540	2	93	38	17212	0.0178965
GO:1990791	dorsal root ganglion development	biological_process	7	ENSG00000117152	1	93	4	17212	0.0214401
GO:1902723	negative regulation of skeletal muscle satellite cell proliferation	biological_process	9	ENSG00000177045	1	93	4	17212	0.0214401
GO:0019211	phosphatase activator activity	molecular_function	6	ENSG00000166225	1	93	4	17212	0.0214401
GO:0043378	positive regulation of CD8-positive, alpha-beta T cell differentiation	biological_process	12	ENSG00000067955	1	93	4	17212	0.0214401
GO:0006490	oligosaccharide-lipid intermediate biosynthetic process	biological_process	7	ENSG00000119523	1	93	4	17212	0.0214401
GO:0061470	T follicular helper cell differentiation	biological_process	13	ENSG00000135870	1	93	4	17212	0.0214401
GO:0098519	nucleotide phosphatase activity, acting on free nucleotides	molecular_function	8	ENSG00000198585	1	93	4	17212	0.0214401
GO:0006556	S-adenosylmethionine biosynthetic process	biological_process	8	ENSG00000127804	1	93	4	17212	0.0214401
GO:0035522	monoubiquitinated histone H2A deubiquitination	biological_process	12	ENSG00000171456	1	93	4	17212	0.0214401
GO:0051525	NFAT protein binding	molecular_function	8	ENSG00000186951	1	93	4	17212	0.0214401
GO:0021545	cranial nerve development	biological_process	6	ENSG00000079215	1	93	4	17212	0.0214401
GO:0050897	cobalt ion binding	molecular_function	8	ENSG00000198585	1	93	4	17212	0.0214401
GO:0048386	positive regulation of retinoic acid receptor signaling pathway	biological_process	9	ENSG00000171456	1	93	4	17212	0.0214401
GO:0072594	establishment of protein localization to organelle	biological_process	8	ENSG00000048140	1	93	4	17212	0.0214401
GO:2000628	regulation of miRNA metabolic process	biological_process	9	ENSG00000135870	1	93	4	17212	0.0214401
GO:0048263	determination of dorsal identity	biological_process	7	ENSG00000158747	1	93	4	17212	0.0214401
GO:0003157	endocardium development	biological_process	5	ENSG00000101109	1	93	4	17212	0.0214401
GO:0043371	negative regulation of CD4-positive, alpha-beta T cell differentiation	biological_process	12	ENSG00000067955	1	93	4	17212	0.0214401
GO:0070779	D-aspartate import across plasma membrane	biological_process	13	ENSG00000079215	1	93	4	17212	0.0214401
GO:0035517	PR-DUB complex	cellular_component	5	ENSG00000171456	1	93	4	17212	0.0214401
GO:0055037	recycling endosome	cellular_component	8	ENSG00000058063;ENSG00000143147;ENSG00000184056	3	93	118	17212	0.0260933
GO:0006482	protein demethylation	biological_process	10	ENSG00000214517	1	93	5	17212	0.0267287
GO:0090335	regulation of brown fat cell differentiation	biological_process	8	ENSG00000140718	1	93	5	17212	0.0267287
GO:0010883	regulation of lipid storage	biological_process	5	ENSG00000140718	1	93	5	17212	0.0267287
GO:0098712	L-glutamate import across plasma membrane	biological_process	7	ENSG00000079215	1	93	5	17212	0.0267287
GO:1902527	positive regulation of protein monoubiquitination	biological_process	12	ENSG00000110330	1	93	5	17212	0.0267287
GO:0006382	adenosine to inosine editing	biological_process	11	ENSG00000198585	1	93	5	17212	0.0267287
GO:0033106	cis-Golgi network membrane	cellular_component	7	ENSG00000173626	1	93	5	17212	0.0267287
GO:0002634	regulation of germinal center formation	biological_process	9	ENSG00000135870	1	93	5	17212	0.0267287
GO:0010891	negative regulation of sequestering of triglyceride	biological_process	7	ENSG00000186951	1	93	5	17212	0.0267287
GO:0015616	DNA translocase activity	molecular_function	12	ENSG00000197275	1	93	5	17212	0.0267287
GO:0060509	type I pneumocyte differentiation	biological_process	8	ENSG00000118260	1	93	5	17212	0.0267287
GO:2000535	regulation of entry of bacterium into host cell	biological_process	7	ENSG00000182473	1	93	5	17212	0.0267287
GO:0018812	3-hydroxyacyl-CoA dehydratase activity	molecular_function	7	ENSG00000255154	1	93	5	17212	0.0267287
GO:0015917	aminophospholipid transport	biological_process	9	ENSG00000058063	1	93	5	17212	0.0267287
GO:0050856	regulation of T cell receptor signaling pathway	biological_process	9	ENSG00000135870	1	93	5	17212	0.0267287
GO:0042866	pyruvate biosynthetic process	biological_process	10	ENSG00000067225	1	93	5	17212	0.0267287
GO:0010715	regulation of extracellular matrix disassembly	biological_process	8	ENSG00000162733	1	93	5	17212	0.0267287
GO:0000287	magnesium ion binding	molecular_function	7	ENSG00000067225;ENSG00000058063;ENSG00000101109;ENSG00000198585	4	93	210	17212	0.0270958
GO:0006865	amino acid transport	biological_process	10	ENSG00000079215;ENSG00000103064	2	93	49	17212	0.0288159
GO:0032400	melanosome localization	biological_process	8	ENSG00000184056	1	93	6	17212	0.031989
GO:1902065	response to L-glutamate	biological_process	8	ENSG00000118260	1	93	6	17212	0.031989
GO:0050291	sphingosine N-acyltransferase activity	molecular_function	8	ENSG00000143418	1	93	6	17212	0.031989
GO:0060527	prostate epithelial cord arborization involved in prostate glandular acinus morphogenesis	biological_process	9	ENSG00000166225	1	93	6	17212	0.031989
GO:0046321	positive regulation of fatty acid oxidation	biological_process	10	ENSG00000186951	1	93	6	17212	0.031989
GO:0030641	regulation of cellular pH	biological_process	11	ENSG00000197063	1	93	6	17212	0.031989
GO:0001504	neurotransmitter uptake	biological_process	6	ENSG00000079215	1	93	6	17212	0.031989
GO:1901621	negative regulation of smoothened signaling pathway involved in dorsal/ventral neural tube patterning	biological_process	10	ENSG00000143147	1	93	6	17212	0.031989
GO:0019212	phosphatase inhibitor activity	molecular_function	6	ENSG00000143401	1	93	6	17212	0.031989
GO:0090027	negative regulation of monocyte chemotaxis	biological_process	9	ENSG00000158747	1	93	6	17212	0.031989
GO:0006537	glutamate biosynthetic process	biological_process	12	ENSG00000079215	1	93	6	17212	0.031989
GO:0007185	transmembrane receptor protein tyrosine phosphatase signaling pathway	biological_process	7	ENSG00000166225	1	93	6	17212	0.031989
GO:0008595	anterior/posterior axis specification, embryo	biological_process	7	ENSG00000166225	1	93	6	17212	0.031989
GO:0004691	cAMP-dependent protein kinase activity	molecular_function	10	ENSG00000170776	1	93	6	17212	0.031989
GO:0032914	positive regulation of transforming growth factor beta1 production	biological_process	9	ENSG00000182220	1	93	6	17212	0.031989
GO:1903038	negative regulation of leukocyte cell-cell adhesion	biological_process	8	ENSG00000186951	1	93	6	17212	0.031989
GO:0070475	rRNA base methylation	biological_process	14	ENSG00000127804	1	93	6	17212	0.031989
GO:0016015	morphogen activity	molecular_function	7	ENSG00000158747	1	93	6	17212	0.031989
GO:1990001	inhibition of cysteine-type endopeptidase activity involved in apoptotic process	biological_process	11	ENSG00000110330	1	93	6	17212	0.031989
GO:0005168	neurotrophin TRKA receptor binding	molecular_function	9	ENSG00000166225	1	93	6	17212	0.031989
GO:0002090	regulation of receptor internalization	biological_process	7	ENSG00000128585	1	93	6	17212	0.031989
GO:0060706	cell differentiation involved in embryonic placenta development	biological_process	5	ENSG00000101109	1	93	6	17212	0.031989
GO:0010835	regulation of protein ADP-ribosylation	biological_process	9	ENSG00000101126	1	93	6	17212	0.031989
GO:0045600	positive regulation of fat cell differentiation	biological_process	8	ENSG00000101109;ENSG00000118260	2	93	53	17212	0.0333013
GO:2000320	negative regulation of T-helper 17 cell differentiation	biological_process	9	ENSG00000135870	1	93	7	17212	0.0372212
GO:1902916	positive regulation of protein polyubiquitination	biological_process	12	ENSG00000110330	1	93	7	17212	0.0372212
GO:0032584	growth cone membrane	cellular_component	5	ENSG00000182473	1	93	7	17212	0.0372212
GO:0070324	thyroid hormone binding	molecular_function	5	ENSG00000067225	1	93	7	17212	0.0372212
GO:0017185	peptidyl-lysine hydroxylation	biological_process	10	ENSG00000184056	1	93	7	17212	0.0372212
GO:0050072	m7G(5')pppN diphosphatase activity	molecular_function	8	ENSG00000198585	1	93	7	17212	0.0372212
GO:0001959	regulation of cytokine-mediated signaling pathway	biological_process	8	ENSG00000067955	1	93	7	17212	0.0372212
GO:0060544	regulation of necroptotic process	biological_process	9	ENSG00000110330	1	93	7	17212	0.0372212
GO:0097371	MDM2/MDM4 family protein binding	molecular_function	5	ENSG00000186951	1	93	7	17212	0.0372212
GO:0070307	lens fiber cell development	biological_process	7	ENSG00000166225	1	93	7	17212	0.0372212
GO:0002115	store-operated calcium entry	biological_process	11	ENSG00000175938	1	93	7	17212	0.0372212
GO:0048539	bone marrow development	biological_process	6	ENSG00000171456	1	93	7	17212	0.0372212
GO:0035095	behavioral response to nicotine	biological_process	5	ENSG00000186951	1	93	7	17212	0.0372212
GO:0032099	negative regulation of appetite	biological_process	11	ENSG00000186951	1	93	7	17212	0.0372212
GO:0007249	I-kappaB kinase/NF-kappaB signaling	biological_process	6	ENSG00000243414;ENSG00000110330	2	93	58	17212	0.039263
GO:1901215	negative regulation of neuron death	biological_process	8	ENSG00000186951;ENSG00000118260	2	93	58	17212	0.039263
GO:0031901	early endosome membrane	cellular_component	9	ENSG00000111540;ENSG00000243414;ENSG00000184056	3	93	139	17212	0.0395208
GO:0051056	regulation of small GTPase mediated signal transduction	biological_process	9	ENSG00000119729;ENSG00000170776;ENSG00000275832	3	93	140	17212	0.0402329
GO:0043408	regulation of MAPK cascade	biological_process	10	ENSG00000213626;ENSG00000182220	2	93	59	17212	0.0405006
GO:0042981	regulation of apoptotic process	biological_process	8	ENSG00000110330;ENSG00000166225;ENSG00000118260;ENSG00000004139	4	93	241	17212	0.0416585
GO:0046887	positive regulation of hormone secretion	biological_process	8	ENSG00000118260	1	93	8	17212	0.0424254
GO:0030098	lymphocyte differentiation	biological_process	7	ENSG00000067955	1	93	8	17212	0.0424254
GO:0006312	mitotic recombination	biological_process	9	ENSG00000197275	1	93	8	17212	0.0424254
GO:0048227	plasma membrane to endosome transport	biological_process	7	ENSG00000111540	1	93	8	17212	0.0424254
GO:0010887	negative regulation of cholesterol storage	biological_process	7	ENSG00000186951	1	93	8	17212	0.0424254
GO:0060428	lung epithelium development	biological_process	7	ENSG00000118260	1	93	8	17212	0.0424254
GO:1990314	cellular response to insulin-like growth factor stimulus	biological_process	8	ENSG00000118260	1	93	8	17212	0.0424254
GO:0045078	positive regulation of interferon-gamma biosynthetic process	biological_process	9	ENSG00000103855	1	93	8	17212	0.0424254
GO:0071439	clathrin complex	cellular_component	6	ENSG00000184056	1	93	8	17212	0.0424254
GO:0005078	MAP-kinase scaffold activity	molecular_function	7	ENSG00000170776	1	93	8	17212	0.0424254
GO:0090091	positive regulation of extracellular matrix disassembly	biological_process	9	ENSG00000162733	1	93	8	17212	0.0424254
GO:0071340	skeletal muscle acetylcholine-gated channel clustering	biological_process	7	ENSG00000157916	1	93	8	17212	0.0424254
GO:0050805	negative regulation of synaptic transmission	biological_process	8	ENSG00000101126	1	93	8	17212	0.0424254
GO:1902083	negative regulation of peptidyl-cysteine S-nitrosylation	biological_process	10	ENSG00000260272	1	93	8	17212	0.0424254
GO:0034121	regulation of toll-like receptor signaling pathway	biological_process	8	ENSG00000110330	1	93	8	17212	0.0424254
GO:0005518	collagen binding	molecular_function	5	ENSG00000106819;ENSG00000162733	2	93	62	17212	0.0443009
GO:0006621	protein retention in ER lumen	biological_process	9	ENSG00000157916	1	93	9	17212	0.0476018
GO:0043486	histone exchange	biological_process	7	ENSG00000143401	1	93	9	17212	0.0476018
GO:0031390	Ctf18 RFC-like complex	cellular_component	4	ENSG00000286140	1	93	9	17212	0.0476018
GO:0032000	positive regulation of fatty acid beta-oxidation	biological_process	9	ENSG00000186951	1	93	9	17212	0.0476018
GO:0018026	peptidyl-lysine monomethylation	biological_process	12	ENSG00000103037	1	93	9	17212	0.0476018
GO:0019217	regulation of fatty acid metabolic process	biological_process	8	ENSG00000186951	1	93	9	17212	0.0476018
GO:0046621	negative regulation of organ growth	biological_process	8	ENSG00000101109	1	93	9	17212	0.0476018
GO:0009629	response to gravity	biological_process	5	ENSG00000067225	1	93	9	17212	0.0476018
GO:0048667	cell morphogenesis involved in neuron differentiation	biological_process	8	ENSG00000079215	1	93	9	17212	0.0476018
GO:0003416	endochondral bone growth	biological_process	6	ENSG00000162733	1	93	9	17212	0.0476018
GO:0071875	adrenergic receptor signaling pathway	biological_process	6	ENSG00000170776	1	93	9	17212	0.0476018
GO:1990763	arrestin family protein binding	molecular_function	5	ENSG00000118260	1	93	9	17212	0.0476018
GO:0042129	regulation of T cell proliferation	biological_process	10	ENSG00000135870	1	93	9	17212	0.0476018
GO:0060323	head morphogenesis	biological_process	5	ENSG00000182220	1	93	9	17212	0.0476018
GO:2000726	negative regulation of cardiac muscle cell differentiation	biological_process	10	ENSG00000166225	1	93	9	17212	0.0476018
GO:0034145	positive regulation of toll-like receptor 4 signaling pathway	biological_process	10	ENSG00000243414	1	93	9	17212	0.0476018
GO:0042752	regulation of circadian rhythm	biological_process	5	ENSG00000186951;ENSG00000118260	2	93	66	17212	0.0495642
GO:0050852	T cell receptor signaling pathway	biological_process	8	ENSG00000111801;ENSG00000135870;ENSG00000103855	3	93	153	17212	0.0500766
GO:0002456	T cell mediated immunity	biological_process	7	ENSG00000111801	1	93	10	17212	0.0527505
GO:0006307	DNA dealkylation involved in DNA repair	biological_process	10	ENSG00000140718	1	93	10	17212	0.0527505
GO:0015279	store-operated calcium channel activity	molecular_function	9	ENSG00000175938	1	93	10	17212	0.0527505
GO:0030957	Tat protein binding	molecular_function	8	ENSG00000139112	1	93	10	17212	0.0527505
GO:0038063	collagen-activated tyrosine kinase receptor signaling pathway	biological_process	8	ENSG00000162733	1	93	10	17212	0.0527505
GO:0036122	BMP binding	molecular_function	6	ENSG00000158747	1	93	10	17212	0.0527505
GO:0030955	potassium ion binding	molecular_function	8	ENSG00000067225	1	93	10	17212	0.0527505
GO:0000288	nuclear-transcribed mRNA catabolic process, deadenylation-dependent decay	biological_process	12	ENSG00000135870	1	93	10	17212	0.0527505
GO:0005522	profilin binding	molecular_function	5	ENSG00000119729	1	93	10	17212	0.0527505
GO:0050863	regulation of T cell activation	biological_process	8	ENSG00000135870	1	93	10	17212	0.0527505
GO:0045637	regulation of myeloid cell differentiation	biological_process	7	ENSG00000067955	1	93	10	17212	0.0527505
GO:0002003	angiotensin maturation	biological_process	9	ENSG00000182220	1	93	10	17212	0.0527505
GO:0061179	negative regulation of insulin secretion involved in cellular response to glucose stimulus	biological_process	12	ENSG00000118263	1	93	10	17212	0.0527505
GO:0045722	positive regulation of gluconeogenesis	biological_process	11	ENSG00000186951	1	93	10	17212	0.0527505
GO:0007614	short-term memory	biological_process	6	ENSG00000101126	1	93	10	17212	0.0527505
GO:0016595	glutamate binding	molecular_function	8	ENSG00000079215	1	93	10	17212	0.0527505
GO:0048681	negative regulation of axon regeneration	biological_process	8	ENSG00000143418	1	93	10	17212	0.0527505
GO:0010944	negative regulation of transcription by competitive promoter binding	biological_process	10	ENSG00000118260	1	93	10	17212	0.0527505
GO:1905461	positive regulation of vascular associated smooth muscle cell apoptotic process	biological_process	12	ENSG00000101109	1	93	10	17212	0.0527505
GO:0005313	L-glutamate transmembrane transporter activity	molecular_function	8	ENSG00000079215	1	93	10	17212	0.0527505
GO:0032091	negative regulation of protein binding	biological_process	7	ENSG00000186951;ENSG00000101126	2	93	69	17212	0.0536527
GO:0005938	cell cortex	cellular_component	7	ENSG00000119729;ENSG00000170776;ENSG00000128585	3	93	158	17212	0.0541477
GO:0032868	response to insulin	biological_process	7	ENSG00000186951;ENSG00000067225	2	93	70	17212	0.0550414
GO:0050727	regulation of inflammatory response	biological_process	8	ENSG00000110330;ENSG00000103037	2	93	70	17212	0.0550414
GO:0030123	AP-3 adaptor complex	cellular_component	7	ENSG00000184056	1	93	11	17212	0.0578717
GO:0009743	response to carbohydrate	biological_process	6	ENSG00000101126	1	93	11	17212	0.0578717
GO:0008235	metalloexopeptidase activity	molecular_function	8	ENSG00000198585	1	93	11	17212	0.0578717
GO:0006995	cellular response to nitrogen starvation	biological_process	9	ENSG00000139112	1	93	11	17212	0.0578717
GO:0050855	regulation of B cell receptor signaling pathway	biological_process	9	ENSG00000067955	1	93	11	17212	0.0578717
GO:0045899	positive regulation of RNA polymerase II transcriptional preinitiation complex assembly	biological_process	8	ENSG00000118260	1	93	11	17212	0.0578717
GO:1901380	negative regulation of potassium ion transmembrane transport	biological_process	11	ENSG00000117152	1	93	11	17212	0.0578717
GO:0015179	L-amino acid transmembrane transporter activity	molecular_function	8	ENSG00000103064	1	93	11	17212	0.0578717
GO:0015165	pyrimidine nucleotide-sugar transmembrane transporter activity	molecular_function	7	ENSG00000283761	1	93	11	17212	0.0578717
GO:0070166	enamel mineralization	biological_process	8	ENSG00000186951	1	93	11	17212	0.0578717
GO:0097284	hepatocyte apoptotic process	biological_process	8	ENSG00000101109	1	93	11	17212	0.0578717
GO:0090481	pyrimidine nucleotide-sugar transmembrane transport	biological_process	9	ENSG00000283761	1	93	11	17212	0.0578717
GO:0033762	response to glucagon	biological_process	7	ENSG00000118260	1	93	11	17212	0.0578717
GO:0005068	transmembrane receptor protein tyrosine kinase adaptor activity	molecular_function	8	ENSG00000166225	1	93	11	17212	0.0578717
GO:0001841	neural tube formation	biological_process	8	ENSG00000101109	1	93	11	17212	0.0578717
GO:0001759	organ induction	biological_process	9	ENSG00000166225	1	93	11	17212	0.0578717
GO:0042975	peroxisome proliferator activated receptor binding	molecular_function	6	ENSG00000171456	1	93	11	17212	0.0578717
GO:0015075	ion transmembrane transporter activity	molecular_function	5	ENSG00000058063	1	93	11	17212	0.0578717
GO:2001020	regulation of response to DNA damage stimulus	biological_process	7	ENSG00000146476	1	93	11	17212	0.0578717
GO:0004842	ubiquitin-protein transferase activity	molecular_function	6	ENSG00000168159;ENSG00000110330;ENSG00000135870;ENSG00000048140	4	93	274	17212	0.0612065
GO:0003713	transcription coactivator activity	molecular_function	5	ENSG00000171456;ENSG00000067955;ENSG00000118263;ENSG00000110330	4	93	275	17212	0.0618635
GO:0060644	mammary gland epithelial cell differentiation	biological_process	7	ENSG00000213626	1	93	12	17212	0.0629655
GO:0045820	negative regulation of glycolytic process	biological_process	11	ENSG00000186951	1	93	12	17212	0.0629655
GO:0035631	CD40 receptor complex	cellular_component	6	ENSG00000110330	1	93	12	17212	0.0629655
GO:1902894	negative regulation of pri-miRNA transcription by RNA polymerase II	biological_process	11	ENSG00000186951	1	93	12	17212	0.0629655
GO:2000781	positive regulation of double-strand break repair	biological_process	11	ENSG00000198585	1	93	12	17212	0.0629655
GO:0010745	negative regulation of macrophage derived foam cell differentiation	biological_process	8	ENSG00000186951	1	93	12	17212	0.0629655
GO:0031404	chloride ion binding	molecular_function	6	ENSG00000198585	1	93	12	17212	0.0629655
GO:2000810	regulation of bicellular tight junction assembly	biological_process	7	ENSG00000067955	1	93	12	17212	0.0629655
GO:0046949	fatty-acyl-CoA biosynthetic process	biological_process	9	ENSG00000255154	1	93	12	17212	0.0629655
GO:0000812	Swr1 complex	cellular_component	8	ENSG00000143401	1	93	12	17212	0.0629655
GO:0035988	chondrocyte proliferation	biological_process	4	ENSG00000162733	1	93	12	17212	0.0629655
GO:0046007	negative regulation of activated T cell proliferation	biological_process	12	ENSG00000135870	1	93	12	17212	0.0629655
GO:0033130	acetylcholine receptor binding	molecular_function	6	ENSG00000157916	1	93	12	17212	0.0629655
GO:0010763	positive regulation of fibroblast migration	biological_process	9	ENSG00000162733	1	93	12	17212	0.0629655
GO:0030008	TRAPP complex	cellular_component	5	ENSG00000173626	1	93	12	17212	0.0629655
GO:0070989	oxidative demethylation	biological_process	5	ENSG00000140718	1	93	12	17212	0.0629655
GO:0005793	endoplasmic reticulum-Golgi intermediate compartment	cellular_component	6	ENSG00000243414;ENSG00000157916	2	93	76	17212	0.0636331
GO:0005884	actin filament	cellular_component	7	ENSG00000170776;ENSG00000119729	2	93	76	17212	0.0636331
GO:0043123	positive regulation of I-kappaB kinase/NF-kappaB signaling	biological_process	10	ENSG00000110330;ENSG00000170776;ENSG00000243414	3	93	169	17212	0.0636438
GO:0030897	HOPS complex	cellular_component	5	ENSG00000184056	1	93	13	17212	0.068032
GO:0031091	platelet alpha granule	cellular_component	9	ENSG00000184056	1	93	13	17212	0.068032
GO:0015813	L-glutamate transmembrane transport	biological_process	11	ENSG00000079215	1	93	13	17212	0.068032
GO:0048024	regulation of mRNA splicing, via spliceosome	biological_process	9	ENSG00000127804	1	93	13	17212	0.068032
GO:0051168	nuclear export	biological_process	9	ENSG00000170776	1	93	13	17212	0.068032
GO:0046039	GTP metabolic process	biological_process	11	ENSG00000119729	1	93	13	17212	0.068032
GO:0098993	anchored component of synaptic vesicle membrane	cellular_component	6	ENSG00000111540	1	93	13	17212	0.068032
GO:0001741	XY body	cellular_component	8	ENSG00000110330	1	93	13	17212	0.068032
GO:0033147	negative regulation of intracellular estrogen receptor signaling pathway	biological_process	10	ENSG00000213626	1	93	13	17212	0.068032
GO:0007064	mitotic sister chromatid cohesion	biological_process	6	ENSG00000286140	1	93	13	17212	0.068032
GO:0030889	negative regulation of B cell proliferation	biological_process	11	ENSG00000135870	1	93	13	17212	0.068032
GO:1902475	L-alpha-amino acid transmembrane transport	biological_process	12	ENSG00000103064	1	93	13	17212	0.068032
GO:0003724	RNA helicase activity	molecular_function	10	ENSG00000197275	1	93	13	17212	0.068032
GO:0045744	negative regulation of G protein-coupled receptor signaling pathway	biological_process	9	ENSG00000117152	1	93	13	17212	0.068032
GO:0001518	voltage-gated sodium channel complex	cellular_component	9	ENSG00000196876	1	93	13	17212	0.068032
GO:0045589	regulation of regulatory T cell differentiation	biological_process	10	ENSG00000067955	1	93	13	17212	0.068032
GO:0045616	regulation of keratinocyte differentiation	biological_process	9	ENSG00000067955	1	93	13	17212	0.068032
GO:1902043	positive regulation of extrinsic apoptotic signaling pathway via death domain receptors	biological_process	11	ENSG00000101109	1	93	13	17212	0.068032
GO:0033962	cytoplasmic mRNA processing body assembly	biological_process	9	ENSG00000135870	1	93	13	17212	0.068032
GO:0001952	regulation of cell-matrix adhesion	biological_process	7	ENSG00000162733	1	93	13	17212	0.068032
GO:0000976	transcription regulatory region sequence-specific DNA binding	molecular_function	8	ENSG00000177045;ENSG00000186951	2	93	79	17212	0.0680882
GO:0000981	DNA-binding transcription factor activity, RNA polymerase II-specific	molecular_function	5	ENSG00000067955;ENSG00000177045;ENSG00000118263;ENSG00000101126;ENSG00000165156;ENSG00000118260;ENSG00000159905;ENSG00000197063;ENSG00000189190;ENSG00000186951;ENSG00000170100;ENSG00000114439	12	93	1389	17212	0.070419
GO:0080009	mRNA methylation	biological_process	11	ENSG00000127804	1	93	14	17212	0.0730714
GO:0031103	axon regeneration	biological_process	7	ENSG00000134986	1	93	14	17212	0.0730714
GO:0033268	node of Ranvier	cellular_component	6	ENSG00000196876	1	93	14	17212	0.0730714
GO:0050811	GABA receptor binding	molecular_function	6	ENSG00000139112	1	93	14	17212	0.0730714
GO:0034656	nucleobase-containing small molecule catabolic process	biological_process	8	ENSG00000198585	1	93	14	17212	0.0730714
GO:0046889	positive regulation of lipid biosynthetic process	biological_process	8	ENSG00000118260	1	93	14	17212	0.0730714
GO:0006488	dolichol-linked oligosaccharide biosynthetic process	biological_process	8	ENSG00000119523	1	93	14	17212	0.0730714
GO:0034142	toll-like receptor 4 signaling pathway	biological_process	9	ENSG00000243414	1	93	14	17212	0.0730714
GO:0061014	positive regulation of mRNA catabolic process	biological_process	9	ENSG00000135870	1	93	14	17212	0.0730714
GO:2000737	negative regulation of stem cell differentiation	biological_process	8	ENSG00000213626	1	93	14	17212	0.0730714
GO:0035497	cAMP response element binding	molecular_function	11	ENSG00000118260	1	93	14	17212	0.0730714
GO:0006888	endoplasmic reticulum to Golgi vesicle-mediated transport	biological_process	7	ENSG00000173626;ENSG00000184500;ENSG00000243414	3	93	180	17212	0.0738565
GO:0003712	transcription coregulator activity	molecular_function	4	ENSG00000067955;ENSG00000118260	2	93	84	17212	0.075734
GO:0044297	cell body	cellular_component	4	ENSG00000182220;ENSG00000139112	2	93	84	17212	0.075734
GO:0008168	methyltransferase activity	molecular_function	6	ENSG00000127804;ENSG00000146476;ENSG00000103037	3	93	183	17212	0.0767617
GO:0010033	response to organic substance	biological_process	5	ENSG00000118260;ENSG00000067225	2	93	85	17212	0.0772948
GO:0030195	negative regulation of blood coagulation	biological_process	8	ENSG00000184500	1	93	15	17212	0.0780839
GO:0050678	regulation of epithelial cell proliferation	biological_process	7	ENSG00000166225	1	93	15	17212	0.0780839
GO:0060216	definitive hemopoiesis	biological_process	8	ENSG00000067955	1	93	15	17212	0.0780839
GO:0008757	S-adenosylmethionine-dependent methyltransferase activity	molecular_function	7	ENSG00000146476	1	93	15	17212	0.0780839
GO:0061049	cell growth involved in cardiac muscle cell development	biological_process	6	ENSG00000170776	1	93	15	17212	0.0780839
GO:0035591	signaling adaptor activity	molecular_function	6	ENSG00000004139	1	93	15	17212	0.0780839
GO:0086010	membrane depolarization during action potential	biological_process	7	ENSG00000196876	1	93	15	17212	0.0780839
GO:1903204	negative regulation of oxidative stress-induced neuron death	biological_process	9	ENSG00000260272	1	93	15	17212	0.0780839
GO:0030021	extracellular matrix structural constituent conferring compression resistance	molecular_function	5	ENSG00000106819	1	93	15	17212	0.0780839
GO:0015908	fatty acid transport	biological_process	8	ENSG00000186951	1	93	15	17212	0.0780839
GO:0010035	response to inorganic substance	biological_process	5	ENSG00000101126	1	93	15	17212	0.0780839
GO:0023026	MHC class II protein complex binding	molecular_function	6	ENSG00000067225	1	93	15	17212	0.0780839
GO:0001510	RNA methylation	biological_process	10	ENSG00000127804	1	93	15	17212	0.0780839
GO:1901222	regulation of NIK/NF-kappaB signaling	biological_process	9	ENSG00000110330	1	93	15	17212	0.0780839
GO:0000902	cell morphogenesis	biological_process	6	ENSG00000101109;ENSG00000171456	2	93	87	17212	0.0804468
GO:0042462	eye photoreceptor cell development	biological_process	8	ENSG00000235718	1	93	16	17212	0.0830695
GO:2001224	positive regulation of neuron migration	biological_process	9	ENSG00000260272	1	93	16	17212	0.0830695
GO:0061158	3'-UTR-mediated mRNA destabilization	biological_process	12	ENSG00000135870	1	93	16	17212	0.0830695
GO:0035729	cellular response to hepatocyte growth factor stimulus	biological_process	8	ENSG00000118260	1	93	16	17212	0.0830695
GO:0048535	lymph node development	biological_process	7	ENSG00000135870	1	93	16	17212	0.0830695
GO:0032963	collagen metabolic process	biological_process	4	ENSG00000184056	1	93	16	17212	0.0830695
GO:0042974	retinoic acid receptor binding	molecular_function	8	ENSG00000171456	1	93	16	17212	0.0830695
GO:0097502	mannosylation	biological_process	5	ENSG00000119523	1	93	16	17212	0.0830695
GO:0033146	regulation of intracellular estrogen receptor signaling pathway	biological_process	9	ENSG00000067955	1	93	16	17212	0.0830695
GO:0030705	cytoskeleton-dependent intracellular transport	biological_process	7	ENSG00000180834	1	93	16	17212	0.0830695
GO:1901379	regulation of potassium ion transmembrane transport	biological_process	10	ENSG00000117152	1	93	16	17212	0.0830695
GO:0032869	cellular response to insulin stimulus	biological_process	8	ENSG00000067225;ENSG00000119729	2	93	89	17212	0.0836384
GO:0005622	intracellular	cellular_component	4	ENSG00000119729;ENSG00000159905;ENSG00000139112;ENSG00000189190;ENSG00000116191;ENSG00000170100;ENSG00000111540	7	93	701	17212	0.084897
GO:0007409	axonogenesis	biological_process	9	ENSG00000118263;ENSG00000118260	2	93	90	17212	0.0852486
GO:0043312	neutrophil degranulation	biological_process	9	ENSG00000182220;ENSG00000058063;ENSG00000243414;ENSG00000111540;ENSG00000067225	5	93	435	17212	0.0866353
GO:0032147	activation of protein kinase activity	biological_process	12	ENSG00000101126;ENSG00000101109	2	93	91	17212	0.0868683
GO:0080111	DNA demethylation	biological_process	10	ENSG00000140718	1	93	17	17212	0.0880285
GO:0007405	neuroblast proliferation	biological_process	5	ENSG00000166225	1	93	17	17212	0.0880285
GO:0042730	fibrinolysis	biological_process	9	ENSG00000184500	1	93	17	17212	0.0880285
GO:0000956	nuclear-transcribed mRNA catabolic process	biological_process	11	ENSG00000135870	1	93	17	17212	0.0880285
GO:0045672	positive regulation of osteoclast differentiation	biological_process	10	ENSG00000118260	1	93	17	17212	0.0880285
GO:0001702	gastrulation with mouth forming second	biological_process	7	ENSG00000166225	1	93	17	17212	0.0880285
GO:0030515	snoRNA binding	molecular_function	7	ENSG00000198585	1	93	17	17212	0.0880285
GO:0004012	ATPase-coupled phospholipid transporter activity	molecular_function	6	ENSG00000058063	1	93	17	17212	0.0880285
GO:0060546	negative regulation of necroptotic process	biological_process	10	ENSG00000110330	1	93	17	17212	0.0880285
GO:0030660	Golgi-associated vesicle membrane	cellular_component	7	ENSG00000119729	1	93	17	17212	0.0880285
GO:0030667	secretory granule membrane	cellular_component	7	ENSG00000243414;ENSG00000111540	2	93	93	17212	0.0901354
GO:0007160	cell-matrix adhesion	biological_process	6	ENSG00000128585;ENSG00000162733	2	93	94	17212	0.0917825
GO:0032259	methylation	biological_process	4	ENSG00000127804;ENSG00000103037;ENSG00000146476	3	93	198	17212	0.0920228
GO:0005248	voltage-gated sodium channel activity	molecular_function	9	ENSG00000196876	1	93	18	17212	0.0929609
GO:0048193	Golgi vesicle transport	biological_process	7	ENSG00000173626	1	93	18	17212	0.0929609
GO:0000145	exocyst	cellular_component	7	ENSG00000182473	1	93	18	17212	0.0929609
GO:0006123	mitochondrial electron transport, cytochrome c to oxygen	biological_process	10	ENSG00000127184	1	93	18	17212	0.0929609
GO:0045088	regulation of innate immune response	biological_process	7	ENSG00000110330	1	93	18	17212	0.0929609
GO:0071294	cellular response to zinc ion	biological_process	8	ENSG00000118260	1	93	18	17212	0.0929609
GO:0044849	estrous cycle	biological_process	5	ENSG00000101126	1	93	18	17212	0.0929609
GO:1990126	retrograde transport, endosome to plasma membrane	biological_process	8	ENSG00000157538	1	93	18	17212	0.0929609
GO:1903077	negative regulation of protein localization to plasma membrane	biological_process	10	ENSG00000119729	1	93	18	17212	0.0929609
GO:0031668	cellular response to extracellular stimulus	biological_process	5	ENSG00000101126	1	93	18	17212	0.0929609
GO:0010460	positive regulation of heart rate	biological_process	10	ENSG00000117152	1	93	18	17212	0.0929609
GO:0005798	Golgi-associated vesicle	cellular_component	7	ENSG00000180834	1	93	18	17212	0.0929609
GO:0001223	transcription coactivator binding	molecular_function	7	ENSG00000186951	1	93	18	17212	0.0929609
GO:0000978	RNA polymerase II proximal promoter sequence-specific DNA binding	molecular_function	10	ENSG00000118263;ENSG00000186951;ENSG00000177045;ENSG00000197063;ENSG00000118260	5	93	450	17212	0.0966288
GO:0001503	ossification	biological_process	4	ENSG00000162733;ENSG00000067955	2	93	97	17212	0.0967764
GO:0016597	amino acid binding	molecular_function	7	ENSG00000079215	1	93	19	17212	0.097867
GO:0019934	cGMP-mediated signaling	biological_process	8	ENSG00000101126	1	93	19	17212	0.097867
GO:0001659	temperature homeostasis	biological_process	5	ENSG00000140718	1	93	19	17212	0.097867
GO:0050806	positive regulation of synaptic transmission	biological_process	8	ENSG00000079215	1	93	19	17212	0.097867
GO:0006536	glutamate metabolic process	biological_process	11	ENSG00000079215	1	93	19	17212	0.097867
GO:0001782	B cell homeostasis	biological_process	6	ENSG00000135870	1	93	19	17212	0.097867
GO:0043194	axon initial segment	cellular_component	6	ENSG00000196876	1	93	19	17212	0.097867
GO:1903508	positive regulation of nucleic acid-templated transcription	biological_process	10	ENSG00000067955;ENSG00000110330	2	93	100	17212	0.101846
GO:0017015	regulation of transforming growth factor beta receptor signaling pathway	biological_process	9	ENSG00000134986	1	93	20	17212	0.102747
GO:0048011	neurotrophin TRK receptor signaling pathway	biological_process	8	ENSG00000166225	1	93	20	17212	0.102747
GO:0003678	DNA helicase activity	molecular_function	10	ENSG00000197275	1	93	20	17212	0.102747
GO:1901214	regulation of neuron death	biological_process	7	ENSG00000004139	1	93	20	17212	0.102747
GO:0030031	cell projection assembly	biological_process	6	ENSG00000119729	1	93	20	17212	0.102747
GO:0008198	ferrous iron binding	molecular_function	9	ENSG00000140718	1	93	20	17212	0.102747
GO:0007169	transmembrane receptor protein tyrosine kinase signaling pathway	biological_process	7	ENSG00000162733;ENSG00000166225	2	93	101	17212	0.103553
GO:0010468	regulation of gene expression	biological_process	7	ENSG00000213626;ENSG00000186951;ENSG00000135870	3	93	211	17212	0.106185
GO:0045471	response to ethanol	biological_process	6	ENSG00000110330;ENSG00000117152	2	93	103	17212	0.106989
GO:0042098	T cell proliferation	biological_process	8	ENSG00000135870	1	93	21	17212	0.1076
GO:0036120	cellular response to platelet-derived growth factor stimulus	biological_process	6	ENSG00000118260	1	93	21	17212	0.1076
GO:0005104	fibroblast growth factor receptor binding	molecular_function	7	ENSG00000166225	1	93	21	17212	0.1076
GO:0042157	lipoprotein metabolic process	biological_process	7	ENSG00000186951	1	93	21	17212	0.1076
GO:0008361	regulation of cell size	biological_process	6	ENSG00000118260	1	93	21	17212	0.1076
GO:1900273	positive regulation of long-term synaptic potentiation	biological_process	9	ENSG00000118260	1	93	21	17212	0.1076
GO:0051018	protein kinase A binding	molecular_function	5	ENSG00000170776	1	93	21	17212	0.1076
GO:1903672	positive regulation of sprouting angiogenesis	biological_process	9	ENSG00000067225	1	93	21	17212	0.1076
GO:0016279	protein-lysine N-methyltransferase activity	molecular_function	8	ENSG00000103037	1	93	21	17212	0.1076
GO:0047485	protein N-terminus binding	molecular_function	5	ENSG00000119523;ENSG00000110330	2	93	106	17212	0.1122
GO:0048872	homeostasis of number of cells	biological_process	6	ENSG00000171456	1	93	22	17212	0.112428
GO:0001965	G-protein alpha-subunit binding	molecular_function	5	ENSG00000117152	1	93	22	17212	0.112428
GO:0030099	myeloid cell differentiation	biological_process	6	ENSG00000067955	1	93	22	17212	0.112428
GO:0005504	fatty acid binding	molecular_function	5	ENSG00000186951	1	93	22	17212	0.112428
GO:0030742	GTP-dependent protein binding	molecular_function	5	ENSG00000111540	1	93	22	17212	0.112428
GO:0048814	regulation of dendrite morphogenesis	biological_process	9	ENSG00000004139	1	93	22	17212	0.112428
GO:0043027	cysteine-type endopeptidase inhibitor activity involved in apoptotic process	molecular_function	9	ENSG00000110330	1	93	22	17212	0.112428
GO:0050775	positive regulation of dendrite morphogenesis	biological_process	10	ENSG00000260272	1	93	22	17212	0.112428
GO:0033993	response to lipid	biological_process	6	ENSG00000186951	1	93	22	17212	0.112428
GO:0012501	programmed cell death	biological_process	5	ENSG00000067225	1	93	22	17212	0.112428
GO:0030500	regulation of bone mineralization	biological_process	7	ENSG00000162733	1	93	22	17212	0.112428
GO:0007264	small GTPase mediated signal transduction	biological_process	6	ENSG00000119729;ENSG00000116191	2	93	107	17212	0.113951
GO:0005768	endosome	cellular_component	7	ENSG00000173442;ENSG00000058063;ENSG00000157538;ENSG00000184056;ENSG00000111540;ENSG00000243414	6	93	617	17212	0.116908
GO:0009792	embryo development ending in birth or egg hatching	biological_process	6	ENSG00000235718	1	93	23	17212	0.11723
GO:0055007	cardiac muscle cell differentiation	biological_process	7	ENSG00000170776	1	93	23	17212	0.11723
GO:0045776	negative regulation of blood pressure	biological_process	6	ENSG00000186951	1	93	23	17212	0.11723
GO:0005719	nuclear euchromatin	cellular_component	8	ENSG00000118260	1	93	23	17212	0.11723
GO:0015629	actin cytoskeleton	cellular_component	7	ENSG00000119523;ENSG00000162733;ENSG00000170776	3	93	223	17212	0.119968
GO:0030866	cortical actin cytoskeleton organization	biological_process	8	ENSG00000119729	1	93	24	17212	0.122006
GO:0032418	lysosome localization	biological_process	6	ENSG00000184056	1	93	24	17212	0.122006
GO:0097352	autophagosome maturation	biological_process	7	ENSG00000139112	1	93	24	17212	0.122006
GO:2000377	regulation of reactive oxygen species metabolic process	biological_process	7	ENSG00000110330	1	93	24	17212	0.122006
GO:0045332	phospholipid translocation	biological_process	9	ENSG00000058063	1	93	24	17212	0.122006
GO:0071398	cellular response to fatty acid	biological_process	7	ENSG00000118260	1	93	24	17212	0.122006
GO:0070372	regulation of ERK1 and ERK2 cascade	biological_process	11	ENSG00000166225	1	93	24	17212	0.122006
GO:0000151	ubiquitin ligase complex	cellular_component	5	ENSG00000048140;ENSG00000128585	2	93	112	17212	0.122814
GO:0033209	tumor necrosis factor-mediated signaling pathway	biological_process	7	ENSG00000110330;ENSG00000239697	2	93	114	17212	0.126405
GO:0050776	regulation of immune response	biological_process	6	ENSG00000111801;ENSG00000103855	2	93	114	17212	0.126405
GO:0031902	late endosome membrane	cellular_component	9	ENSG00000184056;ENSG00000243414	2	93	114	17212	0.126405
GO:0021983	pituitary gland development	biological_process	7	ENSG00000118260	1	93	25	17212	0.126757
GO:0043403	skeletal muscle tissue regeneration	biological_process	7	ENSG00000067225	1	93	25	17212	0.126757
GO:0009416	response to light stimulus	biological_process	6	ENSG00000079215	1	93	25	17212	0.126757
GO:0007026	negative regulation of microtubule depolymerization	biological_process	10	ENSG00000180834	1	93	25	17212	0.126757
GO:0061621	canonical glycolysis	biological_process	6	ENSG00000067225	1	93	25	17212	0.126757
GO:0003333	amino acid transmembrane transport	biological_process	11	ENSG00000103064	1	93	25	17212	0.126757
GO:0032590	dendrite membrane	cellular_component	7	ENSG00000139112	1	93	25	17212	0.126757
GO:0000188	inactivation of MAPK activity	biological_process	13	ENSG00000117152	1	93	25	17212	0.126757
GO:0046513	ceramide biosynthetic process	biological_process	10	ENSG00000143418	1	93	26	17212	0.131482
GO:0001569	branching involved in blood vessel morphogenesis	biological_process	7	ENSG00000101109	1	93	26	17212	0.131482
GO:0004129	cytochrome-c oxidase activity	molecular_function	6	ENSG00000127184	1	93	26	17212	0.131482
GO:0040014	regulation of multicellular organism growth	biological_process	7	ENSG00000140718	1	93	26	17212	0.131482
GO:0065003	protein-containing complex assembly	biological_process	6	ENSG00000103064;ENSG00000105926	2	93	117	17212	0.131839
GO:0016020	membrane	cellular_component	3	ENSG00000119523;ENSG00000079215;ENSG00000173442;ENSG00000166225;ENSG00000117152;ENSG00000140718;ENSG00000048140;ENSG00000139112;ENSG00000111540;ENSG00000143147;ENSG00000170776;ENSG00000205236;ENSG00000103064;ENSG00000240849;ENSG00000283761;ENSG00000105926;ENSG00000182220;ENSG00000196876;ENSG00000184056;ENSG00000116191;ENSG00000162733;ENSG00000119729;ENSG00000175938;ENSG00000148841;ENSG00000235718…	45	93	7260	17212	0.13368
GO:0030424	axon	cellular_component	6	ENSG00000101126;ENSG00000004139;ENSG00000196876;ENSG00000118260	4	93	364	17212	0.134447
GO:0050900	leukocyte migration	biological_process	4	ENSG00000184500;ENSG00000103064	2	93	119	17212	0.135491
GO:0000209	protein polyubiquitination	biological_process	12	ENSG00000110330;ENSG00000135870;ENSG00000067955	3	93	236	17212	0.135604
GO:0043029	T cell homeostasis	biological_process	6	ENSG00000135870	1	93	27	17212	0.136182
GO:2001238	positive regulation of extrinsic apoptotic signaling pathway	biological_process	10	ENSG00000239697	1	93	27	17212	0.136182
GO:0035329	hippo signaling	biological_process	6	ENSG00000101109	1	93	27	17212	0.136182
GO:0014047	glutamate secretion	biological_process	11	ENSG00000079215	1	93	27	17212	0.136182
GO:0043539	protein serine/threonine kinase activator activity	molecular_function	8	ENSG00000101109	1	93	27	17212	0.136182
GO:0007422	peripheral nervous system development	biological_process	6	ENSG00000196876	1	93	27	17212	0.136182
GO:0001835	blastocyst hatching	biological_process	6	ENSG00000139679	1	93	27	17212	0.136182
GO:0009897	external side of plasma membrane	cellular_component	5	ENSG00000103855;ENSG00000111801;ENSG00000182220	3	93	240	17212	0.140552
GO:0015171	amino acid transmembrane transporter activity	molecular_function	7	ENSG00000103064	1	93	28	17212	0.140857
GO:0034968	histone lysine methylation	biological_process	12	ENSG00000103037	1	93	28	17212	0.140857
GO:0019228	neuronal action potential	biological_process	7	ENSG00000196876	1	93	28	17212	0.140857
GO:0051491	positive regulation of filopodium assembly	biological_process	11	ENSG00000119729	1	93	28	17212	0.140857
GO:0000421	autophagosome membrane	cellular_component	8	ENSG00000139112	1	93	28	17212	0.140857
GO:0051482	positive regulation of cytosolic calcium ion concentration involved in phospholipase C-activating G protein-coupled signaling pathway	biological_process	14	ENSG00000139679	1	93	28	17212	0.140857
GO:0010803	regulation of tumor necrosis factor-mediated signaling pathway	biological_process	9	ENSG00000110330	1	93	28	17212	0.140857
GO:0006754	ATP biosynthetic process	biological_process	12	ENSG00000067225	1	93	28	17212	0.140857
GO:0048856	anatomical structure development	biological_process	4	ENSG00000177045	1	93	28	17212	0.140857
GO:0090543	Flemming body	cellular_component	4	ENSG00000182473	1	93	28	17212	0.140857
GO:0001228	DNA-binding transcription activator activity, RNA polymerase II-specific	molecular_function	6	ENSG00000186951;ENSG00000197063;ENSG00000118260;ENSG00000118263	4	93	375	17212	0.145162
GO:0051721	protein phosphatase 2A binding	molecular_function	8	ENSG00000214517	1	93	29	17212	0.145506
GO:0035198	miRNA binding	molecular_function	8	ENSG00000135870	1	93	29	17212	0.145506
GO:0034451	centriolar satellite	cellular_component	7	ENSG00000182473	1	93	29	17212	0.145506
GO:0035035	histone acetyltransferase binding	molecular_function	6	ENSG00000118260	1	93	29	17212	0.145506
GO:0043278	response to morphine	biological_process	6	ENSG00000117152	1	93	29	17212	0.145506
GO:0045664	regulation of neuron differentiation	biological_process	9	ENSG00000134986	1	93	29	17212	0.145506
GO:0048863	stem cell differentiation	biological_process	6	ENSG00000103037	1	93	29	17212	0.145506
GO:0046677	response to antibiotic	biological_process	5	ENSG00000079215	1	93	29	17212	0.145506
GO:0051059	NF-kappaB binding	molecular_function	8	ENSG00000103037	1	93	29	17212	0.145506
GO:0016579	protein deubiquitination	biological_process	9	ENSG00000103404;ENSG00000110330;ENSG00000171456	3	93	244	17212	0.145561
GO:0048511	rhythmic process	biological_process	3	ENSG00000118260;ENSG00000186951	2	93	125	17212	0.14658
GO:0003700	DNA-binding transcription factor activity	molecular_function	4	ENSG00000165156;ENSG00000159905;ENSG00000197063;ENSG00000118260;ENSG00000186951;ENSG00000067955;ENSG00000118263	7	93	813	17212	0.15005
GO:0007131	reciprocal meiotic recombination	biological_process	10	ENSG00000197275	1	93	30	17212	0.150131
GO:0060612	adipose tissue development	biological_process	7	ENSG00000140718	1	93	30	17212	0.150131
GO:0007528	neuromuscular junction development	biological_process	6	ENSG00000157916	1	93	30	17212	0.150131
GO:0048678	response to axon injury	biological_process	6	ENSG00000004139	1	93	30	17212	0.150131
GO:0031624	ubiquitin conjugating enzyme binding	molecular_function	7	ENSG00000186951	1	93	30	17212	0.150131
GO:0005272	sodium channel activity	molecular_function	8	ENSG00000196876	1	93	30	17212	0.150131
GO:0051924	regulation of calcium ion transport	biological_process	9	ENSG00000117152	1	93	31	17212	0.154731
GO:0030111	regulation of Wnt signaling pathway	biological_process	8	ENSG00000067955	1	93	31	17212	0.154731
GO:0040018	positive regulation of multicellular organism growth	biological_process	8	ENSG00000118260	1	93	31	17212	0.154731
GO:0001975	response to amphetamine	biological_process	6	ENSG00000117152	1	93	31	17212	0.154731
GO:0006904	vesicle docking involved in exocytosis	biological_process	7	ENSG00000184056	1	93	31	17212	0.154731
GO:0043542	endothelial cell migration	biological_process	9	ENSG00000239697	1	93	31	17212	0.154731
GO:0030534	adult behavior	biological_process	4	ENSG00000197063	1	93	31	17212	0.154731
GO:0030154	cell differentiation	biological_process	5	ENSG00000162733;ENSG00000186951;ENSG00000165156;ENSG00000204131;ENSG00000004139;ENSG00000118260;ENSG00000239697	7	93	826	17212	0.158849
GO:0010243	response to organonitrogen compound	biological_process	6	ENSG00000110330	1	93	32	17212	0.159307
GO:0032839	dendrite cytoplasm	cellular_component	9	ENSG00000139112	1	93	32	17212	0.159307
GO:0003281	ventricular septum development	biological_process	6	ENSG00000166225	1	93	32	17212	0.159307
GO:0046326	positive regulation of glucose import	biological_process	10	ENSG00000119729	1	93	32	17212	0.159307
GO:0048536	spleen development	biological_process	7	ENSG00000135870	1	93	32	17212	0.159307
GO:0003677	DNA binding	molecular_function	6	ENSG00000197063;ENSG00000067955;ENSG00000101126;ENSG00000159905;ENSG00000189190;ENSG00000118260;ENSG00000143418;ENSG00000197275;ENSG00000171456;ENSG00000114439;ENSG00000165156;ENSG00000170100;ENSG00000177045;ENSG00000186951;ENSG00000118263	15	93	2112	17212	0.162936
GO:0006479	protein methylation	biological_process	10	ENSG00000146476	1	93	33	17212	0.163857
GO:0045773	positive regulation of axon extension	biological_process	8	ENSG00000101126	1	93	33	17212	0.163857
GO:0009117	nucleotide metabolic process	biological_process	8	ENSG00000198585	1	93	33	17212	0.163857
GO:1902042	negative regulation of extrinsic apoptotic signaling pathway via death domain receptors	biological_process	11	ENSG00000148841	1	93	33	17212	0.163857
GO:0070507	regulation of microtubule cytoskeleton organization	biological_process	7	ENSG00000180834	1	93	33	17212	0.163857
GO:0005769	early endosome	cellular_component	8	ENSG00000111540;ENSG00000058063;ENSG00000184056	3	93	259	17212	0.164849
GO:0061025	membrane fusion	biological_process	6	ENSG00000184056	1	93	34	17212	0.168384
GO:0048469	cell maturation	biological_process	5	ENSG00000067955	1	93	34	17212	0.168384
GO:0006891	intra-Golgi vesicle-mediated transport	biological_process	8	ENSG00000173626	1	93	34	17212	0.168384
GO:0043565	sequence-specific DNA binding	molecular_function	7	ENSG00000067955;ENSG00000186951;ENSG00000118260;ENSG00000197063;ENSG00000177045	5	93	544	17212	0.171322
GO:0007163	establishment or maintenance of cell polarity	biological_process	4	ENSG00000119729	1	93	35	17212	0.172886
GO:0019882	antigen processing and presentation	biological_process	4	ENSG00000111540	1	93	35	17212	0.172886
GO:0004866	endopeptidase inhibitor activity	molecular_function	7	ENSG00000184500	1	93	35	17212	0.172886
GO:0030100	regulation of endocytosis	biological_process	7	ENSG00000111540	1	93	35	17212	0.172886
GO:0001103	RNA polymerase II repressing transcription factor binding	molecular_function	8	ENSG00000186951	1	93	35	17212	0.172886
GO:0004860	protein kinase inhibitor activity	molecular_function	7	ENSG00000148841	1	93	35	17212	0.172886
GO:0000422	autophagy of mitochondrion	biological_process	7	ENSG00000139112	1	93	36	17212	0.177364
GO:0030522	intracellular receptor signaling pathway	biological_process	5	ENSG00000186951	1	93	36	17212	0.177364
GO:0035094	response to nicotine	biological_process	6	ENSG00000118260	1	93	36	17212	0.177364
GO:0005887	integral component of plasma membrane	cellular_component	6	ENSG00000162733;ENSG00000254221;ENSG00000166225;ENSG00000079215;ENSG00000239697;ENSG00000253305;ENSG00000048140;ENSG00000103064;ENSG00000139679	9	93	1166	17212	0.177832
GO:0045595	regulation of cell differentiation	biological_process	6	ENSG00000110330	1	93	37	17212	0.181819
GO:0042220	response to cocaine	biological_process	6	ENSG00000117152	1	93	37	17212	0.181819
GO:0006096	glycolytic process	biological_process	10	ENSG00000067225	1	93	37	17212	0.181819
GO:0032456	endocytic recycling	biological_process	8	ENSG00000157538	1	93	37	17212	0.181819
GO:0019888	protein phosphatase regulator activity	molecular_function	6	ENSG00000214517	1	93	37	17212	0.181819
GO:0030177	positive regulation of Wnt signaling pathway	biological_process	9	ENSG00000182220	1	93	37	17212	0.181819
GO:0043531	ADP binding	molecular_function	9	ENSG00000067225	1	93	37	17212	0.181819
GO:0008360	regulation of cell shape	biological_process	8	ENSG00000119729;ENSG00000128585	2	93	144	17212	0.182783
GO:0004864	protein phosphatase inhibitor activity	molecular_function	7	ENSG00000214517	1	93	38	17212	0.186249
GO:1990090	cellular response to nerve growth factor stimulus	biological_process	8	ENSG00000118260	1	93	38	17212	0.186249
GO:0001102	RNA polymerase II activating transcription factor binding	molecular_function	8	ENSG00000118260	1	93	38	17212	0.186249
GO:0048813	dendrite morphogenesis	biological_process	9	ENSG00000118263	1	93	38	17212	0.186249
GO:0017112	Rab guanyl-nucleotide exchange factor activity	molecular_function	9	ENSG00000173626	1	93	38	17212	0.186249
GO:0016324	apical plasma membrane	cellular_component	5	ENSG00000235718;ENSG00000182220;ENSG00000162733	3	93	277	17212	0.188932
GO:0008277	regulation of G protein-coupled receptor signaling pathway	biological_process	8	ENSG00000117152	1	93	40	17212	0.195039
GO:0009755	hormone-mediated signaling pathway	biological_process	5	ENSG00000186951	1	93	40	17212	0.195039
GO:0052689	carboxylic ester hydrolase activity	molecular_function	6	ENSG00000214517	1	93	40	17212	0.195039
GO:0045944	positive regulation of transcription by RNA polymerase II	biological_process	10	ENSG00000171456;ENSG00000186951;ENSG00000177045;ENSG00000118260;ENSG00000067955;ENSG00000197063;ENSG00000118263;ENSG00000119729	8	93	1035	17212	0.195909
GO:0014823	response to activity	biological_process	4	ENSG00000118260	1	93	41	17212	0.199398
GO:0030544	Hsp70 protein binding	molecular_function	6	ENSG00000118260	1	93	41	17212	0.199398
GO:0017048	Rho GTPase binding	molecular_function	9	ENSG00000170776	1	93	41	17212	0.199398
GO:0007156	homophilic cell adhesion via plasma membrane adhesion molecules	biological_process	7	ENSG00000254221;ENSG00000253305	2	93	154	17212	0.202336
GO:0030282	bone mineralization	biological_process	7	ENSG00000106819	1	93	42	17212	0.203734
GO:0007595	lactation	biological_process	8	ENSG00000118260	1	93	42	17212	0.203734
GO:0001890	placenta development	biological_process	6	ENSG00000110330	1	93	42	17212	0.203734
GO:0006631	fatty acid metabolic process	biological_process	9	ENSG00000255154;ENSG00000186951	2	93	156	17212	0.206276
GO:0042110	T cell activation	biological_process	7	ENSG00000103855	1	93	43	17212	0.208047
GO:0015914	phospholipid transport	biological_process	8	ENSG00000058063	1	93	43	17212	0.208047
GO:0031100	animal organ regeneration	biological_process	6	ENSG00000067225	1	93	43	17212	0.208047
GO:0050885	neuromuscular process controlling balance	biological_process	7	ENSG00000079215	1	93	43	17212	0.208047
GO:0030449	regulation of complement activation	biological_process	7	ENSG00000184500	1	93	43	17212	0.208047
GO:0003729	mRNA binding	molecular_function	7	ENSG00000198585;ENSG00000135870	2	93	158	17212	0.210226
GO:0016021	integral component of membrane	cellular_component	5	ENSG00000258674;ENSG00000184500;ENSG00000175938;ENSG00000283761;ENSG00000285269;ENSG00000196876;ENSG00000079215;ENSG00000143147;ENSG00000205236;ENSG00000119523;ENSG00000235718;ENSG00000254221;ENSG00000182220;ENSG00000139679;ENSG00000261832;ENSG00000253305;ENSG00000103064;ENSG00000143418;ENSG00000127184;ENSG00000103855;ENSG00000162733;ENSG00000140718;ENSG00000111801;ENSG00000239697;ENSG00000048140…	29	93	4645	17212	0.210886
GO:0004879	nuclear receptor activity	molecular_function	6	ENSG00000186951	1	93	44	17212	0.212337
GO:0097191	extrinsic apoptotic signaling pathway	biological_process	6	ENSG00000239697	1	93	44	17212	0.212337
GO:0051591	response to cAMP	biological_process	8	ENSG00000110330	1	93	44	17212	0.212337
GO:0030864	cortical actin cytoskeleton	cellular_component	8	ENSG00000170776	1	93	44	17212	0.212337
GO:0030134	COPII-coated ER to Golgi transport vesicle	cellular_component	8	ENSG00000243414	1	93	44	17212	0.212337
GO:0032526	response to retinoic acid	biological_process	6	ENSG00000171456	1	93	45	17212	0.216604
GO:0006091	generation of precursor metabolites and energy	biological_process	5	ENSG00000127184	1	93	45	17212	0.216604
GO:0030199	collagen fibril organization	biological_process	7	ENSG00000162733	1	93	45	17212	0.216604
GO:0006520	cellular amino acid metabolic process	biological_process	8	ENSG00000103064	1	93	45	17212	0.216604
GO:0006355	regulation of transcription, DNA-templated	biological_process	8	ENSG00000159905;ENSG00000197063;ENSG00000171456;ENSG00000213626;ENSG00000170100;ENSG00000177045;ENSG00000118260;ENSG00000189190;ENSG00000213297;ENSG00000186951	10	93	1393	17212	0.218805
GO:0007165	signal transduction	biological_process	4	ENSG00000118260;ENSG00000128585;ENSG00000101109;ENSG00000239697;ENSG00000275832;ENSG00000139679;ENSG00000243414;ENSG00000004139;ENSG00000162733;ENSG00000143147	10	93	1394	17212	0.219442
GO:0045599	negative regulation of fat cell differentiation	biological_process	8	ENSG00000171456	1	93	46	17212	0.220848
GO:0008542	visual learning	biological_process	5	ENSG00000118260	1	93	46	17212	0.220848
GO:0000186	activation of MAPKK activity	biological_process	13	ENSG00000166225	1	93	46	17212	0.220848
GO:0030514	negative regulation of BMP signaling pathway	biological_process	11	ENSG00000158747	1	93	46	17212	0.220848
GO:0007599	hemostasis	biological_process	6	ENSG00000184500	1	93	46	17212	0.220848
GO:0030216	keratinocyte differentiation	biological_process	8	ENSG00000101109	1	93	46	17212	0.220848
GO:0048538	thymus development	biological_process	7	ENSG00000171456	1	93	46	17212	0.220848
GO:0071902	positive regulation of protein serine/threonine kinase activity	biological_process	12	ENSG00000101109	1	93	46	17212	0.220848
GO:0045893	positive regulation of transcription, DNA-templated	biological_process	9	ENSG00000118263;ENSG00000168159;ENSG00000213626;ENSG00000186951;ENSG00000118260	5	93	600	17212	0.224039
GO:0005125	cytokine activity	molecular_function	7	ENSG00000248871;ENSG00000239697	2	93	165	17212	0.224106
GO:0003007	heart morphogenesis	biological_process	6	ENSG00000171456	1	93	47	17212	0.225069
GO:0032515	negative regulation of phosphoprotein phosphatase activity	biological_process	12	ENSG00000214517	1	93	47	17212	0.225069
GO:0043666	regulation of phosphoprotein phosphatase activity	biological_process	11	ENSG00000214517	1	93	47	17212	0.225069
GO:0023014	signal transduction by protein phosphorylation	biological_process	10	ENSG00000101109	1	93	47	17212	0.225069
GO:0019902	phosphatase binding	molecular_function	6	ENSG00000186951	1	93	47	17212	0.225069
GO:0042127	regulation of cell population proliferation	biological_process	6	ENSG00000197063;ENSG00000110330	2	93	166	17212	0.226096
GO:0007596	blood coagulation	biological_process	7	ENSG00000197063;ENSG00000184500	2	93	166	17212	0.226096
GO:0006955	immune response	biological_process	4	ENSG00000248871;ENSG00000239697;ENSG00000103855	3	93	304	17212	0.226589
GO:0006367	transcription initiation from RNA polymerase II promoter	biological_process	9	ENSG00000186951;ENSG00000067955	2	93	167	17212	0.228086
GO:0005637	nuclear inner membrane	cellular_component	6	ENSG00000058063	1	93	48	17212	0.229267
GO:0031098	stress-activated protein kinase signaling cascade	biological_process	6	ENSG00000101109	1	93	48	17212	0.229267
GO:0042277	peptide binding	molecular_function	5	ENSG00000101126	1	93	48	17212	0.229267
GO:1903078	positive regulation of protein localization to plasma membrane	biological_process	10	ENSG00000157916	1	93	49	17212	0.233444
GO:0004714	transmembrane receptor protein tyrosine kinase activity	molecular_function	9	ENSG00000162733	1	93	49	17212	0.233444
GO:0050821	protein stabilization	biological_process	6	ENSG00000118260;ENSG00000101109	2	93	170	17212	0.234066
GO:0046777	protein autophosphorylation	biological_process	10	ENSG00000101109;ENSG00000162733	2	93	171	17212	0.236062
GO:0048146	positive regulation of fibroblast proliferation	biological_process	8	ENSG00000162733	1	93	50	17212	0.237597
GO:0030148	sphingolipid biosynthetic process	biological_process	9	ENSG00000143418	1	93	50	17212	0.237597
GO:0005654	nucleoplasm	cellular_component	6	ENSG00000128585;ENSG00000165156;ENSG00000101109;ENSG00000170619;ENSG00000214517;ENSG00000254852;ENSG00000103037;ENSG00000261832;ENSG00000067955;ENSG00000140563;ENSG00000286140;ENSG00000198585;ENSG00000171456;ENSG00000186951;ENSG00000114439;ENSG00000140718;ENSG00000197063;ENSG00000118260;ENSG00000183793;ENSG00000168159	20	93	3133	17212	0.239583
GO:0101003	ficolin-1-rich granule membrane	cellular_component	8	ENSG00000182220	1	93	51	17212	0.241729
GO:0003707	steroid hormone receptor activity	molecular_function	5	ENSG00000186951	1	93	51	17212	0.241729
GO:0042552	myelination	biological_process	6	ENSG00000196876	1	93	51	17212	0.241729
GO:0042102	positive regulation of T cell proliferation	biological_process	11	ENSG00000103855	1	93	51	17212	0.241729
GO:0005507	copper ion binding	molecular_function	8	ENSG00000101126	1	93	51	17212	0.241729
GO:0009898	cytoplasmic side of plasma membrane	cellular_component	5	ENSG00000110330	1	93	51	17212	0.241729
GO:0003924	GTPase activity	molecular_function	9	ENSG00000119729;ENSG00000111540;ENSG00000117152	3	93	315	17212	0.24234
GO:0060170	ciliary membrane	cellular_component	6	ENSG00000143147	1	93	52	17212	0.245838
GO:0043401	steroid hormone mediated signaling pathway	biological_process	6	ENSG00000186951	1	93	52	17212	0.245838
GO:0070936	protein K48-linked ubiquitination	biological_process	13	ENSG00000168159	1	93	52	17212	0.245838
GO:0005634	nucleus	cellular_component	6	ENSG00000101126;ENSG00000140718;ENSG00000128585;ENSG00000067955;ENSG00000110330;ENSG00000198585;ENSG00000170619;ENSG00000286140;ENSG00000119523;ENSG00000213626;ENSG00000186951;ENSG00000118260;ENSG00000067225;ENSG00000143418;ENSG00000170100;ENSG00000159905;ENSG00000197063;ENSG00000103037;ENSG00000145012;ENSG00000118263;ENSG00000168159;ENSG00000134986;ENSG00000197275;ENSG00000177045;ENSG00000143401…	37	93	6182	17212	0.249349
GO:1903561	extracellular vesicle	cellular_component	6	ENSG00000067225	1	93	53	17212	0.249925
GO:0005871	kinesin complex	cellular_component	5	ENSG00000274810	1	93	53	17212	0.249925
GO:0045860	positive regulation of protein kinase activity	biological_process	11	ENSG00000162733	1	93	54	17212	0.25399
GO:0035577	azurophil granule membrane	cellular_component	10	ENSG00000058063	1	93	54	17212	0.25399
GO:0005085	guanyl-nucleotide exchange factor activity	molecular_function	7	ENSG00000170776;ENSG00000116191	2	93	181	17212	0.256061
GO:0005886	plasma membrane	cellular_component	4	ENSG00000243414;ENSG00000145012;ENSG00000111801;ENSG00000103064;ENSG00000239697;ENSG00000162733;ENSG00000196876;ENSG00000143147;ENSG00000117152;ENSG00000058063;ENSG00000111540;ENSG00000235718;ENSG00000116191;ENSG00000119729;ENSG00000253305;ENSG00000166225;ENSG00000157916;ENSG00000254221;ENSG00000182473;ENSG00000079215;ENSG00000182220;ENSG00000184500;ENSG00000148841;ENSG00000139679;ENSG00000105926	25	93	4053	17212	0.257903
GO:0031532	actin cytoskeleton reorganization	biological_process	8	ENSG00000128585	1	93	55	17212	0.258034
GO:0019827	stem cell population maintenance	biological_process	4	ENSG00000103037	1	93	55	17212	0.258034
GO:1901224	positive regulation of NIK/NF-kappaB signaling	biological_process	10	ENSG00000135870	1	93	56	17212	0.262056
GO:0032508	DNA duplex unwinding	biological_process	9	ENSG00000197275	1	93	56	17212	0.262056
GO:0043406	positive regulation of MAP kinase activity	biological_process	12	ENSG00000170776	1	93	56	17212	0.262056
GO:0071363	cellular response to growth factor stimulus	biological_process	7	ENSG00000118260	1	93	56	17212	0.262056
GO:0009967	positive regulation of signal transduction	biological_process	8	ENSG00000004139	1	93	56	17212	0.262056
GO:0005516	calmodulin binding	molecular_function	5	ENSG00000117152;ENSG00000180834	2	93	184	17212	0.262071
GO:0006897	endocytosis	biological_process	7	ENSG00000111540;ENSG00000119729	2	93	185	17212	0.264075
GO:0005509	calcium ion binding	molecular_function	7	ENSG00000106819;ENSG00000140563;ENSG00000254221;ENSG00000253305;ENSG00000184500	5	93	640	17212	0.26439
GO:0030666	endocytic vesicle membrane	cellular_component	7	ENSG00000143147	1	93	57	17212	0.266056
GO:0019003	GDP binding	molecular_function	8	ENSG00000111540	1	93	57	17212	0.266056
GO:0030139	endocytic vesicle	cellular_component	7	ENSG00000111540	1	93	57	17212	0.266056
GO:0006006	glucose metabolic process	biological_process	8	ENSG00000067225	1	93	57	17212	0.266056
GO:0015297	antiporter activity	molecular_function	7	ENSG00000103064	1	93	57	17212	0.266056
GO:0000045	autophagosome assembly	biological_process	7	ENSG00000139112	1	93	57	17212	0.266056
GO:0043161	proteasome-mediated ubiquitin-dependent protein catabolic process	biological_process	11	ENSG00000168159;ENSG00000110330	2	93	187	17212	0.268083
GO:0005801	cis-Golgi network	cellular_component	6	ENSG00000180834	1	93	58	17212	0.270035
GO:0005874	microtubule	cellular_component	7	ENSG00000004139;ENSG00000139112;ENSG00000180834	3	93	335	17212	0.271411
GO:0009968	negative regulation of signal transduction	biological_process	8	ENSG00000117152	1	93	59	17212	0.273992
GO:0048306	calcium-dependent protein binding	molecular_function	5	ENSG00000119523	1	93	59	17212	0.273992
GO:0043086	negative regulation of catalytic activity	biological_process	6	ENSG00000143401	1	93	59	17212	0.273992
GO:0045669	positive regulation of osteoblast differentiation	biological_process	8	ENSG00000162733	1	93	59	17212	0.273992
GO:0032922	circadian regulation of gene expression	biological_process	5	ENSG00000186951	1	93	59	17212	0.273992
GO:0051592	response to calcium ion	biological_process	7	ENSG00000119523	1	93	59	17212	0.273992
GO:0010494	cytoplasmic stress granule	cellular_component	8	ENSG00000135870	1	93	59	17212	0.273992
GO:0090502	RNA phosphodiester bond hydrolysis, endonucleolytic	biological_process	10	ENSG00000198585	1	93	59	17212	0.273992
GO:0097190	apoptotic signaling pathway	biological_process	5	ENSG00000243414	1	93	60	17212	0.277929
GO:0030900	forebrain development	biological_process	5	ENSG00000166225	1	93	60	17212	0.277929
GO:0030145	manganese ion binding	molecular_function	8	ENSG00000198585	1	93	60	17212	0.277929
GO:0071944	cell periphery	cellular_component	4	ENSG00000079215	1	93	60	17212	0.277929
GO:0070821	tertiary granule membrane	cellular_component	8	ENSG00000182220	1	93	61	17212	0.281844
GO:0008144	drug binding	molecular_function	4	ENSG00000186951	1	93	61	17212	0.281844
GO:0071560	cellular response to transforming growth factor beta stimulus	biological_process	8	ENSG00000118260	1	93	61	17212	0.281844
GO:0051965	positive regulation of synapse assembly	biological_process	7	ENSG00000101126	1	93	62	17212	0.285738
GO:0010469	regulation of signaling receptor activity	biological_process	8	ENSG00000239697;ENSG00000248871;ENSG00000158747	3	93	345	17212	0.286102
GO:0008134	transcription factor binding	molecular_function	5	ENSG00000118260;ENSG00000186951;ENSG00000101109	3	93	345	17212	0.286102
GO:0006886	intracellular protein transport	biological_process	10	ENSG00000243414;ENSG00000111540;ENSG00000157538	3	93	346	17212	0.287575
GO:0007411	axon guidance	biological_process	6	ENSG00000166225;ENSG00000118263	2	93	197	17212	0.288113
GO:0031093	platelet alpha granule lumen	cellular_component	8	ENSG00000184500	1	93	63	17212	0.289611
GO:0003725	double-stranded RNA binding	molecular_function	7	ENSG00000135870	1	93	63	17212	0.289611
GO:0030136	clathrin-coated vesicle	cellular_component	8	ENSG00000184056	1	93	63	17212	0.289611
GO:0030173	integral component of Golgi membrane	cellular_component	7	ENSG00000157916	1	93	64	17212	0.293464
GO:0071300	cellular response to retinoic acid	biological_process	7	ENSG00000118260	1	93	64	17212	0.293464
GO:0071347	cellular response to interleukin-1	biological_process	8	ENSG00000135870	1	93	64	17212	0.293464
GO:0005776	autophagosome	cellular_component	7	ENSG00000139112	1	93	64	17212	0.293464
GO:0090575	RNA polymerase II transcription factor complex	cellular_component	6	ENSG00000186951	1	93	64	17212	0.293464
GO:0030374	nuclear receptor transcription coactivator activity	molecular_function	6	ENSG00000186951	1	93	64	17212	0.293464
GO:0060041	retina development in camera-type eye	biological_process	5	ENSG00000235718	1	93	65	17212	0.297296
GO:1902036	regulation of hematopoietic stem cell differentiation	biological_process	8	ENSG00000067955	1	93	66	17212	0.301107
GO:0051865	protein autoubiquitination	biological_process	12	ENSG00000168159	1	93	66	17212	0.301107
GO:0048812	neuron projection morphogenesis	biological_process	8	ENSG00000158747	1	93	66	17212	0.301107
GO:0035725	sodium ion transmembrane transport	biological_process	10	ENSG00000196876	1	93	66	17212	0.301107
GO:0043065	positive regulation of apoptotic process	biological_process	9	ENSG00000170776;ENSG00000101109;ENSG00000118260	3	93	356	17212	0.302339
GO:0051291	protein heterooligomerization	biological_process	8	ENSG00000110330	1	93	67	17212	0.304898
GO:0045652	regulation of megakaryocyte differentiation	biological_process	8	ENSG00000067955	1	93	68	17212	0.308668
GO:0030097	hemopoiesis	biological_process	7	ENSG00000171456	1	93	68	17212	0.308668
GO:0032482	Rab protein signal transduction	biological_process	8	ENSG00000111540	1	93	68	17212	0.308668
GO:0009749	response to glucose	biological_process	9	ENSG00000004139	1	93	68	17212	0.308668
GO:0038023	signaling receptor activity	molecular_function	4	ENSG00000182220;ENSG00000186951	2	93	208	17212	0.310082
GO:0005667	transcription factor complex	cellular_component	4	ENSG00000118260;ENSG00000177045	2	93	209	17212	0.312074
GO:0032092	positive regulation of protein binding	biological_process	7	ENSG00000101109	1	93	69	17212	0.312418
GO:0001938	positive regulation of endothelial cell proliferation	biological_process	9	ENSG00000239697	1	93	69	17212	0.312418
GO:0032956	regulation of actin cytoskeleton organization	biological_process	7	ENSG00000119729	1	93	69	17212	0.312418
GO:0005525	GTP binding	molecular_function	8	ENSG00000111540;ENSG00000198585;ENSG00000119729	3	93	363	17212	0.3127
GO:0019899	enzyme binding	molecular_function	5	ENSG00000048140;ENSG00000118260;ENSG00000146476	3	93	364	17212	0.314181
GO:0007186	G protein-coupled receptor signaling pathway	biological_process	5	ENSG00000143147;ENSG00000166225;ENSG00000139679;ENSG00000117152;ENSG00000170776	5	93	689	17212	0.315883
GO:0019722	calcium-mediated signaling	biological_process	7	ENSG00000140563	1	93	70	17212	0.316148
GO:0038061	NIK/NF-kappaB signaling	biological_process	6	ENSG00000110330	1	93	70	17212	0.316148
GO:0045732	positive regulation of protein catabolic process	biological_process	8	ENSG00000239697	1	93	70	17212	0.316148
GO:0009611	response to wounding	biological_process	5	ENSG00000079215	1	93	70	17212	0.316148
GO:0045121	membrane raft	cellular_component	6	ENSG00000119729;ENSG00000110330	2	93	212	17212	0.318042
GO:0016241	regulation of macroautophagy	biological_process	9	ENSG00000182473	1	93	71	17212	0.319858
GO:0005102	signaling receptor binding	molecular_function	5	ENSG00000239697;ENSG00000111801;ENSG00000103855	3	93	370	17212	0.323073
GO:0030672	synaptic vesicle membrane	cellular_component	4	ENSG00000140563	1	93	72	17212	0.323549
GO:0045892	negative regulation of transcription, DNA-templated	biological_process	9	ENSG00000177045;ENSG00000213626;ENSG00000165156;ENSG00000186951	4	93	534	17212	0.326576
GO:0030512	negative regulation of transforming growth factor beta receptor signaling pathway	biological_process	10	ENSG00000106819	1	93	73	17212	0.327219
GO:0061630	ubiquitin protein ligase activity	molecular_function	7	ENSG00000110330;ENSG00000135870	2	93	217	17212	0.327962
GO:0007266	Rho protein signal transduction	biological_process	8	ENSG00000119729	1	93	74	17212	0.33087
GO:0008544	epidermis development	biological_process	6	ENSG00000186951	1	93	74	17212	0.33087
GO:0008543	fibroblast growth factor receptor signaling pathway	biological_process	8	ENSG00000166225	1	93	74	17212	0.33087
GO:0003777	microtubule motor activity	molecular_function	10	ENSG00000274810	1	93	74	17212	0.33087
GO:0007584	response to nutrient	biological_process	7	ENSG00000067225	1	93	75	17212	0.334501
GO:0007286	spermatid development	biological_process	6	ENSG00000177045	1	93	75	17212	0.334501
GO:0003730	mRNA 3'-UTR binding	molecular_function	8	ENSG00000135870	1	93	75	17212	0.334501
GO:0005089	Rho guanyl-nucleotide exchange factor activity	molecular_function	9	ENSG00000170776	1	93	75	17212	0.334501
GO:0055038	recycling endosome membrane	cellular_component	9	ENSG00000058063	1	93	75	17212	0.334501
GO:0043130	ubiquitin binding	molecular_function	6	ENSG00000110330	1	93	76	17212	0.338112
GO:1902476	chloride transmembrane transport	biological_process	10	ENSG00000079215	1	93	76	17212	0.338112
GO:0007613	memory	biological_process	5	ENSG00000118260	1	93	76	17212	0.338112
GO:0005796	Golgi lumen	cellular_component	7	ENSG00000184500	1	93	77	17212	0.341704
GO:0000790	nuclear chromatin	cellular_component	7	ENSG00000118260;ENSG00000171456	2	93	224	17212	0.341787
GO:0016740	transferase activity	molecular_function	4	ENSG00000067225;ENSG00000119523;ENSG00000162733;ENSG00000101109;ENSG00000146476;ENSG00000103037;ENSG00000110330;ENSG00000135870;ENSG00000168159;ENSG00000127804;ENSG00000140718	11	93	1746	17212	0.342352
GO:0032088	negative regulation of NF-kappaB transcription factor activity	biological_process	7	ENSG00000103037	1	93	78	17212	0.345277
GO:0019903	protein phosphatase binding	molecular_function	7	ENSG00000214517	1	93	79	17212	0.348831
GO:0033138	positive regulation of peptidyl-serine phosphorylation	biological_process	11	ENSG00000101109	1	93	79	17212	0.348831
GO:0007507	heart development	biological_process	6	ENSG00000170776;ENSG00000186951	2	93	228	17212	0.349649
GO:0007189	adenylate cyclase-activating G protein-coupled receptor signaling pathway	biological_process	8	ENSG00000143147	1	93	80	17212	0.352366
GO:0008286	insulin receptor signaling pathway	biological_process	8	ENSG00000119729	1	93	80	17212	0.352366
GO:0051289	protein homotetramerization	biological_process	9	ENSG00000067225	1	93	80	17212	0.352366
GO:0007166	cell surface receptor signaling pathway	biological_process	5	ENSG00000110330;ENSG00000048140	2	93	232	17212	0.35748
GO:0050731	positive regulation of peptidyl-tyrosine phosphorylation	biological_process	11	ENSG00000101126	1	93	82	17212	0.359378
GO:0000724	double-strand break repair via homologous recombination	biological_process	10	ENSG00000197275	1	93	83	17212	0.362856
GO:0006890	retrograde vesicle-mediated transport, Golgi to endoplasmic reticulum	biological_process	8	ENSG00000157916	1	93	83	17212	0.362856
GO:0001889	liver development	biological_process	7	ENSG00000067225	1	93	83	17212	0.362856
GO:0051213	dioxygenase activity	molecular_function	5	ENSG00000140718	1	93	83	17212	0.362856
GO:0000932	P-body	cellular_component	8	ENSG00000135870	1	93	83	17212	0.362856
GO:0045666	positive regulation of neuron differentiation	biological_process	10	ENSG00000158747	1	93	84	17212	0.366315
GO:0035023	regulation of Rho protein signal transduction	biological_process	11	ENSG00000170776	1	93	86	17212	0.373178
GO:0007155	cell adhesion	biological_process	4	ENSG00000162733;ENSG00000254221;ENSG00000253305;ENSG00000145012	4	93	574	17212	0.375891
GO:0004843	thiol-dependent ubiquitin-specific protease activity	molecular_function	10	ENSG00000103404	1	93	87	17212	0.376582
GO:0042060	wound healing	biological_process	6	ENSG00000186951	1	93	87	17212	0.376582
GO:0007623	circadian rhythm	biological_process	4	ENSG00000118260	1	93	87	17212	0.376582
GO:0019216	regulation of lipid metabolic process	biological_process	7	ENSG00000186951	1	93	88	17212	0.379968
GO:0036459	thiol-dependent ubiquitinyl hydrolase activity	molecular_function	9	ENSG00000103404	1	93	88	17212	0.379968
GO:0000980	RNA polymerase II distal enhancer sequence-specific DNA binding	molecular_function	10	ENSG00000118260	1	93	89	17212	0.383335
GO:0010629	negative regulation of gene expression	biological_process	8	ENSG00000101126;ENSG00000118260	2	93	246	17212	0.384617
GO:0022900	electron transport chain	biological_process	6	ENSG00000127184	1	93	91	17212	0.390016
GO:0055085	transmembrane transport	biological_process	6	ENSG00000079215;ENSG00000283761;ENSG00000103064;ENSG00000196876	4	93	586	17212	0.390674
GO:0016236	macroautophagy	biological_process	7	ENSG00000139112	1	93	94	17212	0.399903
GO:1990830	cellular response to leukemia inhibitory factor	biological_process	8	ENSG00000118260	1	93	95	17212	0.403163
GO:0050728	negative regulation of inflammatory response	biological_process	9	ENSG00000186951	1	93	95	17212	0.403163
GO:0005913	cell-cell adherens junction	cellular_component	5	ENSG00000166225	1	93	96	17212	0.406406
GO:0001726	ruffle	cellular_component	6	ENSG00000128585	1	93	96	17212	0.406406
GO:0034220	ion transmembrane transport	biological_process	7	ENSG00000058063;ENSG00000196876	2	93	259	17212	0.409377
GO:0015293	symporter activity	molecular_function	7	ENSG00000079215	1	93	97	17212	0.409631
GO:0051087	chaperone binding	molecular_function	5	ENSG00000110330	1	93	98	17212	0.412839
GO:1902600	proton transmembrane transport	biological_process	9	ENSG00000127184	1	93	98	17212	0.412839
GO:0072562	blood microparticle	cellular_component	4	ENSG00000184500	1	93	99	17212	0.41603
GO:0042470	melanosome	cellular_component	8	ENSG00000111540	1	93	99	17212	0.41603
GO:0006366	transcription by RNA polymerase II	biological_process	9	ENSG00000067955;ENSG00000118260	2	93	263	17212	0.416901
GO:0007179	transforming growth factor beta receptor signaling pathway	biological_process	8	ENSG00000118260	1	93	100	17212	0.419203
GO:0001649	osteoblast differentiation	biological_process	6	ENSG00000067955	1	93	103	17212	0.428622
GO:0046872	metal ion binding	molecular_function	6	ENSG00000198585;ENSG00000079215;ENSG00000101126;ENSG00000168159;ENSG00000165156;ENSG00000110330;ENSG00000145012;ENSG00000170776;ENSG00000101109;ENSG00000159905;ENSG00000067225;ENSG00000186951;ENSG00000135870;ENSG00000285791;ENSG00000171456;ENSG00000118263;ENSG00000058063;ENSG00000170100;ENSG00000189190;ENSG00000140718	20	93	3499	17212	0.429302
GO:0016192	vesicle-mediated transport	biological_process	6	ENSG00000173626;ENSG00000184056	2	93	270	17212	0.429954
GO:0051091	positive regulation of DNA-binding transcription factor activity	biological_process	6	ENSG00000162733	1	93	104	17212	0.431728
GO:0009887	animal organ morphogenesis	biological_process	5	ENSG00000171456	1	93	104	17212	0.431728
GO:0005096	GTPase activator activity	molecular_function	6	ENSG00000117152;ENSG00000275832	2	93	271	17212	0.431807
GO:0042593	glucose homeostasis	biological_process	8	ENSG00000118263	1	93	105	17212	0.434817
GO:0007015	actin filament organization	biological_process	6	ENSG00000119729	1	93	106	17212	0.437889
GO:0006468	protein phosphorylation	biological_process	9	ENSG00000170776;ENSG00000101109;ENSG00000118260;ENSG00000162733	4	93	628	17212	0.441965
GO:0034774	secretory granule lumen	cellular_component	7	ENSG00000067225	1	93	108	17212	0.443985
GO:0002376	immune system process	biological_process	3	ENSG00000111801;ENSG00000004139;ENSG00000243414	3	93	457	17212	0.450219
GO:0004713	protein tyrosine kinase activity	molecular_function	8	ENSG00000162733	1	93	112	17212	0.455981
GO:0043488	regulation of mRNA stability	biological_process	10	ENSG00000135870	1	93	113	17212	0.458939
GO:0071805	potassium ion transmembrane transport	biological_process	10	ENSG00000079215	1	93	113	17212	0.458939
GO:0007030	Golgi organization	biological_process	6	ENSG00000243414	1	93	113	17212	0.458939
GO:0005765	lysosomal membrane	cellular_component	9	ENSG00000261832;ENSG00000184056	2	93	287	17212	0.461007
GO:0010976	positive regulation of neuron projection development	biological_process	11	ENSG00000101126	1	93	114	17212	0.461882
GO:0006814	sodium ion transport	biological_process	9	ENSG00000196876	1	93	114	17212	0.461882
GO:0007275	multicellular organism development	biological_process	4	ENSG00000186951;ENSG00000239697;ENSG00000140563;ENSG00000213626;ENSG00000177045;ENSG00000143147	6	93	1007	17212	0.463407
GO:0012505	endomembrane system	cellular_component	4	ENSG00000166225	1	93	115	17212	0.464809
GO:0000226	microtubule cytoskeleton organization	biological_process	7	ENSG00000180834	1	93	115	17212	0.464809
GO:0071356	cellular response to tumor necrosis factor	biological_process	8	ENSG00000110330	1	93	115	17212	0.464809
GO:0006887	exocytosis	biological_process	7	ENSG00000182473	1	93	115	17212	0.464809
GO:0042493	response to drug	biological_process	5	ENSG00000079215;ENSG00000118260	2	93	290	17212	0.466387
GO:0002576	platelet degranulation	biological_process	9	ENSG00000184500	1	93	116	17212	0.46772
GO:0000187	activation of MAPK activity	biological_process	13	ENSG00000166225	1	93	116	17212	0.46772
GO:0042802	identical protein binding	molecular_function	5	ENSG00000110330;ENSG00000118260;ENSG00000128585;ENSG00000198585;ENSG00000067225;ENSG00000101109	6	93	1015	17212	0.471099
GO:0032991	protein-containing complex	cellular_component	3	ENSG00000101109;ENSG00000213626;ENSG00000110330;ENSG00000117152	4	93	653	17212	0.471943
GO:1904813	ficolin-1-rich granule lumen	cellular_component	7	ENSG00000067225	1	93	118	17212	0.473496
GO:0030018	Z disc	cellular_component	5	ENSG00000196876	1	93	118	17212	0.473496
GO:0008284	positive regulation of cell population proliferation	biological_process	7	ENSG00000198585;ENSG00000168159;ENSG00000162733	3	93	475	17212	0.475513
GO:0010951	negative regulation of endopeptidase activity	biological_process	11	ENSG00000184500	1	93	119	17212	0.47636
GO:0014070	response to organic cyclic compound	biological_process	6	ENSG00000110330	1	93	119	17212	0.47636
GO:0003690	double-stranded DNA binding	molecular_function	7	ENSG00000118260	1	93	120	17212	0.479209
GO:0046982	protein heterodimerization activity	molecular_function	6	ENSG00000165156;ENSG00000119523;ENSG00000197063	3	93	479	17212	0.481064
GO:0048471	perinuclear region of cytoplasm	cellular_component	6	ENSG00000184056;ENSG00000170776;ENSG00000239697;ENSG00000119523	4	93	663	17212	0.483779
GO:0070588	calcium ion transmembrane transport	biological_process	11	ENSG00000175938	1	93	122	17212	0.484861
GO:0031410	cytoplasmic vesicle	cellular_component	6	ENSG00000143401;ENSG00000139112;ENSG00000196876;ENSG00000184056	4	93	664	17212	0.484957
GO:0045296	cadherin binding	molecular_function	6	ENSG00000067225;ENSG00000214517	2	93	302	17212	0.487591
GO:0042393	histone binding	molecular_function	5	ENSG00000143401	1	93	123	17212	0.487665
GO:0018108	peptidyl-tyrosine phosphorylation	biological_process	10	ENSG00000162733	1	93	124	17212	0.490453
GO:0007605	sensory perception of sound	biological_process	8	ENSG00000079215	1	93	125	17212	0.493226
GO:0007417	central nervous system development	biological_process	6	ENSG00000101109	1	93	125	17212	0.493226
GO:0007399	nervous system development	biological_process	6	ENSG00000158747;ENSG00000004139;ENSG00000196876	3	93	488	17212	0.493456
GO:0000785	chromatin	cellular_component	6	ENSG00000118260	1	93	126	17212	0.495984
GO:0006351	transcription, DNA-templated	biological_process	8	ENSG00000171456	1	93	127	17212	0.498728
GO:0005244	voltage-gated ion channel activity	molecular_function	9	ENSG00000196876	1	93	129	17212	0.50417
GO:0000086	G2/M transition of mitotic cell cycle	biological_process	7	ENSG00000214517	1	93	131	17212	0.509554
GO:0005215	transporter activity	molecular_function	3	ENSG00000283761	1	93	133	17212	0.51488
GO:0005794	Golgi apparatus	cellular_component	6	ENSG00000173626;ENSG00000180834;ENSG00000157916;ENSG00000184056;ENSG00000243414;ENSG00000139112;ENSG00000058063	7	93	1248	17212	0.515973
GO:0043547	positive regulation of GTPase activity	biological_process	8	ENSG00000275832;ENSG00000117152	2	93	319	17212	0.51673
GO:0005770	late endosome	cellular_component	8	ENSG00000184056	1	93	134	17212	0.517522
GO:0008234	cysteine-type peptidase activity	molecular_function	7	ENSG00000103404	1	93	134	17212	0.517522
GO:0034765	regulation of ion transmembrane transport	biological_process	8	ENSG00000196876	1	93	135	17212	0.520149
GO:0006869	lipid transport	biological_process	7	ENSG00000058063	1	93	135	17212	0.520149
GO:0043524	negative regulation of neuron apoptotic process	biological_process	10	ENSG00000101126	1	93	136	17212	0.522763
GO:0030426	growth cone	cellular_component	5	ENSG00000254221	1	93	136	17212	0.522763
GO:0045766	positive regulation of angiogenesis	biological_process	8	ENSG00000239697	1	93	137	17212	0.525362
GO:0006629	lipid metabolic process	biological_process	5	ENSG00000186951;ENSG00000255154;ENSG00000143418	3	93	512	17212	0.525783
GO:0062023	collagen-containing extracellular matrix	cellular_component	5	ENSG00000067225;ENSG00000106819	2	93	326	17212	0.528412
GO:0071222	cellular response to lipopolysaccharide	biological_process	8	ENSG00000243414	1	93	140	17212	0.533076
GO:0004386	helicase activity	molecular_function	9	ENSG00000197275	1	93	141	17212	0.535619
GO:0002250	adaptive immune response	biological_process	5	ENSG00000111801	1	93	144	17212	0.543168
GO:0051726	regulation of cell cycle	biological_process	6	ENSG00000110330	1	93	146	17212	0.548133
GO:0018105	peptidyl-serine phosphorylation	biological_process	10	ENSG00000101109	1	93	146	17212	0.548133
GO:0045087	innate immune response	biological_process	5	ENSG00000004139;ENSG00000243414	2	93	339	17212	0.549604
GO:0005929	cilium	cellular_component	4	ENSG00000143147;ENSG00000067225	2	93	344	17212	0.557578
GO:0016829	lyase activity	molecular_function	4	ENSG00000255154	1	93	150	17212	0.557903
GO:0031982	vesicle	cellular_component	5	ENSG00000067225	1	93	152	17212	0.56271
GO:0006325	chromatin organization	biological_process	5	ENSG00000171456;ENSG00000143401	2	93	350	17212	0.567016
GO:0030659	cytoplasmic vesicle membrane	cellular_component	6	ENSG00000139112	1	93	155	17212	0.569823
GO:0022857	transmembrane transporter activity	molecular_function	4	ENSG00000103064	1	93	155	17212	0.569823
GO:0042995	cell projection	cellular_component	4	ENSG00000143147;ENSG00000079215;ENSG00000004139;ENSG00000119729;ENSG00000128585	5	93	934	17212	0.573214
GO:0005216	ion channel activity	molecular_function	6	ENSG00000196876	1	93	159	17212	0.579129
GO:0001934	positive regulation of protein phosphorylation	biological_process	10	ENSG00000101109	1	93	159	17212	0.579129
GO:0016567	protein ubiquitination	biological_process	11	ENSG00000135870;ENSG00000168159;ENSG00000048140	3	93	555	17212	0.580805
GO:0005759	mitochondrial matrix	cellular_component	7	ENSG00000118260;ENSG00000255154	2	93	359	17212	0.580904
GO:0051897	positive regulation of protein kinase B signaling	biological_process	10	ENSG00000166225	1	93	160	17212	0.581424
GO:0030036	actin cytoskeleton organization	biological_process	7	ENSG00000119729	1	93	161	17212	0.583707
GO:0015630	microtubule cytoskeleton	cellular_component	7	ENSG00000004139	1	93	161	17212	0.583707
GO:0006914	autophagy	biological_process	6	ENSG00000139112	1	93	162	17212	0.585977
GO:0005802	trans-Golgi network	cellular_component	7	ENSG00000058063	1	93	164	17212	0.590482
GO:0000122	negative regulation of transcription by RNA polymerase II	biological_process	10	ENSG00000067955;ENSG00000118263;ENSG00000165156;ENSG00000186951	4	93	761	17212	0.59341
GO:0006357	regulation of transcription by RNA polymerase II	biological_process	9	ENSG00000114439;ENSG00000101126;ENSG00000118263;ENSG00000159905;ENSG00000189190;ENSG00000170100	6	93	1152	17212	0.596743
GO:0008270	zinc ion binding	molecular_function	8	ENSG00000118263;ENSG00000110330;ENSG00000135870;ENSG00000186951	4	93	766	17212	0.59864
GO:0016311	dephosphorylation	biological_process	7	ENSG00000198585	1	93	168	17212	0.599346
GO:0007568	aging	biological_process	4	ENSG00000118260	1	93	168	17212	0.599346
GO:0005911	cell-cell junction	cellular_component	4	ENSG00000166225	1	93	168	17212	0.599346
GO:0003676	nucleic acid binding	molecular_function	5	ENSG00000213297;ENSG00000165156;ENSG00000101126;ENSG00000159905;ENSG00000189190;ENSG00000118263;ENSG00000170100	7	93	1356	17212	0.605992
GO:0090090	negative regulation of canonical Wnt signaling pathway	biological_process	10	ENSG00000101109	1	93	172	17212	0.60802
GO:0006486	protein glycosylation	biological_process	9	ENSG00000119523	1	93	172	17212	0.60802
GO:0043005	neuron projection	cellular_component	5	ENSG00000182220;ENSG00000079215	2	93	379	17212	0.610606
GO:0008152	metabolic process	biological_process	3	ENSG00000067225	1	93	175	17212	0.614403
GO:0007601	visual perception	biological_process	8	ENSG00000235718	1	93	175	17212	0.614403
GO:0005515	protein binding	molecular_function	4	ENSG00000146476;ENSG00000143401;ENSG00000166225;ENSG00000239697;ENSG00000134986;ENSG00000170100;ENSG00000105926;ENSG00000186951;ENSG00000139112;ENSG00000148841;ENSG00000182473;ENSG00000103855;ENSG00000158747;ENSG00000162733;ENSG00000184056;ENSG00000243414;ENSG00000119729;ENSG00000004139;ENSG00000101126;ENSG00000135870;ENSG00000197275;ENSG00000182220;ENSG00000196876;ENSG00000111540;ENSG00000197063…	54	93	10157	17212	0.616904
GO:0000166	nucleotide binding	molecular_function	5	ENSG00000196876;ENSG00000101109;ENSG00000119729;ENSG00000162733;ENSG00000111540;ENSG00000198585;ENSG00000058063;ENSG00000067225;ENSG00000197275	9	93	1756	17212	0.617158
GO:0042803	protein homodimerization activity	molecular_function	6	ENSG00000101109;ENSG00000158747;ENSG00000128585;ENSG00000198585	4	93	786	17212	0.619167
GO:0016607	nuclear speck	cellular_component	8	ENSG00000273173;ENSG00000140718	2	93	386	17212	0.620622
GO:0043025	neuronal cell body	cellular_component	5	ENSG00000079215;ENSG00000101126	2	93	386	17212	0.620622
GO:0016323	basolateral plasma membrane	cellular_component	5	ENSG00000103064	1	93	182	17212	0.628901
GO:0006811	ion transport	biological_process	6	ENSG00000196876;ENSG00000079215;ENSG00000058063	3	93	597	17212	0.630589
GO:0043235	receptor complex	cellular_component	4	ENSG00000162733	1	93	183	17212	0.630927
GO:0004930	G protein-coupled receptor activity	molecular_function	6	ENSG00000139679;ENSG00000143147	2	93	401	17212	0.641424
GO:0003682	chromatin binding	molecular_function	4	ENSG00000101126;ENSG00000171456	2	93	401	17212	0.641424
GO:0005783	endoplasmic reticulum	cellular_component	6	ENSG00000243414;ENSG00000139112;ENSG00000240849;ENSG00000157916;ENSG00000173626;ENSG00000058063;ENSG00000143418	7	93	1405	17212	0.643954
GO:0046983	protein dimerization activity	molecular_function	5	ENSG00000101109	1	93	191	17212	0.64675
GO:0005925	focal adhesion	cellular_component	7	ENSG00000145012;ENSG00000162733	2	93	405	17212	0.64682
GO:0001701	in utero embryonic development	biological_process	8	ENSG00000197063	1	93	192	17212	0.648681
GO:0008285	negative regulation of cell population proliferation	biological_process	7	ENSG00000101109;ENSG00000177045	2	93	407	17212	0.649494
GO:0000139	Golgi membrane	cellular_component	7	ENSG00000283761;ENSG00000184500;ENSG00000157916	3	93	619	17212	0.655019
GO:0030425	dendrite	cellular_component	6	ENSG00000101126;ENSG00000004139	2	93	420	17212	0.666491
GO:0007268	chemical synaptic transmission	biological_process	9	ENSG00000079215	1	93	204	17212	0.671044
GO:0015031	protein transport	biological_process	9	ENSG00000111540;ENSG00000184056;ENSG00000182473	3	93	645	17212	0.682401
GO:0001227	DNA-binding transcription repressor activity, RNA polymerase II-specific	molecular_function	6	ENSG00000186951	1	93	213	17212	0.686886
GO:0016757	transferase activity, transferring glycosyl groups	molecular_function	5	ENSG00000119523	1	93	214	17212	0.688599
GO:0006915	apoptotic process	biological_process	6	ENSG00000110330;ENSG00000101109;ENSG00000239697	3	93	653	17212	0.6905
GO:0035556	intracellular signal transduction	biological_process	5	ENSG00000170776;ENSG00000101109	2	93	447	17212	0.699693
GO:0019901	protein kinase binding	molecular_function	7	ENSG00000119729;ENSG00000214517	2	93	450	17212	0.70321
GO:0010008	endosome membrane	cellular_component	8	ENSG00000243414	1	93	224	17212	0.705228
GO:0005739	mitochondrion	cellular_component	6	ENSG00000255154;ENSG00000067225;ENSG00000118260;ENSG00000139112;ENSG00000258674;ENSG00000127184;ENSG00000004139	7	93	1491	17212	0.705357
GO:0030198	extracellular matrix organization	biological_process	6	ENSG00000162733	1	93	225	17212	0.706841
GO:0008017	microtubule binding	molecular_function	7	ENSG00000180834	1	93	226	17212	0.708446
GO:0044212	transcription regulatory region DNA binding	molecular_function	7	ENSG00000118260	1	93	229	17212	0.713209
GO:0016301	kinase activity	molecular_function	6	ENSG00000162733;ENSG00000067225;ENSG00000101109	3	93	679	17212	0.715771
GO:0003714	transcription corepressor activity	molecular_function	5	ENSG00000165156	1	93	231	17212	0.716342
GO:0016310	phosphorylation	biological_process	7	ENSG00000162733;ENSG00000101109;ENSG00000067225	3	93	684	17212	0.720447
GO:0031965	nuclear membrane	cellular_component	5	ENSG00000143418	1	93	236	17212	0.724026
GO:0007420	brain development	biological_process	6	ENSG00000117152	1	93	247	17212	0.740213
GO:0031012	extracellular matrix	cellular_component	4	ENSG00000106819	1	93	248	17212	0.741637
GO:0001525	angiogenesis	biological_process	5	ENSG00000239697	1	93	248	17212	0.741637
GO:0005789	endoplasmic reticulum membrane	cellular_component	5	ENSG00000143418;ENSG00000240849;ENSG00000184500;ENSG00000119523	4	93	927	17212	0.744719
GO:0006974	cellular response to DNA damage stimulus	biological_process	6	ENSG00000146476;ENSG00000197275	2	93	496	17212	0.753014
GO:0019904	protein domain specific binding	molecular_function	5	ENSG00000186951	1	93	260	17212	0.758136
GO:0003824	catalytic activity	molecular_function	3	ENSG00000182220;ENSG00000067225	2	93	505	17212	0.761884
GO:0000165	MAPK cascade	biological_process	11	ENSG00000166225	1	93	263	17212	0.762095
GO:0005615	extracellular space	cellular_component	4	ENSG00000182220;ENSG00000184500;ENSG00000101126;ENSG00000158747;ENSG00000239697;ENSG00000248871	6	93	1377	17212	0.764012
GO:0000977	RNA polymerase II regulatory region sequence-specific DNA binding	molecular_function	9	ENSG00000186951	1	93	268	17212	0.768551
GO:0043231	intracellular membrane-bounded organelle	cellular_component	5	ENSG00000111540;ENSG00000103064;ENSG00000139679	3	93	753	17212	0.779083
GO:0044877	protein-containing complex binding	molecular_function	4	ENSG00000186951	1	93	279	17212	0.782152
GO:0008289	lipid binding	molecular_function	4	ENSG00000186951	1	93	281	17212	0.784538
GO:0031625	ubiquitin protein ligase binding	molecular_function	7	ENSG00000139112	1	93	287	17212	0.791543
GO:0016604	nuclear body	cellular_component	7	ENSG00000101109	1	93	287	17212	0.791543
GO:0006511	ubiquitin-dependent protein catabolic process	biological_process	10	ENSG00000103404	1	93	288	17212	0.792689
GO:0004672	protein kinase activity	molecular_function	7	ENSG00000162733;ENSG00000101109	2	93	541	17212	0.794686
GO:0030054	cell junction	cellular_component	3	ENSG00000145012;ENSG00000004139;ENSG00000128585	3	93	781	17212	0.799865
GO:0009986	cell surface	cellular_component	4	ENSG00000157916;ENSG00000079215	2	93	551	17212	0.80307
GO:0005524	ATP binding	molecular_function	5	ENSG00000162733;ENSG00000101109;ENSG00000067225;ENSG00000197275;ENSG00000058063;ENSG00000196876	6	93	1451	17212	0.806471
GO:0016491	oxidoreductase activity	molecular_function	4	ENSG00000140718;ENSG00000285791	2	93	556	17212	0.807149
GO:0045202	synapse	cellular_component	3	ENSG00000004139;ENSG00000128585	2	93	566	17212	0.815084
GO:0006508	proteolysis	biological_process	7	ENSG00000198585;ENSG00000103404	2	93	567	17212	0.815861
GO:0006954	inflammatory response	biological_process	6	ENSG00000243414	1	93	318	17212	0.824302
GO:0008283	cell population proliferation	biological_process	3	ENSG00000103855	1	93	329	17212	0.834656
GO:0070062	extracellular exosome	cellular_component	7	ENSG00000111540;ENSG00000184500;ENSG00000105926;ENSG00000275832;ENSG00000182220;ENSG00000119729;ENSG00000067225;ENSG00000286140	8	93	1961	17212	0.845384
GO:0005764	lysosome	cellular_component	8	ENSG00000184056	1	93	370	17212	0.8682
GO:0006281	DNA repair	biological_process	8	ENSG00000197275	1	93	380	17212	0.875301
GO:0010628	positive regulation of gene expression	biological_process	8	ENSG00000197063	1	93	391	17212	0.882676
GO:0055114	oxidation-reduction process	biological_process	4	ENSG00000285791;ENSG00000140718	2	93	684	17212	0.88902
GO:0004674	protein serine/threonine kinase activity	molecular_function	8	ENSG00000101109	1	93	410	17212	0.894412
GO:0005815	microtubule organizing center	cellular_component	6	ENSG00000182473	1	93	421	17212	0.900668
GO:0005737	cytoplasm	cellular_component	5	ENSG00000116191;ENSG00000117152;ENSG00000184056;ENSG00000004139;ENSG00000067225;ENSG00000198585;ENSG00000101126;ENSG00000170776;ENSG00000180834;ENSG00000128585;ENSG00000266338;ENSG00000182473;ENSG00000135870;ENSG00000170619;ENSG00000119729;ENSG00000177045;ENSG00000213626;ENSG00000134986;ENSG00000243414;ENSG00000101109;ENSG00000140718;ENSG00000166225;ENSG00000110330;ENSG00000145012;ENSG00000139112…	28	93	6208	17212	0.906066
GO:0005743	mitochondrial inner membrane	cellular_component	6	ENSG00000127184	1	93	434	17212	0.90759
GO:0016032	viral process	biological_process	6	ENSG00000118260	1	93	448	17212	0.914511
GO:0008233	peptidase activity	molecular_function	5	ENSG00000103404	1	93	474	17212	0.926031
GO:0043066	negative regulation of apoptotic process	biological_process	9	ENSG00000110330	1	93	486	17212	0.930817
GO:0005829	cytosol	cellular_component	6	ENSG00000128585;ENSG00000168159;ENSG00000101109;ENSG00000119729;ENSG00000114439;ENSG00000170619;ENSG00000103037;ENSG00000275832;ENSG00000004139;ENSG00000182473;ENSG00000140563;ENSG00000173626;ENSG00000170776;ENSG00000139112;ENSG00000166225;ENSG00000110330;ENSG00000119523;ENSG00000145012;ENSG00000067225;ENSG00000117152	20	93	4792	17212	0.93411
GO:0005730	nucleolus	cellular_component	6	ENSG00000255154;ENSG00000198585	2	93	811	17212	0.937574
GO:0003723	RNA binding	molecular_function	6	ENSG00000135870;ENSG00000067225;ENSG00000198585;ENSG00000127804	4	93	1480	17212	0.963984
GO:0016787	hydrolase activity	molecular_function	4	ENSG00000197275;ENSG00000214517;ENSG00000198585;ENSG00000103404	4	93	1544	17212	0.972168
GO:0005576	extracellular region	cellular_component	3	ENSG00000184500;ENSG00000106819;ENSG00000158747;ENSG00000067225;ENSG00000239697	5	93	1864	17212	0.978124
GO:0005856	cytoskeleton	cellular_component	6	ENSG00000180834;ENSG00000139112	2	93	1284	17212	0.993814

## Sheet: SDF-1 vs NC_KEGG
pathway_id	pathway_name	Genes	S gene number	TS gene number	B gene number	TB gene number	pvalue
4922	Glucagon signaling pathway	ENSG00000186951;ENSG00000067225;ENSG00000118260	3	29	96	6755	0.00777733
4962	Vasopressin-regulated water reabsorption	ENSG00000111540;ENSG00000118260	2	29	39	6755	0.0119529
4064	NF-kappa B signaling pathway	ENSG00000243414;ENSG00000110330	2	29	87	6755	0.0531854
4928	Parathyroid hormone synthesis, secretion and action	ENSG00000118260;ENSG00000170776	2	29	101	6755	0.0692184
4931	Insulin resistance	ENSG00000186951;ENSG00000118260	2	29	101	6755	0.0692184
4714	Thermogenesis	ENSG00000118260;ENSG00000166225;ENSG00000127184	3	29	224	6755	0.069851
4668	TNF signaling pathway	ENSG00000110330;ENSG00000118260	2	29	104	6755	0.0728412
4614	Renin-angiotensin system	ENSG00000182220	1	29	21	6755	0.0865109
230	Purine metabolism	ENSG00000067225;ENSG00000198585	2	29	125	6755	0.0998057
4068	FoxO signaling pathway	ENSG00000139112;ENSG00000101109	2	29	127	6755	0.102506
4910	Insulin signaling pathway	ENSG00000182473;ENSG00000119729	2	29	128	6755	0.103864
4932	Non-alcoholic fatty liver disease (NAFLD)	ENSG00000127184;ENSG00000186951	2	29	143	6755	0.124812
4710	Circadian rhythm	ENSG00000118260	1	29	31	6755	0.125122
4136	Autophagy - other	ENSG00000139112	1	29	31	6755	0.125122
4215	Apoptosis - multiple species	ENSG00000110330	1	29	32	6755	0.128895
4217	Necroptosis	ENSG00000110330;ENSG00000243414	2	29	146	6755	0.129121
4621	NOD-like receptor signaling pathway	ENSG00000110330;ENSG00000139112	2	29	149	6755	0.133466
5152	Tuberculosis	ENSG00000111540;ENSG00000118260	2	29	150	6755	0.134922
5168	Herpes simplex virus 1 infection	ENSG00000159905;ENSG00000110330;ENSG00000189190;ENSG00000170100	4	29	466	6755	0.135929
5161	Hepatitis B	ENSG00000243414;ENSG00000118260	2	29	151	6755	0.136382
620	Pyruvate metabolism	ENSG00000067225	1	29	38	6755	0.151207
4930	Type II diabetes mellitus	ENSG00000067225	1	29	40	6755	0.158521
5167	Kaposi sarcoma-associated herpesvirus infection	ENSG00000118260;ENSG00000139112	2	29	170	6755	0.164766
3440	Homologous recombination	ENSG00000197275	1	29	42	6755	0.165774
5030	Cocaine addiction	ENSG00000118260	1	29	44	6755	0.172967
600	Sphingolipid metabolism	ENSG00000143418	1	29	44	6755	0.172967
4340	Hedgehog signaling pathway	ENSG00000143147	1	29	46	6755	0.180099
510	N-Glycan biosynthesis	ENSG00000119523	1	29	49	6755	0.190687
4024	cAMP signaling pathway	ENSG00000186951;ENSG00000118260	2	29	188	6755	0.192574
5203	Viral carcinogenesis	ENSG00000067225;ENSG00000118260	2	29	190	6755	0.195706
5016	Huntington disease	ENSG00000127184;ENSG00000118260	2	29	191	6755	0.197275
5163	Human cytomegalovirus infection	ENSG00000170776;ENSG00000118260	2	29	204	6755	0.217818
4612	Antigen processing and presentation	ENSG00000118260	1	29	58	6755	0.221665
4927	Cortisol synthesis and secretion	ENSG00000118260	1	29	59	6755	0.225035
4924	Renin secretion	ENSG00000118260	1	29	60	6755	0.228391
5031	Amphetamine addiction	ENSG00000118260	1	29	62	6755	0.235062
5230	Central carbon metabolism in cancer	ENSG00000067225	1	29	63	6755	0.238376
4014	Ras signaling pathway	ENSG00000111540;ENSG00000101109	2	29	218	6755	0.240174
4920	Adipocytokine signaling pathway	ENSG00000186951	1	29	64	6755	0.241677
10	Glycolysis / Gluconeogenesis	ENSG00000067225	1	29	64	6755	0.241677
4137	Mitophagy - animal	ENSG00000139112	1	29	64	6755	0.241677
5223	Non-small cell lung cancer	ENSG00000101109	1	29	65	6755	0.244964
4918	Thyroid hormone synthesis	ENSG00000118260	1	29	66	6755	0.248237
5133	Pertussis	ENSG00000243414	1	29	67	6755	0.251496
3320	PPAR signaling pathway	ENSG00000186951	1	29	67	6755	0.251496
4721	Synaptic vesicle cycle	ENSG00000079215	1	29	68	6755	0.254742
4260	Cardiac muscle contraction	ENSG00000127184	1	29	69	6755	0.257974
4610	Complement and coagulation cascades	ENSG00000184500	1	29	69	6755	0.257974
1524	Platinum drug resistance	ENSG00000110330	1	29	70	6755	0.261192
4911	Insulin secretion	ENSG00000118260	1	29	76	6755	0.280222
3018	RNA degradation	ENSG00000198585	1	29	77	6755	0.283347
4727	GABAergic synapse	ENSG00000139112	1	29	78	6755	0.286459
5146	Amoebiasis	ENSG00000111540	1	29	85	6755	0.307882
4211	Longevity regulating pathway	ENSG00000118260	1	29	86	6755	0.310891
4620	Toll-like receptor signaling pathway	ENSG00000243414	1	29	86	6755	0.310891
4350	TGF-beta signaling pathway	ENSG00000158747	1	29	89	6755	0.319843
5222	Small cell lung cancer	ENSG00000110330	1	29	91	6755	0.325748
4925	Aldosterone synthesis and secretion	ENSG00000118260	1	29	91	6755	0.325748
4713	Circadian entrainment	ENSG00000118260	1	29	93	6755	0.331604
5215	Prostate cancer	ENSG00000118260	1	29	95	6755	0.337411
4916	Melanogenesis	ENSG00000118260	1	29	96	6755	0.340296
4725	Cholinergic synapse	ENSG00000118260	1	29	104	6755	0.362945
5145	Toxoplasmosis	ENSG00000110330	1	29	104	6755	0.362945
5200	Pathways in cancer	ENSG00000101109;ENSG00000139679;ENSG00000110330	3	29	499	6755	0.363184
4380	Osteoclast differentiation	ENSG00000118260	1	29	107	6755	0.371243
4724	Glutamatergic synapse	ENSG00000079215	1	29	108	6755	0.373986
5165	Human papillomavirus infection	ENSG00000118260;ENSG00000067225	2	29	312	6755	0.390112
4152	AMPK signaling pathway	ENSG00000118260	1	29	115	6755	0.392864
4071	Sphingolipid signaling pathway	ENSG00000143418	1	29	115	6755	0.392864
4722	Neurotrophin signaling pathway	ENSG00000166225	1	29	116	6755	0.395516
4151	PI3K-Akt signaling pathway	ENSG00000118260;ENSG00000139679	2	29	320	6755	0.402475
4915	Estrogen signaling pathway	ENSG00000118260	1	29	123	6755	0.413767
4140	Autophagy - animal	ENSG00000139112	1	29	124	6755	0.41633
4728	Dopaminergic synapse	ENSG00000118260	1	29	124	6755	0.41633
4926	Relaxin signaling pathway	ENSG00000118260	1	29	126	6755	0.421425
4514	Cell adhesion molecules (CAMs)	ENSG00000103855	1	29	130	6755	0.431485
190	Oxidative phosphorylation	ENSG00000127184	1	29	130	6755	0.431485
4371	Apelin signaling pathway	ENSG00000139112	1	29	132	6755	0.436452
4210	Apoptosis	ENSG00000110330	1	29	133	6755	0.43892
4261	Adrenergic signaling in cardiomyocytes	ENSG00000118260	1	29	135	6755	0.443824
4145	Phagosome	ENSG00000111540	1	29	135	6755	0.443824
4120	Ubiquitin mediated proteolysis	ENSG00000110330	1	29	136	6755	0.44626
5012	Parkinson disease	ENSG00000127184	1	29	136	6755	0.44626
4072	Phospholipase D signaling pathway	ENSG00000139679	1	29	138	6755	0.451102
5160	Hepatitis C	ENSG00000186951	1	29	140	6755	0.455903
4934	Cushing syndrome	ENSG00000118260	1	29	145	6755	0.467729
4390	Hippo signaling pathway	ENSG00000110330	1	29	149	6755	0.477011
4022	cGMP-PKG signaling pathway	ENSG00000118260	1	29	156	6755	0.492879
5010	Alzheimer disease	ENSG00000127184	1	29	164	6755	0.510445
5034	Alcoholism	ENSG00000118260	1	29	168	6755	0.519006
4020	Calcium signaling pathway	ENSG00000175938	1	29	174	6755	0.531578
5205	Proteoglycans in cancer	ENSG00000166225	1	29	191	6755	0.565498
4510	Focal adhesion	ENSG00000110330	1	29	193	6755	0.569329
5166	Human T-cell leukemia virus 1 infection	ENSG00000118260	1	29	205	6755	0.59164
4060	Cytokine-cytokine receptor interaction	ENSG00000239697	1	29	232	6755	0.637834
4144	Endocytosis	ENSG00000111540	1	29	237	6755	0.645816
4080	Neuroactive ligand-receptor interaction	ENSG00000139679	1	29	259	6755	0.678963
4010	MAPK signaling pathway	ENSG00000101109	1	29	278	6755	0.705162

## Sheet: EX-4 vs NC_GO
GO_ID	GO_Term	GO_function	GO_class	Genes	S gene number	TS gene number	B gene number	TB gene number	pvalue
GO:0000786	nucleosome	cellular_component	5	Gene5870;Gene8461;Gene2740;Gene6146;Gene4275;Gene7432;Gene7623;Gene4735;Gene5734;Gene9975;Gene505;Gene4959;Gene7198;Gene5610;Gene9387;Gene8566;Gene4689;Gene7037;Gene193;Gene2809	20	273	40	5227	4.44089e-16
GO:0046982	protein heterodimerization activity	molecular_function	6	Gene7432;Gene4735;Gene5870;Gene4275;Gene193;Gene5610;Gene7623;Gene6146;Gene7037;Gene4689;Gene9387;Gene5138;Gene7198;Gene5734;Gene2740;Gene505;Gene2809;Gene4959;Gene8461;Gene9975	20	273	43	5227	3.77476e-15
GO:0003677	DNA binding	molecular_function	6	Gene2809;Gene193;Gene3597;Gene7198;Gene4959;Gene7023;Gene1615;Gene1714;Gene5333;Gene7432;Gene4689;Gene5870;Gene5598;Gene9704;Gene9033;Gene9975;Gene2677;Gene7554;Gene6146;Gene7685;Gene5217;Gene1282;Gene8566;Gene5084;Gene9387;Gene1735;Gene2852;Gene6001;Gene505;Gene9637;Gene4275;Gene6631;Gene2442;Gene2740;Gene8461;Gene4735;Gene7037;Gene5610;Gene7668;Gene5734;Gene2269;Gene6494;Gene299;Gene7623;Gene87…	47	273	347	5227	5.42485e-10
GO:0005634	nucleus	cellular_component	6	Gene505;Gene6978;Gene4276;Gene5598;Gene1714;Gene1974;Gene9637;Gene416;Gene8566;Gene193;Gene7623;Gene9704;Gene4689;Gene5734;Gene4275;Gene7432;Gene4959;Gene7198;Gene7052;Gene2852;Gene6146;Gene1735;Gene7685;Gene2740;Gene6631;Gene5779;Gene5084;Gene9062;Gene581;Gene2677;Gene8461	31	273	216	5227	1.73993e-07
GO:0006629	lipid metabolic process	biological_process	5	Gene5584;Gene6652;Gene3499;Gene5860;Gene7411;Gene7948;Gene6180;Gene6247;Gene7832;Gene6722;Gene2110;Gene8303;Gene4554	13	273	51	5227	1.28845e-06
GO:0020037	heme binding	molecular_function	6	Gene7552;Gene5118;Gene7240;Gene6258;Gene9743;Gene6081;Gene5205;Gene7851;Gene6410;Gene8167;Gene6439;Gene8824;Gene6660;Gene5119;Gene6449	15	273	81	5227	1.43811e-05
GO:0005506	iron ion binding	molecular_function	8	Gene3523;Gene6258;Gene5119;Gene2612;Gene6439;Gene7328;Gene7552;Gene5205;Gene9743;Gene6609;Gene6449;Gene8167;Gene6410;Gene7851;Gene5118	15	273	86	5227	3.03598e-05
GO:0016705	oxidoreductase activity, acting on paired donors, with incorporation or reduction of molecular oxygen	molecular_function	5	Gene6258;Gene6410;Gene6449;Gene7851;Gene7552;Gene5119;Gene5118;Gene9743;Gene6439;Gene8167;Gene5205	11	273	52	5227	5.7282e-05
GO:0055114	oxidation-reduction process	biological_process	4	Gene6913;Gene4846;Gene7851;Gene6333;Gene6341;Gene3045;Gene5119;Gene7240;Gene6449;Gene6410;Gene1963;Gene3523;Gene7328;Gene6609;Gene8824;Gene8167;Gene3631;Gene5584;Gene6660;Gene6258;Gene6081;Gene5118;Gene936;Gene7091;Gene6104;Gene2612;Gene5205;Gene9738;Gene8617;Gene7552;Gene9743;Gene1832;Gene6439	33	273	337	5227	0.000280358
GO:0046983	protein dimerization activity	molecular_function	5	Gene4111;Gene9573;Gene5071;Gene8346;Gene1282;Gene8471;Gene5649;Gene9704;Gene581;Gene2413	10	273	64	5227	0.0015813
GO:0016788	hydrolase activity, acting on ester bonds	molecular_function	5	Gene7832;Gene7948;Gene6722;Gene8303;Gene6652	5	273	19	5227	0.00237787
GO:0006979	response to oxidative stress	biological_process	5	Gene7240;Gene6081;Gene8824;Gene6341;Gene6660	5	273	19	5227	0.00237787
GO:0005215	transporter activity	molecular_function	3	Gene1034;Gene173;Gene7114;Gene6914;Gene9506;Gene8696;Gene7960;Gene3754;Gene1939	9	273	59	5227	0.00318456
GO:0006310	DNA recombination	biological_process	8	Gene7685;Gene5779;Gene2677	3	273	8	5227	0.00648606
GO:0048544	recognition of pollen	biological_process	5	Gene4334;Gene2351	2	273	3	5227	0.00787315
GO:0004601	peroxidase activity	molecular_function	4	Gene7240;Gene6660;Gene8824;Gene6081	4	273	16	5227	0.00804326
GO:0004857	enzyme inhibitor activity	molecular_function	5	Gene6697;Gene327;Gene6671;Gene3938	4	273	16	5227	0.00804326
GO:0006334	nucleosome assembly	biological_process	7	Gene6146;Gene8566;Gene4689;Gene4959	4	273	16	5227	0.00804326
GO:0008171	O-methyltransferase activity	molecular_function	7	Gene1917;Gene5071;Gene9573	3	273	9	5227	0.00935684
GO:0016787	hydrolase activity	molecular_function	4	Gene4521;Gene8722;Gene9098;Gene7922;Gene2541;Gene2703;Gene8905;Gene5708;Gene9560;Gene9410;Gene8575	11	273	99	5227	0.0135377
GO:0006281	DNA repair	biological_process	8	Gene7685;Gene5779;Gene2677;Gene1735;Gene9637	5	273	28	5227	0.0136822
GO:0003700	DNA-binding transcription factor activity	molecular_function	4	Gene8729;Gene3348;Gene9033;Gene9062;Gene299;Gene3836;Gene5807;Gene9704;Gene5084;Gene5598;Gene2852;Gene6494	12	273	114	5227	0.0151883
GO:0051726	regulation of cell cycle	biological_process	6	Gene416;Gene6978	2	273	4	5227	0.0152042
GO:0019901	protein kinase binding	molecular_function	7	Gene6978;Gene9682;Gene416	3	273	11	5227	0.0170054
GO:0000079	regulation of cyclin-dependent protein serine/threonine kinase activity	biological_process	12	Gene416;Gene6978;Gene9682	3	273	11	5227	0.0170054
GO:0005576	extracellular region	cellular_component	3	Gene1035;Gene4335;Gene4096	3	273	11	5227	0.0170054
GO:0022857	transmembrane transporter activity	molecular_function	4	Gene9506;Gene7352;Gene1034;Gene5793	4	273	21	5227	0.021545
GO:0006950	response to stress	biological_process	4	Gene63;Gene5932;Gene3704;Gene1099;Gene2138	5	273	32	5227	0.0236688
GO:0003682	chromatin binding	molecular_function	4	Gene9267;Gene2442;Gene5333;Gene3597;Gene7668;Gene6001;Gene2269;Gene5217	8	273	68	5227	0.0242729
GO:0009607	response to biotic stimulus	biological_process	4	Gene6252;Gene1624	2	273	5	5227	0.0244717
GO:0006633	fatty acid biosynthetic process	biological_process	10	Gene6609;Gene9552;Gene7328;Gene2612;Gene6796;Gene5324	6	273	44	5227	0.0254877
GO:0008152	metabolic process	biological_process	3	Gene9098;Gene5324;Gene8575;Gene7411;Gene9992;Gene6615;Gene8339;Gene5662;Gene4846;Gene8617;Gene3304;Gene9552;Gene3068;Gene9410;Gene5660;Gene6796;Gene5947;Gene3306;Gene4521;Gene5708;Gene2703;Gene562	22	273	272	5227	0.0257771
GO:0006952	defense response	biological_process	5	Gene1945;Gene6252;Gene1624	3	273	13	5227	0.0272844
GO:0016706	2-oxoglutarate-dependent dioxygenase activity	molecular_function	6	Gene936;Gene3523;Gene9738	3	273	13	5227	0.0272844
GO:0016747	transferase activity, transferring acyl groups other than amino-acyl groups	molecular_function	6	Gene9552;Gene8777;Gene6796;Gene5324	4	273	23	5227	0.0293825
GO:0030599	pectinesterase activity	molecular_function	7	Gene6671;Gene6697;Gene3938;Gene327	4	273	23	5227	0.0293825
GO:0006260	DNA replication	biological_process	8	Gene2677;Gene5779;Gene7685	3	273	16	5227	0.0476176
GO:0006801	superoxide metabolic process	biological_process	6	Gene7091;Gene6913	2	273	7	5227	0.0479508
GO:0008610	lipid biosynthetic process	biological_process	6	Gene6796;Gene5324	2	273	7	5227	0.0479508
GO:0006869	lipid transport	biological_process	7	Gene8432;Gene8302	2	273	7	5227	0.0479508
GO:0046080	dUTP metabolic process	biological_process	11	Gene8722	1	273	1	5227	0.0522288
GO:0006333	chromatin assembly or disassembly	biological_process	6	Gene1974	1	273	1	5227	0.0522288
GO:0006021	inositol biosynthetic process	biological_process	8	Gene5791	1	273	1	5227	0.0522288
GO:0008987	quinolinate synthetase A activity	molecular_function	6	Gene4838	1	273	1	5227	0.0522288
GO:0080019	fatty-acyl-CoA reductase (alcohol-forming) activity	molecular_function	7	Gene5348	1	273	1	5227	0.0522288
GO:0016462	pyrophosphatase activity	molecular_function	7	Gene6659	1	273	1	5227	0.0522288
GO:0006177	GMP biosynthetic process	biological_process	12	Gene6659	1	273	1	5227	0.0522288
GO:0004435	phosphatidylinositol phospholipase C activity	molecular_function	9	Gene4554	1	273	1	5227	0.0522288
GO:0006816	calcium ion transport	biological_process	10	Gene9502	1	273	1	5227	0.0522288
GO:0009228	thiamine biosynthetic process	biological_process	8	Gene1497	1	273	1	5227	0.0522288
GO:0004512	inositol-3-phosphate synthase activity	molecular_function	6	Gene5791	1	273	1	5227	0.0522288
GO:0004097	catechol oxidase activity	molecular_function	7	Gene8617	1	273	1	5227	0.0522288
GO:0035556	intracellular signal transduction	biological_process	5	Gene4554	1	273	1	5227	0.0522288
GO:0019953	sexual reproduction	biological_process	4	Gene1035	1	273	1	5227	0.0522288
GO:0015369	calcium:proton antiporter activity	molecular_function	12	Gene9502	1	273	1	5227	0.0522288
GO:0006857	oligopeptide transport	biological_process	9	Gene173	1	273	1	5227	0.0522288
GO:0046148	pigment biosynthetic process	biological_process	5	Gene8617	1	273	1	5227	0.0522288
GO:0003922	GMP synthase (glutamine-hydrolyzing) activity	molecular_function	7	Gene6659	1	273	1	5227	0.0522288
GO:0055085	transmembrane transport	biological_process	6	Gene9506;Gene5588;Gene1034;Gene5793;Gene4636;Gene1573;Gene8745;Gene375;Gene1500;Gene9502;Gene1389	11	273	122	5227	0.0527826
GO:0016020	membrane	cellular_component	3	Gene2702;Gene6914;Gene1807;Gene7960;Gene5324;Gene2967;Gene3895;Gene4040;Gene1034;Gene3507;Gene1573;Gene3313;Gene7352;Gene9552;Gene7114;Gene4636;Gene8696;Gene173;Gene1939;Gene9506;Gene592;Gene7776;Gene6796	23	273	331	5227	0.0951444
GO:0006817	phosphate ion transport	biological_process	9	Gene5793	1	273	2	5227	0.101739
GO:0016730	oxidoreductase activity, acting on iron-sulfur proteins as donors	molecular_function	5	Gene3631	1	273	2	5227	0.101739
GO:0008083	growth factor activity	molecular_function	7	Gene4335	1	273	2	5227	0.101739
GO:0008654	phospholipid biosynthetic process	biological_process	8	Gene5791	1	273	2	5227	0.101739
GO:0016049	cell growth	biological_process	4	Gene5125	1	273	2	5227	0.101739
GO:0004602	glutathione peroxidase activity	molecular_function	5	Gene6341	1	273	2	5227	0.101739
GO:0005315	inorganic phosphate transmembrane transporter activity	molecular_function	7	Gene5793	1	273	2	5227	0.101739
GO:0031225	anchored component of membrane	cellular_component	5	Gene5125	1	273	2	5227	0.101739
GO:0010215	cellulose microfibril organization	biological_process	7	Gene5125	1	273	2	5227	0.101739
GO:0008283	cell population proliferation	biological_process	3	Gene4335	1	273	2	5227	0.101739
GO:0016836	hydro-lyase activity	molecular_function	6	Gene5660	1	273	2	5227	0.101739
GO:0019419	sulfate reduction	biological_process	6	Gene4846	1	273	2	5227	0.101739
GO:0007076	mitotic chromosome condensation	biological_process	10	Gene4422	1	273	2	5227	0.101739
GO:0005667	transcription factor complex	cellular_component	4	Gene3348	1	273	2	5227	0.101739
GO:0004553	hydrolase activity, hydrolyzing O-glycosyl compounds	molecular_function	6	Gene9595;Gene3317;Gene3537;Gene3257;Gene1597	5	273	51	5227	0.125415
GO:0004190	aspartic-type endopeptidase activity	molecular_function	8	Gene6247;Gene2110;Gene89	3	273	24	5227	0.12728
GO:0005618	cell wall	cellular_component	5	Gene3317;Gene6697;Gene6671	3	273	24	5227	0.12728
GO:0006355	regulation of transcription, DNA-templated	biological_process	8	Gene2852;Gene9033;Gene5807;Gene6494;Gene581;Gene5598;Gene9062;Gene8729;Gene299;Gene3836;Gene3348;Gene7023;Gene7554;Gene9704;Gene5084	15	273	212	5227	0.140823
GO:0016746	transferase activity, transferring acyl groups	molecular_function	5	Gene3068;Gene6615	2	273	13	5227	0.145241
GO:0005199	structural constituent of cell wall	molecular_function	4	Gene9393	1	273	3	5227	0.148672
GO:0008324	cation transmembrane transporter activity	molecular_function	6	Gene9502	1	273	3	5227	0.148672
GO:0016598	protein arginylation	biological_process	9	Gene5700	1	273	3	5227	0.148672
GO:0022904	respiratory electron transport chain	biological_process	7	Gene3313	1	273	3	5227	0.148672
GO:0005819	spindle	cellular_component	6	Gene4635	1	273	3	5227	0.148672
GO:0004867	serine-type endopeptidase inhibitor activity	molecular_function	8	Gene2223	1	273	3	5227	0.148672
GO:0009916	alternative oxidase activity	molecular_function	7	Gene3045	1	273	3	5227	0.148672
GO:0005759	mitochondrial matrix	cellular_component	7	Gene7180	1	273	3	5227	0.148672
GO:0016743	carboxyl- or carbamoyltransferase activity	molecular_function	6	Gene6026	1	273	3	5227	0.148672
GO:0009269	response to desiccation	biological_process	6	Gene83	1	273	3	5227	0.148672
GO:0004057	arginyltransferase activity	molecular_function	7	Gene5700	1	273	3	5227	0.148672
GO:0043565	sequence-specific DNA binding	molecular_function	7	Gene5598;Gene5084;Gene2852;Gene5807;Gene3836;Gene5138	6	273	69	5227	0.149821
GO:0042545	cell wall modification	biological_process	7	Gene6671;Gene6697	2	273	14	5227	0.163878
GO:0030001	metal ion transport	biological_process	8	Gene9789;Gene9545;Gene7091	3	273	28	5227	0.177681
GO:0016491	oxidoreductase activity	molecular_function	4	Gene7328;Gene3306;Gene8617;Gene6609;Gene3304;Gene6333;Gene1832;Gene1963;Gene9738;Gene936;Gene6104;Gene3523;Gene2612	13	273	189	5227	0.187295
GO:0016758	transferase activity, transferring hexosyl groups	molecular_function	6	Gene8339;Gene562;Gene5947	3	273	29	5227	0.191046
GO:0004497	monooxygenase activity	molecular_function	5	Gene6439	1	273	4	5227	0.193162
GO:0006002	fructose 6-phosphate metabolic process	biological_process	7	Gene282	1	273	4	5227	0.193162
GO:0016671	oxidoreductase activity, acting on a sulfur group of donors, disulfide as acceptor	molecular_function	6	Gene4846	1	273	4	5227	0.193162
GO:0016702	oxidoreductase activity, acting on single donors with incorporation of molecular oxygen, incorporation of two atoms of oxygen	molecular_function	6	Gene6333	1	273	4	5227	0.193162
GO:2001070	starch binding	molecular_function	6	Gene4791	1	273	4	5227	0.193162
GO:0009415	response to water	biological_process	6	Gene63	1	273	4	5227	0.193162
GO:0051539	4 iron, 4 sulfur cluster binding	molecular_function	6	Gene5660;Gene4838	2	273	16	5227	0.202233
GO:0008081	phosphoric diester hydrolase activity	molecular_function	7	Gene4554	1	273	5	5227	0.235334
GO:0001522	pseudouridine synthesis	biological_process	10	Gene4760	1	273	5	5227	0.235334
GO:0005875	microtubule associated complex	cellular_component	4	Gene5295	1	273	5	5227	0.235334
GO:0015976	carbon utilization	biological_process	3	Gene1322	1	273	5	5227	0.235334
GO:0005544	calcium-dependent phospholipid binding	molecular_function	6	Gene5541	1	273	5	5227	0.235334
GO:0004707	MAP kinase activity	molecular_function	9	Gene9255	1	273	5	5227	0.235334
GO:0008762	UDP-N-acetylmuramate dehydrogenase activity	molecular_function	7	Gene1832	1	273	5	5227	0.235334
GO:0016841	ammonia-lyase activity	molecular_function	6	Gene3332	1	273	5	5227	0.235334
GO:0008652	cellular amino acid biosynthetic process	biological_process	9	Gene5660	1	273	5	5227	0.235334
GO:0016624	oxidoreductase activity, acting on the aldehyde or oxo group of donors, disulfide as acceptor	molecular_function	6	Gene9992	1	273	5	5227	0.235334
GO:0008289	lipid binding	molecular_function	4	Gene8432;Gene8302	2	273	19	5227	0.261219
GO:0004784	superoxide dismutase activity	molecular_function	4	Gene6913	1	273	6	5227	0.27531
GO:0006164	purine nucleotide biosynthetic process	biological_process	10	Gene6659	1	273	6	5227	0.27531
GO:0016810	hydrolase activity, acting on carbon-nitrogen (but not peptide) bonds	molecular_function	5	Gene8905	1	273	6	5227	0.27531
GO:0016614	oxidoreductase activity, acting on CH-OH group of donors	molecular_function	5	Gene1832	1	273	6	5227	0.27531
GO:0005089	Rho guanyl-nucleotide exchange factor activity	molecular_function	9	Gene5299	1	273	6	5227	0.27531
GO:0004089	carbonate dehydratase activity	molecular_function	7	Gene1322	1	273	6	5227	0.27531
GO:0009664	plant-type cell wall organization	biological_process	7	Gene4096	1	273	6	5227	0.27531
GO:0009435	NAD biosynthetic process	biological_process	10	Gene4838	1	273	7	5227	0.313203
GO:0006855	drug transmembrane transport	biological_process	7	Gene4636	1	273	7	5227	0.313203
GO:0015297	antiporter activity	molecular_function	7	Gene4636	1	273	7	5227	0.313203
GO:0003872	6-phosphofructokinase activity	molecular_function	8	Gene282	1	273	7	5227	0.313203
GO:0006073	cellular glucan metabolic process	biological_process	8	Gene3317	1	273	8	5227	0.349122
GO:0006812	cation transport	biological_process	7	Gene9502	1	273	8	5227	0.349122
GO:0016762	xyloglucan:xyloglucosyl transferase activity	molecular_function	8	Gene3317	1	273	8	5227	0.349122
GO:0009765	photosynthesis, light harvesting	biological_process	6	Gene4040;Gene1807	2	273	24	5227	0.359179
GO:0004386	helicase activity	molecular_function	9	Gene7052	1	273	9	5227	0.383169
GO:0016717	oxidoreductase activity, acting on paired donors, with oxidation of a pair of donors resulting in the reduction of molecular oxygen to two molecules of water	molecular_function	6	Gene5584	1	273	9	5227	0.383169
GO:0004650	polygalacturonase activity	molecular_function	7	Gene7732	1	273	9	5227	0.383169
GO:0004743	pyruvate kinase activity	molecular_function	7	Gene5304	1	273	9	5227	0.383169
GO:0005484	SNAP receptor activity	molecular_function	5	Gene7776	1	273	9	5227	0.383169
GO:0048046	apoplast	cellular_component	4	Gene3317	1	273	9	5227	0.383169
GO:0004185	serine-type carboxypeptidase activity	molecular_function	9	Gene1819	1	273	9	5227	0.383169
GO:0030955	potassium ion binding	molecular_function	8	Gene5304	1	273	9	5227	0.383169
GO:0006508	proteolysis	biological_process	7	Gene1819;Gene6247;Gene2110;Gene214;Gene9162;Gene89;Gene8559	7	273	116	5227	0.403323
GO:0016760	cellulose synthase (UDP-forming) activity	molecular_function	9	Gene3507	1	273	10	5227	0.41544
GO:0030246	carbohydrate binding	molecular_function	4	Gene453;Gene4791	2	273	27	5227	0.415774
GO:0046872	metal ion binding	molecular_function	6	Gene9789;Gene9545;Gene7091;Gene6495;Gene1735;Gene6333;Gene6913	7	273	118	5227	0.420736
GO:0009055	electron transfer activity	molecular_function	5	Gene9675;Gene2327;Gene1747	3	273	46	5227	0.434168
GO:0003993	acid phosphatase activity	molecular_function	8	Gene2541	1	273	11	5227	0.44603
GO:0005975	carbohydrate metabolic process	biological_process	5	Gene3537;Gene9595;Gene7732;Gene3317;Gene1597;Gene3257	6	273	104	5227	0.462015
GO:0004842	ubiquitin-protein transferase activity	molecular_function	6	Gene9637;Gene1735	2	273	30	5227	0.469766
GO:0030244	cellulose biosynthetic process	biological_process	11	Gene3507	1	273	12	5227	0.475024
GO:0008236	serine-type peptidase activity	molecular_function	6	Gene8559	1	273	12	5227	0.475024
GO:0016791	phosphatase activity	molecular_function	7	Gene5686	1	273	12	5227	0.475024
GO:0005198	structural molecule activity	molecular_function	3	Gene7184	1	273	12	5227	0.475024
GO:0045454	cell redox homeostasis	biological_process	5	Gene839;Gene4846;Gene2327	3	273	49	5227	0.4757
GO:0004252	serine-type endopeptidase activity	molecular_function	8	Gene9162;Gene214	2	273	31	5227	0.487096
GO:0004674	protein serine/threonine kinase activity	molecular_function	8	Gene1422;Gene609;Gene455;Gene9460;Gene453;Gene5442;Gene9255;Gene2351;Gene2926;Gene4215	10	273	184	5227	0.495881
GO:0016627	oxidoreductase activity, acting on the CH-CH group of donors	molecular_function	5	Gene3499	1	273	13	5227	0.502506
GO:0015035	protein disulfide oxidoreductase activity	molecular_function	7	Gene2327;Gene839	2	273	32	5227	0.50407
GO:0006810	transport	biological_process	5	Gene173;Gene7960;Gene1939;Gene6914;Gene7114;Gene8696	6	273	109	5227	0.508119
GO:0006096	glycolytic process	biological_process	10	Gene282;Gene5304	2	273	33	5227	0.520677
GO:0004672	protein kinase activity	molecular_function	7	Gene9255;Gene9460;Gene4824;Gene5442;Gene2351;Gene453;Gene5877;Gene609;Gene4215;Gene2926;Gene455;Gene3787;Gene1422	13	273	246	5227	0.524855
GO:0006352	DNA-templated transcription, initiation	biological_process	8	Gene4689	1	273	14	5227	0.528554
GO:0006520	cellular amino acid metabolic process	biological_process	8	Gene6026	1	273	14	5227	0.528554
GO:0016226	iron-sulfur cluster assembly	biological_process	6	Gene7184	1	273	14	5227	0.528554
GO:0006468	protein phosphorylation	biological_process	9	Gene9460;Gene1422;Gene2926;Gene609;Gene5877;Gene453;Gene5442;Gene9255;Gene455;Gene4824;Gene3787;Gene4215;Gene2351	13	273	248	5227	0.53701
GO:0042254	ribosome biogenesis	biological_process	6	Gene4760	1	273	16	5227	0.576644
GO:0051536	iron-sulfur cluster binding	molecular_function	5	Gene7184;Gene1497	2	273	37	5227	0.583305
GO:0016887	ATPase activity	molecular_function	9	Gene3895;Gene592	2	273	38	5227	0.597993
GO:0016597	amino acid binding	molecular_function	7	Gene6026	1	273	17	5227	0.598823
GO:0006662	glycerol ether metabolic process	biological_process	6	Gene839	1	273	18	5227	0.619845
GO:0005874	microtubule	cellular_component	7	Gene4635	1	273	18	5227	0.619845
GO:0007017	microtubule-based process	biological_process	4	Gene5295	1	273	19	5227	0.639769
GO:0016772	transferase activity, transferring phosphorus-containing groups	molecular_function	5	Gene2351;Gene455;Gene453;Gene9460;Gene4215;Gene3787;Gene5877;Gene1422;Gene5442;Gene609;Gene2926;Gene9255;Gene4824	13	273	277	5227	0.69818
GO:0008168	methyltransferase activity	molecular_function	6	Gene9573;Gene5071	2	273	46	5227	0.701586
GO:0006351	transcription, DNA-templated	biological_process	8	Gene6631;Gene5084	2	273	50	5227	0.744523
GO:0050660	flavin adenine dinucleotide binding	molecular_function	6	Gene1832	1	273	31	5227	0.811344
GO:0007165	signal transduction	biological_process	4	Gene4554;Gene2926	2	273	58	5227	0.814703
GO:0009058	biosynthetic process	biological_process	4	Gene3332;Gene3592	2	273	58	5227	0.814703
GO:0016021	integral component of membrane	cellular_component	5	Gene5588;Gene1939;Gene5793;Gene1500;Gene3754;Gene9502;Gene1034;Gene7352;Gene3499;Gene9506;Gene375	11	273	264	5227	0.82381
GO:0003899	DNA-directed 5'-3' RNA polymerase activity	molecular_function	9	Gene6631	1	273	34	5227	0.83955
GO:0000287	magnesium ion binding	molecular_function	7	Gene5304	1	273	37	5227	0.863553
GO:0005509	calcium ion binding	molecular_function	7	Gene5541;Gene4978;Gene8507	3	273	92	5227	0.867257
GO:0016192	vesicle-mediated transport	biological_process	6	Gene7776	1	273	38	5227	0.87073
GO:0008270	zinc ion binding	molecular_function	8	Gene8029;Gene6872;Gene9560;Gene7940;Gene9843;Gene4276;Gene9138;Gene6631;Gene6130;Gene1735;Gene9637;Gene6104;Gene1322	13	273	323	5227	0.872995
GO:0030170	pyridoxal phosphate binding	molecular_function	6	Gene3592	1	273	42	5227	0.895868
GO:0051082	unfolded protein binding	molecular_function	5	Gene3704	1	273	47	5227	0.920552
GO:0003924	GTPase activity	molecular_function	9	Gene8029;Gene2186	2	273	79	5227	0.924217
GO:0005525	GTP binding	molecular_function	8	Gene983;Gene8029;Gene2186	3	273	120	5227	0.954835
GO:0003824	catalytic activity	molecular_function	3	Gene3592;Gene6796;Gene5304;Gene5324;Gene4846;Gene7122;Gene1832;Gene9560;Gene3332;Gene4791;Gene9552;Gene3537	12	273	348	5227	0.958761
GO:0005488	binding	molecular_function	3	Gene3053;Gene5307;Gene4422	3	273	125	5227	0.96312
GO:0006457	protein folding	biological_process	4	Gene3704	1	273	70	5227	0.977192
GO:0005524	ATP binding	molecular_function	5	Gene9460;Gene592;Gene453;Gene4215;Gene282;Gene7052;Gene5877;Gene4824;Gene1422;Gene2351;Gene3787;Gene6659;Gene455;Gene3895;Gene2926;Gene352;Gene609;Gene3704;Gene9255;Gene5442	20	273	565	5227	0.981683
GO:0006886	intracellular protein transport	biological_process	10	Gene7776	1	273	97	5227	0.994768
GO:0003723	RNA binding	molecular_function	6	Gene983;Gene7052	2	273	157	5227	0.998084
GO:0005515	protein binding	molecular_function	4	Gene1422;Gene1598;Gene9843;Gene2768;Gene4554;Gene7663;Gene2562;Gene4828;Gene2409;Gene1735;Gene1013;Gene3787;Gene5146;Gene4664;Gene5099;Gene2482;Gene8835;Gene5877;Gene9138;Gene3034;Gene5686;Gene7940;Gene9637;Gene4264;Gene4523;Gene7776;Gene6333;Gene8137	28	273	845	5227	0.998432
GO:0005737	cytoplasm	cellular_component	5	Gene3499	1	273	147	5227	0.999665
GO:0003676	nucleic acid binding	molecular_function	5	Gene7685;Gene7052;Gene3357;Gene5779	4	273	290	5227	0.999894
GO:0000166	nucleotide binding	molecular_function	5	Gene3357	1	273	179	5227	0.999943
GO:0005622	intracellular	cellular_component	4	Gene6264;Gene983;Gene6872;Gene5138	4	273	315	5227	0.999967
GO:0006412	translation	biological_process	8	Gene2457;Gene6264	2	273	263	5227	0.999992
GO:0005840	ribosome	cellular_component	6	Gene6264	1	273	251	5227	0.999999
GO:0003735	structural constituent of ribosome	molecular_function	4	Gene6264	1	273	266	5227	1

## Sheet: EX-4 vs NC_KEGG
pathway_id	pathway_name	Genes	S gene number	TS gene number	B gene number	TB gene number	pvalue
945	Stilbenoid, diarylheptanoid and gingerol biosynthesis	Gene6449;Gene7552;Gene6258;Gene1917;Gene8777;Gene5205	6	214	26	4240	0.00151487
940	Phenylpropanoid biosynthesis	Gene5947;Gene3332;Gene1939;Gene5071;Gene1819;Gene8824;Gene7240;Gene8777;Gene1917;Gene562;Gene9545;Gene6104	12	214	89	4240	0.00151507
73	Cutin, suberine and wax biosynthesis	Gene5348;Gene6352;Gene1615;Gene2612	4	214	12	4240	0.00226648
950	Isoquinoline alkaloid biosynthesis	Gene2351;Gene2061;Gene4334;Gene8617	4	214	14	4240	0.0042317
760	Nicotinate and nicotinamide metabolism	Gene5708;Gene2703;Gene9098;Gene4838;Gene9410	5	214	24	4240	0.00604239
941	Flavonoid biosynthesis	Gene12;Gene936;Gene3523;Gene1917;Gene8777	5	214	24	4240	0.00604239
62	Fatty acid elongation	Gene3499;Gene7853;Gene5324;Gene6796;Gene9552	5	214	24	4240	0.00604239
903	Limonene and pinene degradation	Gene6449;Gene5205;Gene6258;Gene7552	4	214	16	4240	0.0071057
943	Isoflavonoid biosynthesis	Gene9573;Gene8575	2	214	3	4240	0.00735453
906	Carotenoid biosynthesis	Gene8339;Gene2338;Gene3306;Gene3304;Gene6410	5	214	32	4240	0.0206425
563	Glycosylphosphatidylinositol (GPI)-anchor biosynthesis	Gene1006;Gene9603;Gene3028;Gene3273	4	214	23	4240	0.0262302
410	beta-Alanine metabolism	Gene2351;Gene4334;Gene2061;Gene1963	4	214	24	4240	0.0302677
360	Phenylalanine metabolism	Gene2351;Gene2061;Gene1917;Gene4334;Gene3332	5	214	36	4240	0.0328602
350	Tyrosine metabolism	Gene8617;Gene4334;Gene2061;Gene2351	4	214	25	4240	0.0346522
960	Tropane, piperidine and pyridine alkaloid biosynthesis	Gene2061;Gene2351;Gene4334	3	214	16	4240	0.0436405
905	Brassinosteroid biosynthesis	Gene5119;Gene8167;Gene5118	3	214	17	4240	0.0510783
40	Pentose and glucuronate interconversions	Gene7732;Gene6671;Gene327;Gene3938;Gene3597;Gene6697;Gene9267	7	214	72	4240	0.0692378
660	C5-Branched dibasic acid metabolism	Gene5660;Gene5662	2	214	10	4240	0.0873567
4070	Phosphatidylinositol signaling system	Gene8461;Gene4978;Gene5734;Gene7651;Gene193	5	214	49	4240	0.0988104
290	Valine, leucine and isoleucine biosynthesis	Gene126;Gene5662;Gene5660	3	214	24	4240	0.117875
750	Vitamin B6 metabolism	Gene3348;Gene5598;Gene2852	3	214	24	4240	0.117875
480	Glutathione metabolism	Gene6081;Gene6660;Gene2562;Gene9387;Gene6341	5	214	52	4240	0.119632
280	Valine, leucine and isoleucine degradation	Gene9992;Gene3068;Gene126;Gene6615	4	214	38	4240	0.122564
500	Starch and sucrose metabolism	Gene327;Gene6697;Gene1939;Gene7091;Gene3938;Gene7732;Gene3507;Gene9267;Gene6671;Gene3537;Gene3597;Gene453;Gene9595;Gene1597	14	214	198	4240	0.124049
3430	Mismatch repair	Gene7685;Gene5779;Gene2677	3	214	25	4240	0.129223
51	Fructose and mannose metabolism	Gene7091;Gene4065;Gene7352;Gene2768;Gene282	5	214	56	4240	0.150296
4075	Plant hormone signal transduction	Gene4521;Gene2926;Gene5153;Gene2155;Gene2413;Gene5547;Gene9255;Gene4824;Gene581;Gene9033;Gene5649;Gene3317;Gene4111;Gene1422;Gene3787;Gene4223	16	214	241	4240	0.155664
4626	Plant-pathogen interaction	Gene609;Gene5442;Gene6494;Gene3704;Gene8973;Gene299;Gene5807;Gene455;Gene8461;Gene4215;Gene8507;Gene5734;Gene3814;Gene193;Gene4978;Gene7651	16	214	242	4240	0.159523
1040	Biosynthesis of unsaturated fatty acids	Gene3499;Gene5584;Gene7853	3	214	28	4240	0.165371
640	Propanoate metabolism	Gene9992;Gene3068;Gene6615	3	214	29	4240	0.178026
730	Thiamine metabolism	Gene1497	1	214	4	4240	0.187171
592	alpha-Linolenic acid metabolism	Gene5860;Gene6439	2	214	16	4240	0.191835
900	Terpenoid backbone biosynthesis	Gene6622;Gene6652;Gene6328	3	214	33	4240	0.23094
3420	Nucleotide excision repair	Gene9460;Gene7685;Gene5779;Gene2677;Gene8137	5	214	66	4240	0.238777
561	Glycerolipid metabolism	Gene7948;Gene6722;Gene7832;Gene7023	4	214	50	4240	0.244049
562	Inositol phosphate metabolism	Gene4554;Gene5791;Gene2768	3	214	34	4240	0.244609
1210	2-Oxocarboxylic acid metabolism	Gene5660;Gene5662;Gene126;Gene9682	4	214	51	4240	0.255247
260	Glycine, serine and threonine metabolism	Gene2061;Gene4334;Gene5295;Gene2351	4	214	53	4240	0.27794
3030	DNA replication	Gene2677;Gene5779;Gene7685	3	214	37	4240	0.286276
3440	Homologous recombination	Gene5779;Gene7685;Gene2677	3	214	38	4240	0.300309
4712	Circadian rhythm - plant	Gene5217;Gene7554;Gene5060;Gene5333	4	214	55	4240	0.300944
53	Ascorbate and aldarate metabolism	Gene6081;Gene9387;Gene6660	3	214	39	4240	0.314377
860	Porphyrin and chlorophyll metabolism	Gene6652;Gene2269;Gene2442	3	214	43	4240	0.37062
590	Arachidonic acid metabolism	Gene6341	1	214	9	4240	0.372845
230	Purine metabolism	Gene3257;Gene6631;Gene7091;Gene6659;Gene5304;Gene8905;Gene5877;Gene5138	8	214	138	4240	0.395685
600	Sphingolipid metabolism	Gene7328;Gene6609	2	214	27	4240	0.398848
196	Photosynthesis - antenna proteins	Gene4040;Gene1807	2	214	27	4240	0.398848
4120	Ubiquitin mediated proteolysis	Gene8137;Gene9843;Gene5024;Gene5117;Gene6130;Gene2955;Gene5060	7	214	120	4240	0.402996
591	Linoleic acid metabolism	Gene6333	1	214	10	4240	0.404566
909	Sesquiterpenoid and triterpenoid biosynthesis	Gene7851	1	214	10	4240	0.404566
908	Zeatin biosynthesis	Gene9743	1	214	11	4240	0.434689
3020	RNA polymerase	Gene5138;Gene3257;Gene6631	3	214	51	4240	0.47961
710	Carbon fixation in photosynthetic organisms	Gene2768;Gene4065;Gene2385;Gene7352	4	214	77	4240	0.550208
30	Pentose phosphate pathway	Gene7352;Gene4065;Gene282	3	214	59	4240	0.579054
630	Glyoxylate and dicarboxylate metabolism	Gene5295;Gene9682;Gene2385	3	214	59	4240	0.579054
10	Glycolysis / Gluconeogenesis	Gene5304;Gene7352;Gene282;Gene2768;Gene4065	5	214	101	4240	0.5836
1212	Fatty acid metabolism	Gene5584;Gene7853;Gene3499	3	214	61	4240	0.601992
52	Galactose metabolism	Gene9595;Gene282	2	214	41	4240	0.620996
510	N-Glycan biosynthesis	Gene3803	1	214	20	4240	0.645904
531	Glycosaminoglycan degradation	Gene7114	1	214	21	4240	0.663861
270	Cysteine and methionine metabolism	Gene126;Gene3592;Gene839;Gene9738	4	214	89	4240	0.665537
1230	Biosynthesis of amino acids	Gene5662;Gene9682;Gene7352;Gene839;Gene5304;Gene2768;Gene126;Gene282;Gene5660;Gene6026	10	214	218	4240	0.671176
770	Pantothenate and CoA biosynthesis	Gene126	1	214	22	4240	0.680911
4141	Protein processing in endoplasmic reticulum	Gene260;Gene6691;Gene9222;Gene773;Gene7260;Gene7626;Gene2016;Gene7940;Gene3704;Gene8471	10	214	220	4240	0.682431
240	Pyrimidine metabolism	Gene8722;Gene9560;Gene6631;Gene5138;Gene3257	5	214	113	4240	0.683118
3060	Protein export	Gene1282;Gene9704	2	214	47	4240	0.694955
910	Nitrogen metabolism	Gene1322	1	214	25	4240	0.727066
970	Aminoacyl-tRNA biosynthesis	Gene8729;Gene3045	2	214	52	4240	0.747153
4130	SNARE interactions in vesicular transport	Gene7776	1	214	28	4240	0.766571
920	Sulfur metabolism	Gene4846	1	214	30	4240	0.789691
3410	Base excision repair	Gene2346	1	214	30	4240	0.789691
564	Glycerophospholipid metabolism	Gene7922;Gene5860	2	214	57	4240	0.791528
100	Steroid biosynthesis	Gene1832	1	214	31	4240	0.800381
220	Arginine biosynthesis	Gene6026	1	214	31	4240	0.800381
330	Arginine and proline metabolism	Gene1963	1	214	32	4240	0.810531
2010	ABC transporters	Gene592	1	214	34	4240	0.829314
460	Cyanoamino acid metabolism	Gene1939	1	214	37	4240	0.85407
3022	Basal transcription factors	Gene9460	1	214	38	4240	0.8615
1200	Carbon metabolism	Gene282;Gene2385;Gene9682;Gene5304;Gene5295;Gene7352;Gene2768;Gene4065	8	214	216	4240	0.86373
20	Citrate cycle (TCA cycle)	Gene9682	1	214	42	4240	0.88764
3008	Ribosome biogenesis in eukaryotes	Gene2482;Gene5742;Gene5390	3	214	107	4240	0.913716
4146	Peroxisome	Gene6913;Gene5348	2	214	84	4240	0.931385
520	Amino sugar and nucleotide sugar metabolism	Gene1597;Gene3507	2	214	95	4240	0.957452
620	Pyruvate metabolism	Gene5304	1	214	61	4240	0.958512
3050	Proteasome	Gene352	1	214	63	4240	0.962653
195	Photosynthesis	Gene5299	1	214	71	4240	0.975488
190	Oxidative phosphorylation	Gene2442;Gene2269;Gene3895	3	214	144	4240	0.979751
4144	Endocytosis	Gene7626;Gene214;Gene4605;Gene2186	4	214	197	4240	0.991695
3010	Ribosome	Gene3580;Gene9805;Gene6264;Gene8835;Gene9860;Gene8652;Gene340;Gene2457	8	214	325	4240	0.994714
3040	Spliceosome	Gene3357;Gene6001;Gene7626;Gene7052	4	214	213	4240	0.995653
3015	mRNA surveillance pathway	Gene2950;Gene8029	2	214	145	4240	0.995691
3013	RNA transport	Gene5390;Gene1009;Gene3891	3	214	215	4240	0.999078
3018	RNA degradation	Gene282	1	214	145	4240	0.999521

## Sheet: SDF-1+EX-4 vs NC_GO
GO_ID	GO_Term	GO_function	GO_class	Genes	S gene number	TS gene number	B gene number	TB gene number	pvalue
GO:0043486	histone exchange	biological_process	7	ENSG00000282034;ENSG00000143401	2	102	9	17212	0.00121844
GO:0001759	organ induction	biological_process	9	ENSG00000166225;ENSG00000126778	2	102	11	17212	0.00184716
GO:0035988	chondrocyte proliferation	biological_process	4	ENSG00000162733;ENSG00000248592	2	102	12	17212	0.00220803
GO:0000812	Swr1 complex	cellular_component	8	ENSG00000143401;ENSG00000282034	2	102	12	17212	0.00220803
GO:0050678	regulation of epithelial cell proliferation	biological_process	7	ENSG00000126778;ENSG00000166225	2	102	15	17212	0.00347232
GO:2000103	positive regulation of mammary stem cell proliferation	biological_process	8	ENSG00000213626	1	102	1	17212	0.0059261
GO:0016803	ether hydrolase activity	molecular_function	6	ENSG00000180089	1	102	1	17212	0.0059261
GO:1902307	positive regulation of sodium ion transmembrane transport	biological_process	11	ENSG00000143761	1	102	1	17212	0.0059261
GO:0055108	Golgi to transport vesicle transport	biological_process	7	ENSG00000143761	1	102	1	17212	0.0059261
GO:1905243	cellular response to 3,3',5-triiodo-L-thyronine	biological_process	8	ENSG00000126778	1	102	1	17212	0.0059261
GO:1990583	phospholipase D activator activity	molecular_function	8	ENSG00000143761	1	102	1	17212	0.0059261
GO:0008297	single-stranded DNA exodeoxyribonuclease activity	molecular_function	10	ENSG00000125871	1	102	1	17212	0.0059261
GO:0097212	lysosomal membrane organization	biological_process	6	ENSG00000143761	1	102	1	17212	0.0059261
GO:0070142	synaptic vesicle budding	biological_process	8	ENSG00000143761	1	102	1	17212	0.0059261
GO:0036313	phosphatidylinositol 3-kinase catalytic subunit binding	molecular_function	7	ENSG00000100100	1	102	1	17212	0.0059261
GO:0014857	regulation of skeletal muscle cell proliferation	biological_process	7	ENSG00000126778	1	102	1	17212	0.0059261
GO:0072172	mesonephric tubule formation	biological_process	9	ENSG00000126778	1	102	1	17212	0.0059261
GO:1904677	positive regulation of somatic stem cell division	biological_process	8	ENSG00000213626	1	102	1	17212	0.0059261
GO:0061842	microtubule organizing center localization	biological_process	4	ENSG00000162704	1	102	1	17212	0.0059261
GO:0033275	actin-myosin filament sliding	biological_process	7	ENSG00000159251	1	102	1	17212	0.0059261
GO:1990386	mitotic cleavage furrow ingression	biological_process	7	ENSG00000143761	1	102	1	17212	0.0059261
GO:0039552	RIG-I binding	molecular_function	6	ENSG00000129657	1	102	1	17212	0.0059261
GO:0005776	autophagosome	cellular_component	7	ENSG00000089063;ENSG00000139112;ENSG00000131374	3	102	64	17212	0.00647997
GO:0031214	biomineral tissue development	biological_process	6	ENSG00000106819;ENSG00000162733	2	102	26	17212	0.010302
GO:0015629	actin cytoskeleton	cellular_component	7	ENSG00000162704;ENSG00000090612;ENSG00000173210;ENSG00000162733;ENSG00000211455	5	102	223	17212	0.010532
GO:1904674	positive regulation of somatic stem cell population maintenance	biological_process	8	ENSG00000213626	1	102	2	17212	0.0118174
GO:0047409	alkenylglycerophosphoethanolamine hydrolase activity	molecular_function	7	ENSG00000180089	1	102	2	17212	0.0118174
GO:1903725	regulation of phospholipid metabolic process	biological_process	8	ENSG00000143761	1	102	2	17212	0.0118174
GO:0002537	nitric oxide production involved in inflammatory response	biological_process	5	ENSG00000003989	1	102	2	17212	0.0118174
GO:0030549	acetylcholine receptor activator activity	molecular_function	6	ENSG00000204422	1	102	2	17212	0.0118174
GO:1902824	positive regulation of late endosome to lysosome transport	biological_process	9	ENSG00000143761	1	102	2	17212	0.0118174
GO:0019323	pentose catabolic process	biological_process	8	ENSG00000197713	1	102	2	17212	0.0118174
GO:1902023	L-arginine transport	biological_process	12	ENSG00000003989	1	102	2	17212	0.0118174
GO:0042643	actomyosin, actin portion	cellular_component	8	ENSG00000159251	1	102	2	17212	0.0118174
GO:0033633	negative regulation of cell-cell adhesion mediated by integrin	biological_process	8	ENSG00000060237	1	102	2	17212	0.0118174
GO:1900924	negative regulation of glycine import across plasma membrane	biological_process	8	ENSG00000117152	1	102	2	17212	0.0118174
GO:0048534	hematopoietic or lymphoid organ development	biological_process	6	ENSG00000171456	1	102	2	17212	0.0118174
GO:0000248	C-5 sterol desaturase activity	molecular_function	7	ENSG00000109929	1	102	2	17212	0.0118174
GO:0061197	fungiform papilla morphogenesis	biological_process	5	ENSG00000126778	1	102	2	17212	0.0118174
GO:0033484	nitric oxide homeostasis	biological_process	8	ENSG00000101126	1	102	2	17212	0.0118174
GO:0061459	L-arginine transmembrane transporter activity	molecular_function	9	ENSG00000003989	1	102	2	17212	0.0118174
GO:0097022	lymphocyte migration into lymph node	biological_process	7	ENSG00000060237	1	102	2	17212	0.0118174
GO:0004382	guanosine-diphosphatase activity	molecular_function	9	ENSG00000171302	1	102	2	17212	0.0118174
GO:0047408	alkenylglycerophosphocholine hydrolase activity	molecular_function	7	ENSG00000180089	1	102	2	17212	0.0118174
GO:0006575	cellular modified amino acid metabolic process	biological_process	5	ENSG00000286112	1	102	2	17212	0.0118174
GO:0070171	negative regulation of tooth mineralization	biological_process	10	ENSG00000106819	1	102	2	17212	0.0118174
GO:0097020	COPII adaptor activity	molecular_function	4	ENSG00000258881	1	102	2	17212	0.0118174
GO:0004750	ribulose-phosphate 3-epimerase activity	molecular_function	7	ENSG00000197713	1	102	2	17212	0.0118174
GO:2000729	positive regulation of mesenchymal cell proliferation involved in ureter development	biological_process	9	ENSG00000126778	1	102	2	17212	0.0118174
GO:0050794	regulation of cellular process	biological_process	5	ENSG00000060237	1	102	2	17212	0.0118174
GO:0046619	optic placode formation involved in camera-type eye formation	biological_process	7	ENSG00000166225	1	102	2	17212	0.0118174
GO:0032776	DNA methylation on cytosine	biological_process	11	ENSG00000119772	1	102	2	17212	0.0118174
GO:0110053	regulation of actin filament organization	biological_process	8	ENSG00000117152	1	102	2	17212	0.0118174
GO:0038062	protein tyrosine kinase collagen receptor activity	molecular_function	10	ENSG00000162733	1	102	2	17212	0.0118174
GO:0070548	L-glutamine aminotransferase activity	molecular_function	7	ENSG00000286112	1	102	2	17212	0.0118174
GO:0050807	regulation of synapse organization	biological_process	7	ENSG00000138758;ENSG00000167552	2	102	28	17212	0.0118904
GO:0016788	hydrolase activity, acting on ester bonds	molecular_function	5	ENSG00000270181;ENSG00000272410	2	102	29	17212	0.0127222
GO:0045664	regulation of neuron differentiation	biological_process	9	ENSG00000134986;ENSG00000126778	2	102	29	17212	0.0127222
GO:0003281	ventricular septum development	biological_process	6	ENSG00000166225;ENSG00000015479	2	102	32	17212	0.0153648
GO:0005802	trans-Golgi network	cellular_component	7	ENSG00000089063;ENSG00000143761;ENSG00000085365;ENSG00000058063	4	102	164	17212	0.0164116
GO:1903352	L-ornithine transmembrane transport	biological_process	8	ENSG00000003989	1	102	3	17212	0.0176742
GO:0099629	postsynaptic specialization of symmetric synapse	cellular_component	5	ENSG00000138758	1	102	3	17212	0.0176742
GO:1903053	regulation of extracellular matrix organization	biological_process	7	ENSG00000162733	1	102	3	17212	0.0176742
GO:0072193	ureter smooth muscle cell differentiation	biological_process	8	ENSG00000126778	1	102	3	17212	0.0176742
GO:0047804	cysteine-S-conjugate beta-lyase activity	molecular_function	6	ENSG00000286112	1	102	3	17212	0.0176742
GO:0034315	regulation of Arp2/3 complex-mediated actin nucleation	biological_process	10	ENSG00000143761	1	102	3	17212	0.0176742
GO:0038116	chemokine (C-C motif) ligand 21 signaling pathway	biological_process	8	ENSG00000060237	1	102	3	17212	0.0176742
GO:0005956	protein kinase CK2 complex	cellular_component	4	ENSG00000263020	1	102	3	17212	0.0176742
GO:0044313	protein K6-linked deubiquitination	biological_process	10	ENSG00000135093	1	102	3	17212	0.0176742
GO:0031315	extrinsic component of mitochondrial outer membrane	cellular_component	6	ENSG00000004139	1	102	3	17212	0.0176742
GO:0021610	facial nerve morphogenesis	biological_process	6	ENSG00000126778	1	102	3	17212	0.0176742
GO:0003886	DNA (cytosine-5-)-methyltransferase activity	molecular_function	8	ENSG00000119772	1	102	3	17212	0.0176742
GO:0051128	regulation of cellular component organization	biological_process	6	ENSG00000211455	1	102	3	17212	0.0176742
GO:0098772	molecular function regulator	molecular_function	3	ENSG00000129657	1	102	3	17212	0.0176742
GO:0061055	myotome development	biological_process	5	ENSG00000126778	1	102	3	17212	0.0176742
GO:0060160	negative regulation of dopamine receptor signaling pathway	biological_process	10	ENSG00000117152	1	102	3	17212	0.0176742
GO:0043262	adenosine-diphosphatase activity	molecular_function	9	ENSG00000171302	1	102	3	17212	0.0176742
GO:0023016	signal transduction by trans-phosphorylation	biological_process	11	ENSG00000060237	1	102	3	17212	0.0176742
GO:0035359	negative regulation of peroxisome proliferator activated receptor signaling pathway	biological_process	9	ENSG00000171456	1	102	3	17212	0.0176742
GO:0072513	positive regulation of secondary heart field cardioblast proliferation	biological_process	11	ENSG00000126778	1	102	3	17212	0.0176742
GO:0070086	ubiquitin-dependent endocytosis	biological_process	8	ENSG00000214357	1	102	3	17212	0.0176742
GO:0030910	olfactory placode formation	biological_process	6	ENSG00000126778	1	102	3	17212	0.0176742
GO:0005250	A-type (transient outward) potassium channel activity	molecular_function	11	ENSG00000171385	1	102	3	17212	0.0176742
GO:0036123	histone H3-K9 dimethylation	biological_process	13	ENSG00000152455	1	102	3	17212	0.0176742
GO:0099625	ventricular cardiac muscle cell membrane repolarization	biological_process	10	ENSG00000171385	1	102	3	17212	0.0176742
GO:0005873	plus-end kinesin complex	cellular_component	6	ENSG00000165714	1	102	3	17212	0.0176742
GO:0097638	L-arginine import across plasma membrane	biological_process	13	ENSG00000003989	1	102	3	17212	0.0176742
GO:0097581	lamellipodium organization	biological_process	7	ENSG00000162704	1	102	3	17212	0.0176742
GO:0060830	ciliary receptor clustering involved in smoothened signaling pathway	biological_process	7	ENSG00000176101	1	102	3	17212	0.0176742
GO:0072095	regulation of branch elongation involved in ureteric bud branching	biological_process	7	ENSG00000126778	1	102	3	17212	0.0176742
GO:0000422	autophagy of mitochondrion	biological_process	7	ENSG00000139112;ENSG00000135093	2	102	36	17212	0.0192193
GO:0042220	response to cocaine	biological_process	6	ENSG00000117152;ENSG00000119772	2	102	37	17212	0.0202401
GO:0048487	beta-tubulin binding	molecular_function	7	ENSG00000139112;ENSG00000101126	2	102	38	17212	0.0212831
GO:0045471	response to ethanol	biological_process	6	ENSG00000159251;ENSG00000117152;ENSG00000119772	3	102	103	17212	0.0233178
GO:0044262	cellular carbohydrate metabolic process	biological_process	6	ENSG00000197713	1	102	4	17212	0.0234965
GO:0090116	C-5 methylation of cytosine	biological_process	12	ENSG00000119772	1	102	4	17212	0.0234965
GO:0035522	monoubiquitinated histone H2A deubiquitination	biological_process	12	ENSG00000171456	1	102	4	17212	0.0234965
GO:0015181	arginine transmembrane transporter activity	molecular_function	7	ENSG00000003989	1	102	4	17212	0.0234965
GO:0033489	cholesterol biosynthetic process via desmosterol	biological_process	10	ENSG00000109929	1	102	4	17212	0.0234965
GO:0016888	endodeoxyribonuclease activity, producing 5'-phosphomonoesters	molecular_function	9	ENSG00000272410	1	102	4	17212	0.0234965
GO:1990791	dorsal root ganglion development	biological_process	7	ENSG00000117152	1	102	4	17212	0.0234965
GO:0021769	orbitofrontal cortex development	biological_process	5	ENSG00000162704	1	102	4	17212	0.0234965
GO:0060011	Sertoli cell proliferation	biological_process	4	ENSG00000129473	1	102	4	17212	0.0234965
GO:0042036	negative regulation of cytokine biosynthetic process	biological_process	8	ENSG00000065802	1	102	4	17212	0.0234965
GO:0051400	BH domain binding	molecular_function	6	ENSG00000129473	1	102	4	17212	0.0234965
GO:0070252	actin-mediated cell contraction	biological_process	6	ENSG00000159251	1	102	4	17212	0.0234965
GO:0045134	uridine-diphosphatase activity	molecular_function	9	ENSG00000171302	1	102	4	17212	0.0234965
GO:0097061	dendritic spine organization	biological_process	6	ENSG00000143761	1	102	4	17212	0.0234965
GO:0046485	ether lipid metabolic process	biological_process	7	ENSG00000180089	1	102	4	17212	0.0234965
GO:0002029	desensitization of G protein-coupled receptor signaling pathway	biological_process	10	ENSG00000204422	1	102	4	17212	0.0234965
GO:0015189	L-lysine transmembrane transporter activity	molecular_function	7	ENSG00000003989	1	102	4	17212	0.0234965
GO:0033490	cholesterol biosynthetic process via lathosterol	biological_process	10	ENSG00000109929	1	102	4	17212	0.0234965
GO:0019211	phosphatase activator activity	molecular_function	6	ENSG00000166225	1	102	4	17212	0.0234965
GO:1902953	positive regulation of ER to Golgi vesicle-mediated transport	biological_process	9	ENSG00000143761	1	102	4	17212	0.0234965
GO:0072107	positive regulation of ureteric bud formation	biological_process	9	ENSG00000126778	1	102	4	17212	0.0234965
GO:0035517	PR-DUB complex	cellular_component	5	ENSG00000171456	1	102	4	17212	0.0234965
GO:0060235	lens induction in camera-type eye	biological_process	5	ENSG00000163349	1	102	4	17212	0.0234965
GO:0009008	DNA-methyltransferase activity	molecular_function	7	ENSG00000119772	1	102	4	17212	0.0234965
GO:0003839	gamma-glutamylcyclotransferase activity	molecular_function	7	ENSG00000281039	1	102	4	17212	0.0234965
GO:0048386	positive regulation of retinoic acid receptor signaling pathway	biological_process	9	ENSG00000171456	1	102	4	17212	0.0234965
GO:1905394	retromer complex binding	molecular_function	5	ENSG00000131374	1	102	4	17212	0.0234965
GO:0008582	regulation of synaptic growth at neuromuscular junction	biological_process	7	ENSG00000126778	1	102	5	17212	0.0292847
GO:0061551	trigeminal ganglion development	biological_process	8	ENSG00000126778	1	102	5	17212	0.0292847
GO:0070189	kynurenine metabolic process	biological_process	6	ENSG00000286112	1	102	5	17212	0.0292847
GO:0043504	mitochondrial DNA repair	biological_process	9	ENSG00000125871	1	102	5	17212	0.0292847
GO:0043045	DNA methylation involved in embryo development	biological_process	11	ENSG00000119772	1	102	5	17212	0.0292847
GO:0016212	kynurenine-oxoglutarate transaminase activity	molecular_function	8	ENSG00000286112	1	102	5	17212	0.0292847
GO:0036124	histone H3-K9 trimethylation	biological_process	13	ENSG00000152455	1	102	5	17212	0.0292847
GO:0015809	arginine transport	biological_process	8	ENSG00000003989	1	102	5	17212	0.0292847
GO:1903401	L-lysine transmembrane transport	biological_process	8	ENSG00000003989	1	102	5	17212	0.0292847
GO:0010715	regulation of extracellular matrix disassembly	biological_process	8	ENSG00000162733	1	102	5	17212	0.0292847
GO:0000064	L-ornithine transmembrane transporter activity	molecular_function	7	ENSG00000003989	1	102	5	17212	0.0292847
GO:0018812	3-hydroxyacyl-CoA dehydratase activity	molecular_function	7	ENSG00000255154	1	102	5	17212	0.0292847
GO:0043553	negative regulation of phosphatidylinositol 3-kinase activity	biological_process	10	ENSG00000100100	1	102	5	17212	0.0292847
GO:0015616	DNA translocase activity	molecular_function	12	ENSG00000197275	1	102	5	17212	0.0292847
GO:0060430	lung saccule development	biological_process	5	ENSG00000171456	1	102	5	17212	0.0292847
GO:0016857	racemase and epimerase activity, acting on carbohydrates and derivatives	molecular_function	6	ENSG00000197713	1	102	5	17212	0.0292847
GO:0015917	aminophospholipid transport	biological_process	9	ENSG00000058063	1	102	5	17212	0.0292847
GO:0090188	negative regulation of pancreatic juice secretion	biological_process	9	ENSG00000060237	1	102	5	17212	0.0292847
GO:0090131	mesenchyme migration	biological_process	5	ENSG00000159251	1	102	5	17212	0.0292847
GO:0048538	thymus development	biological_process	7	ENSG00000126778;ENSG00000171456	2	102	46	17212	0.0303931
GO:0012505	endomembrane system	cellular_component	4	ENSG00000145860;ENSG00000166225;ENSG00000143761	3	102	115	17212	0.0309525
GO:0005637	nuclear inner membrane	cellular_component	6	ENSG00000058063;ENSG00000015479	2	102	48	17212	0.0328731
GO:0055037	recycling endosome	cellular_component	8	ENSG00000058063;ENSG00000167552;ENSG00000089063	3	102	118	17212	0.0330426
GO:0060527	prostate epithelial cord arborization involved in prostate glandular acinus morphogenesis	biological_process	9	ENSG00000166225	1	102	6	17212	0.035039
GO:0072577	endothelial cell apoptotic process	biological_process	8	ENSG00000163349	1	102	6	17212	0.035039
GO:0010835	regulation of protein ADP-ribosylation	biological_process	9	ENSG00000101126	1	102	6	17212	0.035039
GO:0034448	EGO complex	cellular_component	7	ENSG00000280148	1	102	6	17212	0.035039
GO:0060059	embryonic retina morphogenesis in camera-type eye	biological_process	6	ENSG00000163349	1	102	6	17212	0.035039
GO:0007185	transmembrane receptor protein tyrosine phosphatase signaling pathway	biological_process	7	ENSG00000166225	1	102	6	17212	0.035039
GO:1903038	negative regulation of leukocyte cell-cell adhesion	biological_process	8	ENSG00000060237	1	102	6	17212	0.035039
GO:0097136	Bcl-2 family protein complex	cellular_component	4	ENSG00000129473	1	102	6	17212	0.035039
GO:0002090	regulation of receptor internalization	biological_process	7	ENSG00000143761	1	102	6	17212	0.035039
GO:0005168	neurotrophin TRKA receptor binding	molecular_function	9	ENSG00000166225	1	102	6	17212	0.035039
GO:0072075	metanephric mesenchyme development	biological_process	8	ENSG00000126778	1	102	6	17212	0.035039
GO:0032237	activation of store-operated calcium channel activity	biological_process	10	ENSG00000248592	1	102	6	17212	0.035039
GO:0009052	pentose-phosphate shunt, non-oxidative branch	biological_process	6	ENSG00000197713	1	102	6	17212	0.035039
GO:0015871	choline transport	biological_process	7	ENSG00000129657	1	102	6	17212	0.035039
GO:0014842	regulation of skeletal muscle satellite cell proliferation	biological_process	8	ENSG00000126778	1	102	6	17212	0.035039
GO:1901525	negative regulation of mitophagy	biological_process	11	ENSG00000135093	1	102	6	17212	0.035039
GO:0098574	cytoplasmic side of lysosomal membrane	cellular_component	7	ENSG00000165714	1	102	6	17212	0.035039
GO:0008595	anterior/posterior axis specification, embryo	biological_process	7	ENSG00000166225	1	102	6	17212	0.035039
GO:0019212	phosphatase inhibitor activity	molecular_function	6	ENSG00000143401	1	102	6	17212	0.035039
GO:0072384	organelle transport along microtubule	biological_process	9	ENSG00000165714	1	102	6	17212	0.035039
GO:0000287	magnesium ion binding	molecular_function	7	ENSG00000058063;ENSG00000060237;ENSG00000211455;ENSG00000143761	4	102	210	17212	0.0362821
GO:0061630	ubiquitin protein ligase activity	molecular_function	7	ENSG00000214357;ENSG00000065802;ENSG00000145860;ENSG00000145743	4	102	216	17212	0.0395819
GO:0035612	AP-2 adaptor complex binding	molecular_function	5	ENSG00000131374	1	102	7	17212	0.0407594
GO:0030011	maintenance of cell polarity	biological_process	5	ENSG00000162704	1	102	7	17212	0.0407594
GO:0014909	smooth muscle cell migration	biological_process	8	ENSG00000162704	1	102	7	17212	0.0407594
GO:2001014	regulation of skeletal muscle cell differentiation	biological_process	7	ENSG00000126778	1	102	7	17212	0.0407594
GO:0015174	basic amino acid transmembrane transporter activity	molecular_function	8	ENSG00000003989	1	102	7	17212	0.0407594
GO:0071599	otic vesicle development	biological_process	7	ENSG00000126778	1	102	7	17212	0.0407594
GO:0034128	negative regulation of MyD88-independent toll-like receptor signaling pathway	biological_process	8	ENSG00000004139	1	102	7	17212	0.0407594
GO:0009649	entrainment of circadian clock	biological_process	5	ENSG00000029153	1	102	7	17212	0.0407594
GO:0070307	lens fiber cell development	biological_process	7	ENSG00000166225	1	102	7	17212	0.0407594
GO:0003254	regulation of membrane depolarization	biological_process	6	ENSG00000022267	1	102	7	17212	0.0407594
GO:0000791	euchromatin	cellular_component	7	ENSG00000119772	1	102	7	17212	0.0407594
GO:0014033	neural crest cell differentiation	biological_process	7	ENSG00000145743	1	102	7	17212	0.0407594
GO:0034715	pICln-Sm protein complex	cellular_component	6	ENSG00000125743	1	102	7	17212	0.0407594
GO:0086008	voltage-gated potassium channel activity involved in cardiac muscle cell action potential repolarization	molecular_function	10	ENSG00000171385	1	102	7	17212	0.0407594
GO:1990446	U1 snRNP binding	molecular_function	7	ENSG00000125743	1	102	7	17212	0.0407594
GO:0048539	bone marrow development	biological_process	6	ENSG00000171456	1	102	7	17212	0.0407594
GO:0000056	ribosomal small subunit export from nucleus	biological_process	9	ENSG00000280148	1	102	7	17212	0.0407594
GO:1901016	regulation of potassium ion transmembrane transporter activity	biological_process	8	ENSG00000022267	1	102	7	17212	0.0407594
GO:0032414	positive regulation of ion transmembrane transporter activity	biological_process	7	ENSG00000060237	1	102	7	17212	0.0407594
GO:0032541	cortical endoplasmic reticulum	cellular_component	7	ENSG00000248592	1	102	7	17212	0.0407594
GO:0010766	negative regulation of sodium ion transport	biological_process	10	ENSG00000060237	1	102	7	17212	0.0407594
GO:1903288	positive regulation of potassium ion import across plasma membrane	biological_process	12	ENSG00000060237	1	102	7	17212	0.0407594
GO:0006346	methylation-dependent chromatin silencing	biological_process	6	ENSG00000119772	1	102	7	17212	0.0407594
GO:0003677	DNA binding	molecular_function	6	ENSG00000029153;ENSG00000270181;ENSG00000119772;ENSG00000079263;ENSG00000165156;ENSG00000163349;ENSG00000090612;ENSG00000171456;ENSG00000196693;ENSG00000101126;ENSG00000170100;ENSG00000282034;ENSG00000126778;ENSG00000197275;ENSG00000181450;ENSG00000213999;ENSG00000177200;ENSG00000214717;ENSG00000197037	19	102	2113	17212	0.0408383
GO:0005762	mitochondrial large ribosomal subunit	cellular_component	9	ENSG00000198015;ENSG00000159111	2	102	57	17212	0.044951
GO:0001725	stress fiber	cellular_component	7	ENSG00000138758;ENSG00000173210	2	102	58	17212	0.0463806
GO:0030017	sarcomere	cellular_component	5	ENSG00000143761;ENSG00000159251	2	102	58	17212	0.0463806
GO:0017110	nucleoside-diphosphatase activity	molecular_function	8	ENSG00000171302	1	102	8	17212	0.0464463
GO:0042753	positive regulation of circadian rhythm	biological_process	6	ENSG00000029153	1	102	8	17212	0.0464463
GO:0016817	hydrolase activity, acting on acid anhydrides	molecular_function	5	ENSG00000177200	1	102	8	17212	0.0464463
GO:0003084	positive regulation of systemic arterial blood pressure	biological_process	7	ENSG00000060237	1	102	8	17212	0.0464463
GO:0034333	adherens junction assembly	biological_process	7	ENSG00000163349	1	102	8	17212	0.0464463
GO:0090091	positive regulation of extracellular matrix disassembly	biological_process	9	ENSG00000162733	1	102	8	17212	0.0464463
GO:0050805	negative regulation of synaptic transmission	biological_process	8	ENSG00000101126	1	102	8	17212	0.0464463
GO:0051639	actin filament network formation	biological_process	7	ENSG00000162704	1	102	8	17212	0.0464463
GO:0099078	BORC complex	cellular_component	4	ENSG00000165714	1	102	8	17212	0.0464463
GO:1990316	Atg1/ULK1 kinase complex	cellular_component	6	ENSG00000131374	1	102	8	17212	0.0464463
GO:0019870	potassium channel inhibitor activity	molecular_function	7	ENSG00000060237	1	102	8	17212	0.0464463
GO:2000651	positive regulation of sodium ion transmembrane transporter activity	biological_process	8	ENSG00000060237	1	102	8	17212	0.0464463
GO:0008199	ferric iron binding	molecular_function	9	ENSG00000285130	1	102	8	17212	0.0464463
GO:0039536	negative regulation of RIG-I signaling pathway	biological_process	9	ENSG00000129657	1	102	8	17212	0.0464463
GO:0006312	mitotic recombination	biological_process	9	ENSG00000197275	1	102	8	17212	0.0464463
GO:0009968	negative regulation of signal transduction	biological_process	8	ENSG00000117152;ENSG00000129657	2	102	59	17212	0.0478268
GO:0045202	synapse	cellular_component	3	ENSG00000138758;ENSG00000173210;ENSG00000085365;ENSG00000143761;ENSG00000004139;ENSG00000089063;ENSG00000159251	7	102	566	17212	0.051051
GO:0006264	mitochondrial DNA replication	biological_process	10	ENSG00000125871	1	102	9	17212	0.0520998
GO:0030291	protein serine/threonine kinase inhibitor activity	molecular_function	8	ENSG00000060237	1	102	9	17212	0.0520998
GO:0042116	macrophage activation	biological_process	7	ENSG00000003989	1	102	9	17212	0.0520998
GO:0051451	myoblast migration	biological_process	8	ENSG00000126778	1	102	9	17212	0.0520998
GO:0035871	protein K11-linked deubiquitination	biological_process	10	ENSG00000135093	1	102	9	17212	0.0520998
GO:2000726	negative regulation of cardiac muscle cell differentiation	biological_process	10	ENSG00000166225	1	102	9	17212	0.0520998
GO:0003416	endochondral bone growth	biological_process	6	ENSG00000162733	1	102	9	17212	0.0520998
GO:0042754	negative regulation of circadian rhythm	biological_process	6	ENSG00000152455	1	102	9	17212	0.0520998
GO:0050801	ion homeostasis	biological_process	7	ENSG00000060237	1	102	9	17212	0.0520998
GO:1904047	S-adenosyl-L-methionine binding	molecular_function	5	ENSG00000152455	1	102	9	17212	0.0520998
GO:0016458	gene silencing	biological_process	4	ENSG00000282034	1	102	9	17212	0.0520998
GO:0061072	iris morphogenesis	biological_process	5	ENSG00000163349	1	102	9	17212	0.0520998
GO:0031390	Ctf18 RFC-like complex	cellular_component	4	ENSG00000286140	1	102	9	17212	0.0520998
GO:0006333	chromatin assembly or disassembly	biological_process	6	ENSG00000152455	1	102	9	17212	0.0520998
GO:0095500	acetylcholine receptor signaling pathway	biological_process	6	ENSG00000204422	1	102	9	17212	0.0520998
GO:0005518	collagen binding	molecular_function	5	ENSG00000162733;ENSG00000106819	2	102	62	17212	0.0522624
GO:0006325	chromatin organization	biological_process	5	ENSG00000119772;ENSG00000177200;ENSG00000171456;ENSG00000152455;ENSG00000143401	5	102	350	17212	0.0571203
GO:0098974	postsynaptic actin cytoskeleton organization	biological_process	8	ENSG00000143761	1	102	10	17212	0.0577201
GO:0036094	small molecule binding	molecular_function	4	ENSG00000284341	1	102	10	17212	0.0577201
GO:0007614	short-term memory	biological_process	6	ENSG00000101126	1	102	10	17212	0.0577201
GO:0006613	cotranslational protein targeting to membrane	biological_process	13	ENSG00000124783	1	102	10	17212	0.0577201
GO:0046974	histone methyltransferase activity (H3-K9 specific)	molecular_function	10	ENSG00000152455	1	102	10	17212	0.0577201
GO:0030957	Tat protein binding	molecular_function	8	ENSG00000139112	1	102	10	17212	0.0577201
GO:0003170	heart valve development	biological_process	5	ENSG00000015479	1	102	10	17212	0.0577201
GO:0019869	chloride channel inhibitor activity	molecular_function	7	ENSG00000060237	1	102	10	17212	0.0577201
GO:0038063	collagen-activated tyrosine kinase receptor signaling pathway	biological_process	8	ENSG00000162733	1	102	10	17212	0.0577201
GO:0086013	membrane repolarization during cardiac muscle cell action potential	biological_process	10	ENSG00000171385	1	102	10	17212	0.0577201
GO:0046839	phospholipid dephosphorylation	biological_process	8	ENSG00000147535	1	102	10	17212	0.0577201
GO:0043268	positive regulation of potassium ion transport	biological_process	10	ENSG00000022267	1	102	10	17212	0.0577201
GO:2000273	positive regulation of signaling receptor activity	biological_process	9	ENSG00000204422	1	102	10	17212	0.0577201
GO:0098982	GABA-ergic synapse	cellular_component	4	ENSG00000171385;ENSG00000138758	2	102	69	17212	0.0631491
GO:0097284	hepatocyte apoptotic process	biological_process	8	ENSG00000119772	1	102	11	17212	0.0633073
GO:0005068	transmembrane receptor protein tyrosine kinase adaptor activity	molecular_function	8	ENSG00000166225	1	102	11	17212	0.0633073
GO:0005687	U4 snRNP	cellular_component	8	ENSG00000125743	1	102	11	17212	0.0633073
GO:0048513	animal organ development	biological_process	5	ENSG00000126778	1	102	11	17212	0.0633073
GO:0097623	potassium ion export across plasma membrane	biological_process	11	ENSG00000171385	1	102	11	17212	0.0633073
GO:0043030	regulation of macrophage activation	biological_process	7	ENSG00000003989	1	102	11	17212	0.0633073
GO:0006515	protein quality control for misfolded or incompletely synthesized proteins	biological_process	9	ENSG00000145743	1	102	11	17212	0.0633073
GO:0034115	negative regulation of heterotypic cell-cell adhesion	biological_process	8	ENSG00000060237	1	102	11	17212	0.0633073
GO:0004520	endodeoxyribonuclease activity	molecular_function	8	ENSG00000270181	1	102	11	17212	0.0633073
GO:0009743	response to carbohydrate	biological_process	6	ENSG00000101126	1	102	11	17212	0.0633073
GO:0042975	peroxisome proliferator activated receptor binding	molecular_function	6	ENSG00000171456	1	102	11	17212	0.0633073
GO:0019887	protein kinase regulator activity	molecular_function	6	ENSG00000263020	1	102	11	17212	0.0633073
GO:0086009	membrane repolarization	biological_process	8	ENSG00000171385	1	102	11	17212	0.0633073
GO:0008195	phosphatidate phosphatase activity	molecular_function	8	ENSG00000147535	1	102	11	17212	0.0633073
GO:0042589	zymogen granule membrane	cellular_component	8	ENSG00000085365	1	102	11	17212	0.0633073
GO:0006995	cellular response to nitrogen starvation	biological_process	9	ENSG00000139112	1	102	11	17212	0.0633073
GO:0034379	very-low-density lipoprotein particle assembly	biological_process	9	ENSG00000143761	1	102	11	17212	0.0633073
GO:1901380	negative regulation of potassium ion transmembrane transport	biological_process	11	ENSG00000117152	1	102	11	17212	0.0633073
GO:0015075	ion transmembrane transporter activity	molecular_function	5	ENSG00000058063	1	102	11	17212	0.0633073
GO:0010273	detoxification of copper ion	biological_process	5	ENSG00000205362	1	102	11	17212	0.0633073
GO:0030137	COPI-coated vesicle	cellular_component	8	ENSG00000143761	1	102	12	17212	0.0688618
GO:0098915	membrane repolarization during ventricular cardiac muscle cell action potential	biological_process	11	ENSG00000171385	1	102	12	17212	0.0688618
GO:0046949	fatty-acyl-CoA biosynthetic process	biological_process	9	ENSG00000255154	1	102	12	17212	0.0688618
GO:0010820	positive regulation of T cell chemotaxis	biological_process	10	ENSG00000060237	1	102	12	17212	0.0688618
GO:0033130	acetylcholine receptor binding	molecular_function	6	ENSG00000204422	1	102	12	17212	0.0688618
GO:0048699	generation of neurons	biological_process	7	ENSG00000126778	1	102	12	17212	0.0688618
GO:0043586	tongue development	biological_process	7	ENSG00000126778	1	102	12	17212	0.0688618
GO:0071361	cellular response to ethanol	biological_process	7	ENSG00000119772	1	102	12	17212	0.0688618
GO:0006809	nitric oxide biosynthetic process	biological_process	8	ENSG00000003989	1	102	12	17212	0.0688618
GO:0000002	mitochondrial genome maintenance	biological_process	7	ENSG00000125871	1	102	12	17212	0.0688618
GO:0043560	insulin receptor substrate binding	molecular_function	5	ENSG00000178252	1	102	12	17212	0.0688618
GO:1902282	voltage-gated potassium channel activity involved in ventricular cardiac muscle cell action potential repolarization	molecular_function	11	ENSG00000171385	1	102	12	17212	0.0688618
GO:0060644	mammary gland epithelial cell differentiation	biological_process	7	ENSG00000213626	1	102	12	17212	0.0688618
GO:0010763	positive regulation of fibroblast migration	biological_process	9	ENSG00000162733	1	102	12	17212	0.0688618
GO:0015630	microtubule cytoskeleton	cellular_component	7	ENSG00000138758;ENSG00000167552;ENSG00000004139	3	102	161	17212	0.0706432
GO:0055038	recycling endosome membrane	cellular_component	9	ENSG00000085365;ENSG00000058063	2	102	75	17212	0.0730317
GO:0005885	Arp2/3 protein complex	cellular_component	4	ENSG00000162704	1	102	13	17212	0.0743837
GO:0007064	mitotic sister chromatid cohesion	biological_process	6	ENSG00000286140	1	102	13	17212	0.0743837
GO:0005940	septin ring	cellular_component	8	ENSG00000138758	1	102	13	17212	0.0743837
GO:0045744	negative regulation of G protein-coupled receptor signaling pathway	biological_process	9	ENSG00000117152	1	102	13	17212	0.0743837
GO:0001741	XY body	cellular_component	8	ENSG00000119772	1	102	13	17212	0.0743837
GO:0006098	pentose-phosphate shunt	biological_process	7	ENSG00000197713	1	102	13	17212	0.0743837
GO:0030688	preribosome, small subunit precursor	cellular_component	6	ENSG00000280148	1	102	13	17212	0.0743837
GO:0030240	skeletal muscle thin filament assembly	biological_process	7	ENSG00000159251	1	102	13	17212	0.0743837
GO:0006349	regulation of gene expression by genetic imprinting	biological_process	9	ENSG00000119772	1	102	13	17212	0.0743837
GO:0003724	RNA helicase activity	molecular_function	10	ENSG00000197275	1	102	13	17212	0.0743837
GO:0031105	septin complex	cellular_component	4	ENSG00000138758	1	102	13	17212	0.0743837
GO:0061052	negative regulation of cell growth involved in cardiac muscle cell development	biological_process	11	ENSG00000117152	1	102	13	17212	0.0743837
GO:0048596	embryonic camera-type eye morphogenesis	biological_process	8	ENSG00000163349	1	102	13	17212	0.0743837
GO:1990869	cellular response to chemokine	biological_process	8	ENSG00000060237	1	102	13	17212	0.0743837
GO:0001952	regulation of cell-matrix adhesion	biological_process	7	ENSG00000162733	1	102	13	17212	0.0743837
GO:0014067	negative regulation of phosphatidylinositol 3-kinase signaling	biological_process	10	ENSG00000100100	1	102	13	17212	0.0743837
GO:0048665	neuron fate specification	biological_process	6	ENSG00000126778	1	102	13	17212	0.0743837
GO:0030122	AP-2 adaptor complex	cellular_component	8	ENSG00000131374	1	102	13	17212	0.0743837
GO:0033147	negative regulation of intracellular estrogen receptor signaling pathway	biological_process	10	ENSG00000213626	1	102	13	17212	0.0743837
GO:0034709	methylosome	cellular_component	6	ENSG00000125743	1	102	13	17212	0.0743837
GO:0060047	heart contraction	biological_process	7	ENSG00000159251	1	102	13	17212	0.0743837
GO:0030166	proteoglycan biosynthetic process	biological_process	9	ENSG00000171302	1	102	14	17212	0.0798731
GO:0008053	mitochondrial fusion	biological_process	7	ENSG00000135093	1	102	14	17212	0.0798731
GO:0031103	axon regeneration	biological_process	7	ENSG00000134986	1	102	14	17212	0.0798731
GO:0050811	GABA receptor binding	molecular_function	6	ENSG00000139112	1	102	14	17212	0.0798731
GO:2000737	negative regulation of stem cell differentiation	biological_process	8	ENSG00000213626	1	102	14	17212	0.0798731
GO:0006878	cellular copper ion homeostasis	biological_process	12	ENSG00000143761	1	102	14	17212	0.0798731
GO:0033673	negative regulation of kinase activity	biological_process	11	ENSG00000060237	1	102	14	17212	0.0798731
GO:0000976	transcription regulatory region sequence-specific DNA binding	molecular_function	8	ENSG00000152455;ENSG00000126778	2	102	79	17212	0.0798783
GO:0010389	regulation of G2/M transition of mitotic cell cycle	biological_process	9	ENSG00000167552;ENSG00000176101	2	102	80	17212	0.0816204
GO:0035909	aorta morphogenesis	biological_process	8	ENSG00000126778	1	102	15	17212	0.0853303
GO:0010035	response to inorganic substance	biological_process	5	ENSG00000101126	1	102	15	17212	0.0853303
GO:0060216	definitive hemopoiesis	biological_process	8	ENSG00000163349	1	102	15	17212	0.0853303
GO:0035591	signaling adaptor activity	molecular_function	6	ENSG00000004139	1	102	15	17212	0.0853303
GO:0030021	extracellular matrix structural constituent conferring compression resistance	molecular_function	5	ENSG00000106819	1	102	15	17212	0.0853303
GO:0045956	positive regulation of calcium ion-dependent exocytosis	biological_process	10	ENSG00000143761	1	102	15	17212	0.0853303
GO:0030027	lamellipodium	cellular_component	6	ENSG00000162704;ENSG00000159251;ENSG00000173210	3	102	176	17212	0.0868801
GO:0044297	cell body	cellular_component	4	ENSG00000139112;ENSG00000159251	2	102	84	17212	0.0887042
GO:0060292	long-term synaptic depression	biological_process	10	ENSG00000143761	1	102	16	17212	0.0907555
GO:0043046	DNA methylation involved in gamete generation	biological_process	11	ENSG00000119772	1	102	16	17212	0.0907555
GO:0033189	response to vitamin A	biological_process	9	ENSG00000119772	1	102	16	17212	0.0907555
GO:1901379	regulation of potassium ion transmembrane transport	biological_process	10	ENSG00000117152	1	102	16	17212	0.0907555
GO:0005001	transmembrane receptor protein tyrosine phosphatase activity	molecular_function	10	ENSG00000080031	1	102	16	17212	0.0907555
GO:0045926	negative regulation of growth	biological_process	6	ENSG00000205362	1	102	16	17212	0.0907555
GO:0042974	retinoic acid receptor binding	molecular_function	8	ENSG00000171456	1	102	16	17212	0.0907555
GO:0030705	cytoskeleton-dependent intracellular transport	biological_process	7	ENSG00000167552	1	102	16	17212	0.0907555
GO:0048489	synaptic vesicle transport	biological_process	6	ENSG00000089063	1	102	16	17212	0.0907555
GO:0005925	focal adhesion	cellular_component	7	ENSG00000159251;ENSG00000162704;ENSG00000022267;ENSG00000143761;ENSG00000162733	5	102	405	17212	0.0928762
GO:0070125	mitochondrial translational elongation	biological_process	9	ENSG00000159111;ENSG00000198015	2	102	87	17212	0.0941329
GO:0070126	mitochondrial translational termination	biological_process	9	ENSG00000159111;ENSG00000198015	2	102	88	17212	0.0959636
GO:0005200	structural constituent of cytoskeleton	molecular_function	4	ENSG00000167552;ENSG00000162704	2	102	88	17212	0.0959636
GO:0090190	positive regulation of branching involved in ureteric bud morphogenesis	biological_process	10	ENSG00000126778	1	102	17	17212	0.0961488
GO:0004012	ATPase-coupled phospholipid transporter activity	molecular_function	6	ENSG00000058063	1	102	17	17212	0.0961488
GO:0031224	intrinsic component of membrane	cellular_component	4	ENSG00000165714	1	102	17	17212	0.0961488
GO:0030532	small nuclear ribonucleoprotein complex	cellular_component	6	ENSG00000125743	1	102	17	17212	0.0961488
GO:0055003	cardiac myofibril assembly	biological_process	8	ENSG00000159251	1	102	17	17212	0.0961488
GO:0060037	pharyngeal system development	biological_process	6	ENSG00000126778	1	102	17	17212	0.0961488
GO:0007405	neuroblast proliferation	biological_process	5	ENSG00000166225	1	102	17	17212	0.0961488
GO:0001702	gastrulation with mouth forming second	biological_process	7	ENSG00000166225	1	102	17	17212	0.0961488
GO:0030539	male genitalia development	biological_process	7	ENSG00000065802	1	102	17	17212	0.0961488
GO:0010038	response to metal ion	biological_process	6	ENSG00000205362	1	102	18	17212	0.10151
GO:0005682	U5 snRNP	cellular_component	8	ENSG00000125743	1	102	18	17212	0.10151
GO:0044849	estrous cycle	biological_process	5	ENSG00000101126	1	102	18	17212	0.10151
GO:0001223	transcription coactivator binding	molecular_function	7	ENSG00000126778	1	102	18	17212	0.10151
GO:0010460	positive regulation of heart rate	biological_process	10	ENSG00000117152	1	102	18	17212	0.10151
GO:0002028	regulation of sodium ion transport	biological_process	9	ENSG00000060237	1	102	18	17212	0.10151
GO:0034719	SMN-Sm protein complex	cellular_component	6	ENSG00000125743	1	102	18	17212	0.10151
GO:0071294	cellular response to zinc ion	biological_process	8	ENSG00000205362	1	102	18	17212	0.10151
GO:0019789	SUMO transferase activity	molecular_function	6	ENSG00000214717	1	102	18	17212	0.10151
GO:0031668	cellular response to extracellular stimulus	biological_process	5	ENSG00000101126	1	102	18	17212	0.10151
GO:0055008	cardiac muscle tissue morphogenesis	biological_process	7	ENSG00000159251	1	102	18	17212	0.10151
GO:0032147	activation of protein kinase activity	biological_process	12	ENSG00000101126;ENSG00000060237	2	102	91	17212	0.101516
GO:0046983	protein dimerization activity	molecular_function	5	ENSG00000214717;ENSG00000213999;ENSG00000029153	3	102	191	17212	0.104542
GO:0015934	large ribosomal subunit	cellular_component	7	ENSG00000159111	1	102	19	17212	0.10684
GO:0010842	retina layer formation	biological_process	5	ENSG00000163349	1	102	19	17212	0.10684
GO:0006892	post-Golgi vesicle-mediated transport	biological_process	8	ENSG00000085365	1	102	19	17212	0.10684
GO:0034314	Arp2/3 complex-mediated actin nucleation	biological_process	8	ENSG00000162704	1	102	19	17212	0.10684
GO:0016226	iron-sulfur cluster assembly	biological_process	6	ENSG00000285130	1	102	19	17212	0.10684
GO:0030048	actin filament-based movement	biological_process	5	ENSG00000159251	1	102	19	17212	0.10684
GO:0008610	lipid biosynthetic process	biological_process	6	ENSG00000109929	1	102	19	17212	0.10684
GO:0019934	cGMP-mediated signaling	biological_process	8	ENSG00000101126	1	102	19	17212	0.10684
GO:0016236	macroautophagy	biological_process	7	ENSG00000131374;ENSG00000139112	2	102	94	17212	0.107156
GO:0097711	ciliary basal body-plasma membrane docking	biological_process	6	ENSG00000167552;ENSG00000176101	2	102	95	17212	0.109055
GO:0007517	muscle organ development	biological_process	6	ENSG00000213999;ENSG00000022267	2	102	96	17212	0.110962
GO:0003678	DNA helicase activity	molecular_function	10	ENSG00000197275	1	102	20	17212	0.112139
GO:0017015	regulation of transforming growth factor beta receptor signaling pathway	biological_process	9	ENSG00000134986	1	102	20	17212	0.112139
GO:0005686	U2 snRNP	cellular_component	8	ENSG00000125743	1	102	20	17212	0.112139
GO:1901214	regulation of neuron death	biological_process	7	ENSG00000004139	1	102	20	17212	0.112139
GO:0042474	middle ear morphogenesis	biological_process	6	ENSG00000126778	1	102	20	17212	0.112139
GO:0010288	response to lead ion	biological_process	7	ENSG00000119772	1	102	20	17212	0.112139
GO:0005685	U1 snRNP	cellular_component	8	ENSG00000125743	1	102	20	17212	0.112139
GO:0090103	cochlea morphogenesis	biological_process	6	ENSG00000126778	1	102	20	17212	0.112139
GO:0042246	tissue regeneration	biological_process	6	ENSG00000248592	1	102	20	17212	0.112139
GO:0042274	ribosomal small subunit biogenesis	biological_process	6	ENSG00000280148	1	102	20	17212	0.112139
GO:0048011	neurotrophin TRK receptor signaling pathway	biological_process	8	ENSG00000166225	1	102	20	17212	0.112139
GO:0071280	cellular response to copper ion	biological_process	8	ENSG00000205362	1	102	20	17212	0.112139
GO:0016605	PML body	cellular_component	8	ENSG00000079263;ENSG00000163349	2	102	97	17212	0.112878
GO:0003924	GTPase activity	molecular_function	9	ENSG00000138758;ENSG00000167552;ENSG00000117152;ENSG00000143761	4	102	315	17212	0.117323
GO:0005104	fibroblast growth factor receptor binding	molecular_function	7	ENSG00000166225	1	102	21	17212	0.117407
GO:0030904	retromer complex	cellular_component	4	ENSG00000131374	1	102	21	17212	0.117407
GO:0061640	cytoskeleton-dependent cytokinesis	biological_process	6	ENSG00000138758	1	102	21	17212	0.117407
GO:0018230	peptidyl-L-cysteine S-palmitoylation	biological_process	12	ENSG00000184307	1	102	21	17212	0.117407
GO:0005720	nuclear heterochromatin	cellular_component	8	ENSG00000119772	1	102	21	17212	0.117407
GO:0071157	negative regulation of cell cycle arrest	biological_process	9	ENSG00000090612	1	102	21	17212	0.117407
GO:0000981	DNA-binding transcription factor activity, RNA polymerase II-specific	molecular_function	5	ENSG00000170100;ENSG00000165156;ENSG00000090612;ENSG00000029153;ENSG00000197037;ENSG00000214717;ENSG00000213999;ENSG00000101126;ENSG00000126778;ENSG00000196693;ENSG00000119772;ENSG00000181450	12	102	1390	17212	0.119928
GO:0007169	transmembrane receptor protein tyrosine kinase signaling pathway	biological_process	7	ENSG00000166225;ENSG00000162733	2	102	101	17212	0.120628
GO:0005622	intracellular	cellular_component	4	ENSG00000139112;ENSG00000197037;ENSG00000181450;ENSG00000196693;ENSG00000159111;ENSG00000170100;ENSG00000090612	7	102	701	17212	0.122389
GO:0006338	chromatin remodeling	biological_process	6	ENSG00000282034;ENSG00000152455	2	102	102	17212	0.122586
GO:0051170	import into nucleus	biological_process	9	ENSG00000125743	1	102	22	17212	0.122644
GO:0001965	G-protein alpha-subunit binding	molecular_function	5	ENSG00000117152	1	102	22	17212	0.122644
GO:0006295	nucleotide-excision repair, DNA incision, 3'-to lesion	biological_process	10	ENSG00000270181	1	102	22	17212	0.122644
GO:0031674	I band	cellular_component	5	ENSG00000159251	1	102	22	17212	0.122644
GO:0006306	DNA methylation	biological_process	10	ENSG00000119772	1	102	22	17212	0.122644
GO:0030500	regulation of bone mineralization	biological_process	7	ENSG00000162733	1	102	22	17212	0.122644
GO:0035584	calcium-mediated signaling using intracellular calcium source	biological_process	8	ENSG00000248592	1	102	22	17212	0.122644
GO:0048814	regulation of dendrite morphogenesis	biological_process	9	ENSG00000004139	1	102	22	17212	0.122644
GO:0048872	homeostasis of number of cells	biological_process	6	ENSG00000171456	1	102	22	17212	0.122644
GO:0002092	positive regulation of receptor internalization	biological_process	8	ENSG00000131374	1	102	22	17212	0.122644
GO:0009887	animal organ morphogenesis	biological_process	5	ENSG00000022267;ENSG00000171456	2	102	104	17212	0.126525
GO:0005667	transcription factor complex	cellular_component	4	ENSG00000213999;ENSG00000029153;ENSG00000126778	3	102	209	17212	0.127426
GO:0018345	protein palmitoylation	biological_process	10	ENSG00000184307	1	102	23	17212	0.12785
GO:0031528	microvillus membrane	cellular_component	6	ENSG00000080031	1	102	23	17212	0.12785
GO:0010608	posttranscriptional regulation of gene expression	biological_process	8	ENSG00000015479	1	102	23	17212	0.12785
GO:0017022	myosin binding	molecular_function	6	ENSG00000159251	1	102	23	17212	0.12785
GO:2001243	negative regulation of intrinsic apoptotic signaling pathway	biological_process	10	ENSG00000129473	1	102	23	17212	0.12785
GO:0030878	thyroid gland development	biological_process	7	ENSG00000126778	1	102	23	17212	0.12785
GO:0060999	positive regulation of dendritic spine development	biological_process	13	ENSG00000143761	1	102	23	17212	0.12785
GO:0036151	phosphatidylcholine acyl-chain remodeling	biological_process	10	ENSG00000180089	1	102	23	17212	0.12785
GO:0016363	nuclear matrix	cellular_component	6	ENSG00000119772;ENSG00000015479	2	102	105	17212	0.128506
GO:0010468	regulation of gene expression	biological_process	7	ENSG00000126778;ENSG00000213626;ENSG00000119772	3	102	210	17212	0.128747
GO:0000978	RNA polymerase II proximal promoter sequence-specific DNA binding	molecular_function	10	ENSG00000213999;ENSG00000119772;ENSG00000029153;ENSG00000126778;ENSG00000214717	5	102	450	17212	0.128985
GO:0070372	regulation of ERK1 and ERK2 cascade	biological_process	11	ENSG00000166225	1	102	24	17212	0.133025
GO:0008589	regulation of smoothened signaling pathway	biological_process	8	ENSG00000145743	1	102	24	17212	0.133025
GO:0045332	phospholipid translocation	biological_process	9	ENSG00000058063	1	102	24	17212	0.133025
GO:0048741	skeletal muscle fiber development	biological_process	9	ENSG00000126778	1	102	24	17212	0.133025
GO:0006882	cellular zinc ion homeostasis	biological_process	12	ENSG00000205362	1	102	24	17212	0.133025
GO:0042073	intraciliary transport	biological_process	7	ENSG00000176101	1	102	24	17212	0.133025
GO:0045807	positive regulation of endocytosis	biological_process	8	ENSG00000143761	1	102	24	17212	0.133025
GO:0032418	lysosome localization	biological_process	6	ENSG00000165714	1	102	24	17212	0.133025
GO:0097352	autophagosome maturation	biological_process	7	ENSG00000139112	1	102	24	17212	0.133025
GO:0071901	negative regulation of protein serine/threonine kinase activity	biological_process	12	ENSG00000060237	1	102	24	17212	0.133025
GO:0099060	integral component of postsynaptic specialization membrane	cellular_component	5	ENSG00000171385	1	102	25	17212	0.13817
GO:0002218	activation of innate immune response	biological_process	5	ENSG00000015479	1	102	25	17212	0.13817
GO:0032590	dendrite membrane	cellular_component	7	ENSG00000139112	1	102	25	17212	0.13817
GO:0000188	inactivation of MAPK activity	biological_process	13	ENSG00000117152	1	102	25	17212	0.13817
GO:0008236	serine-type peptidase activity	molecular_function	6	ENSG00000150687;ENSG00000244255	2	102	112	17212	0.14257
GO:0000245	spliceosomal complex assembly	biological_process	9	ENSG00000125743	1	102	26	17212	0.143285
GO:0031032	actomyosin structure organization	biological_process	8	ENSG00000159251	1	102	26	17212	0.143285
GO:0098586	cellular response to virus	biological_process	8	ENSG00000143761	1	102	26	17212	0.143285
GO:2000463	positive regulation of excitatory postsynaptic potential	biological_process	9	ENSG00000117152	1	102	26	17212	0.143285
GO:0050690	regulation of defense response to virus by virus	biological_process	7	ENSG00000143761	1	102	26	17212	0.143285
GO:0006893	Golgi to plasma membrane transport	biological_process	9	ENSG00000143761	1	102	26	17212	0.143285
GO:0098978	glutamatergic synapse	cellular_component	4	ENSG00000143761;ENSG00000159251;ENSG00000173210;ENSG00000138758	4	102	342	17212	0.145389
GO:0030295	protein kinase activator activity	molecular_function	7	ENSG00000060237	1	102	27	17212	0.148369
GO:0005689	U12-type spliceosomal complex	cellular_component	7	ENSG00000125743	1	102	27	17212	0.148369
GO:0071456	cellular response to hypoxia	biological_process	6	ENSG00000152455;ENSG00000119772	2	102	117	17212	0.152808
GO:0034968	histone lysine methylation	biological_process	12	ENSG00000152455	1	102	28	17212	0.153424
GO:0010803	regulation of tumor necrosis factor-mediated signaling pathway	biological_process	9	ENSG00000163349	1	102	28	17212	0.153424
GO:0035198	miRNA binding	molecular_function	8	ENSG00000015479	1	102	28	17212	0.153424
GO:0000421	autophagosome membrane	cellular_component	8	ENSG00000139112	1	102	28	17212	0.153424
GO:0019706	protein-cysteine S-palmitoyltransferase activity	molecular_function	8	ENSG00000184307	1	102	28	17212	0.153424
GO:0048856	anatomical structure development	biological_process	4	ENSG00000126778	1	102	28	17212	0.153424
GO:0042771	intrinsic apoptotic signaling pathway in response to DNA damage by p53 class mediator	biological_process	8	ENSG00000163349	1	102	28	17212	0.153424
GO:0097192	extrinsic apoptotic signaling pathway in absence of ligand	biological_process	6	ENSG00000129473	1	102	28	17212	0.153424
GO:0015171	amino acid transmembrane transporter activity	molecular_function	7	ENSG00000003989	1	102	28	17212	0.153424
GO:1904813	ficolin-1-rich granule lumen	cellular_component	7	ENSG00000171302;ENSG00000162704	2	102	118	17212	0.154873
GO:0044325	ion channel binding	molecular_function	5	ENSG00000171385;ENSG00000022267	2	102	118	17212	0.154873
GO:0043278	response to morphine	biological_process	6	ENSG00000117152	1	102	29	17212	0.158449
GO:0000387	spliceosomal snRNP assembly	biological_process	9	ENSG00000125743	1	102	29	17212	0.158449
GO:0005763	mitochondrial small ribosomal subunit	cellular_component	9	ENSG00000198015	1	102	29	17212	0.158449
GO:0030833	regulation of actin filament polymerization	biological_process	8	ENSG00000162704	1	102	29	17212	0.158449
GO:0042594	response to starvation	biological_process	5	ENSG00000131374	1	102	29	17212	0.158449
GO:0016791	phosphatase activity	molecular_function	7	ENSG00000147535;ENSG00000080031	2	102	121	17212	0.1611
GO:0090305	nucleic acid phosphodiester bond hydrolysis	biological_process	8	ENSG00000125871;ENSG00000270181	2	102	121	17212	0.1611
GO:0048678	response to axon injury	biological_process	6	ENSG00000004139	1	102	30	17212	0.163445
GO:0007131	reciprocal meiotic recombination	biological_process	10	ENSG00000197275	1	102	30	17212	0.163445
GO:0042393	histone binding	molecular_function	5	ENSG00000143401;ENSG00000282034	2	102	123	17212	0.165276
GO:0051924	regulation of calcium ion transport	biological_process	9	ENSG00000117152	1	102	31	17212	0.168411
GO:0004553	hydrolase activity, hydrolyzing O-glycosyl compounds	molecular_function	6	ENSG00000260729	1	102	31	17212	0.168411
GO:0001975	response to amphetamine	biological_process	6	ENSG00000117152	1	102	31	17212	0.168411
GO:0016126	sterol biosynthetic process	biological_process	8	ENSG00000109929	1	102	31	17212	0.168411
GO:0071007	U2-type catalytic step 2 spliceosome	cellular_component	8	ENSG00000125743	1	102	31	17212	0.168411
GO:1903955	positive regulation of protein targeting to mitochondrion	biological_process	10	ENSG00000173210	1	102	31	17212	0.168411
GO:0000792	heterochromatin	cellular_component	7	ENSG00000119772	1	102	31	17212	0.168411
GO:0043044	ATP-dependent chromatin remodeling	biological_process	7	ENSG00000282034	1	102	31	17212	0.168411
GO:0045859	regulation of protein kinase activity	biological_process	10	ENSG00000263020	1	102	31	17212	0.168411
GO:0048511	rhythmic process	biological_process	3	ENSG00000152455;ENSG00000029153	2	102	125	17212	0.169472
GO:0000785	chromatin	cellular_component	6	ENSG00000152455;ENSG00000166801	2	102	126	17212	0.171577
GO:0004252	serine-type endopeptidase activity	molecular_function	8	ENSG00000244255;ENSG00000150687	2	102	126	17212	0.171577
GO:0042981	regulation of apoptotic process	biological_process	8	ENSG00000004139;ENSG00000129473;ENSG00000166225	3	102	241	17212	0.171932
GO:0002088	lens development in camera-type eye	biological_process	5	ENSG00000166225	1	102	32	17212	0.173348
GO:0048701	embryonic cranial skeleton morphogenesis	biological_process	8	ENSG00000126778	1	102	32	17212	0.173348
GO:0071276	cellular response to cadmium ion	biological_process	8	ENSG00000205362	1	102	32	17212	0.173348
GO:0032839	dendrite cytoplasm	cellular_component	9	ENSG00000139112	1	102	32	17212	0.173348
GO:0046540	U4/U6 x U5 tri-snRNP complex	cellular_component	9	ENSG00000125743	1	102	32	17212	0.173348
GO:0006259	DNA metabolic process	biological_process	7	ENSG00000272410	1	102	32	17212	0.173348
GO:0006351	transcription, DNA-templated	biological_process	8	ENSG00000173210;ENSG00000171456	2	102	127	17212	0.173687
GO:0004518	nuclease activity	molecular_function	6	ENSG00000270181;ENSG00000125871	2	102	128	17212	0.1758
GO:0030879	mammary gland development	biological_process	7	ENSG00000213626	1	102	33	17212	0.178256
GO:0030049	muscle filament sliding	biological_process	8	ENSG00000159251	1	102	33	17212	0.178256
GO:0045773	positive regulation of axon extension	biological_process	8	ENSG00000101126	1	102	33	17212	0.178256
GO:0000086	G2/M transition of mitotic cell cycle	biological_process	7	ENSG00000167552;ENSG00000176101	2	102	131	17212	0.182166
GO:0001654	eye development	biological_process	7	ENSG00000163349	1	102	34	17212	0.183135
GO:0043209	myelin sheath	cellular_component	4	ENSG00000167552	1	102	34	17212	0.183135
GO:0045540	regulation of cholesterol biosynthetic process	biological_process	10	ENSG00000109929	1	102	34	17212	0.183135
GO:0001650	fibrillar center	cellular_component	7	ENSG00000166801;ENSG00000079263	2	102	132	17212	0.184296
GO:0005246	calcium channel regulator activity	molecular_function	6	ENSG00000248592	1	102	35	17212	0.187985
GO:0008180	COP9 signalosome	cellular_component	4	ENSG00000178252	1	102	35	17212	0.187985
GO:0034504	protein localization to nucleus	biological_process	8	ENSG00000126778	1	102	35	17212	0.187985
GO:0030032	lamellipodium assembly	biological_process	8	ENSG00000173210	1	102	35	17212	0.187985
GO:0004860	protein kinase inhibitor activity	molecular_function	7	ENSG00000060237	1	102	35	17212	0.187985
GO:0097718	disordered domain specific binding	molecular_function	6	ENSG00000129473	1	102	35	17212	0.187985
GO:0018024	histone-lysine N-methyltransferase activity	molecular_function	9	ENSG00000152455	1	102	35	17212	0.187985
GO:0005770	late endosome	cellular_component	8	ENSG00000089063;ENSG00000143761	2	102	134	17212	0.188566
GO:0030182	neuron differentiation	biological_process	6	ENSG00000119772;ENSG00000163349	2	102	135	17212	0.190706
GO:0045071	negative regulation of viral genome replication	biological_process	10	ENSG00000166801	1	102	36	17212	0.192807
GO:0007017	microtubule-based process	biological_process	4	ENSG00000167552	1	102	36	17212	0.192807
GO:0043524	negative regulation of neuron apoptotic process	biological_process	10	ENSG00000101126;ENSG00000126778	2	102	136	17212	0.19285
GO:0086091	regulation of heart rate by cardiac conduction	biological_process	10	ENSG00000171385	1	102	37	17212	0.197601
GO:0009058	biosynthetic process	biological_process	4	ENSG00000286112	1	102	37	17212	0.197601
GO:0005769	early endosome	cellular_component	8	ENSG00000089063;ENSG00000058063;ENSG00000214357	3	102	259	17212	0.198683
GO:0007346	regulation of mitotic cell cycle	biological_process	7	ENSG00000090612	1	102	38	17212	0.202366
GO:0004386	helicase activity	molecular_function	9	ENSG00000177200;ENSG00000197275	2	102	141	17212	0.203614
GO:0005794	Golgi apparatus	cellular_component	6	ENSG00000184307;ENSG00000085365;ENSG00000259075;ENSG00000143761;ENSG00000129657;ENSG00000058063;ENSG00000089063;ENSG00000139112;ENSG00000131374;ENSG00000171302	10	102	1248	17212	0.204306
GO:0003700	DNA-binding transcription factor activity	molecular_function	4	ENSG00000197037;ENSG00000079263;ENSG00000090612;ENSG00000213999;ENSG00000165156;ENSG00000126778;ENSG00000029153	7	102	813	17212	0.207098
GO:0001657	ureteric bud development	biological_process	7	ENSG00000126778	1	102	39	17212	0.207103
GO:0001658	branching involved in ureteric bud morphogenesis	biological_process	7	ENSG00000126778	1	102	39	17212	0.207103
GO:0000775	chromosome, centromeric region	cellular_component	7	ENSG00000119772;ENSG00000152455	2	102	144	17212	0.210106
GO:0002062	chondrocyte differentiation	biological_process	6	ENSG00000248592	1	102	40	17212	0.211813
GO:0008277	regulation of G protein-coupled receptor signaling pathway	biological_process	8	ENSG00000117152	1	102	40	17212	0.211813
GO:0048705	skeletal system morphogenesis	biological_process	6	ENSG00000126778	1	102	40	17212	0.211813
GO:0045597	positive regulation of cell differentiation	biological_process	7	ENSG00000090612	1	102	40	17212	0.211813
GO:0003682	chromatin binding	molecular_function	4	ENSG00000101126;ENSG00000119772;ENSG00000171456;ENSG00000126778	4	102	401	17212	0.214401
GO:0018105	peptidyl-serine phosphorylation	biological_process	10	ENSG00000060237;ENSG00000211455	2	102	146	17212	0.214446
GO:0060048	cardiac muscle contraction	biological_process	8	ENSG00000159251	1	102	41	17212	0.216495
GO:0006289	nucleotide-excision repair	biological_process	9	ENSG00000270181	1	102	42	17212	0.221149
GO:0030282	bone mineralization	biological_process	7	ENSG00000106819	1	102	42	17212	0.221149
GO:0050714	positive regulation of protein secretion	biological_process	10	ENSG00000143761	1	102	42	17212	0.221149
GO:0015914	phospholipid transport	biological_process	8	ENSG00000058063	1	102	43	17212	0.225776
GO:0006612	protein targeting to membrane	biological_process	12	ENSG00000184307	1	102	44	17212	0.230375
GO:0071005	U2-type precatalytic spliceosome	cellular_component	8	ENSG00000125743	1	102	44	17212	0.230375
GO:0070888	E-box binding	molecular_function	11	ENSG00000029153	1	102	44	17212	0.230375
GO:0030134	COPII-coated ER to Golgi transport vesicle	cellular_component	8	ENSG00000258881	1	102	44	17212	0.230375
GO:0097191	extrinsic apoptotic signaling pathway	biological_process	6	ENSG00000163349	1	102	44	17212	0.230375
GO:1990904	ribonucleoprotein complex	cellular_component	4	ENSG00000159111;ENSG00000139675	2	102	154	17212	0.231885
GO:0030659	cytoplasmic vesicle membrane	cellular_component	6	ENSG00000139112;ENSG00000085365	2	102	155	17212	0.234072
GO:0022857	transmembrane transporter activity	molecular_function	4	ENSG00000003989;ENSG00000077713	2	102	155	17212	0.234072
GO:0061337	cardiac conduction	biological_process	9	ENSG00000171385	1	102	45	17212	0.234948
GO:0006520	cellular amino acid metabolic process	biological_process	8	ENSG00000003989	1	102	45	17212	0.234948
GO:0048704	embryonic skeletal system morphogenesis	biological_process	7	ENSG00000126778	1	102	45	17212	0.234948
GO:0032526	response to retinoic acid	biological_process	6	ENSG00000171456	1	102	45	17212	0.234948
GO:0030199	collagen fibril organization	biological_process	7	ENSG00000162733	1	102	45	17212	0.234948
GO:0005681	spliceosomal complex	cellular_component	6	ENSG00000139675;ENSG00000125743	2	102	156	17212	0.23626
GO:0007010	cytoskeleton organization	biological_process	6	ENSG00000167552;ENSG00000173210	2	102	157	17212	0.23845
GO:0000186	activation of MAPKK activity	biological_process	13	ENSG00000166225	1	102	46	17212	0.239493
GO:0010212	response to ionizing radiation	biological_process	6	ENSG00000119772	1	102	46	17212	0.239493
GO:0035722	interleukin-12-mediated signaling pathway	biological_process	7	ENSG00000143761	1	102	46	17212	0.239493
GO:0034260	negative regulation of GTPase activity	biological_process	8	ENSG00000060237	1	102	46	17212	0.239493
GO:0045599	negative regulation of fat cell differentiation	biological_process	8	ENSG00000171456	1	102	46	17212	0.239493
GO:0019902	phosphatase binding	molecular_function	6	ENSG00000060237	1	102	47	17212	0.244012
GO:0003007	heart morphogenesis	biological_process	6	ENSG00000171456	1	102	47	17212	0.244012
GO:0010923	negative regulation of phosphatase activity	biological_process	11	ENSG00000060237	1	102	47	17212	0.244012
GO:0030036	actin cytoskeleton organization	biological_process	7	ENSG00000173210;ENSG00000162704	2	102	161	17212	0.247218
GO:0010942	positive regulation of cell death	biological_process	7	ENSG00000119772	1	102	48	17212	0.248505
GO:0048839	inner ear development	biological_process	5	ENSG00000126778	1	102	48	17212	0.248505
GO:0003151	outflow tract morphogenesis	biological_process	5	ENSG00000126778	1	102	48	17212	0.248505
GO:0010507	negative regulation of autophagy	biological_process	9	ENSG00000178252	1	102	48	17212	0.248505
GO:0008630	intrinsic apoptotic signaling pathway in response to DNA damage	biological_process	7	ENSG00000129473	1	102	48	17212	0.248505
GO:0042277	peptide binding	molecular_function	5	ENSG00000101126	1	102	48	17212	0.248505
GO:0006914	autophagy	biological_process	6	ENSG00000139112;ENSG00000131374	2	102	162	17212	0.249412
GO:0006865	amino acid transport	biological_process	10	ENSG00000003989	1	102	49	17212	0.252971
GO:0004714	transmembrane receptor protein tyrosine kinase activity	molecular_function	9	ENSG00000162733	1	102	49	17212	0.252971
GO:1904724	tertiary granule lumen	cellular_component	7	ENSG00000171302	1	102	49	17212	0.252971
GO:0007519	skeletal muscle tissue development	biological_process	8	ENSG00000126778	1	102	50	17212	0.25741
GO:0048146	positive regulation of fibroblast proliferation	biological_process	8	ENSG00000162733	1	102	50	17212	0.25741
GO:0043312	neutrophil degranulation	biological_process	9	ENSG00000058063;ENSG00000171302;ENSG00000085365;ENSG00000162704	4	102	435	17212	0.257703
GO:0003735	structural constituent of ribosome	molecular_function	4	ENSG00000198015;ENSG00000159111	2	102	167	17212	0.260392
GO:0004527	exonuclease activity	molecular_function	7	ENSG00000125871	1	102	51	17212	0.261824
GO:0005507	copper ion binding	molecular_function	8	ENSG00000101126	1	102	51	17212	0.261824
GO:0031667	response to nutrient levels	biological_process	6	ENSG00000119772	1	102	51	17212	0.261824
GO:0005881	cytoplasmic microtubule	cellular_component	8	ENSG00000167552	1	102	51	17212	0.261824
GO:0030170	pyridoxal phosphate binding	molecular_function	6	ENSG00000286112	1	102	52	17212	0.266211
GO:0031252	cell leading edge	cellular_component	4	ENSG00000143761	1	102	52	17212	0.266211
GO:0000278	mitotic cell cycle	biological_process	5	ENSG00000167552;ENSG00000119772	2	102	171	17212	0.269181
GO:0046777	protein autophosphorylation	biological_process	10	ENSG00000162733;ENSG00000060237	2	102	171	17212	0.269181
GO:0071230	cellular response to amino acid stimulus	biological_process	7	ENSG00000119772	1	102	53	17212	0.270573
GO:0032880	regulation of protein localization	biological_process	6	ENSG00000126778	1	102	53	17212	0.270573
GO:0005249	voltage-gated potassium channel activity	molecular_function	9	ENSG00000171385	1	102	53	17212	0.270573
GO:0045860	positive regulation of protein kinase activity	biological_process	11	ENSG00000162733	1	102	54	17212	0.274909
GO:0035577	azurophil granule membrane	cellular_component	10	ENSG00000058063	1	102	54	17212	0.274909
GO:0045814	negative regulation of gene expression, epigenetic	biological_process	9	ENSG00000119772	1	102	54	17212	0.274909
GO:0005634	nucleus	cellular_component	6	ENSG00000248592;ENSG00000197275;ENSG00000150687;ENSG00000029153;ENSG00000117152;ENSG00000143401;ENSG00000270181;ENSG00000213626;ENSG00000205362;ENSG00000272410;ENSG00000022267;ENSG00000176101;ENSG00000196693;ENSG00000079263;ENSG00000171456;ENSG00000125743;ENSG00000163349;ENSG00000101126;ENSG00000280987;ENSG00000170100;ENSG00000015479;ENSG00000165156;ENSG00000139675;ENSG00000134986;ENSG00000181450…	40	102	6183	17212	0.275008
GO:0035580	specific granule lumen	cellular_component	8	ENSG00000171302	1	102	55	17212	0.279219
GO:0036498	IRE1-mediated unfolded protein response	biological_process	6	ENSG00000124783	1	102	55	17212	0.279219
GO:2000134	negative regulation of G1/S transition of mitotic cell cycle	biological_process	10	ENSG00000022267	1	102	55	17212	0.279219
GO:0005741	mitochondrial outer membrane	cellular_component	6	ENSG00000129473;ENSG00000135093	2	102	177	17212	0.282362
GO:0003676	nucleic acid binding	molecular_function	5	ENSG00000196693;ENSG00000101126;ENSG00000181450;ENSG00000165156;ENSG00000015479;ENSG00000090612;ENSG00000280987;ENSG00000170100;ENSG00000197037;ENSG00000139675	10	102	1357	17212	0.283088
GO:0009967	positive regulation of signal transduction	biological_process	8	ENSG00000004139	1	102	56	17212	0.283504
GO:0032508	DNA duplex unwinding	biological_process	9	ENSG00000197275	1	102	56	17212	0.283504
GO:0042472	inner ear morphogenesis	biological_process	6	ENSG00000126778	1	102	56	17212	0.283504
GO:0000045	autophagosome assembly	biological_process	7	ENSG00000139112	1	102	57	17212	0.287764
GO:0048666	neuron development	biological_process	6	ENSG00000060237	1	102	57	17212	0.287764
GO:0019003	GDP binding	molecular_function	8	ENSG00000143761	1	102	57	17212	0.287764
GO:0022008	neurogenesis	biological_process	6	ENSG00000126778	1	102	57	17212	0.287764
GO:0060348	bone development	biological_process	6	ENSG00000171456	1	102	57	17212	0.287764
GO:0010972	negative regulation of G2/M transition of mitotic cell cycle	biological_process	10	ENSG00000022267	1	102	58	17212	0.291999
GO:0051015	actin filament binding	molecular_function	7	ENSG00000162704;ENSG00000173210	2	102	182	17212	0.293333
GO:0008168	methyltransferase activity	molecular_function	6	ENSG00000152455;ENSG00000119772	2	102	183	17212	0.295525
GO:0043408	regulation of MAPK cascade	biological_process	10	ENSG00000213626	1	102	59	17212	0.296209
GO:0035861	site of double-strand break	cellular_component	7	ENSG00000162704	1	102	59	17212	0.296209
GO:0045669	positive regulation of osteoblast differentiation	biological_process	8	ENSG00000162733	1	102	59	17212	0.296209
GO:0006694	steroid biosynthetic process	biological_process	7	ENSG00000109929	1	102	59	17212	0.296209
GO:0043086	negative regulation of catalytic activity	biological_process	6	ENSG00000143401	1	102	59	17212	0.296209
GO:0005778	peroxisomal membrane	cellular_component	8	ENSG00000143761	1	102	59	17212	0.296209
GO:0007389	pattern specification process	biological_process	4	ENSG00000126778	1	102	59	17212	0.296209
GO:0005198	structural molecule activity	molecular_function	3	ENSG00000015479;ENSG00000167552	2	102	184	17212	0.297717
GO:0030900	forebrain development	biological_process	5	ENSG00000166225	1	102	60	17212	0.300394
GO:0005768	endosome	cellular_component	7	ENSG00000089063;ENSG00000162704;ENSG00000085365;ENSG00000058063;ENSG00000131374	5	102	617	17212	0.302917
GO:0051965	positive regulation of synapse assembly	biological_process	7	ENSG00000101126	1	102	62	17212	0.30869
GO:0019005	SCF ubiquitin ligase complex	cellular_component	7	ENSG00000145743	1	102	62	17212	0.30869
GO:0008284	positive regulation of cell population proliferation	biological_process	7	ENSG00000162733;ENSG00000124783;ENSG00000163349;ENSG00000090612	4	102	475	17212	0.310639
GO:0006355	regulation of transcription, DNA-templated	biological_process	8	ENSG00000181450;ENSG00000079263;ENSG00000213626;ENSG00000090612;ENSG00000196693;ENSG00000197037;ENSG00000126778;ENSG00000171456;ENSG00000029153;ENSG00000170100	10	102	1393	17212	0.310985
GO:0018107	peptidyl-threonine phosphorylation	biological_process	10	ENSG00000060237	1	102	63	17212	0.312802
GO:0030136	clathrin-coated vesicle	cellular_component	8	ENSG00000085365	1	102	63	17212	0.312802
GO:0016925	protein sumoylation	biological_process	11	ENSG00000214717	1	102	63	17212	0.312802
GO:0006644	phospholipid metabolic process	biological_process	7	ENSG00000147535	1	102	64	17212	0.316889
GO:0030173	integral component of Golgi membrane	cellular_component	7	ENSG00000258881	1	102	64	17212	0.316889
GO:0005874	microtubule	cellular_component	7	ENSG00000167552;ENSG00000139112;ENSG00000004139	3	102	335	17212	0.319252
GO:0046872	metal ion binding	molecular_function	6	ENSG00000181450;ENSG00000145860;ENSG00000171385;ENSG00000171302;ENSG00000171456;ENSG00000058063;ENSG00000022267;ENSG00000173210;ENSG00000211455;ENSG00000196693;ENSG00000101126;ENSG00000170100;ENSG00000152455;ENSG00000165156;ENSG00000015479;ENSG00000214717;ENSG00000205362;ENSG00000214357;ENSG00000090612;ENSG00000197037;ENSG00000197713;ENSG00000079263;ENSG00000119772	23	102	3499	17212	0.324657
GO:0043066	negative regulation of apoptotic process	biological_process	9	ENSG00000129473;ENSG00000126778;ENSG00000159251;ENSG00000090612	4	102	486	17212	0.325421
GO:0045087	innate immune response	biological_process	5	ENSG00000015479;ENSG00000129657;ENSG00000004139	3	102	339	17212	0.325751
GO:0032259	methylation	biological_process	4	ENSG00000152455;ENSG00000119772	2	102	198	17212	0.328263
GO:0051291	protein heterooligomerization	biological_process	8	ENSG00000138758	1	102	67	17212	0.329008
GO:0007224	smoothened signaling pathway	biological_process	6	ENSG00000163349	1	102	68	17212	0.333
GO:0030097	hemopoiesis	biological_process	7	ENSG00000171456	1	102	68	17212	0.333
GO:0009749	response to glucose	biological_process	9	ENSG00000004139	1	102	68	17212	0.333
GO:0005267	potassium channel activity	molecular_function	8	ENSG00000171385	1	102	68	17212	0.333
GO:0005840	ribosome	cellular_component	6	ENSG00000159111;ENSG00000198015	2	102	202	17212	0.336932
GO:0036464	cytoplasmic ribonucleoprotein granule	cellular_component	7	ENSG00000167552	1	102	69	17212	0.336968
GO:0032091	negative regulation of protein binding	biological_process	7	ENSG00000101126	1	102	69	17212	0.336968
GO:0030855	epithelial cell differentiation	biological_process	6	ENSG00000126778	1	102	69	17212	0.336968
GO:0050727	regulation of inflammatory response	biological_process	8	ENSG00000003989	1	102	70	17212	0.340913
GO:0038096	Fc-gamma receptor signaling pathway involved in phagocytosis	biological_process	8	ENSG00000162704	1	102	72	17212	0.348733
GO:0030672	synaptic vesicle membrane	cellular_component	4	ENSG00000085365	1	102	72	17212	0.348733
GO:0030512	negative regulation of transforming growth factor beta receptor signaling pathway	biological_process	10	ENSG00000106819	1	102	73	17212	0.352609
GO:0008543	fibroblast growth factor receptor signaling pathway	biological_process	8	ENSG00000166225	1	102	74	17212	0.356462
GO:0006661	phosphatidylinositol biosynthetic process	biological_process	10	ENSG00000143761	1	102	74	17212	0.356462
GO:0031410	cytoplasmic vesicle	cellular_component	6	ENSG00000139112;ENSG00000089063;ENSG00000125841;ENSG00000143401;ENSG00000131374	5	102	664	17212	0.358113
GO:0003779	actin binding	molecular_function	6	ENSG00000162704;ENSG00000211455;ENSG00000173210	3	102	359	17212	0.358221
GO:0005975	carbohydrate metabolic process	biological_process	5	ENSG00000260729;ENSG00000197713	2	102	212	17212	0.358458
GO:0004197	cysteine-type endopeptidase activity	molecular_function	8	ENSG00000135093	1	102	75	17212	0.360292
GO:0008076	voltage-gated potassium channel complex	cellular_component	9	ENSG00000171385	1	102	76	17212	0.3641
GO:0030175	filopodium	cellular_component	7	ENSG00000159251	1	102	76	17212	0.3641
GO:0005884	actin filament	cellular_component	7	ENSG00000159251	1	102	76	17212	0.3641
GO:0042147	retrograde transport, endosome to Golgi	biological_process	8	ENSG00000131374	1	102	76	17212	0.3641
GO:0005525	GTP binding	molecular_function	8	ENSG00000167552;ENSG00000138758;ENSG00000143761	3	102	363	17212	0.364698
GO:0030154	cell differentiation	biological_process	5	ENSG00000022267;ENSG00000165156;ENSG00000152455;ENSG00000090612;ENSG00000004139;ENSG00000162733	6	102	826	17212	0.365038
GO:0030424	axon	cellular_component	6	ENSG00000101126;ENSG00000004139;ENSG00000138758	3	102	364	17212	0.366316
GO:0031594	neuromuscular junction	cellular_component	4	ENSG00000167552	1	102	77	17212	0.367885
GO:0006469	negative regulation of protein kinase activity	biological_process	11	ENSG00000060237	1	102	78	17212	0.371647
GO:0006952	defense response	biological_process	5	ENSG00000079263	1	102	80	17212	0.379107
GO:0071277	cellular response to calcium ion	biological_process	8	ENSG00000060237	1	102	80	17212	0.379107
GO:0016887	ATPase activity	molecular_function	9	ENSG00000159251;ENSG00000282034	2	102	223	17212	0.381844
GO:0035579	specific granule membrane	cellular_component	8	ENSG00000085365	1	102	81	17212	0.382803
GO:0043085	positive regulation of catalytic activity	biological_process	6	ENSG00000143761	1	102	81	17212	0.382803
GO:0000790	nuclear chromatin	cellular_component	7	ENSG00000171456;ENSG00000213999	2	102	224	17212	0.383954
GO:0001228	DNA-binding transcription activator activity, RNA polymerase II-specific	molecular_function	6	ENSG00000213999;ENSG00000214717;ENSG00000126778	3	102	375	17212	0.384066
GO:0050731	positive regulation of peptidyl-tyrosine phosphorylation	biological_process	11	ENSG00000101126	1	102	82	17212	0.386478
GO:0005739	mitochondrion	cellular_component	6	ENSG00000159111;ENSG00000125871;ENSG00000135093;ENSG00000004139;ENSG00000129473;ENSG00000079263;ENSG00000077713;ENSG00000198015;ENSG00000255154;ENSG00000139112	10	102	1491	17212	0.389774
GO:0000724	double-strand break repair via homologous recombination	biological_process	10	ENSG00000197275	1	102	83	17212	0.390131
GO:0004519	endonuclease activity	molecular_function	7	ENSG00000270181	1	102	83	17212	0.390131
GO:0045892	negative regulation of transcription, DNA-templated	biological_process	9	ENSG00000165156;ENSG00000213626;ENSG00000152455;ENSG00000126778	4	102	534	17212	0.390232
GO:0043005	neuron projection	cellular_component	5	ENSG00000143761;ENSG00000125841;ENSG00000162704	3	102	379	17212	0.390495
GO:0006281	DNA repair	biological_process	8	ENSG00000270181;ENSG00000197275;ENSG00000125871	3	102	380	17212	0.3921
GO:0032580	Golgi cisterna membrane	cellular_component	8	ENSG00000171302	1	102	84	17212	0.393763
GO:0071013	catalytic step 2 spliceosome	cellular_component	7	ENSG00000125743	1	102	84	17212	0.393763
GO:0048013	ephrin receptor signaling pathway	biological_process	8	ENSG00000162704	1	102	84	17212	0.393763
GO:0003714	transcription corepressor activity	molecular_function	5	ENSG00000119772;ENSG00000165156	2	102	231	17212	0.39863
GO:0004672	protein kinase activity	molecular_function	7	ENSG00000163349;ENSG00000162733;ENSG00000060237;ENSG00000211455	4	102	541	17212	0.399657
GO:0032588	trans-Golgi network membrane	cellular_component	8	ENSG00000085365	1	102	86	17212	0.400962
GO:0043025	neuronal cell body	cellular_component	5	ENSG00000171385;ENSG00000101126;ENSG00000125841	3	102	386	17212	0.401709
GO:0007623	circadian rhythm	biological_process	4	ENSG00000029153	1	102	87	17212	0.40453
GO:0000902	cell morphogenesis	biological_process	6	ENSG00000171456	1	102	87	17212	0.40453
GO:0019886	antigen processing and presentation of exogenous peptide antigen via MHC class II	biological_process	7	ENSG00000143761	1	102	87	17212	0.40453
GO:0004843	thiol-dependent ubiquitin-specific protease activity	molecular_function	10	ENSG00000135093	1	102	87	17212	0.40453
GO:0016021	integral component of membrane	cellular_component	5	ENSG00000184307;ENSG00000089063;ENSG00000267368;ENSG00000129473;ENSG00000259075;ENSG00000248592;ENSG00000124783;ENSG00000176142;ENSG00000085365;ENSG00000100100;ENSG00000058063;ENSG00000080031;ENSG00000258881;ENSG00000145860;ENSG00000253767;ENSG00000147535;ENSG00000135093;ENSG00000162733;ENSG00000171302;ENSG00000139291;ENSG00000003989;ENSG00000205236;ENSG00000180089;ENSG00000109929;ENSG00000163866…	29	102	4645	17212	0.407582
GO:0036459	thiol-dependent ubiquitinyl hydrolase activity	molecular_function	9	ENSG00000135093	1	102	88	17212	0.408077
GO:0019216	regulation of lipid metabolic process	biological_process	7	ENSG00000177200	1	102	88	17212	0.408077
GO:0031146	SCF-dependent proteasomal ubiquitin-dependent protein catabolic process	biological_process	12	ENSG00000145743	1	102	90	17212	0.415108
GO:0009952	anterior/posterior pattern specification	biological_process	6	ENSG00000163349	1	102	90	17212	0.415108
GO:0045944	positive regulation of transcription by RNA polymerase II	biological_process	10	ENSG00000171456;ENSG00000126778;ENSG00000029153;ENSG00000213999;ENSG00000214717;ENSG00000090612;ENSG00000173210	7	102	1035	17212	0.415792
GO:0016567	protein ubiquitination	biological_process	11	ENSG00000065802;ENSG00000214357;ENSG00000145743;ENSG00000145860	4	102	554	17212	0.417098
GO:0009636	response to toxic substance	biological_process	5	ENSG00000119772	1	102	91	17212	0.418592
GO:0016579	protein deubiquitination	biological_process	9	ENSG00000171456;ENSG00000135093	2	102	244	17212	0.425454
GO:0090630	activation of GTPase activity	biological_process	9	ENSG00000131374	1	102	93	17212	0.425499
GO:0007160	cell-matrix adhesion	biological_process	6	ENSG00000162733	1	102	94	17212	0.428922
GO:0016787	hydrolase activity	molecular_function	4	ENSG00000125871;ENSG00000150687;ENSG00000147535;ENSG00000177200;ENSG00000171302;ENSG00000197275;ENSG00000080031;ENSG00000244255;ENSG00000180089;ENSG00000135093	10	102	1544	17212	0.433211
GO:0030133	transport vesicle	cellular_component	7	ENSG00000125841	1	102	96	17212	0.435708
GO:0005913	cell-cell adherens junction	cellular_component	5	ENSG00000166225	1	102	96	17212	0.435708
GO:0035335	peptidyl-tyrosine dephosphorylation	biological_process	10	ENSG00000080031	1	102	97	17212	0.439071
GO:0042254	ribosome biogenesis	biological_process	6	ENSG00000159111	1	102	97	17212	0.439071
GO:0001503	ossification	biological_process	4	ENSG00000162733	1	102	97	17212	0.439071
GO:0004674	protein serine/threonine kinase activity	molecular_function	8	ENSG00000163349;ENSG00000060237;ENSG00000211455	3	102	410	17212	0.439692
GO:0004725	protein tyrosine phosphatase activity	molecular_function	9	ENSG00000080031	1	102	98	17212	0.442414
GO:0032355	response to estradiol	biological_process	6	ENSG00000119772	1	102	99	17212	0.445737
GO:0072562	blood microparticle	cellular_component	4	ENSG00000159251	1	102	99	17212	0.445737
GO:0003697	single-stranded DNA binding	molecular_function	7	ENSG00000270181	1	102	99	17212	0.445737
GO:0030425	dendrite	cellular_component	6	ENSG00000171385;ENSG00000004139;ENSG00000101126	3	102	420	17212	0.455262
GO:0019904	protein domain specific binding	molecular_function	5	ENSG00000167552;ENSG00000143761	2	102	260	17212	0.457609
GO:0051028	mRNA transport	biological_process	10	ENSG00000139675	1	102	104	17212	0.462061
GO:0051091	positive regulation of DNA-binding transcription factor activity	biological_process	6	ENSG00000162733	1	102	104	17212	0.462061
GO:0042383	sarcolemma	cellular_component	5	ENSG00000171385	1	102	106	17212	0.468457
GO:0007015	actin filament organization	biological_process	6	ENSG00000143761	1	102	106	17212	0.468457
GO:0030176	integral component of endoplasmic reticulum membrane	cellular_component	7	ENSG00000258881	1	102	106	17212	0.468457
GO:0000166	nucleotide binding	molecular_function	5	ENSG00000159251;ENSG00000197275;ENSG00000167552;ENSG00000211455;ENSG00000060237;ENSG00000177200;ENSG00000058063;ENSG00000162733;ENSG00000163349;ENSG00000143761;ENSG00000138758	11	102	1756	17212	0.470435
GO:0000122	negative regulation of transcription by RNA polymerase II	biological_process	10	ENSG00000090612;ENSG00000126778;ENSG00000165156;ENSG00000119772;ENSG00000152455	5	102	761	17212	0.472196
GO:0034774	secretory granule lumen	cellular_component	7	ENSG00000162704	1	102	108	17212	0.474777
GO:0005743	mitochondrial inner membrane	cellular_component	6	ENSG00000198015;ENSG00000077713;ENSG00000159111	3	102	434	17212	0.47676
GO:0008270	zinc ion binding	molecular_function	8	ENSG00000145860;ENSG00000152455;ENSG00000015479;ENSG00000280987;ENSG00000205362	5	102	765	17212	0.476806
GO:0005096	GTPase activator activity	molecular_function	6	ENSG00000117152;ENSG00000131374	2	102	271	17212	0.479116
GO:0042826	histone deacetylase binding	molecular_function	6	ENSG00000213999	1	102	110	17212	0.481023
GO:0098794	postsynapse	cellular_component	4	ENSG00000138758	1	102	111	17212	0.484118
GO:0004713	protein tyrosine kinase activity	molecular_function	8	ENSG00000162733	1	102	112	17212	0.487195
GO:0000151	ubiquitin ligase complex	cellular_component	5	ENSG00000065802	1	102	112	17212	0.487195
GO:0001822	kidney development	biological_process	6	ENSG00000126778	1	102	112	17212	0.487195
GO:0071805	potassium ion transmembrane transport	biological_process	10	ENSG00000171385	1	102	113	17212	0.490254
GO:0007219	Notch signaling pathway	biological_process	6	ENSG00000214357	1	102	113	17212	0.490254
GO:0016324	apical plasma membrane	cellular_component	5	ENSG00000162733;ENSG00000080031	2	102	277	17212	0.49063
GO:0010976	positive regulation of neuron projection development	biological_process	11	ENSG00000101126	1	102	114	17212	0.493295
GO:0030308	negative regulation of cell growth	biological_process	7	ENSG00000022267	1	102	114	17212	0.493295
GO:0031902	late endosome membrane	cellular_component	9	ENSG00000280148	1	102	114	17212	0.493295
GO:0005524	ATP binding	molecular_function	5	ENSG00000282034;ENSG00000163349;ENSG00000162733;ENSG00000060237;ENSG00000177200;ENSG00000159251;ENSG00000211455;ENSG00000197275;ENSG00000058063	9	102	1451	17212	0.494249
GO:0005856	cytoskeleton	cellular_component	6	ENSG00000176101;ENSG00000139112;ENSG00000162704;ENSG00000159251;ENSG00000167552;ENSG00000138758;ENSG00000126391;ENSG00000211455	8	102	1284	17212	0.494949
GO:0030054	cell junction	cellular_component	3	ENSG00000003989;ENSG00000004139;ENSG00000138758;ENSG00000089063;ENSG00000143761	5	102	781	17212	0.495116
GO:0000226	microtubule cytoskeleton organization	biological_process	7	ENSG00000167552	1	102	115	17212	0.496317
GO:0008202	steroid metabolic process	biological_process	6	ENSG00000109929	1	102	115	17212	0.496317
GO:0006887	exocytosis	biological_process	7	ENSG00000085365	1	102	115	17212	0.496317
GO:0035556	intracellular signal transduction	biological_process	5	ENSG00000065802;ENSG00000060237;ENSG00000211455	3	102	447	17212	0.496377
GO:0000187	activation of MAPK activity	biological_process	13	ENSG00000166225	1	102	116	17212	0.499322
GO:0008380	RNA splicing	biological_process	10	ENSG00000139675;ENSG00000125743	2	102	284	17212	0.503862
GO:0005506	iron ion binding	molecular_function	8	ENSG00000109929	1	102	119	17212	0.508231
GO:0005923	bicellular tight junction	cellular_component	6	ENSG00000285130	1	102	120	17212	0.511166
GO:0002376	immune system process	biological_process	3	ENSG00000129657;ENSG00000004139;ENSG00000015479	3	102	457	17212	0.511221
GO:0006468	protein phosphorylation	biological_process	9	ENSG00000162733;ENSG00000060237;ENSG00000211455;ENSG00000163349	4	102	628	17212	0.513564
GO:0042493	response to drug	biological_process	5	ENSG00000159251;ENSG00000119772	2	102	290	17212	0.515029
GO:0036064	ciliary basal body	cellular_component	7	ENSG00000176101	1	102	122	17212	0.516983
GO:0003723	RNA binding	molecular_function	6	ENSG00000198015;ENSG00000143761;ENSG00000125743;ENSG00000139675;ENSG00000159111;ENSG00000103353;ENSG00000280987;ENSG00000015479;ENSG00000178252	9	102	1479	17212	0.517896
GO:0005737	cytoplasm	cellular_component	5	ENSG00000176101;ENSG00000117152;ENSG00000180089;ENSG00000178252;ENSG00000129473;ENSG00000177200;ENSG00000079263;ENSG00000101126;ENSG00000125743;ENSG00000004139;ENSG00000147535;ENSG00000060237;ENSG00000129657;ENSG00000166225;ENSG00000022267;ENSG00000166801;ENSG00000211455;ENSG00000126778;ENSG00000080031;ENSG00000143401;ENSG00000167552;ENSG00000119772;ENSG00000134986;ENSG00000139112;ENSG00000138758…	37	102	6207	17212	0.519552
GO:0018108	peptidyl-tyrosine phosphorylation	biological_process	10	ENSG00000162733	1	102	124	17212	0.522732
GO:0006813	potassium ion transport	biological_process	9	ENSG00000171385	1	102	124	17212	0.522732
GO:0007605	sensory perception of sound	biological_process	8	ENSG00000126778	1	102	125	17212	0.52558
GO:0016853	isomerase activity	molecular_function	4	ENSG00000197713	1	102	125	17212	0.52558
GO:0072659	protein localization to plasma membrane	biological_process	8	ENSG00000184307	1	102	128	17212	0.534026
GO:0008233	peptidase activity	molecular_function	5	ENSG00000135093;ENSG00000150687;ENSG00000244255	3	102	474	17212	0.53593
GO:1901796	regulation of signal transduction by p53 class mediator	biological_process	9	ENSG00000163349	1	102	129	17212	0.536808
GO:0005244	voltage-gated ion channel activity	molecular_function	9	ENSG00000171385	1	102	129	17212	0.536808
GO:0008021	synaptic vesicle	cellular_component	4	ENSG00000089063	1	102	130	17212	0.539574
GO:0061024	membrane organization	biological_process	5	ENSG00000162704	1	102	130	17212	0.539574
GO:0046982	protein heterodimerization activity	molecular_function	6	ENSG00000165156;ENSG00000129473;ENSG00000143761	3	102	479	17212	0.543065
GO:0032991	protein-containing complex	cellular_component	3	ENSG00000117152;ENSG00000213626;ENSG00000143761;ENSG00000178252	4	102	653	17212	0.544579
GO:0007050	cell cycle arrest	biological_process	5	ENSG00000178252	1	102	133	17212	0.547773
GO:0008234	cysteine-type peptidase activity	molecular_function	7	ENSG00000135093	1	102	134	17212	0.550474
GO:0034765	regulation of ion transmembrane transport	biological_process	8	ENSG00000171385	1	102	135	17212	0.553159
GO:0006869	lipid transport	biological_process	7	ENSG00000058063	1	102	135	17212	0.553159
GO:0007399	nervous system development	biological_process	6	ENSG00000145743;ENSG00000125841;ENSG00000004139	3	102	488	17212	0.55575
GO:0030426	growth cone	cellular_component	5	ENSG00000162704	1	102	136	17212	0.555828
GO:0006412	translation	biological_process	8	ENSG00000198015;ENSG00000159111	2	102	313	17212	0.556295
GO:0045766	positive regulation of angiogenesis	biological_process	8	ENSG00000163349	1	102	137	17212	0.558481
GO:0042802	identical protein binding	molecular_function	5	ENSG00000197713;ENSG00000214717;ENSG00000129473;ENSG00000015479;ENSG00000176101;ENSG00000119772	6	102	1015	17212	0.562154
GO:0090263	positive regulation of canonical Wnt signaling pathway	biological_process	10	ENSG00000060237	1	102	140	17212	0.566347
GO:0004721	phosphoprotein phosphatase activity	molecular_function	8	ENSG00000080031	1	102	143	17212	0.574074
GO:0016301	kinase activity	molecular_function	6	ENSG00000060237;ENSG00000162733;ENSG00000163349;ENSG00000211455	4	102	679	17212	0.575758
GO:0003824	catalytic activity	molecular_function	3	ENSG00000270181;ENSG00000197713;ENSG00000286112	3	102	505	17212	0.579143
GO:0043197	dendritic spine	cellular_component	7	ENSG00000138758	1	102	145	17212	0.579149
GO:0016310	phosphorylation	biological_process	7	ENSG00000162733;ENSG00000163349;ENSG00000211455;ENSG00000060237	4	102	684	17212	0.581618
GO:0017137	Rab GTPase binding	molecular_function	9	ENSG00000131374	1	102	147	17212	0.584165
GO:0031966	mitochondrial membrane	cellular_component	5	ENSG00000129473	1	102	147	17212	0.584165
GO:0043687	post-translational protein modification	biological_process	9	ENSG00000065802;ENSG00000150687	2	102	333	17212	0.590137
GO:0016829	lyase activity	molecular_function	4	ENSG00000255154	1	102	150	17212	0.591577
GO:0016740	transferase activity	molecular_function	4	ENSG00000145860;ENSG00000152455;ENSG00000163349;ENSG00000060237;ENSG00000214357;ENSG00000184307;ENSG00000211455;ENSG00000119772;ENSG00000162733;ENSG00000259075	10	102	1745	17212	0.593119
GO:0050852	T cell receptor signaling pathway	biological_process	8	ENSG00000060237	1	102	152	17212	0.596446
GO:0005783	endoplasmic reticulum	cellular_component	6	ENSG00000139112;ENSG00000058063;ENSG00000145860;ENSG00000089063;ENSG00000184307;ENSG00000109929;ENSG00000124783;ENSG00000171302	8	102	1405	17212	0.599657
GO:0007156	homophilic cell adhesion via plasma membrane adhesion molecules	biological_process	7	ENSG00000253767	1	102	154	17212	0.601257
GO:0006631	fatty acid metabolic process	biological_process	9	ENSG00000255154	1	102	156	17212	0.606012
GO:0016746	transferase activity, transferring acyl groups	molecular_function	5	ENSG00000184307	1	102	157	17212	0.608368
GO:0003729	mRNA binding	molecular_function	7	ENSG00000139675	1	102	157	17212	0.608368
GO:0006886	intracellular protein transport	biological_process	10	ENSG00000131374;ENSG00000143761	2	102	346	17212	0.611102
GO:0005216	ion channel activity	molecular_function	6	ENSG00000171385	1	102	159	17212	0.613039
GO:0051897	positive regulation of protein kinase B signaling	biological_process	10	ENSG00000166225	1	102	160	17212	0.615353
GO:0030246	carbohydrate binding	molecular_function	4	ENSG00000259075	1	102	162	17212	0.619941
GO:0006260	DNA replication	biological_process	8	ENSG00000166801	1	102	164	17212	0.624475
GO:0005911	cell-cell junction	cellular_component	4	ENSG00000166225	1	102	168	17212	0.633383
GO:0016311	dephosphorylation	biological_process	7	ENSG00000080031	1	102	168	17212	0.633383
GO:0007568	aging	biological_process	4	ENSG00000119772	1	102	168	17212	0.633383
GO:0043123	positive regulation of I-kappaB kinase/NF-kappaB signaling	biological_process	10	ENSG00000171302	1	102	169	17212	0.635577
GO:0051607	defense response to virus	biological_process	5	ENSG00000166801	1	102	171	17212	0.639926
GO:0006397	mRNA processing	biological_process	10	ENSG00000125743;ENSG00000139675	2	102	366	17212	0.641764
GO:0006486	protein glycosylation	biological_process	9	ENSG00000259075	1	102	172	17212	0.642081
GO:0005789	endoplasmic reticulum membrane	cellular_component	5	ENSG00000145860;ENSG00000109929;ENSG00000171302;ENSG00000180089;ENSG00000124783	5	102	927	17212	0.64862
GO:0060271	cilium assembly	biological_process	7	ENSG00000173210	1	102	176	17212	0.650575
GO:0042995	cell projection	cellular_component	4	ENSG00000162704;ENSG00000171385;ENSG00000004139;ENSG00000080031;ENSG00000138758	5	102	934	17212	0.655225
GO:0006508	proteolysis	biological_process	7	ENSG00000150687;ENSG00000244255;ENSG00000135093	3	102	567	17212	0.657751
GO:0006888	endoplasmic reticulum to Golgi vesicle-mediated transport	biological_process	7	ENSG00000258881	1	102	180	17212	0.658869
GO:0005635	nuclear envelope	cellular_component	6	ENSG00000079263	1	102	183	17212	0.664962
GO:0043235	receptor complex	cellular_component	4	ENSG00000162733	1	102	183	17212	0.664962
GO:0005516	calmodulin binding	molecular_function	5	ENSG00000117152	1	102	184	17212	0.666969
GO:0006470	protein dephosphorylation	biological_process	9	ENSG00000080031	1	102	185	17212	0.668964
GO:0043161	proteasome-mediated ubiquitin-dependent protein catabolic process	biological_process	11	ENSG00000145743	1	102	187	17212	0.672918
GO:0007283	spermatogenesis	biological_process	7	ENSG00000119772;ENSG00000129473	2	102	388	17212	0.673288
GO:0055085	transmembrane transport	biological_process	6	ENSG00000003989;ENSG00000077713;ENSG00000171385	3	102	586	17212	0.679655
GO:0006357	regulation of transcription by RNA polymerase II	biological_process	9	ENSG00000101126;ENSG00000170100;ENSG00000029153;ENSG00000181450;ENSG00000197037;ENSG00000196693	6	102	1153	17212	0.686672
GO:0051301	cell division	biological_process	4	ENSG00000138758;ENSG00000167552	2	102	399	17212	0.688199
GO:0006811	ion transport	biological_process	6	ENSG00000058063;ENSG00000060237;ENSG00000171385	3	102	597	17212	0.691863
GO:0007411	axon guidance	biological_process	6	ENSG00000166225	1	102	197	17212	0.691999
GO:0045893	positive regulation of transcription, DNA-templated	biological_process	9	ENSG00000029153;ENSG00000126778;ENSG00000213626	3	102	600	17212	0.695132
GO:0005887	integral component of plasma membrane	cellular_component	6	ENSG00000166225;ENSG00000147535;ENSG00000080031;ENSG00000162733;ENSG00000253767;ENSG00000003989	6	102	1166	17212	0.697157
GO:0008285	negative regulation of cell population proliferation	biological_process	7	ENSG00000178252;ENSG00000090612	2	102	407	17212	0.698693
GO:0051260	protein homooligomerization	biological_process	8	ENSG00000171385	1	102	201	17212	0.699319
GO:0044267	cellular protein metabolic process	biological_process	7	ENSG00000150687	1	102	206	17212	0.708227
GO:0000139	Golgi membrane	cellular_component	7	ENSG00000143761;ENSG00000085365;ENSG00000259075	3	102	619	17212	0.715238
GO:0045121	membrane raft	cellular_component	6	ENSG00000167552	1	102	212	17212	0.718573
GO:0016757	transferase activity, transferring glycosyl groups	molecular_function	5	ENSG00000259075	1	102	214	17212	0.72194
GO:0016477	cell migration	biological_process	6	ENSG00000162704	1	102	214	17212	0.72194
GO:0007049	cell cycle	biological_process	4	ENSG00000178252;ENSG00000152455;ENSG00000138758	3	102	636	17212	0.732361
GO:0030335	positive regulation of cell migration	biological_process	8	ENSG00000090612	1	102	221	17212	0.733413
GO:0005509	calcium ion binding	molecular_function	7	ENSG00000171302;ENSG00000253767;ENSG00000106819	3	102	640	17212	0.736272
GO:0010008	endosome membrane	cellular_component	8	ENSG00000131374	1	102	224	17212	0.738186
GO:0030198	extracellular matrix organization	biological_process	6	ENSG00000162733	1	102	225	17212	0.739758
GO:0015031	protein transport	biological_process	9	ENSG00000131374;ENSG00000085365;ENSG00000143761	3	102	645	17212	0.741098
GO:0045211	postsynaptic membrane	cellular_component	5	ENSG00000143761	1	102	226	17212	0.741321
GO:0044212	transcription regulatory region DNA binding	molecular_function	7	ENSG00000126778	1	102	229	17212	0.745953
GO:0006915	apoptotic process	biological_process	6	ENSG00000080031;ENSG00000126778;ENSG00000129473	3	102	653	17212	0.748677
GO:0000398	mRNA splicing, via spliceosome	biological_process	13	ENSG00000125743	1	102	234	17212	0.753492
GO:0000209	protein polyubiquitination	biological_process	12	ENSG00000145743	1	102	235	17212	0.754973
GO:0010629	negative regulation of gene expression	biological_process	8	ENSG00000101126	1	102	246	17212	0.770693
GO:0007420	brain development	biological_process	6	ENSG00000117152	1	102	247	17212	0.772072
GO:0031012	extracellular matrix	cellular_component	4	ENSG00000106819	1	102	248	17212	0.773442
GO:0005813	centrosome	cellular_component	7	ENSG00000163349;ENSG00000176101	2	102	479	17212	0.780605
GO:0034220	ion transmembrane transport	biological_process	7	ENSG00000058063	1	102	259	17212	0.787989
GO:0000165	MAPK cascade	biological_process	11	ENSG00000166225	1	102	263	17212	0.793045
GO:0006974	cellular response to DNA damage stimulus	biological_process	6	ENSG00000125871;ENSG00000197275	2	102	496	17212	0.796883
GO:0000977	RNA polymerase II regulatory region sequence-specific DNA binding	molecular_function	9	ENSG00000213999	1	102	268	17212	0.799199
GO:0016192	vesicle-mediated transport	biological_process	6	ENSG00000143761	1	102	270	17212	0.801609
GO:0014069	postsynaptic density	cellular_component	5	ENSG00000143761	1	102	273	17212	0.805171
GO:0003713	transcription coactivator activity	molecular_function	5	ENSG00000171456	1	102	275	17212	0.807511
GO:0006629	lipid metabolic process	biological_process	5	ENSG00000255154;ENSG00000109929	2	102	512	17212	0.811229
GO:0005788	endoplasmic reticulum lumen	cellular_component	7	ENSG00000150687	1	102	280	17212	0.813238
GO:0016020	membrane	cellular_component	3	ENSG00000147535;ENSG00000159251;ENSG00000253767;ENSG00000198015;ENSG00000258881;ENSG00000129473;ENSG00000080031;ENSG00000184307;ENSG00000015479;ENSG00000060237;ENSG00000145860;ENSG00000171302;ENSG00000143761;ENSG00000058063;ENSG00000109929;ENSG00000166225;ENSG00000162733;ENSG00000171385;ENSG00000124783;ENSG00000117152;ENSG00000248592;ENSG00000163866;ENSG00000211455;ENSG00000089063;ENSG00000100100…	39	102	7260	17212	0.818224
GO:0031625	ubiquitin protein ligase binding	molecular_function	7	ENSG00000139112	1	102	287	17212	0.820974
GO:0005765	lysosomal membrane	cellular_component	9	ENSG00000165714	1	102	287	17212	0.820974
GO:0016604	nuclear body	cellular_component	7	ENSG00000079263	1	102	287	17212	0.820974
GO:0006511	ubiquitin-dependent protein catabolic process	biological_process	10	ENSG00000135093	1	102	288	17212	0.822053
GO:0005515	protein binding	molecular_function	4	ENSG00000213626;ENSG00000143761;ENSG00000080031;ENSG00000145743;ENSG00000060237;ENSG00000139645;ENSG00000015479;ENSG00000173210;ENSG00000205362;ENSG00000106819;ENSG00000162704;ENSG00000134986;ENSG00000285130;ENSG00000177200;ENSG00000129473;ENSG00000178252;ENSG00000065802;ENSG00000171385;ENSG00000196693;ENSG00000126391;ENSG00000022267;ENSG00000129657;ENSG00000119772;ENSG00000124783;ENSG00000139112…	56	102	10156	17212	0.828101
GO:0070062	extracellular exosome	cellular_component	7	ENSG00000167552;ENSG00000286140;ENSG00000171302;ENSG00000197713;ENSG00000162704;ENSG00000143761;ENSG00000125743;ENSG00000159251;ENSG00000150687	9	102	1961	17212	0.835347
GO:0045296	cadherin binding	molecular_function	6	ENSG00000103353	1	102	302	17212	0.836499
GO:0043565	sequence-specific DNA binding	molecular_function	7	ENSG00000214717;ENSG00000126778	2	102	544	17212	0.837265
GO:0042803	protein homodimerization activity	molecular_function	6	ENSG00000129473;ENSG00000197713;ENSG00000171302	3	102	786	17212	0.85055
GO:0043547	positive regulation of GTPase activity	biological_process	8	ENSG00000117152	1	102	319	17212	0.852487
GO:0007275	multicellular organism development	biological_process	4	ENSG00000022267;ENSG00000126778;ENSG00000065802;ENSG00000213626	4	102	1007	17212	0.854681
GO:0062023	collagen-containing extracellular matrix	cellular_component	5	ENSG00000106819	1	102	326	17212	0.858611
GO:0007155	cell adhesion	biological_process	4	ENSG00000253767;ENSG00000162733	2	102	574	17212	0.85871
GO:0008283	cell population proliferation	biological_process	3	ENSG00000126778	1	102	329	17212	0.861158
GO:0005730	nucleolus	cellular_component	6	ENSG00000029153;ENSG00000126778;ENSG00000255154	3	102	811	17212	0.865132
GO:0008134	transcription factor binding	molecular_function	5	ENSG00000119772	1	102	345	17212	0.873993
GO:0043065	positive regulation of apoptotic process	biological_process	9	ENSG00000090612	1	102	356	17212	0.882128
GO:0005759	mitochondrial matrix	cellular_component	7	ENSG00000255154	1	102	359	17212	0.884255
GO:0005764	lysosome	cellular_component	8	ENSG00000165714	1	102	370	17212	0.891734
GO:0016607	nuclear speck	cellular_component	8	ENSG00000163349	1	102	386	17212	0.901766
GO:0010628	positive regulation of gene expression	biological_process	8	ENSG00000159251	1	102	391	17212	0.904708
GO:0005829	cytosol	cellular_component	6	ENSG00000145743;ENSG00000139112;ENSG00000065802;ENSG00000125743;ENSG00000143761;ENSG00000159251;ENSG00000060237;ENSG00000166225;ENSG00000163349;ENSG00000129473;ENSG00000117152;ENSG00000004139;ENSG00000167552;ENSG00000178252;ENSG00000176101;ENSG00000197713;ENSG00000129657;ENSG00000211455;ENSG00000131374;ENSG00000022267;ENSG00000205362;ENSG00000090612;ENSG00000162704	23	102	4792	17212	0.906622
GO:0048471	perinuclear region of cytoplasm	cellular_component	6	ENSG00000143761;ENSG00000205362	2	102	663	17212	0.908115
GO:0007186	G protein-coupled receptor signaling pathway	biological_process	5	ENSG00000117152;ENSG00000166225	2	102	689	17212	0.919198
GO:0005815	microtubule organizing center	cellular_component	6	ENSG00000176101	1	102	421	17212	0.920615
GO:0005694	chromosome	cellular_component	6	ENSG00000152455	1	102	448	17212	0.932666
GO:0016032	viral process	biological_process	6	ENSG00000166801	1	102	448	17212	0.932666
GO:0019901	protein kinase binding	molecular_function	7	ENSG00000060237	1	102	450	17212	0.933483
GO:0005886	plasma membrane	cellular_component	4	ENSG00000058063;ENSG00000198015;ENSG00000085365;ENSG00000166225;ENSG00000100100;ENSG00000253767;ENSG00000080031;ENSG00000204422;ENSG00000147535;ENSG00000022267;ENSG00000171385;ENSG00000143761;ENSG00000178252;ENSG00000117152;ENSG00000171302;ENSG00000125841;ENSG00000162733;ENSG00000003989	18	102	4053	17212	0.940409
GO:0043231	intracellular membrane-bounded organelle	cellular_component	5	ENSG00000109929;ENSG00000131374	2	102	753	17212	0.941399
GO:0005654	nucleoplasm	cellular_component	6	ENSG00000152455;ENSG00000125743;ENSG00000214717;ENSG00000163349;ENSG00000171456;ENSG00000177200;ENSG00000119772;ENSG00000254852;ENSG00000159111;ENSG00000129657;ENSG00000079263;ENSG00000286140;ENSG00000165156	13	102	3133	17212	0.946219
GO:0016491	oxidoreductase activity	molecular_function	4	ENSG00000109929	1	102	556	17212	0.965242
GO:0055114	oxidation-reduction process	biological_process	4	ENSG00000109929	1	102	684	17212	0.984214
GO:0005576	extracellular region	cellular_component	3	ENSG00000150687;ENSG00000162704;ENSG00000106819;ENSG00000171302	4	102	1864	17212	0.996745
GO:0005615	extracellular space	cellular_component	4	ENSG00000159251;ENSG00000101126	2	102	1377	17212	0.998042
GO:0007165	signal transduction	biological_process	4	ENSG00000004139;ENSG00000162733	2	102	1394	17212	0.998225

## Sheet: SDF-1+EX-4 vs NC_KEGG
pathway_id	pathway_name	Genes	S gene number	TS gene number	B gene number	TB gene number	pvalue
270	Cysteine and methionine metabolism	ENSG00000119772;ENSG00000286112	2	32	47	6755	0.0205838
5130	Pathogenic Escherichia coli infection	ENSG00000167552;ENSG00000162704	2	32	53	6755	0.0257821
4137	Mitophagy - animal	ENSG00000135093;ENSG00000139112	2	32	64	6755	0.0365263
5100	Bacterial invasion of epithelial cells	ENSG00000162704;ENSG00000138758	2	32	74	6755	0.0475327
450	Selenocompound metabolism	ENSG00000286112	1	32	18	6755	0.082021
100	Steroid biosynthesis	ENSG00000109929	1	32	19	6755	0.0863813
40	Pentose and glucuronate interconversions	ENSG00000197713	1	32	21	6755	0.0950418
30	Pentose phosphate pathway	ENSG00000197713	1	32	28	6755	0.124732
3040	Spliceosome	ENSG00000125743;ENSG00000139675	2	32	132	6755	0.12873
4371	Apelin signaling pathway	ENSG00000139112;ENSG00000213999	2	32	132	6755	0.12873
512	Mucin type O-glycan biosynthesis	ENSG00000259075	1	32	29	6755	0.128895
4136	Autophagy - other	ENSG00000139112	1	32	31	6755	0.137165
5206	MicroRNAs in cancer	ENSG00000129473;ENSG00000119772	2	32	148	6755	0.154745
380	Tryptophan metabolism	ENSG00000286112	1	32	40	6755	0.173447
565	Ether lipid metabolism	ENSG00000180089	1	32	42	6755	0.181307
3440	Homologous recombination	ENSG00000197275	1	32	42	6755	0.181307
4978	Mineral absorption	ENSG00000205362	1	32	46	6755	0.196809
5110	Vibrio cholerae infection	ENSG00000143761	1	32	49	6755	0.208249
5134	Legionellosis	ENSG00000143761	1	32	51	6755	0.215788
561	Glycerolipid metabolism	ENSG00000147535	1	32	54	6755	0.226966
240	Pyrimidine metabolism	ENSG00000171302	1	32	56	6755	0.234332
310	Lysine degradation	ENSG00000152455	1	32	57	6755	0.237989
5204	Chemical carcinogenesis	ENSG00000286112	1	32	62	6755	0.256024
5131	Shigellosis	ENSG00000162704	1	32	64	6755	0.263122
4260	Cardiac muscle contraction	ENSG00000159251	1	32	69	6755	0.28058
5410	Hypertrophic cardiomyopathy (HCM)	ENSG00000159251	1	32	76	6755	0.30435
4144	Endocytosis	ENSG00000143761;ENSG00000162704	2	32	237	6755	0.310132
5132	Salmonella infection	ENSG00000162704	1	32	78	6755	0.311
4727	GABAergic synapse	ENSG00000139112	1	32	78	6755	0.311
5414	Dilated cardiomyopathy (DCM)	ENSG00000159251	1	32	80	6755	0.317589
4540	Gap junction	ENSG00000167552	1	32	84	6755	0.330584
4666	Fc gamma R-mediated phagocytosis	ENSG00000162704	1	32	87	6755	0.340173
564	Glycerophospholipid metabolism	ENSG00000147535	1	32	90	6755	0.349628
5168	Herpes simplex virus 1 infection	ENSG00000196693;ENSG00000170100;ENSG00000090612	3	32	466	6755	0.38132
4722	Neurotrophin signaling pathway	ENSG00000166225	1	32	116	6755	0.42626
4140	Autophagy - animal	ENSG00000139112	1	32	124	6755	0.448025
230	Purine metabolism	ENSG00000171302	1	32	125	6755	0.450689
4068	FoxO signaling pathway	ENSG00000139112	1	32	127	6755	0.455979
3010	Ribosome	ENSG00000159111	1	32	133	6755	0.471555
4210	Apoptosis	ENSG00000167552	1	32	133	6755	0.471555
4145	Phagosome	ENSG00000167552	1	32	135	6755	0.47665
4261	Adrenergic signaling in cardiomyocytes	ENSG00000159251	1	32	135	6755	0.47665
4630	Jak-STAT signaling pathway	ENSG00000022267	1	32	137	6755	0.481698
4072	Phospholipase D signaling pathway	ENSG00000143761	1	32	138	6755	0.484204
4621	NOD-like receptor signaling pathway	ENSG00000139112	1	32	149	6755	0.511008
4218	Cellular senescence	ENSG00000163349	1	32	152	6755	0.518081
4530	Tight junction	ENSG00000167552	1	32	154	6755	0.522741
4022	cGMP-PKG signaling pathway	ENSG00000213999	1	32	156	6755	0.527358
4141	Protein processing in endoplasmic reticulum	ENSG00000124783	1	32	160	6755	0.536461
5202	Transcriptional misregulation in cancer	ENSG00000126778	1	32	169	6755	0.556327
5167	Kaposi sarcoma-associated herpesvirus infection	ENSG00000139112	1	32	170	6755	0.558483
4360	Axon guidance	ENSG00000173210	1	32	179	6755	0.577433
5205	Proteoglycans in cancer	ENSG00000166225	1	32	191	6755	0.601478
4810	Regulation of actin cytoskeleton	ENSG00000162704	1	32	200	6755	0.618637
4714	Thermogenesis	ENSG00000166225	1	32	224	6755	0.660967
