# Supplementary material for: Transcriptome analysis reveals the mechanism of stromal cell-derived factor-1 and exendin-4 synergistically promoted periodontal ligament stem cells osteogenic differentiation
Source: PeerJ. 2021 Aug 27;9:e12091. doi: 10.7717/peerj.12091 (PMC8404574; doi:10.7717/peerj.12091)
Supplement: Supplemental Information 9 — Related to Fig. S3. [file peerj-09-12091-s009.xlsx]

## Sheet: Sheet 1
group
