# Supplementary material for: Transcriptome analysis reveals the mechanism of stromal cell-derived factor-1 and exendin-4 synergistically promoted periodontal ligament stem cells osteogenic differentiation
Source: PeerJ. 2021 Aug 27;9:e12091. doi: 10.7717/peerj.12091 (PMC8404574; doi:10.7717/peerj.12091)
Supplement: Supplemental Information 10 — Functional enrichment analysis of the specific DEGs in each two compared groups (SDF-1 vs NC, EX-4 vs NC, SDF-1+EX-4 vs NC, SDF-1+EX-4 vs SDF-1, EX-4 vs SDF-1). Related to Fig. 3B. [file peerj-09-12091-s010.xlsx]

## Sheet: SDF-1 vs NC
GroupID	Category	Term	Description	LogP	Log(q-value)	InTerm_InList	Genes	Symbols
1_Summary	GO Biological Processes	GO:0009611	response to wounding	-3.13544	0	5/708	4097,5315,5627,6507,29956	MAFG,PKM,PROS1,SLC1A3,CERS2
1_Member	GO Biological Processes	GO:0009611	response to wounding	-3.13544	0	5/708	4097,5315,5627,6507,29956	MAFG,PKM,PROS1,SLC1A3,CERS2
2_Summary	GO Biological Processes	GO:0043414	macromolecule methylation	-2.37026	0	3/318	79066,79624,79918	METTL16,ARMT1,SETD6
2_Member	GO Biological Processes	GO:0043414	macromolecule methylation	-2.37026	0	3/318	79066,79624,79918	METTL16,ARMT1,SETD6
2_Member	GO Biological Processes	GO:0032259	methylation	-2.18476	0	3/371	79066,79624,79918	METTL16,ARMT1,SETD6

## Sheet: EX-4 vs NC
GroupID	Category	Term	Description	LogP	Log(q-value)	InTerm_InList	Genes	Symbols
1_Summary	Canonical Pathways	M19	PID P73PATHWAY	-4.22003	0	3/79	355,1111,5925,1741	FAS,CHEK1,RB1,DLG3
1_Member	Canonical Pathways	M19	PID P73PATHWAY	-4.22003	0	3/79	355,1111,5925	FAS,CHEK1,RB1
1_Member	KEGG Pathway	hsa05165	human papillomavirus infection	-2.33634	0	3/352	355,1741,5925	FAS,DLG3,RB1
2_Summary	GO Biological Processes	GO:0071496	cellular response to external stimulus	-3.4599	0	4/353	355,1111,5899,6715	FAS,CHEK1,RALB,SRD5A1
2_Member	GO Biological Processes	GO:0071496	cellular response to external stimulus	-3.4599	0	4/353	355,1111,5899,6715	FAS,CHEK1,RALB,SRD5A1
2_Member	GO Biological Processes	GO:0009267	cellular response to starvation	-3.29114	0	3/163	355,5899,6715	FAS,RALB,SRD5A1
2_Member	GO Biological Processes	GO:0042594	response to starvation	-2.9964	0	3/206	355,5899,6715	FAS,RALB,SRD5A1
2_Member	GO Biological Processes	GO:0031669	cellular response to nutrient levels	-2.75036	0	3/251	355,5899,6715	FAS,RALB,SRD5A1
2_Member	GO Biological Processes	GO:0031668	cellular response to extracellular stimulus	-2.60669	0	3/282	355,5899,6715	FAS,RALB,SRD5A1
3_Summary	GO Biological Processes	GO:0043254	regulation of protein complex assembly	-2.90456	0	4/497	5899,5925,6047,253260	RALB,RB1,RNF4,RICTOR
3_Member	GO Biological Processes	GO:0043254	regulation of protein complex assembly	-2.90456	0	4/497	5899,5925,6047,253260	RALB,RB1,RNF4,RICTOR
4_Summary	GO Biological Processes	GO:0033044	regulation of chromosome organization	-2.3092	0	3/360	1111,5925,6047	CHEK1,RB1,RNF4
4_Member	GO Biological Processes	GO:0033044	regulation of chromosome organization	-2.3092	0	3/360	1111,5925,6047	CHEK1,RB1,RNF4
5_Summary	Reactome Gene Sets	R-HSA-3700989	Transcriptional Regulation by TP53	-2.29587	0	3/364	355,1111,253260	FAS,CHEK1,RICTOR
5_Member	Reactome Gene Sets	R-HSA-3700989	Transcriptional Regulation by TP53	-2.29587	0	3/364	355,1111,253260	FAS,CHEK1,RICTOR

## Sheet: SDF-1+EX-4 vs NC
GroupID	Category	Term	Description	LogP	Log(q-value)	InTerm_InList	Genes	Symbols
1_Summary	GO Biological Processes	GO:0010507	negative regulation of autophagy	-3.87056	0	3/87	11180,55254,84749	WDR6,TMEM39A,USP30
1_Member	GO Biological Processes	GO:0010507	negative regulation of autophagy	-3.87056	0	3/87	11180,55254,84749	WDR6,TMEM39A,USP30
1_Member	GO Biological Processes	GO:0031330	negative regulation of cellular catabolic process	-2.40205	0	3/280	11180,55254,84749	WDR6,TMEM39A,USP30
1_Member	GO Biological Processes	GO:0009895	negative regulation of catabolic process	-2.22231	0	3/325	11180,55254,84749	WDR6,TMEM39A,USP30
1_Member	GO Biological Processes	GO:0010506	regulation of autophagy	-2.14065	0	3/348	11180,55254,84749	WDR6,TMEM39A,USP30
2_Summary	GO Biological Processes	GO:0022411	cellular component disassembly	-2.39913	0	4/574	28977,55254,84749,124995	MRPL42,TMEM39A,USP30,MRPL10
2_Member	GO Biological Processes	GO:0022411	cellular component disassembly	-2.39913	0	4/574	28977,55254,84749,124995	MRPL42,TMEM39A,USP30,MRPL10
2_Member	GO Biological Processes	GO:0032984	protein-containing complex disassembly	-2.16137	0	3/342	28977,55254,124995	MRPL42,TMEM39A,MRPL10

## Sheet: SDF-1+EX-4 vs SDF-1
GroupID	Category	Term	Description	LogP	Log(q-value)	InTerm_InList	Genes	Symbols
1_Summary	GO Biological Processes	GO:0007219	Notch signaling pathway	-2.92946	0	3/195	5087,5986,23220	PBX1,RFNG,DTX4
1_Member	GO Biological Processes	GO:0007219	Notch signaling pathway	-2.92946	0	3/195	5087,5986,23220	PBX1,RFNG,DTX4
1_Member	Reactome Gene Sets	R-HSA-157118	Signaling by NOTCH	-2.69248	0	3/236	5087,5986,23220	PBX1,RFNG,DTX4
2_Summary	Reactome Gene Sets	R-HSA-446203	Asparagine N-linked glycosylation	-2.38261	0	3/304	4758,89866,440138	NEU1,SEC16B,ALG11
2_Member	Reactome Gene Sets	R-HSA-446203	Asparagine N-linked glycosylation	-2.38261	0	3/304	4758,89866,440138	NEU1,SEC16B,ALG11

## Sheet: EX-4 vs SDF-1
GroupID	Category	Term	Description	LogP	Log(q-value)	InTerm_InList	Genes	Symbols
1_Summary	GO Biological Processes	GO:0010035	response to inorganic substance	-3.03747	0	4/568	493,1906,4548,200894,1859,4515,9997	ATP2B4,EDN1,MTR,ARL13B,DYRK1A,MTCP1,SCO2
1_Member	GO Biological Processes	GO:0010035	response to inorganic substance	-3.03747	0	4/568	493,1906,4548,200894	ATP2B4,EDN1,MTR,ARL13B
1_Member	GO Biological Processes	GO:0018105	peptidyl-serine phosphorylation	-2.75159	0	3/310	493,1859,4515	ATP2B4,DYRK1A,MTCP1
1_Member	GO Biological Processes	GO:0018209	peptidyl-serine modification	-2.66312	0	3/333	493,1859,4515	ATP2B4,DYRK1A,MTCP1
1_Member	GO Biological Processes	GO:0071902	positive regulation of protein serine/threonine kinase activity	-2.60886	0	3/348	493,1906,4515	ATP2B4,EDN1,MTCP1
1_Member	GO Biological Processes	GO:0035690	cellular response to drug	-2.51068	0	3/377	493,1906,4548	ATP2B4,EDN1,MTR
1_Member	GO Biological Processes	GO:0003012	muscle system process	-2.26911	0	3/460	493,1906,9997	ATP2B4,EDN1,SCO2
1_Member	GO Biological Processes	GO:0046394	carboxylic acid biosynthetic process	-2.22799	0	3/476	493,1906,4548	ATP2B4,EDN1,MTR
1_Member	GO Biological Processes	GO:0016053	organic acid biosynthetic process	-2.22547	0	3/477	493,1906,4548	ATP2B4,EDN1,MTR
1_Member	GO Biological Processes	GO:0071900	regulation of protein serine/threonine kinase activity	-2.09513	0	3/532	493,1906,4515	ATP2B4,EDN1,MTCP1
1_Member	GO Biological Processes	GO:0045860	positive regulation of protein kinase activity	-2.07521	0	3/541	493,1906,4515	ATP2B4,EDN1,MTCP1
2_Summary	GO Biological Processes	GO:0048568	embryonic organ development	-2.28759	0	3/453	1906,7005,200894	EDN1,TEAD3,ARL13B
2_Member	GO Biological Processes	GO:0048568	embryonic organ development	-2.28759	0	3/453	1906,7005,200894	EDN1,TEAD3,ARL13B
3_Summary	GO Biological Processes	GO:0030335	positive regulation of cell migration	-2.01967	0	3/567	1906,3554,11116	EDN1,IL1R1,CEP43
3_Member	GO Biological Processes	GO:0030335	positive regulation of cell migration	-2.01967	0	3/567	1906,3554,11116	EDN1,IL1R1,CEP43
