# Supplementary material for: Transcriptome analysis reveals the mechanism of stromal cell-derived factor-1 and exendin-4 synergistically promoted periodontal ligament stem cells osteogenic differentiation
Source: PeerJ. 2021 Aug 27;9:e12091. doi: 10.7717/peerj.12091 (PMC8404574; doi:10.7717/peerj.12091)
Supplement: Supplemental Information 11 — Short Time-series Expression Miner (STEM) analysis in PDLSCs cocultured with SDF-1, EX-4 and SDF-1+EX-4. Related to Fig. 4A. [file peerj-09-12091-s011.xlsx]

## Sheet: defaults_geneTable
gene_name	SPOT	Profile	NC_pdl	S_pdl	E_pdl	SE_pdl
AL136295	1	27	0	0.33	4.12	0
RC3H1	2	16	0	-1.3	0.4	-1.36
ZBTB38	3	27	0	0.02	1.94	0.18
LPP	6	38	0	2.85	2.73	-0.01
BTBD3	7	31	0	1.24	-2.62	-1.04
MIR1244-1	9	3	0	-14.02	-9.53	-14.02
CANT1	10	26	0	-0.09	1.28	-4.28
BLOC1S5-TXNDC5	11	34	0	11.05	-2.15	-2.15
PIK3IP1	12	15	0	-0.74	0.09	-3.93
AC093525	13	12	0	-1.45	-1.64	-1.5
NRSN2	14	36	0	1.75	-1.2	7.97
CHD9	17	28	0	0.41	1.88	1.67
TICAM2	18	34	0	1.21	0.05	0.02
INO80B-WBP1	19	28	0	0	1.2	1.19
AC011448	20	14	0	-1.94	-2.19	1.37
AC008878	30	3	0	-2.8	-1.58	-2.99
MT1A	33	41	0	0.32	1.19	1.5
RPL21P75	34	14	0	-65.53	-42.26	58.2
AL807752	36	39	0	0.57	0.55	1.83
AC118553	37	19	0	-0.93	0.59	-0.59
GABARAPL1	38	0	0	-9.33	-11.24	-7.95
ZNF664	40	5	0	-8.88	-5.4	-1.88
PTGES3L-AARSD1	41	19	0	-0.36	0.7	-0.74
TMBIM6	42	27	0	1.06	22.51	0.53
AC005062	44	14	0	-5.11	-5.67	6.02
RHOQ	46	31	0	9.09	-3.24	1.9
AL662899	47	26	0	0.58	2.46	-3.57
RNF145	49	36	0	1.04	-0.7	6.63
ASXL1	51	12	0	-0.9	-1.14	-1.06
AL139082	52	14	0	-0.65	-0.67	0.6
ASPN	54	47	0	48.88	57.57	63.81
BBX	56	38	0	2.59	2.83	-0.31
CNOT8	57	26	0	0.17	3.34	-1.2
SLC7A6	58	21	0	-1.35	1.72	1.85
AC115618	59	0	0	-1.13	-2.26	-1.63
ANKRD11	61	24	0	0.15	-1.8	-0.05
LBH	64	46	0	6.37	5.68	4.49
SCARNA12	65	25	0	0.47	-1.29	1.26
CBLL1	66	10	0	-0.61	-1.5	0.5
SIX1	67	36	0	1.85	-1	4.24
MAP2K7	68	27	0	0.45	1.82	0.26
BIVM-ERCC5	70	18	0	-0.14	0.45	3.82
TUBA1A	72	18	0	-18.18	9.9	38.55
SNRPGP10	75	3	0	-8.1	-2.21	-7.04
NHSL2	78	7	0	-1.71	-0.47	0.59
TMEM189-UBE2V1	79	39	0	1.48	1.26	6.09
SCAMP1	80	15	0	-0.51	0.08	-3.1
HNRNPA1L2	81	19	0	-1.32	2.78	-2.33
SSR1	85	37	0	0.65	1.94	-5.2
PRR5L	86	14	0	-0.45	-0.6	0.43
MIR4707	87	47	0	12.72	11.79	13.66
BIRC2	88	46	0	6.22	5.61	3.02
UBFD1	89	39	0	0.05	-0.1	1.03
SEC14L1	92	39	0	0.99	0.55	3
ORAI3	94	4	0	-1.14	-0.64	-0.69
LPAR6	103	40	0	1.41	2.57	0.17
AC004922	104	32	0	3.94	-2.1	2.39
HIPK1	105	11	0	-2.15	-1.12	-4.22
ATP13A3	106	0	0	-1.94	-2.75	-2
RPL21P16	107	8	0	-60.82	-126.12	-61.52
ANP32E	108	45	0	4.07	2.88	3.58
VPS26C	110	13	0	-1.52	-1.67	-0.42
AKAP13	111	7	0	-1.95	-0.54	0.54
VAMP7	113	14	0	-2.16	-3.07	2.97
PLSCR3	115	31	0	1.96	-2.78	-0.12
AC023055	117	30	0	0.41	-0.42	-0.85
RASAL2	120	32	0	0.95	-0.48	0.68
STK4	122	0	0	-1.83	-2.46	-1.27
NPIPA2	123	47	0	1.19	0.97	1.26
MPZL1	127	19	0	-2.24	2.46	-2.14
AC006011	128	46	0	1.99	2.29	0.89
COMMD5	129	17	0	-2.34	-0.54	-0.28
ADNP	130	16	0	-3.68	-0.99	-4.23
RPE	131	26	0	0.35	1.4	-2.54
ALG2	132	16	0	-2.99	-0.62	-2.61
FAM111A	133	23	0	-0.69	-2.37	-2.17
BCL2L2	134	26	0	-0.31	7.22	-5.9
TMEM230	138	23	0	3.54	-8.86	-13.54
MINDY2	141	43	0	1.57	1.02	-0.31
C4ORF48	143	23	0	-1.08	-3.94	-3.36
