# Supplementary material for: Transcriptome analysis reveals the mechanism of stromal cell-derived factor-1 and exendin-4 synergistically promoted periodontal ligament stem cells osteogenic differentiation
Source: PeerJ. 2021 Aug 27;9:e12091. doi: 10.7717/peerj.12091 (PMC8404574; doi:10.7717/peerj.12091)
Supplement: Supplemental Information 13 — Related to Fig. 4C. [file peerj-09-12091-s013.xlsx]

## Sheet: genemania-genes
Symbol	Description	Score	Functions	Links
INO80B-WBP1		1		http://www.ensembl.org/Homo_sapiens/geneview?gene=ENSG00000274049
NPIPA2		1		http://www.ensembl.org/Homo_sapiens/geneview?gene=ENSG00000254852
NHSL2		1		http://www.ncbi.nlm.nih.gov/sites/entrez?db=gene&cmd=search&term=340527
TMEM189-UBE2V1		1		http://www.ncbi.nlm.nih.gov/sites/entrez?db=gene&cmd=search&term=387522
BIVM-ERCC5		1		http://www.ensembl.org/Homo_sapiens/geneview?gene=ENSG00000270181
UBFD1		0.83671		http://www.ncbi.nlm.nih.gov/sites/entrez?db=gene&cmd=search&term=56061
MT1A		0.82132	cellular response to inorganic substance, cellular response to metal ion, cellular response to zinc ion, response to cadmium ion, response to transition metal nanoparticle, response to zinc ion	http://www.ncbi.nlm.nih.gov/sites/entrez?db=gene&cmd=search&term=4489
NRSN2		0.698997		http://www.ncbi.nlm.nih.gov/sites/entrez?db=gene&cmd=search&term=80023
RNF145		0.642813		http://www.ncbi.nlm.nih.gov/sites/entrez?db=gene&cmd=search&term=153830
PRR5L		0.628104		http://www.ncbi.nlm.nih.gov/sites/entrez?db=gene&cmd=search&term=79899
ANP32E		0.623836		http://www.ncbi.nlm.nih.gov/sites/entrez?db=gene&cmd=search&term=81611
ASPN		0.598474		http://www.ncbi.nlm.nih.gov/sites/entrez?db=gene&cmd=search&term=54829
SIX1		0.574508		http://www.ncbi.nlm.nih.gov/sites/entrez?db=gene&cmd=search&term=6495
SEC14L1		0.557871		http://www.ncbi.nlm.nih.gov/sites/entrez?db=gene&cmd=search&term=6397
AKAP13		0.542185		http://www.ncbi.nlm.nih.gov/sites/entrez?db=gene&cmd=search&term=102465803
VAMP7		0.538466		http://www.ncbi.nlm.nih.gov/sites/entrez?db=gene&cmd=search&term=6845
TUBA1A		0.503925		http://www.ncbi.nlm.nih.gov/sites/entrez?db=gene&cmd=search&term=7846
CHD9		0.461995		http://www.ncbi.nlm.nih.gov/sites/entrez?db=gene&cmd=search&term=80205
TMEM159		0.0127879		http://www.ncbi.nlm.nih.gov/sites/entrez?db=gene&cmd=search&term=57146
CEACAM7		0.00846355		http://www.ncbi.nlm.nih.gov/sites/entrez?db=gene&cmd=search&term=1087
CEBPB		0.00740231		http://www.ncbi.nlm.nih.gov/sites/entrez?db=gene&cmd=search&term=1051
ABCG4		0.00731538		http://www.ncbi.nlm.nih.gov/sites/entrez?db=gene&cmd=search&term=64137
NPAT		0.00678345		http://www.ncbi.nlm.nih.gov/sites/entrez?db=gene&cmd=search&term=4863
UNG		0.00634966		http://www.ncbi.nlm.nih.gov/sites/entrez?db=gene&cmd=search&term=7374
TMEM256		0.00616599		http://www.ncbi.nlm.nih.gov/sites/entrez?db=gene&cmd=search&term=254863
MT1F		0.00613788	cellular response to inorganic substance, cellular response to metal ion, cellular response to zinc ion, response to cadmium ion, response to transition metal nanoparticle, response to zinc ion	http://www.ncbi.nlm.nih.gov/sites/entrez?db=gene&cmd=search&term=4494
CCDC28A		0.00568068		http://www.ncbi.nlm.nih.gov/sites/entrez?db=gene&cmd=search&term=25901
DUSP19		0.00557729		http://www.ncbi.nlm.nih.gov/sites/entrez?db=gene&cmd=search&term=142679
ANGPTL2		0.00550204		http://www.ncbi.nlm.nih.gov/sites/entrez?db=gene&cmd=search&term=23452
PRPSAP1		0.00547511		http://www.ncbi.nlm.nih.gov/sites/entrez?db=gene&cmd=search&term=5635
C9orf116		0.00547217		http://www.ncbi.nlm.nih.gov/sites/entrez?db=gene&cmd=search&term=138162
MT1H		0.00541631	cellular response to inorganic substance, cellular response to metal ion, cellular response to zinc ion, response to cadmium ion, response to transition metal nanoparticle, response to zinc ion	http://www.ncbi.nlm.nih.gov/sites/entrez?db=gene&cmd=search&term=4496
TIPRL		0.00530851		http://www.ncbi.nlm.nih.gov/sites/entrez?db=gene&cmd=search&term=261726
MAN1B1		0.00513706		http://www.ncbi.nlm.nih.gov/sites/entrez?db=gene&cmd=search&term=11253
FPGT		0.00511303		http://www.ncbi.nlm.nih.gov/sites/entrez?db=gene&cmd=search&term=8790
AHDC1		0.00495993		http://www.ncbi.nlm.nih.gov/sites/entrez?db=gene&cmd=search&term=27245
TMEM5		0.00495688		http://www.ncbi.nlm.nih.gov/sites/entrez?db=gene&cmd=search&term=10329
C5orf15		0.00495129		http://www.ncbi.nlm.nih.gov/sites/entrez?db=gene&cmd=search&term=56951
