# Supplementary material for: Transcriptome analysis reveals the mechanism of stromal cell-derived factor-1 and exendin-4 synergistically promoted periodontal ligament stem cells osteogenic differentiation
Source: PeerJ. 2021 Aug 27;9:e12091. doi: 10.7717/peerj.12091 (PMC8404574; doi:10.7717/peerj.12091)
Supplement: Supplemental Information 14 — Related to Fig. 4D. [file peerj-09-12091-s014.xlsx]

## Sheet: Sheet1
GroupID	Category	Term	Description	LogP	Log(q-value)	InTerm_InList	Genes	Symbols
1_Summary	Reactome Gene Sets	R-HSA-5661231	Metallothioneins bind metals	-6.42264	-2.24195	3/11	4489,4494,4496,1051,7846	MT1A,MT1F,MT1H,CEBPB,TUBA1A
1_Member	Reactome Gene Sets	R-HSA-5661231	Metallothioneins bind metals	-6.42264	-2.24195	3/11	4489,4494,4496	MT1A,MT1F,MT1H
1_Member	Reactome Gene Sets	R-HSA-5660526	Response to metal ions	-6.08024	-2.24195	3/14	4489,4494,4496	MT1A,MT1F,MT1H
1_Member	GO Biological Processes	GO:0010273	detoxification of copper ion	-5.98374	-2.24195	3/15	4489,4494,4496	MT1A,MT1F,MT1H
1_Member	GO Biological Processes	GO:1990169	stress response to copper ion	-5.98374	-2.24195	3/15	4489,4494,4496	MT1A,MT1F,MT1H
1_Member	GO Biological Processes	GO:0061687	detoxification of inorganic compound	-5.81005	-2.24195	3/17	4489,4494,4496	MT1A,MT1F,MT1H
1_Member	GO Biological Processes	GO:0097501	stress response to metal ion	-5.81005	-2.24195	3/17	4489,4494,4496	MT1A,MT1F,MT1H
1_Member	GO Biological Processes	GO:0071294	cellular response to zinc ion	-5.3392	-1.83805	3/24	4489,4494,4496	MT1A,MT1F,MT1H
1_Member	GO Biological Processes	GO:0071280	cellular response to copper ion	-5.1317	-1.68853	3/28	4489,4494,4496	MT1A,MT1F,MT1H
1_Member	GO Biological Processes	GO:0006882	cellular zinc ion homeostasis	-4.76029	-1.38576	3/37	4489,4494,4496	MT1A,MT1F,MT1H
1_Member	GO Biological Processes	GO:0071276	cellular response to cadmium ion	-4.72498	-1.38576	3/38	4489,4494,4496	MT1A,MT1F,MT1H
1_Member	GO Biological Processes	GO:0055069	zinc ion homeostasis	-4.69062	-1.38576	3/39	4489,4494,4496	MT1A,MT1F,MT1H
1_Member	GO Biological Processes	GO:0046688	response to copper ion	-4.5618	-1.29472	3/43	4489,4494,4496	MT1A,MT1F,MT1H
1_Member	KEGG Pathway	ko04978	Mineral absorption	-4.33782	-1.10551	3/51	4489,4494,4496	MT1A,MT1F,MT1H
1_Member	KEGG Pathway	hsa04978	Mineral absorption	-4.28752	-1.09294	3/53	4489,4494,4496	MT1A,MT1F,MT1H
1_Member	GO Biological Processes	GO:0010043	response to zinc ion	-4.2631	-1.09294	3/54	4489,4494,4496	MT1A,MT1F,MT1H
1_Member	GO Biological Processes	GO:0046686	response to cadmium ion	-4.04193	-0.899795	3/64	4489,4494,4496	MT1A,MT1F,MT1H
1_Member	GO Biological Processes	GO:0046916	cellular transition metal ion homeostasis	-3.30095	-0.185147	3/114	4489,4494,4496	MT1A,MT1F,MT1H
1_Member	GO Biological Processes	GO:0098754	detoxification	-3.10617	-0.0151845	3/133	4489,4494,4496	MT1A,MT1F,MT1H
1_Member	GO Biological Processes	GO:0055076	transition metal ion homeostasis	-3.0781	-0.0106018	3/136	4489,4494,4496	MT1A,MT1F,MT1H
1_Member	Reactome Gene Sets	R-HSA-8953897	Cellular responses to external stimuli	-2.91151	0	5/598	1051,4489,4494,4496,7846	CEBPB,MT1A,MT1F,MT1H,TUBA1A
1_Member	GO Biological Processes	GO:0071248	cellular response to metal ion	-2.64228	0	3/193	4489,4494,4496	MT1A,MT1F,MT1H
1_Member	GO Biological Processes	GO:0071241	cellular response to inorganic substance	-2.47624	0	3/221	4489,4494,4496	MT1A,MT1F,MT1H
1_Member	GO Biological Processes	GO:0045926	negative regulation of growth	-2.30748	0	3/254	4489,4494,4496	MT1A,MT1F,MT1H
2_Summary	Reactome Gene Sets	R-HSA-446203	Asparagine N-linked glycosylation	-2.09267	0	3/304	7846,8790,11253	TUBA1A,FPGT,MAN1B1
2_Member	Reactome Gene Sets	R-HSA-446203	Asparagine N-linked glycosylation	-2.09267	0	3/304	7846,8790,11253	TUBA1A,FPGT,MAN1B1
