# Supplementary material for: Transcriptome analysis reveals the mechanism of stromal cell-derived factor-1 and exendin-4 synergistically promoted periodontal ligament stem cells osteogenic differentiation
Source: PeerJ. 2021 Aug 27;9:e12091. doi: 10.7717/peerj.12091 (PMC8404574; doi:10.7717/peerj.12091)
Supplement: Supplemental Information 15 — GSEA enrichment based on all genes in SDF-1 vs NC, EX-4 vs NC, SDF-1+EX-4 vs NC, SDF-1+EX-4 vs EX-4, and SDF-1+EX-4 vs SDF-1. Related to Fig. 6. [file peerj-09-12091-s015.xlsx]

## Sheet: SDF-1 vs NC
ID	Description	setSize	enrichmentScore	NES	pvalue	p.adjust	qvalues	rank	leading_edge	core_enrichment
KEGG_METABOLISM_OF_XENOBIOTICS_BY_CYTOCHROME_P450	KEGG_METABOLISM_OF_XENOBIOTICS_BY_CYTOCHROME_P450	47	-0.605104	-1.52321	0.012833	1	1	2955	tags=19%, list=10%, signal=17%	CYP2F1/AKR1C4/UGT2B10/CYP3A43/GSTA1/CYP2S1/ADH4/DHDH
KEGG_REGULATION_OF_AUTOPHAGY	KEGG_REGULATION_OF_AUTOPHAGY	20	-0.697691	-1.49177	0.0326836	1	1	2277	tags=15%, list=7%, signal=14%	GABARAPL1/IFNA5
KEGG_NEUROACTIVE_LIGAND_RECEPTOR_INTERACTION	KEGG_NEUROACTIVE_LIGAND_RECEPTOR_INTERACTION	190	0.386358	1.19964	0.0721908	1	1	4931	tags=26%, list=16%, signal=22%	GRID2/ADRB1/GLRA3/NPY1R/PRSS3/GALR2/HTR2C/CHRM4/GRM2/AVPR1A/GABRG3/GRIA2/PTAFR/TACR1/CYSLTR2/P2RY2/GABRQ/LPAR6/P2RY14/NPFFR2/CHRNG/OPRD1/GRM8/GPR83/GPR35/FPR2/S1PR5/PTGER3/GRIN2B/S1PR1/CCKBR/GABRA4/GRID1/ADRB2/GPR156/GRIN2A/C3AR1/P2RX6/CHRM2/EDNRB/BDKRB1/HTR1B/ADRA1D/GRIN2C/CHRM3/ADORA1/GRM1/GABBR2/FPR3
KEGG_BASAL_TRANSCRIPTION_FACTORS	KEGG_BASAL_TRANSCRIPTION_FACTORS	34	0.541738	1.29994	0.109505	1	1	134	tags=3%, list=0%, signal=3%	TAF1L
KEGG_RIBOSOME	KEGG_RIBOSOME	88	-0.435185	-1.21062	0.1201	1	1	10491	tags=67%, list=34%, signal=44%	RPL38/RPSA/FAU/RPL23A/RPL41/RPL8/RPL18/RPLP0/RPS23/RPL35A/RPS7/RPLP2/RPL37/RPS18/RPL13A/RPS5/RPL13/RPS27/RPL6/RPL30/RPL7/RPS13/RPL7A/RPL27/RPL10/RPS20/RPS16/RPS15/RPL15/RPL12/RPL34/RPL37A/RPL35/RPL26L1/RPL36A/RPS15A/RSL24D1/RPS11/RPL17/RPS3A/RPL28/RPLP1/RPS12/RPL9/RPL36/RPL32/RPS9/UBA52/RPS27A/RPL18A/RPS3/RPL4/RPS21/RPS28/RPS29/RPL31/RPL39/RPS2
KEGG_AUTOIMMUNE_THYROID_DISEASE	KEGG_AUTOIMMUNE_THYROID_DISEASE	23	-0.553941	-1.21597	0.191913	1	1	5391	tags=35%, list=18%, signal=29%	HLA-DPB1/HLA-DRA/TG/TSHR/CD28/CTLA4/IFNA5
KEGG_ALANINE_ASPARTATE_AND_GLUTAMATE_METABOLISM	KEGG_ALANINE_ASPARTATE_AND_GLUTAMATE_METABOLISM	27	-0.53157	-1.20677	0.197239	1	1	4595	tags=41%, list=15%, signal=35%	ASS1/ADSL/IL4I1/GOT1/GFPT1/ASNS/ASPA/ALDH5A1/DDO/GAD2
KEGG_PENTOSE_AND_GLUCURONATE_INTERCONVERSIONS	KEGG_PENTOSE_AND_GLUCURONATE_INTERCONVERSIONS	15	-0.6099	-1.22948	0.2035	1	1	3825	tags=27%, list=13%, signal=23%	UGT2B17/UGT2B10/DHDH
KEGG_RENIN_ANGIOTENSIN_SYSTEM	KEGG_RENIN_ANGIOTENSIN_SYSTEM	13	0.628361	1.23281	0.213884	1	1	1139	tags=8%, list=4%, signal=7%	CMA1
KEGG_GLYCOSPHINGOLIPID_BIOSYNTHESIS_LACTO_AND_NEOLACTO_SERIES	KEGG_GLYCOSPHINGOLIPID_BIOSYNTHESIS_LACTO_AND_NEOLACTO_SERIES	18	-0.576947	-1.20857	0.216594	1	1	6090	tags=28%, list=20%, signal=22%	B3GNT4/ST8SIA1/B3GALT2/FUT2
KEGG_P53_SIGNALING_PATHWAY	KEGG_P53_SIGNALING_PATHWAY	66	-0.427397	-1.13868	0.220228	1	1	9617	tags=45%, list=31%, signal=31%	CDKN2A/CCNB2/RRM2/SERPINE1/GTSE1/BAX/GADD45A/CDK4/CCND3/SIAH1/SESN2/CCND2/DDB2/BBC3/CCNB1/RCHY1/CDK1/TP53/FAS/CDKN1A/GADD45B/CCNG2/CCNB3/CHEK1/SFN/IGF1/TP53AIP1/GADD45G/ADGRB1
KEGG_GLYCOSAMINOGLYCAN_BIOSYNTHESIS_CHONDROITIN_SULFATE	KEGG_GLYCOSAMINOGLYCAN_BIOSYNTHESIS_CHONDROITIN_SULFATE	21	-0.551468	-1.19061	0.221154	1	1	557	tags=43%, list=2%, signal=42%	CHSY3/B3GAT3/CHPF/CHST11/CHST14/B3GAT2/CHST15/CHST13
KEGG_HEDGEHOG_SIGNALING_PATHWAY	KEGG_HEDGEHOG_SIGNALING_PATHWAY	46	0.447687	1.1351	0.243304	1	1	2616	tags=13%, list=9%, signal=12%	WNT11/BMP7/WNT8B/ZIC2/WNT2/WNT10B
KEGG_AXON_GUIDANCE	KEGG_AXON_GUIDANCE	124	-0.372133	-1.08199	0.270532	1	1	6644	tags=17%, list=22%, signal=13%	LRRC4C/EPHB1/EPHA1/NFATC3/EPHB2/DCC/SEMA4C/NGEF/ROBO2/EFNA1/SLIT1/DPYSL2/SEMA3G/UNC5C/PAK6/UNC5A/EFNB3/NTN3/RND1/L1CAM
KEGG_GLYCOSPHINGOLIPID_BIOSYNTHESIS_GLOBO_SERIES	KEGG_GLYCOSPHINGOLIPID_BIOSYNTHESIS_GLOBO_SERIES	11	-0.625608	-1.17314	0.276877	1	1	5443	tags=27%, list=18%, signal=22%	ST8SIA1/FUT2
KEGG_ACUTE_MYELOID_LEUKEMIA	KEGG_ACUTE_MYELOID_LEUKEMIA	55	0.420552	1.09801	0.279664	1	1	9463	tags=36%, list=31%, signal=25%	CCNA1/PIK3CG/CEBPA/PIK3R1/PIK3R2/ZBTB16/STAT5A/SPI1/PIK3CD/LEF1/TCF7/SOS1/MYC/JUP/IKBKB/PIK3R3/STAT3/STAT5B/RPS6KB1/GRB2
KEGG_FRUCTOSE_AND_MANNOSE_METABOLISM	KEGG_FRUCTOSE_AND_MANNOSE_METABOLISM	30	-0.48269	-1.1162	0.286927	1	1	2435	tags=17%, list=8%, signal=15%	SORD/KHK/ALDOB/PFKFB1
KEGG_HEMATOPOIETIC_CELL_LINEAGE	KEGG_HEMATOPOIETIC_CELL_LINEAGE	50	-0.42559	-1.0808	0.308251	1	1	5744	tags=24%, list=19%, signal=20%	IL7/HLA-DRA/CD7/FCGR1A/FLT3LG/GP1BB/CD38/CSF2RA/CD8A/CD19/GP5
KEGG_NICOTINATE_AND_NICOTINAMIDE_METABOLISM	KEGG_NICOTINATE_AND_NICOTINAMIDE_METABOLISM	23	-0.492678	-1.08149	0.346746	1	1	4269	tags=17%, list=14%, signal=15%	CD38/NT5C1B/NT5M
KEGG_DORSO_VENTRAL_AXIS_FORMATION	KEGG_DORSO_VENTRAL_AXIS_FORMATION	22	0.48833	1.06901	0.36	1	1	8024	tags=32%, list=26%, signal=23%	NOTCH4/ETS2/ETV7/NOTCH1/SOS1/EGFR/SPIRE2
KEGG_MATURITY_ONSET_DIABETES_OF_THE_YOUNG	KEGG_MATURITY_ONSET_DIABETES_OF_THE_YOUNG	10	-0.603259	-1.10531	0.360537	1	1	4013	tags=50%, list=13%, signal=43%	HNF4G/NR5A2/ONECUT1/BHLHA15
KEGG_DRUG_METABOLISM_OTHER_ENZYMES	KEGG_DRUG_METABOLISM_OTHER_ENZYMES	34	0.44039	1.05675	0.363118	1	1	4469	tags=21%, list=15%, signal=18%	CYP2A7/CYP2A6/UGT2B15/NAT2/UPB1/CYP3A7/UGT2B7
KEGG_LEISHMANIA_INFECTION	KEGG_LEISHMANIA_INFECTION	52	-0.406977	-1.0427	0.368339	1	1	5866	tags=21%, list=19%, signal=17%	MAPK14/HLA-DPB1/HLA-DRA/FCGR1A/NFKBIB/PTPN6/TLR2/IL12B/NOS2/FCGR2C
KEGG_VASCULAR_SMOOTH_MUSCLE_CONTRACTION	KEGG_VASCULAR_SMOOTH_MUSCLE_CONTRACTION	98	-0.36624	-1.03144	0.372549	1	1	7169	tags=26%, list=23%, signal=20%	RAMP1/ADCY2/MAP2K2/ADRA1B/ADORA2A/PTGIR/BRAF/KCNMB1/EDNRA/KCNMB3/KCNMB2/PPP1CC/PPP1R12B/PPP1R14A/PLCB2/CALM1/GUCY1A2/MRVI1/PLA2G4B/MYLK2/CACNA1D/ADCY8/ADRA1A/PRKCG
KEGG_GLYCOSPHINGOLIPID_BIOSYNTHESIS_GANGLIO_SERIES	KEGG_GLYCOSPHINGOLIPID_BIOSYNTHESIS_GANGLIO_SERIES	14	-0.537981	-1.06653	0.37737	1	1	5474	tags=21%, list=18%, signal=18%	ST8SIA1/ST6GALNAC3
KEGG_COMPLEMENT_AND_COAGULATION_CASCADES	KEGG_COMPLEMENT_AND_COAGULATION_CASCADES	52	0.398771	1.03217	0.38676	1	1	4288	tags=21%, list=14%, signal=18%	F5/C9/PROC/C8A/C8G/SERPINC1/SERPINA5/MBL2/C3AR1/BDKRB1/PROS1
KEGG_TYPE_II_DIABETES_MELLITUS	KEGG_TYPE_II_DIABETES_MELLITUS	38	0.421958	1.03037	0.398529	1	1	8940	tags=50%, list=29%, signal=35%	PIK3CG/KCNJ11/MAFA/PKM/PRKCZ/GCK/PIK3R1/PIK3R2/PIK3CD/SOCS1/HK1/CACNA1A/IKBKB/CACNA1G/IRS1/SOCS3/HK2/PIK3R3/MAPK8
KEGG_CYTOSOLIC_DNA_SENSING_PATHWAY	KEGG_CYTOSOLIC_DNA_SENSING_PATHWAY	39	-0.4242	-1.02966	0.402857	1	1	2613	tags=18%, list=9%, signal=16%	CASP1/NFKBIB/CCL5/IL33/IL18/IFNA5
KEGG_ARACHIDONIC_ACID_METABOLISM	KEGG_ARACHIDONIC_ACID_METABOLISM	41	0.412886	1.02287	0.409221	1	1	2584	tags=7%, list=8%, signal=7%	GPX2/PLA2G2A/GGT1
KEGG_PRION_DISEASES	KEGG_PRION_DISEASES	28	0.439609	1.01164	0.425722	1	1	3949	tags=18%, list=13%, signal=16%	C9/C8A/C8G/PRNP/IL6
KEGG_GLYCOSAMINOGLYCAN_DEGRADATION	KEGG_GLYCOSAMINOGLYCAN_DEGRADATION	19	-0.482277	-1.02169	0.431666	1	1	7536	tags=37%, list=25%, signal=28%	NAGLU/IDS/HPSE/SGSH/HYAL2/HYAL1
KEGG_TIGHT_JUNCTION	KEGG_TIGHT_JUNCTION	115	-0.349173	-1.00421	0.432542	1	1	3499	tags=10%, list=11%, signal=9%	F11R/CTNNA3/PARD6A/CLDN18/CRB3/ACTN3/CLDN3/CTNNA2/PRKCG/LLGL2/CLDN16
KEGG_TYPE_I_DIABETES_MELLITUS	KEGG_TYPE_I_DIABETES_MELLITUS	26	-0.442173	-0.997916	0.452663	1	1	2594	tags=23%, list=8%, signal=21%	HLA-DPB1/HLA-DRA/IL12B/CD28/GAD2
KEGG_CALCIUM_SIGNALING_PATHWAY	KEGG_CALCIUM_SIGNALING_PATHWAY	157	-0.327982	-0.979116	0.49035	1	1	3475	tags=13%, list=11%, signal=12%	ATP2B4/SLC8A3/CD38/CYSLTR1/GRPR/MYLK2/HTR2A/PLN/CACNA1D/CAMK2A/ADCY8/SLC8A2/NOS2/P2RX1/RYR1/ATP2B3/ADRA1A/PRKCG/CACNA1H/DRD1
KEGG_BETA_ALANINE_METABOLISM	KEGG_BETA_ALANINE_METABOLISM	21	-0.453874	-0.979907	0.49117	1	1	428	tags=14%, list=1%, signal=14%	AOC2/GAD2
KEGG_CELL_ADHESION_MOLECULES_CAMS	KEGG_CELL_ADHESION_MOLECULES_CAMS	105	-0.339462	-0.966817	0.521397	1	1	3205	tags=10%, list=10%, signal=9%	ESAM/MPZL1/NRXN3/CLDN3/CD8A/CD28/CTLA4/CNTN2/L1CAM/CLDN16
KEGG_PROPANOATE_METABOLISM	KEGG_PROPANOATE_METABOLISM	33	0.399049	0.951572	0.52409	1	1	3356	tags=9%, list=11%, signal=8%	LDHAL6B/LDHAL6A/SUCLG2P2
KEGG_STEROID_HORMONE_BIOSYNTHESIS	KEGG_STEROID_HORMONE_BIOSYNTHESIS	32	-0.406353	-0.951263	0.534214	1	1	2955	tags=16%, list=10%, signal=14%	AKR1C4/UGT2B10/CYP3A43/CYP17A1
KEGG_ARGININE_AND_PROLINE_METABOLISM	KEGG_ARGININE_AND_PROLINE_METABOLISM	49	-0.375398	-0.948839	0.550796	1	1	2669	tags=8%, list=9%, signal=7%	PRODH/NOS2/GATM
KEGG_APOPTOSIS	KEGG_APOPTOSIS	79	0.343753	0.948917	0.563057	1	1	8869	tags=29%, list=29%, signal=21%	PIK3CG/BIRC2/XIAP/CFLAR/TNFRSF10C/CASP10/IL1R1/PIK3R1/PIK3R2/IL3RA/APAF1/PIK3CD/DFFB/BID/TNFRSF1A/EXOG/TNFRSF10D/AIFM1/IKBKB/IL1RAP/PRKAR1A/RIPK1/PIK3R3
KEGG_CYTOKINE_CYTOKINE_RECEPTOR_INTERACTION	KEGG_CYTOKINE_CYTOKINE_RECEPTOR_INTERACTION	185	-0.314062	-0.954779	0.579916	1	1	3994	tags=14%, list=13%, signal=12%	CCL13/TNFRSF11A/IL18RAP/LTB/TNFRSF13C/TNFSF12/FLT1/TNFSF13/TNFRSF18/IL24/CCL5/IL12B/CCL22/CSF2RA/IL17B/IL26/XCR1/IL18/OSM/TNFRSF6B/TNFRSF8/IL2RG/IFNA5/CCR9
KEGG_CARDIAC_MUSCLE_CONTRACTION	KEGG_CARDIAC_MUSCLE_CONTRACTION	62	0.351239	0.934106	0.584482	1	1	1041	tags=5%, list=3%, signal=5%	TNNT2/COX8C/CACNG4
KEGG_TASTE_TRANSDUCTION	KEGG_TASTE_TRANSDUCTION	33	0.384917	0.917871	0.585485	1	1	3325	tags=18%, list=11%, signal=16%	TAS2R50/TAS2R46/TAS2R10/TAS2R4/TAS2R31/GNG3
KEGG_O_GLYCAN_BIOSYNTHESIS	KEGG_O_GLYCAN_BIOSYNTHESIS	27	-0.404058	-0.917289	0.586588	1	1	6314	tags=22%, list=21%, signal=18%	GCNT4/GALNT14/GALNTL6/GALNT9/GALNT17
KEGG_PRIMARY_BILE_ACID_BIOSYNTHESIS	KEGG_PRIMARY_BILE_ACID_BIOSYNTHESIS	15	-0.450727	-0.908607	0.595163	1	1	9366	tags=47%, list=31%, signal=32%	CYP46A1/ACOX2/CYP39A1/CYP7B1/CYP8B1/AKR1C4
KEGG_MISMATCH_REPAIR	KEGG_MISMATCH_REPAIR	23	-0.414182	-0.90918	0.597436	1	1	10179	tags=48%, list=33%, signal=32%	MLH1/MSH3/POLD2/PCNA/RPA2/RPA3/POLD1/POLD4/RFC2/RPA4
KEGG_NOTCH_SIGNALING_PATHWAY	KEGG_NOTCH_SIGNALING_PATHWAY	43	0.367346	0.918203	0.599016	1	1	8304	tags=23%, list=27%, signal=17%	DLL3/NOTCH4/DLL1/LFNG/MAML3/NOTCH1/EP300/CIR1/CREBBP/PSEN2
KEGG_BUTANOATE_METABOLISM	KEGG_BUTANOATE_METABOLISM	31	-0.389105	-0.906408	0.611714	1	1	2076	tags=10%, list=7%, signal=9%	ACSM1/GAD2
KEGG_TRYPTOPHAN_METABOLISM	KEGG_TRYPTOPHAN_METABOLISM	34	0.375979	0.902188	0.61551	1	1	2976	tags=9%, list=10%, signal=8%	IDO2/TDO2/MAOB
KEGG_OLFACTORY_TRANSDUCTION	KEGG_OLFACTORY_TRANSDUCTION	80	0.33555	0.927783	0.615528	1	1	4862	tags=21%, list=16%, signal=18%	OR1J1/OR4F3/OR2AE1/OR4F16/CAMK2B/OR1J2/OR1F1/OR10A2/OR10A3/OR1J4/OR6A2/CNGB1/OR51B5/OR2C3/OR7D2/PDC/GUCA1B
KEGG_INTESTINAL_IMMUNE_NETWORK_FOR_IGA_PRODUCTION	KEGG_INTESTINAL_IMMUNE_NETWORK_FOR_IGA_PRODUCTION	30	-0.383406	-0.886611	0.645142	1	1	3012	tags=20%, list=10%, signal=18%	HLA-DRA/TNFRSF13C/TNFSF13/CD28/CCR9
KEGG_NON_SMALL_CELL_LUNG_CANCER	KEGG_NON_SMALL_CELL_LUNG_CANCER	51	-0.35193	-0.898525	0.648184	1	1	2428	tags=8%, list=8%, signal=7%	STK4/TGFA/PRKCG
KEGG_BASAL_CELL_CARCINOMA	KEGG_BASAL_CELL_CARCINOMA	48	0.349287	0.892191	0.658432	1	1	2616	tags=8%, list=9%, signal=8%	WNT11/WNT8B/WNT2/WNT10B
KEGG_GLYCOLYSIS_GLUCONEOGENESIS	KEGG_GLYCOLYSIS_GLUCONEOGENESIS	51	-0.349745	-0.892946	0.658922	1	1	1536	tags=6%, list=5%, signal=6%	LDHC/ADH4
KEGG_TYROSINE_METABOLISM	KEGG_TYROSINE_METABOLISM	36	-0.367921	-0.880785	0.664121	1	1	7145	tags=31%, list=23%, signal=23%	FAH/GOT1/DCT/ADH1B/NAA80/AOC2/TAT/TYRP1/HGD/ADH4
KEGG_NOD_LIKE_RECEPTOR_SIGNALING_PATHWAY	KEGG_NOD_LIKE_RECEPTOR_SIGNALING_PATHWAY	57	0.340551	0.892359	0.66749	1	1	5018	tags=18%, list=16%, signal=15%	PSTPIP1/MEFV/BIRC2/XIAP/CCL7/CXCL1/NLRP3/IL6/CCL8/CXCL8
KEGG_SNARE_INTERACTIONS_IN_VESICULAR_TRANSPORT	KEGG_SNARE_INTERACTIONS_IN_VESICULAR_TRANSPORT	38	-0.360939	-0.871817	0.683695	1	1	8578	tags=29%, list=28%, signal=21%	STX10/STX3/BET1/STX1B/VAMP5/STX6/VAMP7/VAMP8/STX17/STX19
KEGG_PPAR_SIGNALING_PATHWAY	KEGG_PPAR_SIGNALING_PATHWAY	53	0.338652	0.879577	0.692622	1	1	7116	tags=23%, list=23%, signal=17%	ACADL/AQP7/FABP4/CPT1B/FADS2/GK/PLIN1/PPARG/FABP5/ACSL1/ACOX1/SCD5
KEGG_STEROID_BIOSYNTHESIS	KEGG_STEROID_BIOSYNTHESIS	17	-0.407325	-0.84338	0.692871	1	1	5430	tags=24%, list=18%, signal=19%	SC5D/CYP27B1/SOAT2
KEGG_RETINOL_METABOLISM	KEGG_RETINOL_METABOLISM	36	-0.361114	-0.864491	0.693302	1	1	1851	tags=17%, list=6%, signal=16%	UGT2B10/CYP3A43/RDH8/RPE65/ADH4
KEGG_HISTIDINE_METABOLISM	KEGG_HISTIDINE_METABOLISM	23	0.383391	0.849467	0.694647	1	1	6999	tags=30%, list=23%, signal=23%	MAOB/HAL/ALDH3A2/METTL2B/AMDHD1/HNMT/ALDH3B1
KEGG_PENTOSE_PHOSPHATE_PATHWAY	KEGG_PENTOSE_PHOSPHATE_PATHWAY	21	-0.389589	-0.841117	0.708987	1	1	1536	tags=29%, list=5%, signal=27%	RPIA/ALDOC/ALDOA/H6PD/ALDOB
KEGG_B_CELL_RECEPTOR_SIGNALING_PATHWAY	KEGG_B_CELL_RECEPTOR_SIGNALING_PATHWAY	65	0.328582	0.879572	0.709343	1	1	5900	tags=14%, list=19%, signal=11%	BLNK/PIK3CG/RAC2/VAV2/NFAT5/PIK3R1/PIK3R2/PIK3CD/PLCG2
KEGG_FC_GAMMA_R_MEDIATED_PHAGOCYTOSIS	KEGG_FC_GAMMA_R_MEDIATED_PHAGOCYTOSIS	87	-0.321613	-0.892985	0.709946	1	1	2807	tags=6%, list=9%, signal=5%	PLA2G4B/PIP5K1B/FCGR2C/PRKCG
KEGG_INSULIN_SIGNALING_PATHWAY	KEGG_INSULIN_SIGNALING_PATHWAY	120	0.306569	0.899518	0.720385	1	1	10336	tags=34%, list=34%, signal=23%	RHOQ/PIK3CG/PRKAG3/EXOC7/PPARGC1A/PRKCZ/GCK/PIK3R1/PIK3R2/RAPGEF1/PIK3CD/SOCS1/HK1/SHC3/ACACB/SOS1/PHKG1/PTPRF/PDE3A/SORBS1/IKBKB/PPP1R3D/IRS1/PRKAR1A/TSC2/SOCS3/HK2/PIK3R3/MAPK8/PPP1R3B/RPS6KB1/GRB2/EIF4E2/PDE3B/ACACA/PRKAB1/PRKAA1/PRKAR1B/LIPE/SHC1/NRAS
KEGG_AMYOTROPHIC_LATERAL_SCLEROSIS_ALS	KEGG_AMYOTROPHIC_LATERAL_SCLEROSIS_ALS	47	0.338759	0.861458	0.726487	1	1	7468	tags=28%, list=24%, signal=21%	GRIA2/GRIN2B/NEFL/GRIN2A/TOMM40L/GRIN2C/APAF1/GRIA1/NEFH/BID/TNFRSF1A/NEFM/DAXX
KEGG_ABC_TRANSPORTERS	KEGG_ABC_TRANSPORTERS	43	0.338774	0.846784	0.750308	1	1	8784	tags=40%, list=29%, signal=28%	ABCG8/ABCG1/ABCB5/ABCC12/ABCD2/ABCC6/ABCC11/ABCA5/ABCA4/ABCC10/ABCA6/ABCC9/ABCC3/ABCD4/ABCA10/ABCB1/ABCC1
KEGG_N_GLYCAN_BIOSYNTHESIS	KEGG_N_GLYCAN_BIOSYNTHESIS	46	-0.337145	-0.844212	0.755429	1	1	4087	tags=11%, list=13%, signal=9%	MGAT4A/ALG10/MGAT5B/ALG11
KEGG_SULFUR_METABOLISM	KEGG_SULFUR_METABOLISM	11	-0.414184	-0.77668	0.773774	1	1	557	tags=18%, list=2%, signal=18%	CHST13
KEGG_PROXIMAL_TUBULE_BICARBONATE_RECLAMATION	KEGG_PROXIMAL_TUBULE_BICARBONATE_RECLAMATION	18	-0.373313	-0.782006	0.782026	1	1	3083	tags=50%, list=10%, signal=45%	MDH1/AQP1/GLS/ATP1A3/ATP1B1/ATP1A2/SLC38A3/SLC9A3
KEGG_ALDOSTERONE_REGULATED_SODIUM_REABSORPTION	KEGG_ALDOSTERONE_REGULATED_SODIUM_REABSORPTION	33	-0.344314	-0.810862	0.78615	1	1	4268	tags=12%, list=14%, signal=10%	IGF1/ATP1A2/PRKCG
KEGG_ETHER_LIPID_METABOLISM	KEGG_ETHER_LIPID_METABOLISM	25	0.350369	0.79053	0.797846	1	1	2723	tags=8%, list=9%, signal=7%	PLA2G2A/ENPP6
KEGG_NON_HOMOLOGOUS_END_JOINING	KEGG_NON_HOMOLOGOUS_END_JOINING	12	0.394895	0.757213	0.799114	1	1	11533	tags=58%, list=38%, signal=36%	RAD50/LIG4/FEN1/PRKDC/XRCC5/MRE11/NHEJ1
KEGG_GLYOXYLATE_AND_DICARBOXYLATE_METABOLISM	KEGG_GLYOXYLATE_AND_DICARBOXYLATE_METABOLISM	15	0.377758	0.763569	0.802889	1	1	4244	tags=13%, list=14%, signal=11%	HAO1/GLYCTK
KEGG_PRIMARY_IMMUNODEFICIENCY	KEGG_PRIMARY_IMMUNODEFICIENCY	26	-0.350618	-0.79129	0.802959	1	1	3012	tags=19%, list=10%, signal=17%	CD79A/CD8A/CD19/IL2RG
KEGG_ARRHYTHMOGENIC_RIGHT_VENTRICULAR_CARDIOMYOPATHY_ARVC	KEGG_ARRHYTHMOGENIC_RIGHT_VENTRICULAR_CARDIOMYOPATHY_ARVC	68	-0.308392	-0.82609	0.824005	1	1	5744	tags=18%, list=19%, signal=14%	ITGA2B/RYR2/CACNB2/DES/CTNNA3/ITGB4/ITGB6/ACTN3/SGCA/CACNA1D/CTNNA2
KEGG_SELENOAMINO_ACID_METABOLISM	KEGG_SELENOAMINO_ACID_METABOLISM	23	0.346373	0.767447	0.826845	1	1	8652	tags=17%, list=28%, signal=12%	GGT1/METTL2B/SCLY/MARS2
KEGG_PYRUVATE_METABOLISM	KEGG_PYRUVATE_METABOLISM	37	0.326925	0.794497	0.82697	1	1	2239	tags=5%, list=7%, signal=5%	LDHAL6B/LDHAL6A
KEGG_ASCORBATE_AND_ALDARATE_METABOLISM	KEGG_ASCORBATE_AND_ALDARATE_METABOLISM	12	-0.381654	-0.730371	0.833929	1	1	4829	tags=25%, list=16%, signal=21%	UGT2B17/UGT2B10
KEGG_CYSTEINE_AND_METHIONINE_METABOLISM	KEGG_CYSTEINE_AND_METHIONINE_METABOLISM	32	0.329439	0.780352	0.838572	1	1	3624	tags=9%, list=12%, signal=8%	LDHAL6B/LDHAL6A/MTAP
KEGG_THYROID_CANCER	KEGG_THYROID_CANCER	28	0.334927	0.77074	0.84534	1	1	7584	tags=21%, list=25%, signal=16%	CDH1/RET/LEF1/PPARG/TCF7/MYC
KEGG_NITROGEN_METABOLISM	KEGG_NITROGEN_METABOLISM	19	-0.350214	-0.741917	0.848365	1	1	1409	tags=21%, list=5%, signal=20%	ASNS/CA7/CA8
KEGG_GLIOMA	KEGG_GLIOMA	60	-0.307738	-0.805777	0.854974	1	1	1532	tags=17%, list=5%, signal=16%	TP53/MAP2K2/BRAF/CDKN1A/CALM1/IGF1/TGFA/CAMK2A/PRKCG
KEGG_CIRCADIAN_RHYTHM_MAMMAL	KEGG_CIRCADIAN_RHYTHM_MAMMAL	12	0.372357	0.713997	0.858092	1	1	8374	tags=33%, list=27%, signal=24%	CLOCK/PER2/BHLHE40/CSNK1D
KEGG_PROTEIN_EXPORT	KEGG_PROTEIN_EXPORT	24	0.334511	0.748405	0.860102	1	1	12059	tags=62%, list=39%, signal=38%	SRP68/IMMP2L/SEC61A1/SRP9P1/SEC61A2/HSPA5/SRP19/SEC11C/SPCS2/SEC61G/SEC63/SRP54/SEC61B/OXA1L/SRPRA
KEGG_GLUTATHIONE_METABOLISM	KEGG_GLUTATHIONE_METABOLISM	44	0.312404	0.784215	0.860814	1	1	2584	tags=4%, list=8%, signal=4%	GPX2/GGT1
KEGG_T_CELL_RECEPTOR_SIGNALING_PATHWAY	KEGG_T_CELL_RECEPTOR_SIGNALING_PATHWAY	88	-0.296303	-0.824272	0.862908	1	1	6600	tags=15%, list=22%, signal=12%	NFKBIE/NFATC3/IKBKG/MAPK14/RASGRP1/NFKBIB/PTPN6/PAK6/CD8A/CD28/CTLA4/LCP2
KEGG_ASTHMA	KEGG_ASTHMA	16	0.352382	0.721529	0.867167	1	1	3902	tags=25%, list=13%, signal=22%	HLA-DMB/IL13/HLA-DQB1/PRG2
KEGG_GLYCINE_SERINE_AND_THREONINE_METABOLISM	KEGG_GLYCINE_SERINE_AND_THREONINE_METABOLISM	27	-0.325799	-0.739626	0.883826	1	1	371	tags=30%, list=1%, signal=29%	SHMT2/PHGDH/CTH/PSAT1/GLDC/AOC2/GATM
KEGG_FATTY_ACID_METABOLISM	KEGG_FATTY_ACID_METABOLISM	38	-0.313607	-0.75749	0.887845	1	1	160	tags=21%, list=1%, signal=21%	ADH6/ACSL5/ACADS/EHHADH/ECI1/ADH1B/ADH4
KEGG_PHOSPHATIDYLINOSITOL_SIGNALING_SYSTEM	KEGG_PHOSPHATIDYLINOSITOL_SIGNALING_SYSTEM	70	-0.296985	-0.798152	0.887986	1	1	1368	tags=10%, list=4%, signal=10%	PLCB2/CALM1/ITPKA/DGKB/PIP5K1B/PRKCG
KEGG_LEUKOCYTE_TRANSENDOTHELIAL_MIGRATION	KEGG_LEUKOCYTE_TRANSENDOTHELIAL_MIGRATION	99	-0.288508	-0.813649	0.894716	1	1	4256	tags=11%, list=14%, signal=10%	CTNNA3/RASSF5/CLDN18/ESAM/RAPGEF4/ACTN3/CLDN3/CTNNA2/PRKCG/CLDN16
KEGG_RIG_I_LIKE_RECEPTOR_SIGNALING_PATHWAY	KEGG_RIG_I_LIKE_RECEPTOR_SIGNALING_PATHWAY	56	-0.298793	-0.775155	0.897736	1	1	7733	tags=23%, list=25%, signal=17%	TANK/NFKBIA/DDX58/ISG15/MAPK10/IKBKG/MAPK14/RNF125/TRAF3/NFKBIB/IL12B/IFNA5
KEGG_ECM_RECEPTOR_INTERACTION	KEGG_ECM_RECEPTOR_INTERACTION	78	-0.290748	-0.794537	0.902298	1	1	6946	tags=18%, list=23%, signal=14%	COL4A4/CHAD/ITGB7/ITGA2B/VWF/TNXB/RELN/GP1BB/ITGB4/COL6A6/ITGB6/THBS4/GP5
KEGG_GRAFT_VERSUS_HOST_DISEASE	KEGG_GRAFT_VERSUS_HOST_DISEASE	19	0.326667	0.69408	0.905971	1	1	5450	tags=21%, list=18%, signal=17%	HLA-DMB/HLA-DQB1/IL6/KLRD1
KEGG_DRUG_METABOLISM_CYTOCHROME_P450	KEGG_DRUG_METABOLISM_CYTOCHROME_P450	48	-0.300435	-0.757583	0.907328	1	1	1851	tags=21%, list=6%, signal=20%	CYP2C8/FMO2/ADH1B/GSTA2/UGT2B17/UGT2B10/CYP3A43/GSTA1/ADH4
KEGG_PARKINSONS_DISEASE	KEGG_PARKINSONS_DISEASE	119	0.281243	0.824777	0.907843	1	1	2875	tags=3%, list=9%, signal=3%	COX8C/SLC18A2/COX6B2/SLC25A31
KEGG_RIBOFLAVIN_METABOLISM	KEGG_RIBOFLAVIN_METABOLISM	15	0.332335	0.671755	0.909276	1	1	8310	tags=33%, list=27%, signal=24%	ACP4/MTMR7/ACPP/ACP2/MTMR2
KEGG_ANTIGEN_PROCESSING_AND_PRESENTATION	KEGG_ANTIGEN_PROCESSING_AND_PRESENTATION	56	-0.293617	-0.761726	0.915886	1	1	1941	tags=16%, list=6%, signal=15%	CIITA/HLA-DPB1/HLA-DRA/KLRC3/PSME3/CREB1/CD8A/IFNA5
KEGG_DILATED_CARDIOMYOPATHY	KEGG_DILATED_CARDIOMYOPATHY	77	0.283453	0.780279	0.929145	1	1	1041	tags=4%, list=3%, signal=4%	ADRB1/TNNT2/CACNG4
KEGG_VASOPRESSIN_REGULATED_WATER_REABSORPTION	KEGG_VASOPRESSIN_REGULATED_WATER_REABSORPTION	39	-0.298059	-0.723478	0.929759	1	1	4582	tags=18%, list=15%, signal=15%	CREB3L1/AQP3/RAB5C/RAB5A/CREB1/RAB5B
KEGG_DNA_REPLICATION	KEGG_DNA_REPLICATION	36	-0.297479	-0.712152	0.930082	1	1	858	tags=22%, list=3%, signal=22%	RPA3/DNA2/POLE4/POLD1/POLD4/RFC2/RPA4
KEGG_BLADDER_CANCER	KEGG_BLADDER_CANCER	41	0.293274	0.726544	0.931557	1	1	5457	tags=12%, list=18%, signal=10%	FGFR3/CDH1/CXCL8/RPS6KA5/EGF
KEGG_ALLOGRAFT_REJECTION	KEGG_ALLOGRAFT_REJECTION	20	-0.309367	-0.661474	0.937586	1	1	6315	tags=25%, list=21%, signal=20%	HLA-DPB1/HLA-DRA/IL12B/CD28
KEGG_MELANOMA	KEGG_MELANOMA	64	0.284414	0.760708	0.938129	1	1	5688	tags=16%, list=19%, signal=13%	FGF22/PIK3CG/FGF11/CDH1/FGF17/PIK3R1/PIK3R2/EGF/FGF20/PIK3CD
KEGG_OTHER_GLYCAN_DEGRADATION	KEGG_OTHER_GLYCAN_DEGRADATION	14	0.316009	0.628579	0.939854	1	1	11530	tags=43%, list=38%, signal=27%	ENGASE/MAN2C1/FUCA1/MAN2B1/MAN2B2/FUCA2
KEGG_ONE_CARBON_POOL_BY_FOLATE	KEGG_ONE_CARBON_POOL_BY_FOLATE	17	-0.310585	-0.643076	0.942574	1	1	8795	tags=35%, list=29%, signal=25%	AMT/SHMT2/MTHFD2/MTR/FTCD
KEGG_ALPHA_LINOLENIC_ACID_METABOLISM	KEGG_ALPHA_LINOLENIC_ACID_METABOLISM	12	0.319422	0.612494	0.942834	1	1	6899	tags=25%, list=23%, signal=19%	PLA2G2A/FADS2/ACOX1
KEGG_VIBRIO_CHOLERAE_INFECTION	KEGG_VIBRIO_CHOLERAE_INFECTION	49	-0.285822	-0.72243	0.94832	1	1	3501	tags=6%, list=11%, signal=5%	ATP6V1C2/PRKCG
KEGG_SYSTEMIC_LUPUS_ERYTHEMATOSUS	KEGG_SYSTEMIC_LUPUS_ERYTHEMATOSUS	38	0.285502	0.697161	0.95606	1	1	4582	tags=21%, list=15%, signal=18%	C9/HLA-DMB/C8A/C8G/GRIN2B/HLA-DQB1/GRIN2A/ACTN2
KEGG_JAK_STAT_SIGNALING_PATHWAY	KEGG_JAK_STAT_SIGNALING_PATHWAY	113	-0.271017	-0.778533	0.961131	1	1	2646	tags=10%, list=9%, signal=9%	IL12RB2/IL20RB/PTPN6/IL24/IL12B/CSF2RA/IL26/OSM/IL2RG/IFNA5
KEGG_PANTOTHENATE_AND_COA_BIOSYNTHESIS	KEGG_PANTOTHENATE_AND_COA_BIOSYNTHESIS	15	0.290983	0.588169	0.96664	1	1	8199	tags=27%, list=27%, signal=20%	UPB1/PPCDC/PANK4/PPCS
KEGG_STARCH_AND_SUCROSE_METABOLISM	KEGG_STARCH_AND_SUCROSE_METABOLISM	31	-0.276566	-0.644252	0.969631	1	1	3456	tags=16%, list=11%, signal=14%	MGAM/PYGM/UGT2B17/UGT2B10
KEGG_TOLL_LIKE_RECEPTOR_SIGNALING_PATHWAY	KEGG_TOLL_LIKE_RECEPTOR_SIGNALING_PATHWAY	78	0.267641	0.736845	0.970765	1	1	5688	tags=18%, list=19%, signal=15%	CXCL10/TICAM2/CXCL11/PIK3CG/LBP/CD14/IL6/IL12A/CXCL8/PIK3R1/PIK3R2/TLR1/MAP2K7/PIK3CD
KEGG_LONG_TERM_POTENTIATION	KEGG_LONG_TERM_POTENTIATION	62	-0.272668	-0.718258	0.971612	1	1	1464	tags=11%, list=5%, signal=11%	PLCB2/CALM1/GRIN2D/CAMK2A/ADCY8/PRKCG
KEGG_GAP_JUNCTION	KEGG_GAP_JUNCTION	83	-0.264949	-0.730555	0.974488	1	1	2113	tags=12%, list=7%, signal=11%	TUBA1A/GUCY1A2/TUBB2B/HTR2A/DRD2/TUBB4A/ADCY8/PRKCG/DRD1
KEGG_VIRAL_MYOCARDITIS	KEGG_VIRAL_MYOCARDITIS	54	0.270425	0.703168	0.975159	1	1	4722	tags=11%, list=15%, signal=9%	MYH14/HLA-DMB/HLA-DQB1/DAG1/RAC2/MYH7B
KEGG_AMINOACYL_TRNA_BIOSYNTHESIS	KEGG_AMINOACYL_TRNA_BIOSYNTHESIS	22	-0.27265	-0.594864	0.976872	1	1	22253	tags=100%, list=73%, signal=27%	FARS2/MARS2/PARS2/VARS2/DARS2/SARS2/FARSB/IARS2/HARS2/WARS2/LARS2/SEPSECS/EARS2/TARS2/FARSA/YARS2/RARS2/CARS2/NARS2/MTFMT/PSTK
KEGG_NUCLEOTIDE_EXCISION_REPAIR	KEGG_NUCLEOTIDE_EXCISION_REPAIR	44	-0.266422	-0.663283	0.978007	1	1	858	tags=34%, list=3%, signal=33%	RFC4/MNAT1/POLD2/ERCC6/GTF2H5/PCNA/RPA2/RPA3/DDB2/POLE4/POLD1/POLD4/RFC2/RPA4
KEGG_LYSINE_DEGRADATION	KEGG_LYSINE_DEGRADATION	44	0.267653	0.671879	0.981291	1	1	9767	tags=41%, list=32%, signal=28%	SETMAR/ALDH3A2/KMT5B/KMT5C/SETD1B/SUV39H1/ACAT2/SETD1A/OGDH/ALDH2/NSD3/TMLHE/NSD1/HADHA/NSD2/DOT1L/AASS/SETD7
KEGG_PORPHYRIN_AND_CHLOROPHYLL_METABOLISM	KEGG_PORPHYRIN_AND_CHLOROPHYLL_METABOLISM	25	-0.265069	-0.593689	0.98248	1	1	2955	tags=12%, list=10%, signal=11%	UGT2B17/UGT2B10
KEGG_LINOLEIC_ACID_METABOLISM	KEGG_LINOLEIC_ACID_METABOLISM	18	0.266321	0.559733	0.982955	1	1	7145	tags=33%, list=23%, signal=26%	PLA2G2A/AKR1B10/CYP3A7/CYP3A5/ALOX15/CYP2J2
KEGG_HOMOLOGOUS_RECOMBINATION	KEGG_HOMOLOGOUS_RECOMBINATION	28	-0.267029	-0.611057	0.984277	1	1	858	tags=32%, list=3%, signal=31%	RPA3/TOP3B/BRCA2/EME1/POLD1/POLD4/BLM/RPA4
KEGG_PHENYLALANINE_METABOLISM	KEGG_PHENYLALANINE_METABOLISM	17	-0.262546	-0.543609	0.985545	1	1	8178	tags=47%, list=27%, signal=34%	MAOA/DDC/IL4I1/GOT1/NAA80/AOC2/TAT
KEGG_TGF_BETA_SIGNALING_PATHWAY	KEGG_TGF_BETA_SIGNALING_PATHWAY	80	0.258386	0.714427	0.985676	1	1	9683	tags=31%, list=32%, signal=21%	BMP7/NODAL/AMH/ROCK1/ID4/INHBC/BMP8B/CHRD/INHBB/ID1/SMURF1/THBS2/SKP1/EP300/PPP2R1B/MYC/CREBBP/SMAD9/ZFYVE16/ID2/ID3/RPS6KB1/BMP8A/CUL1/ACVR2B
KEGG_LONG_TERM_DEPRESSION	KEGG_LONG_TERM_DEPRESSION	58	0.260913	0.685795	0.985735	1	1	2145	tags=5%, list=7%, signal=5%	GRID2/GRIA2/PLA2G2A
KEGG_GLYCOSAMINOGLYCAN_BIOSYNTHESIS_HEPARAN_SULFATE	KEGG_GLYCOSAMINOGLYCAN_BIOSYNTHESIS_HEPARAN_SULFATE	23	0.25941	0.574767	0.987226	1	1	5467	tags=13%, list=18%, signal=11%	HS3ST2/NDST3/NDST1
KEGG_NATURAL_KILLER_CELL_MEDIATED_CYTOTOXICITY	KEGG_NATURAL_KILLER_CELL_MEDIATED_CYTOTOXICITY	92	-0.254278	-0.711533	0.989776	1	1	3657	tags=7%, list=12%, signal=6%	FCER1G/RAET1E/LCP2/PRKCG/IFNA5
KEGG_TERPENOID_BACKBONE_BIOSYNTHESIS	KEGG_TERPENOID_BACKBONE_BIOSYNTHESIS	13	-0.255103	-0.49629	0.989837	1	1	22787	tags=100%, list=75%, signal=26%	ACAT2/PDSS2/DHDDS/ACAT1/HMGCR/FDPS/MVD/MVK/GGPS1/PMVK/IDI1/HMGCS1
KEGG_FC_EPSILON_RI_SIGNALING_PATHWAY	KEGG_FC_EPSILON_RI_SIGNALING_PATHWAY	62	0.25601	0.680847	0.990739	1	1	5900	tags=16%, list=19%, signal=13%	PLA2G2A/PIK3CG/IL13/RAC2/VAV2/PIK3R1/PIK3R2/MAP2K7/PIK3CD/PLCG2
KEGG_ADHERENS_JUNCTION	KEGG_ADHERENS_JUNCTION	73	-0.254757	-0.689185	0.991271	1	1	4914	tags=8%, list=16%, signal=7%	CTNNA3/PTPN6/WAS/ACTN3/CTNNA2
KEGG_LIMONENE_AND_PINENE_DEGRADATION	KEGG_LIMONENE_AND_PINENE_DEGRADATION	10	-0.237894	-0.435878	0.992781	1	1	6617	tags=20%, list=22%, signal=16%	NAA80
KEGG_PEROXISOME	KEGG_PEROXISOME	74	-0.253762	-0.686933	0.993173	1	1	9384	tags=33%, list=31%, signal=23%	PEX11G/PEX6/GNPAT/PEX13/PRDX5/ACOX2/PEX11A/PEX26/PECR/NUDT19/ACSL5/PMVK/HMGCL/PEX16/EHHADH/PEX5/PXMP2/PEX11B/PEX19/SLC27A2/PEX2/FAR2/NOS2/DDO
KEGG_REGULATION_OF_ACTIN_CYTOSKELETON	KEGG_REGULATION_OF_ACTIN_CYTOSKELETON	193	0.249915	0.777691	0.994782	1	1	6183	tags=16%, list=20%, signal=12%	ITGAX/FGF22/MYH14/CHRM4/TMSB4Y/PIK3CG/FGFR3/FGF11/ITGB8/MYLPF/FGF17/FGD3/MYLK3/CD14/CHRM2/BDKRB1/RAC2/VAV2/ACTN2/CHRM3/ROCK1/CYFIP2/PIK3R1/PIK3R2/EGF/FGF20/PIK3CD/ITGA9/APC2/ITGA6
KEGG_CHEMOKINE_SIGNALING_PATHWAY	KEGG_CHEMOKINE_SIGNALING_PATHWAY	156	0.24358	0.740482	0.996439	1	1	5773	tags=17%, list=19%, signal=14%	PF4V1/CXCL10/CXCR6/CXCL11/PIK3CG/GNG2/CCL27/GNG3/CCR7/CCL7/CCR1/CXCL1/ADCY1/RAC2/VAV2/CXCL14/PRKCZ/CCL8/ROCK1/CXCL8/PIK3R1/ITK/PIK3R2/CXCL5/PIK3CD/FGR/CCL4L2
KEGG_HYPERTROPHIC_CARDIOMYOPATHY_HCM	KEGG_HYPERTROPHIC_CARDIOMYOPATHY_HCM	71	0.235957	0.6415	0.996892	1	1	6471	tags=17%, list=21%, signal=13%	TNNT2/CACNG4/ITGB8/PRKAG3/CACNA2D2/IL6/DAG1/CACNA1F/CACNB4/ITGA9/ITGA6/CACNA2D3
KEGG_GLYCEROLIPID_METABOLISM	KEGG_GLYCEROLIPID_METABOLISM	44	0.237056	0.595072	0.997122	1	1	8926	tags=34%, list=29%, signal=24%	CEL/DGKI/LIPG/GLYCTK/ALDH3A2/GK/GPAT3/AGPAT4/AGK/PLPP3/GPAT2/ALDH2/DGKG/GPAT4/MBOAT1
KEGG_GLYCOSAMINOGLYCAN_BIOSYNTHESIS_KERATAN_SULFATE	KEGG_GLYCOSAMINOGLYCAN_BIOSYNTHESIS_KERATAN_SULFATE	15	0.217359	0.439353	0.997152	1	1	6952	tags=20%, list=23%, signal=15%	CHST4/ST3GAL1/B4GALT4
KEGG_MELANOGENESIS	KEGG_MELANOGENESIS	90	0.242919	0.684554	0.997303	1	1	4567	tags=11%, list=15%, signal=9%	WNT11/ASIP/WNT8B/CAMK2B/WNT2/WNT10B/ADCY1/EDNRB/CREB3L3/EDN1
KEGG_CITRATE_CYCLE_TCA_CYCLE	KEGG_CITRATE_CYCLE_TCA_CYCLE	29	0.223514	0.518773	0.997363	1	1	11467	tags=34%, list=37%, signal=22%	SUCLG2P2/DLAT/OGDH/IDH3A/ACO1/ACO2/IDH1/FH/ACLY/CS
KEGG_COLORECTAL_CANCER	KEGG_COLORECTAL_CANCER	60	0.24006	0.635672	0.997533	1	1	7584	tags=15%, list=25%, signal=11%	PIK3CG/RAC2/PIK3R1/PIK3R2/PIK3CD/LEF1/APC2/TCF7/MYC
KEGG_RNA_DEGRADATION	KEGG_RNA_DEGRADATION	57	-0.228315	-0.594455	0.997668	1	1	23616	tags=30%, list=77%, signal=7%	HSPA9/EXOSC7/LSM7/EXOSC6/EXOSC8/ENO2/EXOSC9/EXOSC3/CNOT7/EXOSC4/EXOSC5/LSM6/LSM1/ENO3/LSM4/PAPOLA
KEGG_SPLICEOSOME	KEGG_SPLICEOSOME	126	0.241905	0.714854	0.997686	1	1	11801	tags=49%, list=39%, signal=30%	SNRPG/PRPF38B/THOC1/CCDC12/SNRPE/THOC2/HSPA1A/RBM17/DDX42/ALYREF/NCBP2/HNRNPM/SNU13/HSPA1B/DDX5/PRPF38A/SNRPF/CDC5L/SNRNP27/HSPA8/HNRNPA3/PPIL1/SNRPD1/PRPF8/TCERG1/SNRPC/HNRNPU/USP39/AQR/BUD31/SNRNP70/DHX16/DDX46/SLU7/PRPF4/SF3A3/WBP11/MAGOHB/SNRPB2/SRSF9/HNRNPK/PRPF18/PRPF40A/MAGOH/SNRNP200/THOC3/CWC15/DHX38/RBM8A/ACIN1/HSPA2/DHX8/SRSF6/EFTUD2/SF3B3/LSM8/NCBP1/HSPA1L/DDX23/SNRPD3/ISY1/U2AF2
KEGG_PATHOGENIC_ESCHERICHIA_COLI_INFECTION	KEGG_PATHOGENIC_ESCHERICHIA_COLI_INFECTION	54	0.234619	0.610064	0.997742	1	1	5016	tags=15%, list=16%, signal=12%	TUBA8/TUBB1/TUBB8/CDH1/CD14/TUBB6/CTTN/ROCK1
KEGG_ERBB_SIGNALING_PATHWAY	KEGG_ERBB_SIGNALING_PATHWAY	83	-0.236225	-0.651354	0.998261	1	1	1952	tags=5%, list=6%, signal=5%	TGFA/CAMK2A/PRKCG
KEGG_OXIDATIVE_PHOSPHORYLATION	KEGG_OXIDATIVE_PHOSPHORYLATION	123	0.237475	0.69889	0.998319	1	1	2620	tags=3%, list=9%, signal=3%	COX8C/ATP6V0A4/ATP6V0D2/COX6B2
KEGG_ENDOMETRIAL_CANCER	KEGG_ENDOMETRIAL_CANCER	51	0.224259	0.578913	0.998566	1	1	7584	tags=24%, list=25%, signal=18%	PIK3CG/CDH1/PIK3R1/PIK3R2/EGF/PIK3CD/LEF1/APC2/TCF7/SOS1/EGFR/MYC
KEGG_EPITHELIAL_CELL_SIGNALING_IN_HELICOBACTER_PYLORI_INFECTION	KEGG_EPITHELIAL_CELL_SIGNALING_IN_HELICOBACTER_PYLORI_INFECTION	63	0.233752	0.62342	0.998566	1	1	6841	tags=16%, list=22%, signal=12%	ATP6V0A4/ATP6V0D2/CXCL1/ATP6V1G2/CXCL8/ATP6V0A1/ATP6V1E2/PLCG2/ATP6V1C1/MAP2K4
KEGG_VALINE_LEUCINE_AND_ISOLEUCINE_DEGRADATION	KEGG_VALINE_LEUCINE_AND_ISOLEUCINE_DEGRADATION	43	0.213378	0.533351	0.998975	1	1	24068	tags=100%, list=79%, signal=21%	ALDH3A2/BCKDHA/OXCT2/ABAT/BCKDHB/ACAT2/ALDH2/HADHA/MCCC1/HIBCH/ACAT1/ACAA1/ALDH6A1/DLD/MCCC2/AOX1/ALDH9A1/ECHS1/ACAD8/ACADSB/ALDH7A1/HADHB/HSD17B10/DBT/ALDH1B1/ACAA2/AUH/MCEE/MMUT/BCAT1/PCCB/IVD/ACADM/BCAT2/HADH/OXCT1/PCCA/HMGCL/HIBADH/ACADS/IL4I1/EHHADH/HMGCS1
KEGG_VEGF_SIGNALING_PATHWAY	KEGG_VEGF_SIGNALING_PATHWAY	66	0.227647	0.610963	0.99917	1	1	6043	tags=15%, list=20%, signal=12%	PLA2G2A/PIK3CG/RAC2/NFAT5/PIK3R1/PIK3R2/KDR/PIK3CD/PLCG2/NOS3
KEGG_BIOSYNTHESIS_OF_UNSATURATED_FATTY_ACIDS	KEGG_BIOSYNTHESIS_OF_UNSATURATED_FATTY_ACIDS	22	0.198802	0.4352	0.999184	1	1	9216	tags=32%, list=30%, signal=22%	FADS2/ACOT4/ACOX1/SCD5/BAAT/HADHA/ACOX3
KEGG_GALACTOSE_METABOLISM	KEGG_GALACTOSE_METABOLISM	22	0.196021	0.429113	0.999184	1	1	24594	tags=100%, list=80%, signal=20%	GCK/HK1/GAA/GANC/HK2/PFKL/B4GALT1/AKR1B1/PFKP/PFKM/GLA/PGM1/UGP2/GALE/PGM2/GLB1/B4GALT2/GALK1/GALK2/GALT/LCT/MGAM
KEGG_GLYCOSYLPHOSPHATIDYLINOSITOL_GPI_ANCHOR_BIOSYNTHESIS	KEGG_GLYCOSYLPHOSPHATIDYLINOSITOL_GPI_ANCHOR_BIOSYNTHESIS	25	-0.196196	-0.439431	0.999213	1	1	8988	tags=36%, list=29%, signal=25%	PIGF/PIGM/PIGV/GPAA1/PIGS/PIGQ/PIGL/PGAP1
KEGG_MTOR_SIGNALING_PATHWAY	KEGG_MTOR_SIGNALING_PATHWAY	48	0.219407	0.560435	0.999388	1	1	10059	tags=27%, list=33%, signal=18%	PIK3CG/RPS6KA1/PIK3R1/PIK3R2/PIK3CD/RICTOR/TSC2/PIK3R3/RPS6KB1/VEGFA/EIF4E2/RPS6KA2/PRKAA1
KEGG_FOCAL_ADHESION	KEGG_FOCAL_ADHESION	186	-0.23066	-0.701761	0.99962	1	1	4854	tags=12%, list=16%, signal=10%	BRAF/ITGB7/MAPK10/ITGA2B/VWF/PPP1CC/TNXB/RELN/RASGRF1/ITGB4/BIRC3/IGF1/FLT1/COL6A6/ITGB6/THBS4/ACTN3/MYLK2/PAK6/PARVG/PRKCG
KEGG_GLYCEROPHOSPHOLIPID_METABOLISM	KEGG_GLYCEROPHOSPHOLIPID_METABOLISM	69	0.217113	0.58656	0.999792	1	1	8931	tags=30%, list=29%, signal=22%	PLA2G2A/ACHE/DGKI/ETNK2/GPD1/PHOSPHO1/GPAT3/GPD2/PISD/AGPAT4/PGS1/MBOAT7/PLPP3/GPAT2/DGKG/LPGAT1/PCYT1A/GPAT4/LPCAT3/MBOAT1/ETNK1
KEGG_PROGESTERONE_MEDIATED_OOCYTE_MATURATION	KEGG_PROGESTERONE_MEDIATED_OOCYTE_MATURATION	81	0.224719	0.623086	0.999793	1	1	8940	tags=26%, list=29%, signal=18%	CCNA1/PIK3CG/ADCY1/RPS6KA1/PGR/PIK3R1/PIK3R2/CDC25A/PIK3CD/ADCY4/ADCY5/IGF1R/FZR1/ANAPC13/CDK2/PDE3A/SPDYA/ANAPC4/ADCY6/PIK3R3/MAPK8
KEGG_SPHINGOLIPID_METABOLISM	KEGG_SPHINGOLIPID_METABOLISM	36	0.179724	0.435358	0.999796	1	1	1660	tags=3%, list=5%, signal=3%	UGT8
KEGG_BASE_EXCISION_REPAIR	KEGG_BASE_EXCISION_REPAIR	34	0.174233	0.418085	0.999796	1	1	25262	tags=100%, list=83%, signal=17%	HMGB1P1/POLD3/TDG/POLE2/MBD4/LIG1/FEN1/PARP4/POLE/PARP1/NEIL1/POLE3/APEX2/LIG3/POLB/MUTYH/UNG/POLL/MPG/HMGB1/POLD2/NEIL2/XRCC1/PCNA/PARP2/NTHL1/PARP3/POLE4/POLD1/POLD4/APEX1/SMUG1/OGG1/NEIL3

## Sheet: EX-4 vs NC
ID	Description	setSize	enrichmentScore	NES	pvalue	p.adjust	qvalues	rank	leading_edge	core_enrichment
KEGG_STARCH_AND_SUCROSE_METABOLISM	KEGG_STARCH_AND_SUCROSE_METABOLISM	33	-0.709367	-1.66514	0.00381461	0.701888	0.701888	1319	tags=12%, list=4%, signal=12%	UGT2B11/UGT2B17/AMY2A
KEGG_LEISHMANIA_INFECTION	KEGG_LEISHMANIA_INFECTION	55	-0.590357	-1.51412	0.0140872	1	1	3355	tags=18%, list=11%, signal=16%	NCF1/PTPN6/HLA-DPB1/TLR2/FCGR2C/FCGR2A/HLA-DMB/IL12B/NOS2
KEGG_ARGININE_AND_PROLINE_METABOLISM	KEGG_ARGININE_AND_PROLINE_METABOLISM	49	-0.564317	-1.41439	0.0313987	1	1	5597	tags=20%, list=18%, signal=17%	CKB/MAOB/GATM/ARG1/CKM/CKMT1A/CKMT1B/GLS2/NOS2
KEGG_METABOLISM_OF_XENOBIOTICS_BY_CYTOCHROME_P450	KEGG_METABOLISM_OF_XENOBIOTICS_BY_CYTOCHROME_P450	47	-0.575594	-1.43305	0.0314931	1	1	3985	tags=19%, list=13%, signal=17%	GSTA1/CYP2F1/GSTA2/UGT2B11/CYP3A43/CYP2S1/UGT2B17/ADH4
KEGG_TYPE_II_DIABETES_MELLITUS	KEGG_TYPE_II_DIABETES_MELLITUS	37	-0.605002	-1.44354	0.0378368	1	1	2343	tags=16%, list=8%, signal=15%	MAFA/CACNA1D/PIK3CG/SLC2A4/KCNJ11
KEGG_ARRHYTHMOGENIC_RIGHT_VENTRICULAR_CARDIOMYOPATHY_ARVC	KEGG_ARRHYTHMOGENIC_RIGHT_VENTRICULAR_CARDIOMYOPATHY_ARVC	67	-0.496379	-1.31249	0.065787	1	1	2536	tags=12%, list=8%, signal=11%	ITGB6/CACNA1D/DSC2/SGCA/PKP2/ITGA2B/CTNNA2
KEGG_SULFUR_METABOLISM	KEGG_SULFUR_METABOLISM	12	-0.733048	-1.38457	0.0895903	1	1	99	tags=33%, list=0%, signal=33%	CHST11/SULT2B1/SULT1A2
KEGG_DRUG_METABOLISM_OTHER_ENZYMES	KEGG_DRUG_METABOLISM_OTHER_ENZYMES	35	-0.54898	-1.30139	0.106986	1	1	2144	tags=23%, list=7%, signal=21%	CYP2A6/UCK2/NAT2/UPB1/UGT2B11/CYP3A43/UGT2B17
KEGG_ALANINE_ASPARTATE_AND_GLUTAMATE_METABOLISM	KEGG_ALANINE_ASPARTATE_AND_GLUTAMATE_METABOLISM	27	-0.582182	-1.31352	0.109985	1	1	2504	tags=19%, list=8%, signal=17%	ASPA/IL4I1/DDO/GLS2
KEGG_TIGHT_JUNCTION	KEGG_TIGHT_JUNCTION	114	-0.417316	-1.19016	0.120928	1	1	2536	tags=8%, list=8%, signal=7%	CLDN20/CLDN3/CLDN10/MYH14/PRKCQ/LLGL2/CLDN6/CTNNA2
KEGG_SMALL_CELL_LUNG_CANCER	KEGG_SMALL_CELL_LUNG_CANCER	81	-0.44287	-1.20493	0.126344	1	1	5474	tags=15%, list=18%, signal=12%	LAMB3/IKBKG/RARB/ITGA2/PIK3R2/TRAF3/RB1/PIK3CG/COL4A6/ITGA2B/NOS2
KEGG_ASCORBATE_AND_ALDARATE_METABOLISM	KEGG_ASCORBATE_AND_ALDARATE_METABOLISM	12	-0.704397	-1.33045	0.128602	1	1	879	tags=25%, list=3%, signal=24%	UGT2B11/UGT2B17
KEGG_DRUG_METABOLISM_CYTOCHROME_P450	KEGG_DRUG_METABOLISM_CYTOCHROME_P450	50	-0.490783	-1.23471	0.135007	1	1	5720	tags=24%, list=19%, signal=20%	UGT2B15/ALDH3A1/MAOB/CYP2A6/ADH1B/GSTA1/GSTA2/UGT2B11/CYP3A43/UGT2B17/ADH4
KEGG_FOLATE_BIOSYNTHESIS	KEGG_FOLATE_BIOSYNTHESIS	10	-0.726872	-1.32122	0.14098	1	1	696	tags=30%, list=2%, signal=29%	SPR/ALPP
KEGG_RETINOL_METABOLISM	KEGG_RETINOL_METABOLISM	39	-0.510905	-1.22977	0.157219	1	1	4744	tags=23%, list=15%, signal=20%	CYP2A6/ADH1B/DGAT2/RPE65/UGT2B11/CYP3A43/UGT2B17/ADH4
KEGG_ENDOMETRIAL_CANCER	KEGG_ENDOMETRIAL_CANCER	51	-0.471371	-1.19121	0.176728	1	1	8054	tags=39%, list=26%, signal=29%	APC2/RAF1/ARAF/PIK3R3/GRB2/ELK1/HRAS/AXIN2/FOXO3/MAP2K2/CTNNA3/AKT1/BRAF/APC/PIK3R2/CDH1/TCF7L2/PIK3CG/CTNNA2
KEGG_NEUROACTIVE_LIGAND_RECEPTOR_INTERACTION	KEGG_NEUROACTIVE_LIGAND_RECEPTOR_INTERACTION	187	0.363586	1.11318	0.181858	1	1	5453	tags=22%, list=18%, signal=19%	GRID2/GHRHR/GLRA3/AVPR1A/ADRB1/GABRB1/GRIA2/CNR1/CYSLTR2/GABRB2/ADRA2B/PLG/GRIN2B/TAAR1/LPAR6/GABRQ/GRIN2A/GNRHR/HTR1B/P2RY2/CHRM4/CHRM3/PTGER3/PRSS3/ADRA1D/NPFFR2/C5AR1/MC4R/GRIK1/ADORA1/MCHR1/GABRA3/P2RX1/S1PR5/TACR2/FPR2/P2RX6/CHRNB2/CCKBR/CHRM2/ADRB2/ADORA2A
KEGG_TYROSINE_METABOLISM	KEGG_TYROSINE_METABOLISM	37	-0.505021	-1.20498	0.181922	1	1	1945	tags=19%, list=6%, signal=18%	MAOB/ADH1B/IL4I1/HPD/DDC/ADH4
KEGG_T_CELL_RECEPTOR_SIGNALING_PATHWAY	KEGG_T_CELL_RECEPTOR_SIGNALING_PATHWAY	92	-0.412838	-1.14505	0.185808	1	1	5664	tags=15%, list=18%, signal=12%	AKT1/MAPK14/MAPK11/IKBKG/PIK3R2/IFNG/PTPN6/PIK3CG/IL5/PRKCQ/PAK6/LCP2/CD8A
KEGG_PENTOSE_AND_GLUCURONATE_INTERCONVERSIONS	KEGG_PENTOSE_AND_GLUCURONATE_INTERCONVERSIONS	14	-0.636993	-1.24304	0.195289	1	1	2430	tags=57%, list=8%, signal=53%	XYLB/DCXR/AKR1B1/UGT2B15/RPEL1/UGT2B11/UGT2B17
KEGG_ALLOGRAFT_REJECTION	KEGG_ALLOGRAFT_REJECTION	26	-0.541861	-1.20998	0.195781	1	1	3851	tags=27%, list=12%, signal=24%	FAS/IFNG/HLA-DPB1/IL5/HLA-DMB/IL12B
KEGG_LONG_TERM_DEPRESSION	KEGG_LONG_TERM_DEPRESSION	57	0.444838	1.1619	0.197936	1	1	1380	tags=5%, list=4%, signal=5%	GRID2/GRIA2/IGF1
KEGG_REGULATION_OF_AUTOPHAGY	KEGG_REGULATION_OF_AUTOPHAGY	21	-0.568651	-1.21603	0.20108	1	1	3355	tags=14%, list=11%, signal=13%	GABARAPL1/IFNA5
KEGG_PEROXISOME	KEGG_PEROXISOME	73	-0.426923	-1.14383	0.201401	1	1	10447	tags=47%, list=34%, signal=31%	PRDX5/PMVK/GNPAT/ECI2/PEX12/ABCD1/GSTK1/SCP2/MVK/MLYCD/PEX26/PEX6/PXMP4/CRAT/MPV17/ACSL5/ACOX2/PEX13/DHRS4/HACL1/PIPOX/PEX16/PEX2/DECR2/ACOX1/PECR/PEX5/PEX11B/PEX10/AMACR/FAR2/DDO/SLC27A2/NOS2
KEGG_STEROID_HORMONE_BIOSYNTHESIS	KEGG_STEROID_HORMONE_BIOSYNTHESIS	32	-0.509666	-1.18924	0.202628	1	1	2606	tags=16%, list=8%, signal=14%	HSD17B2/UGT2B11/CYP3A43/UGT2B17
KEGG_FRUCTOSE_AND_MANNOSE_METABOLISM	KEGG_FRUCTOSE_AND_MANNOSE_METABOLISM	30	-0.507938	-1.16985	0.230122	1	1	8483	tags=47%, list=28%, signal=34%	PFKFB4/ALDOA/SORD/TSTA3/AKR1B10/PMM2/TPI1/GMDS/AKR1B1/PHPT1/PFKFB3/KHK/PFKFB1
KEGG_CYTOSOLIC_DNA_SENSING_PATHWAY	KEGG_CYTOSOLIC_DNA_SENSING_PATHWAY	39	-0.476098	-1.14599	0.243202	1	1	2842	tags=13%, list=9%, signal=12%	CCL5/IL33/IL18/IFNA5
KEGG_ANTIGEN_PROCESSING_AND_PRESENTATION	KEGG_ANTIGEN_PROCESSING_AND_PRESENTATION	57	-0.435603	-1.1216	0.244432	1	1	3323	tags=12%, list=11%, signal=11%	HSPA2/HLA-DPB1/CREB1/HLA-DMB/CD8A/IFNA5
KEGG_JAK_STAT_SIGNALING_PATHWAY	KEGG_JAK_STAT_SIGNALING_PATHWAY	119	-0.379096	-1.08723	0.258463	1	1	4565	tags=17%, list=15%, signal=14%	IL21R/SPRY1/AKT1/IL6R/PIK3R2/CSF2RA/IL20RB/IL13RA2/IL13/PRLR/IFNG/IL2RB/PTPN6/CRLF2/PIK3CG/IL5/IL12B/CSF2RB/IFNA5
KEGG_PORPHYRIN_AND_CHLOROPHYLL_METABOLISM	KEGG_PORPHYRIN_AND_CHLOROPHYLL_METABOLISM	26	-0.510813	-1.14065	0.268648	1	1	879	tags=31%, list=3%, signal=30%	BLVRB/GUSB/FECH/PPOX/UGT2B15/UGT2B11/UGT2B17
KEGG_INTESTINAL_IMMUNE_NETWORK_FOR_IGA_PRODUCTION	KEGG_INTESTINAL_IMMUNE_NETWORK_FOR_IGA_PRODUCTION	36	-0.472948	-1.12335	0.270901	1	1	3677	tags=17%, list=12%, signal=15%	HLA-DPB1/TNFRSF13C/IL5/HLA-DMB/CCR9
KEGG_GLYCOSPHINGOLIPID_BIOSYNTHESIS_GLOBO_SERIES	KEGG_GLYCOSPHINGOLIPID_BIOSYNTHESIS_GLOBO_SERIES	13	0.586265	1.14167	0.299081	1	1	7643	tags=38%, list=25%, signal=29%	GBGT1/FUT2/B3GALNT1/ST3GAL1/A4GALT
KEGG_PROTEASOME	KEGG_PROTEASOME	44	0.425801	1.06863	0.332705	1	1	337	tags=2%, list=1%, signal=2%	PSMC1P4
KEGG_ECM_RECEPTOR_INTERACTION	KEGG_ECM_RECEPTOR_INTERACTION	80	-0.387852	-1.05372	0.339034	1	1	6762	tags=19%, list=22%, signal=15%	SDC1/GP1BA/RELN/VTN/LAMB3/VWF/ITGA2/THBS4/TNXB/GP5/ITGB6/COL4A6/ITGA2B/COL6A6
KEGG_BUTANOATE_METABOLISM	KEGG_BUTANOATE_METABOLISM	31	0.456976	1.07326	0.340604	1	1	927	tags=6%, list=3%, signal=6%	ACSM4/ACSM5
KEGG_PHENYLALANINE_METABOLISM	KEGG_PHENYLALANINE_METABOLISM	17	-0.531535	-1.0855	0.356781	1	1	1945	tags=35%, list=6%, signal=33%	ALDH3A1/MAOB/IL4I1/HPD/DDC
KEGG_ASTHMA	KEGG_ASTHMA	19	-0.519188	-1.08489	0.357768	1	1	3744	tags=32%, list=12%, signal=28%	IL13/HLA-DPB1/IL5/EPX/HLA-DMB
KEGG_FC_EPSILON_RI_SIGNALING_PATHWAY	KEGG_FC_EPSILON_RI_SIGNALING_PATHWAY	65	-0.397443	-1.04503	0.365831	1	1	5474	tags=18%, list=18%, signal=15%	MAPK14/FCER1G/MAPK11/PIK3R2/IL13/MAP2K6/PLA2G4B/PLA2G3/PIK3CG/IL5/LCP2
KEGG_PATHWAYS_IN_CANCER	KEGG_PATHWAYS_IN_CANCER	301	-0.325014	-1.02171	0.369526	1	1	6079	tags=15%, list=20%, signal=12%	BIRC5/FGF1/TPM3/NKX3-1/AKT1/WNT7B/WNT16/FLT3LG/DVL3/LAMB3/BRAF/WNT10A/IKBKG/APC/RARB/ITGA2/MMP1/PIK3R2/RASSF5/CSF1R/TRAF3/CSF2RA/WNT4/PTCH2/PTCH1/CDH1/TCF7L2/GLI1/RB1/FAS/HHIP/FZD9/TGFA/PIK3CG/SPI1/COL4A6/STK4/ITGA2B/FGF18/WNT8B/KLK3/NOS2/CTNNA2
KEGG_PRIMARY_BILE_ACID_BIOSYNTHESIS	KEGG_PRIMARY_BILE_ACID_BIOSYNTHESIS	14	0.54136	1.07666	0.37314	1	1	3707	tags=21%, list=12%, signal=19%	CYP8B1/CYP7A1/BAAT
KEGG_PANTOTHENATE_AND_COA_BIOSYNTHESIS	KEGG_PANTOTHENATE_AND_COA_BIOSYNTHESIS	16	-0.533482	-1.07186	0.37783	1	1	1114	tags=31%, list=4%, signal=30%	DPYS/BCAT2/VNN1/UPB1
KEGG_EPITHELIAL_CELL_SIGNALING_IN_HELICOBACTER_PYLORI_INFECTION	KEGG_EPITHELIAL_CELL_SIGNALING_IN_HELICOBACTER_PYLORI_INFECTION	65	0.38588	1.02681	0.384763	1	1	3936	tags=8%, list=13%, signal=7%	PTPRZ1/ATP6V1G3/PLCG2/ATP6V0D2/ATP6V1G2
KEGG_ACUTE_MYELOID_LEUKEMIA	KEGG_ACUTE_MYELOID_LEUKEMIA	55	-0.400248	-1.02654	0.394251	1	1	8943	tags=27%, list=29%, signal=19%	PIK3R3/GRB2/HRAS/JUP/RARA/CEBPA/MAP2K2/AKT1/BRAF/IKBKG/PIK3R2/TCF7L2/PIK3CG/SPI1
KEGG_PROXIMAL_TUBULE_BICARBONATE_RECLAMATION	KEGG_PROXIMAL_TUBULE_BICARBONATE_RECLAMATION	21	-0.490023	-1.04789	0.39599	1	1	5334	tags=19%, list=17%, signal=16%	AQP1/SLC38A3/GLS2
KEGG_TYPE_I_DIABETES_MELLITUS	KEGG_TYPE_I_DIABETES_MELLITUS	29	-0.451769	-1.03319	0.403758	1	1	3851	tags=21%, list=12%, signal=18%	FAS/IFNG/HLA-DPB1/HLA-DMB/IL12B
KEGG_AUTOIMMUNE_THYROID_DISEASE	KEGG_AUTOIMMUNE_THYROID_DISEASE	28	-0.453063	-1.03007	0.410212	1	1	3851	tags=21%, list=12%, signal=19%	TSHR/HLA-DPB1/IL5/HLA-DMB/IFNA5
KEGG_TASTE_TRANSDUCTION	KEGG_TASTE_TRANSDUCTION	33	0.4283	1.01765	0.421307	1	1	8433	tags=45%, list=27%, signal=33%	TAS2R50/GNG3/TAS2R10/TAS2R5/PDE1A/TAS2R43/PLCB2/TAS2R31/TAS2R14/GNB3/CACNA1A/PRKACA/SCNN1A/ADCY4/GNAS
KEGG_MATURITY_ONSET_DIABETES_OF_THE_YOUNG	KEGG_MATURITY_ONSET_DIABETES_OF_THE_YOUNG	12	-0.554429	-1.0472	0.425799	1	1	6641	tags=50%, list=22%, signal=39%	NR5A2/BHLHA15/NKX6-1/MAFA/HNF4G
KEGG_BASAL_CELL_CARCINOMA	KEGG_BASAL_CELL_CARCINOMA	49	-0.403763	-1.01198	0.428164	1	1	5439	tags=27%, list=18%, signal=22%	WNT16/DVL3/WNT10A/APC/WNT4/PTCH2/PTCH1/TCF7L2/GLI1/HHIP/FZD9/WNT8B
KEGG_PATHOGENIC_ESCHERICHIA_COLI_INFECTION	KEGG_PATHOGENIC_ESCHERICHIA_COLI_INFECTION	52	0.387456	0.998567	0.444398	1	1	4754	tags=17%, list=15%, signal=15%	WAS/TUBB8/TUBA8/TUBB1/CLDN1/ARPC5/CD14/TUBA3D/ROCK1
KEGG_FOCAL_ADHESION	KEGG_FOCAL_ADHESION	188	-0.329949	-0.995314	0.459593	1	1	5474	tags=13%, list=18%, signal=11%	PARVB/RAP1A/SHC2/RELN/VTN/AKT1/LAMB3/BRAF/VWF/ITGA2/PIK3R2/RASGRF1/THBS4/MYLK2/TNXB/FLT1/ACTN3/ITGB6/PIK3CG/COL4A6/PAK6/ITGA2B/COL6A6/PARVG
KEGG_RENIN_ANGIOTENSIN_SYSTEM	KEGG_RENIN_ANGIOTENSIN_SYSTEM	12	-0.533825	-1.00828	0.47128	1	1	1750	tags=33%, list=6%, signal=31%	AGT/THOP1/CPA3
KEGG_CYTOKINE_CYTOKINE_RECEPTOR_INTERACTION	KEGG_CYTOKINE_CYTOKINE_RECEPTOR_INTERACTION	188	-0.327628	-0.988314	0.4825	1	1	5405	tags=18%, list=18%, signal=15%	FLT3LG/EDA/TNFSF13/IL6R/IL1R2/CXCL3/CCL20/CSF1R/CSF2RA/CCL3L1/IL20RB/FAS/IL13/CXCR4/PRLR/BMP7/IL1R1/IFNG/CCL8/IL2RB/CRLF2/FLT1/TNFRSF13C/CCL5/IL5/CX3CR1/INHBC/IL18/CCL19/IL12B/CSF2RB/CCR9/IFNA5
KEGG_HEMATOPOIETIC_CELL_LINEAGE	KEGG_HEMATOPOIETIC_CELL_LINEAGE	56	-0.379074	-0.974461	0.495418	1	1	5472	tags=23%, list=18%, signal=19%	FLT3LG/IL6R/IL1R2/ITGA2/CSF1R/CSF2RA/IL1R1/GP5/CD7/IL5/ITGA2B/CD8A
KEGG_ADIPOCYTOKINE_SIGNALING_PATHWAY	KEGG_ADIPOCYTOKINE_SIGNALING_PATHWAY	59	-0.37566	-0.973063	0.500094	1	1	8073	tags=20%, list=26%, signal=15%	NFKBIA/PRKAG3/CPT1C/ADIPOR1/PRKAG1/NFKBIE/AKT1/IKBKG/PPARA/PRKCQ/SLC2A4
KEGG_CYSTEINE_AND_METHIONINE_METABOLISM	KEGG_CYSTEINE_AND_METHIONINE_METABOLISM	32	0.408749	0.965169	0.504946	1	1	1721	tags=9%, list=6%, signal=9%	LDHAL6B/SDS/TAT
KEGG_GLYCEROLIPID_METABOLISM	KEGG_GLYCEROLIPID_METABOLISM	44	-0.392323	-0.965597	0.507363	1	1	9330	tags=39%, list=30%, signal=27%	PLPP1/AGPAT2/DGAT1/GPAM/PLPP2/LPL/AKR1A1/DGKZ/AGPAT3/DGKQ/CEL/AKR1B1/DGKG/DGKI/DGAT2/DGKB
KEGG_AMYOTROPHIC_LATERAL_SCLEROSIS_ALS	KEGG_AMYOTROPHIC_LATERAL_SCLEROSIS_ALS	46	0.382017	0.966334	0.511608	1	1	2265	tags=7%, list=7%, signal=6%	GRIA2/GRIN2B/GRIN2A
KEGG_LINOLEIC_ACID_METABOLISM	KEGG_LINOLEIC_ACID_METABOLISM	19	-0.462052	-0.9655	0.517986	1	1	2930	tags=21%, list=10%, signal=19%	PLA2G3/ALOX15/CYP3A43
KEGG_STEROID_BIOSYNTHESIS	KEGG_STEROID_BIOSYNTHESIS	16	-0.477363	-0.959111	0.520492	1	1	7026	tags=31%, list=23%, signal=24%	CEL/EBP/TM7SF2/SC5D
KEGG_MELANOGENESIS	KEGG_MELANOGENESIS	89	-0.344656	-0.950797	0.557175	1	1	8918	tags=35%, list=29%, signal=25%	DCT/TYRP1/FZD8/FZD5/FZD2/CREB3L1/PRKX/MITF/HRAS/WNT9A/ADCY2/ADCY7/MAP2K2/ADCY6/GNAO1/ADCY5/WNT7B/WNT16/DVL3/WNT10A/CALML6/WNT4/TCF7L2/FZD9/CAMK2B/EDN1/CAMK2A/CREB1/ASIP/WNT8B
KEGG_RIBOSOME	KEGG_RIBOSOME	87	-0.343861	-0.945731	0.56862	1	1	11438	tags=44%, list=37%, signal=28%	RPS12/RPSA/RPL12/RPS15A/RPLP1/RPL35/RPL11/RPL27/RPL17/RPL13/RPL37A/RPL9/RPLP2/UBA52/RPL10/RPL28/RPL29/RPL18/RPL13A/RPL18A/RPS29/RPS3/RPS21/RPS11/RPS16/RPS9/RPS28/RPL7A/RPLP0/RPL4/RPS5/RPS2/RPL15/RPS3A/RPL31/RPL39/RSL24D1P11
KEGG_INSULIN_SIGNALING_PATHWAY	KEGG_INSULIN_SIGNALING_PATHWAY	122	-0.330625	-0.950919	0.569483	1	1	10597	tags=34%, list=34%, signal=23%	RPTOR/CALM1/INPP5K/FASN/FLOT2/CBL/PYGB/PRKCZ/SOCS1/PCK2/MAPK10/SHC4/RAF1/PHKG2/ARAF/PIK3R3/GRB2/PPP1CC/MKNK2/PRKAR2B/ELK1/PRKX/HRAS/SORBS1/PRKAR2A/PRKAG3/PPP1CA/MAP2K2/SHC2/LIPE/PRKAG1/PHKA1/AKT1/BRAF/PIK3R2/CALML6/SH2B2/RHOQ/PIK3CG/PYGM/SLC2A4
KEGG_PPAR_SIGNALING_PATHWAY	KEGG_PPAR_SIGNALING_PATHWAY	59	0.356031	0.93347	0.585444	1	1	2664	tags=8%, list=9%, signal=8%	ACADL/AQP7/CYP8B1/CYP7A1/FABP4
KEGG_NOTCH_SIGNALING_PATHWAY	KEGG_NOTCH_SIGNALING_PATHWAY	44	0.368276	0.924263	0.590404	1	1	1495	tags=5%, list=5%, signal=4%	DLL4/NOTCH4
KEGG_RIG_I_LIKE_RECEPTOR_SIGNALING_PATHWAY	KEGG_RIG_I_LIKE_RECEPTOR_SIGNALING_PATHWAY	56	-0.35942	-0.923938	0.596411	1	1	348	tags=11%, list=1%, signal=11%	MAPK11/IKBKG/TRAF3/IL12B/IFNA5
KEGG_BETA_ALANINE_METABOLISM	KEGG_BETA_ALANINE_METABOLISM	22	-0.420764	-0.909323	0.602347	1	1	1114	tags=23%, list=4%, signal=22%	ACADM/SRM/DPYS/UPB1
KEGG_PRIMARY_IMMUNODEFICIENCY	KEGG_PRIMARY_IMMUNODEFICIENCY	26	-0.405301	-0.905045	0.607095	1	1	283	tags=12%, list=1%, signal=11%	CD79A/CD8A
KEGG_NON_SMALL_CELL_LUNG_CANCER	KEGG_NON_SMALL_CELL_LUNG_CANCER	50	-0.363624	-0.914806	0.614946	1	1	7910	tags=34%, list=26%, signal=25%	PIK3R3/GRB2/HRAS/FOXO3/FHIT/MAP2K2/RASSF1/AKT1/BRAF/RARB/PIK3R2/RASSF5/RB1/TGFA/PIK3CG/STK4
KEGG_SNARE_INTERACTIONS_IN_VESICULAR_TRANSPORT	KEGG_SNARE_INTERACTIONS_IN_VESICULAR_TRANSPORT	38	-0.374873	-0.899778	0.62581	1	1	9211	tags=39%, list=30%, signal=28%	STX3/SNAP23/GOSR2/VAMP1/STX18/TSNARE1/SNAP47/STX5/VAMP5/YKT6/VAMP8/STX6/VAMP7/STX19
KEGG_CHRONIC_MYELOID_LEUKEMIA	KEGG_CHRONIC_MYELOID_LEUKEMIA	71	-0.342884	-0.914496	0.632475	1	1	9791	tags=25%, list=32%, signal=17%	CDK6/SHC4/RAF1/ARAF/PIK3R3/GRB2/HRAS/NFKBIA/MAP2K2/CTBP1/SHC2/AKT1/BRAF/IKBKG/PIK3R2/RB1/PIK3CG
KEGG_DORSO_VENTRAL_AXIS_FORMATION	KEGG_DORSO_VENTRAL_AXIS_FORMATION	22	0.404687	0.884871	0.633222	1	1	1495	tags=5%, list=5%, signal=4%	NOTCH4
KEGG_VIBRIO_CHOLERAE_INFECTION	KEGG_VIBRIO_CHOLERAE_INFECTION	50	0.351332	0.899723	0.639469	1	1	8633	tags=28%, list=28%, signal=20%	ATP6V1G3/PLCG2/ATP6V0D2/ATP6V1G2/ATP6V1H/ATP6V1C1/PRKACA/ATP6V0A1/ATP6V1G1/SEC61A2/TJP2/GNAS/SEC61G/SEC61A1
KEGG_GLYCOSPHINGOLIPID_BIOSYNTHESIS_GANGLIO_SERIES	KEGG_GLYCOSPHINGOLIPID_BIOSYNTHESIS_GANGLIO_SERIES	14	-0.442428	-0.863363	0.656133	1	1	2181	tags=36%, list=7%, signal=33%	ST6GALNAC6/ST6GALNAC4/ST3GAL5/ST6GALNAC3
KEGG_BASE_EXCISION_REPAIR	KEGG_BASE_EXCISION_REPAIR	34	-0.374143	-0.881476	0.657854	1	1	9998	tags=62%, list=32%, signal=42%	LIG3/PCNA/APEX2/UNG/XRCC1/LIG1/POLL/NEIL2/MPG/POLE4/PARP3/NEIL3/POLD2/APEX1/POLD1/HMGB1/SMUG1/MUTYH/NTHL1/TDG
KEGG_SYSTEMIC_LUPUS_ERYTHEMATOSUS	KEGG_SYSTEMIC_LUPUS_ERYTHEMATOSUS	42	-0.365029	-0.889384	0.658116	1	1	4055	tags=19%, list=13%, signal=17%	C6/IFNG/HLA-DPB1/ACTN3/FCGR2C/FCGR2A/HLA-DMB
KEGG_COMPLEMENT_AND_COAGULATION_CASCADES	KEGG_COMPLEMENT_AND_COAGULATION_CASCADES	55	0.344938	0.895922	0.66035	1	1	5229	tags=20%, list=17%, signal=17%	F7/PLG/C9/F13A1/SERPINC1/SERPINF2/SERPINA5/C5AR1/MASP2/PROS1/C4B
KEGG_RIBOFLAVIN_METABOLISM	KEGG_RIBOFLAVIN_METABOLISM	15	0.427266	0.861357	0.660652	1	1	8570	tags=40%, list=28%, signal=29%	ACP4/MTMR7/ACPP/FLAD1/MTMR1/ACP2
KEGG_HEDGEHOG_SIGNALING_PATHWAY	KEGG_HEDGEHOG_SIGNALING_PATHWAY	48	-0.354284	-0.883486	0.679534	1	1	5439	tags=23%, list=18%, signal=19%	WNT16/WNT10A/WNT4/PTCH2/PTCH1/GLI1/HHIP/BMP7/IHH/WNT8B
KEGG_LEUKOCYTE_TRANSENDOTHELIAL_MIGRATION	KEGG_LEUKOCYTE_TRANSENDOTHELIAL_MIGRATION	100	-0.32331	-0.905493	0.685494	1	1	5277	tags=17%, list=17%, signal=14%	MAPK11/CLDN4/PIK3R2/RASSF5/ESAM/TXK/CXCR4/NCF1/ACTN3/CLDN20/NOX3/PIK3CG/CLDN3/CLDN10/CLDN6/CTNNA2
KEGG_CALCIUM_SIGNALING_PATHWAY	KEGG_CALCIUM_SIGNALING_PATHWAY	153	0.30679	0.918716	0.685521	1	1	5695	tags=18%, list=18%, signal=15%	AVPR1A/ADRB1/CYSLTR2/GNA15/ERBB4/SLC8A3/PDE1B/PLCG2/GRIN2A/ERBB3/CHRM3/PTGER3/ADRA1D/GNAL/TNNC1/PDE1A/ATP2B4/RYR1/P2RX1/TACR2/P2RX6/CCKBR/CHRM2/NOS3/ADRB2/ADORA2A/CCKAR/PLCB2
KEGG_TOLL_LIKE_RECEPTOR_SIGNALING_PATHWAY	KEGG_TOLL_LIKE_RECEPTOR_SIGNALING_PATHWAY	80	-0.327969	-0.891031	0.693291	1	1	5474	tags=16%, list=18%, signal=13%	MAPK14/MAPK11/TLR6/IKBKG/PIK3R2/TRAF3/MAP2K6/TLR2/CCL5/PIK3CG/IL12B/IFNA5
KEGG_OLFACTORY_TRANSDUCTION	KEGG_OLFACTORY_TRANSDUCTION	73	-0.332497	-0.890838	0.693924	1	1	4735	tags=22%, list=15%, signal=19%	PRKG2/CALML6/CLCA2/CAMK2B/OR5K2/OR2L2/OR2A4/CAMK2A/OR2M4/OR2H2/OR1L8/OR2AE1/OR4F16/OR56B1/OR51E2
KEGG_HOMOLOGOUS_RECOMBINATION	KEGG_HOMOLOGOUS_RECOMBINATION	28	0.372802	0.857547	0.695579	1	1	4636	tags=11%, list=15%, signal=9%	RAD54B/RPA4/POLD3
KEGG_BASAL_TRANSCRIPTION_FACTORS	KEGG_BASAL_TRANSCRIPTION_FACTORS	34	0.361353	0.864211	0.698871	1	1	3169	tags=6%, list=10%, signal=5%	TAF1L/GTF2A1L
KEGG_PROTEIN_EXPORT	KEGG_PROTEIN_EXPORT	24	0.378415	0.845975	0.700496	1	1	11876	tags=54%, list=39%, signal=33%	IMMP2L/SRP9P1/SEC61A2/SRP68/SEC61G/SEC61A1/SPCS3/SRP19/HSPA5/SRPRB/SRP72/SRP9/SEC63
KEGG_LONG_TERM_POTENTIATION	KEGG_LONG_TERM_POTENTIATION	60	0.334067	0.879948	0.70592	1	1	2265	tags=5%, list=7%, signal=5%	GRIA2/GRIN2B/GRIN2A
KEGG_ADHERENS_JUNCTION	KEGG_ADHERENS_JUNCTION	73	-0.330118	-0.884466	0.707931	1	1	4216	tags=7%, list=14%, signal=6%	TCF7L2/PTPN6/ACTN3/CTNNA2
KEGG_VASOPRESSIN_REGULATED_WATER_REABSORPTION	KEGG_VASOPRESSIN_REGULATED_WATER_REABSORPTION	38	-0.349519	-0.838923	0.741708	1	1	6622	tags=24%, list=21%, signal=19%	PRKX/DCTN4/ADCY6/DCTN5/NSF/RAB5C/RAB5B/CREB1
KEGG_PYRUVATE_METABOLISM	KEGG_PYRUVATE_METABOLISM	37	0.337838	0.8209	0.78549	1	1	613	tags=3%, list=2%, signal=3%	LDHAL6B
KEGG_HISTIDINE_METABOLISM	KEGG_HISTIDINE_METABOLISM	25	-0.358154	-0.794297	0.788321	1	1	5192	tags=24%, list=17%, signal=20%	FTCD/ALDH3A1/MAOB/ASPA/DDC
KEGG_NITROGEN_METABOLISM	KEGG_NITROGEN_METABOLISM	21	-0.366679	-0.784124	0.788895	1	1	5515	tags=33%, list=18%, signal=27%	AMT/CA13/CA14/CA8/CA7/GLS2
KEGG_PYRIMIDINE_METABOLISM	KEGG_PYRIMIDINE_METABOLISM	95	-0.309322	-0.861343	0.791299	1	1	8852	tags=26%, list=29%, signal=19%	TYMS/DPYS/POLR2J2/UPP2/PRIM2/POLR2I/CMPK2/POLE4/POLR2D/POLD2/NT5C/ENTPD6/POLR2E/TXNRD2/POLD1/POLR2F/NME3/DCTD/ZNRD1/CMPK1/NT5C1B/UCK2/NT5M/UPB1
KEGG_NICOTINATE_AND_NICOTINAMIDE_METABOLISM	KEGG_NICOTINATE_AND_NICOTINAMIDE_METABOLISM	23	-0.36226	-0.789776	0.791955	1	1	6787	tags=26%, list=22%, signal=20%	NMNAT3/CD38/QPRT/NT5C1B/NT5M
KEGG_ALPHA_LINOLENIC_ACID_METABOLISM	KEGG_ALPHA_LINOLENIC_ACID_METABOLISM	12	-0.402038	-0.759364	0.792002	1	1	2930	tags=33%, list=10%, signal=30%	ACOX1/PLA2G4B/PLA2G3
KEGG_PROSTATE_CANCER	KEGG_PROSTATE_CANCER	84	-0.31172	-0.853219	0.797183	1	1	5702	tags=13%, list=19%, signal=11%	AKT1/BRAF/IKBKG/PIK3R2/TCF7L2/RB1/TGFA/PIK3CG/CREB1/KLK3
KEGG_FATTY_ACID_METABOLISM	KEGG_FATTY_ACID_METABOLISM	38	-0.335484	-0.805235	0.803851	1	1	105	tags=5%, list=0%, signal=5%	ADH4
KEGG_RENAL_CELL_CARCINOMA	KEGG_RENAL_CELL_CARCINOMA	67	-0.315728	-0.834825	0.804336	1	1	9462	tags=27%, list=31%, signal=19%	PAK4/FLCN/RBX1/ARAF/PIK3R3/GRB2/ELOB/ARNT2/HRAS/MAP2K2/RAP1A/AKT1/BRAF/PIK3R2/TGFA/PIK3CG/PAK6
KEGG_APOPTOSIS	KEGG_APOPTOSIS	77	-0.312738	-0.844806	0.811803	1	1	8129	tags=25%, list=26%, signal=18%	PRKX/NFKBIA/PRKAR2A/FADD/MYD88/IRAK2/CASP7/BIRC3/TNFRSF10A/IL3RA/ENDOG/AKT1/IKBKG/PIK3R2/FAS/IL1R1/PIK3CG/CSF2RB
KEGG_GLYOXYLATE_AND_DICARBOXYLATE_METABOLISM	KEGG_GLYOXYLATE_AND_DICARBOXYLATE_METABOLISM	14	-0.38005	-0.741637	0.831992	1	1	11645	tags=57%, list=38%, signal=36%	MDH1/MTHFD2/CS/MTHFD2L/MDH2/PGP/AFMID
KEGG_ABC_TRANSPORTERS	KEGG_ABC_TRANSPORTERS	42	-0.325641	-0.793416	0.838438	1	1	5058	tags=17%, list=16%, signal=14%	ABCA9/ABCB4/ABCC12/ABCA12/ABCC11/CFTR
KEGG_VIRAL_MYOCARDITIS	KEGG_VIRAL_MYOCARDITIS	55	-0.313877	-0.805015	0.845993	1	1	2830	tags=13%, list=9%, signal=12%	HLA-F/MYH15/HLA-DPB1/SGCA/MYH14/HLA-DMB
KEGG_GLYCOSPHINGOLIPID_BIOSYNTHESIS_LACTO_AND_NEOLACTO_SERIES	KEGG_GLYCOSPHINGOLIPID_BIOSYNTHESIS_LACTO_AND_NEOLACTO_SERIES	20	-0.349842	-0.738605	0.851477	1	1	5990	tags=40%, list=19%, signal=32%	FUT1/FUT4/ST3GAL3/GCNT2/ST3GAL6/B3GNT5/B3GNT4
KEGG_GLYCOSAMINOGLYCAN_BIOSYNTHESIS_KERATAN_SULFATE	KEGG_GLYCOSAMINOGLYCAN_BIOSYNTHESIS_KERATAN_SULFATE	14	-0.370223	-0.72246	0.857507	1	1	3132	tags=36%, list=10%, signal=32%	CHST1/B4GALT2/ST3GAL3/B3GNT7
KEGG_ALDOSTERONE_REGULATED_SODIUM_REABSORPTION	KEGG_ALDOSTERONE_REGULATED_SODIUM_REABSORPTION	35	-0.323481	-0.766829	0.864458	1	1	5824	tags=20%, list=19%, signal=16%	NR3C2/ATP1A3/HSD11B2/PIK3R2/KCNJ1/PIK3CG
KEGG_N_GLYCAN_BIOSYNTHESIS	KEGG_N_GLYCAN_BIOSYNTHESIS	46	-0.313452	-0.777565	0.87538	1	1	10432	tags=41%, list=34%, signal=27%	GANAB/MGAT1/MAN2A2/B4GALT2/ALG2/TUSC3/MGAT5B/ALG6/DPM2/MGAT4B/ALG11/DPM3/MAN1B1/ALG1/MOGS/ALG10/ST6GAL1/MGAT3
KEGG_PROPANOATE_METABOLISM	KEGG_PROPANOATE_METABOLISM	33	0.314752	0.747854	0.889473	1	1	613	tags=3%, list=2%, signal=3%	LDHAL6B
KEGG_TGF_BETA_SIGNALING_PATHWAY	KEGG_TGF_BETA_SIGNALING_PATHWAY	81	-0.29671	-0.80727	0.891759	1	1	3475	tags=6%, list=11%, signal=5%	BMP7/IFNG/INHBC/LEFTY2
KEGG_CELL_ADHESION_MOLECULES_CAMS	KEGG_CELL_ADHESION_MOLECULES_CAMS	112	-0.288972	-0.821795	0.897825	1	1	2871	tags=13%, list=9%, signal=12%	ESAM/PVR/CDH1/CDH3/CNTN2/HLA-DPB1/CLDN20/CLDN3/CLDN10/CD6/HLA-DMB/L1CAM/CLDN6/CD8A
KEGG_MAPK_SIGNALING_PATHWAY	KEGG_MAPK_SIGNALING_PATHWAY	232	-0.279073	-0.858746	0.909338	1	1	6836	tags=16%, list=22%, signal=13%	MAP4K3/MAPT/PLA2G5/TAB1/RASGRP3/RAP1A/RELB/FGF1/ARRB2/RPS6KA5/AKT1/NTF3/MAPK14/BRAF/MAPK11/IL1R2/IKBKG/ELK4/FAS/RASGRF1/MAP2K6/IL1R1/HSPA6/CACNA1I/HSPA2/JUND/PLA2G4B/MAP4K1/GADD45G/PLA2G3/CACNA1D/STK4/PTPRR/FGF18/FGFR4/PTPN5
KEGG_GLYCOLYSIS_GLUCONEOGENESIS	KEGG_GLYCOLYSIS_GLUCONEOGENESIS	53	-0.300906	-0.766022	0.909954	1	1	4097	tags=11%, list=13%, signal=10%	ALDH3A1/PGAM2/ADH1B/LDHC/ADH4
KEGG_AMINOACYL_TRNA_BIOSYNTHESIS	KEGG_AMINOACYL_TRNA_BIOSYNTHESIS	22	-0.320109	-0.691796	0.909965	1	1	11913	tags=55%, list=39%, signal=33%	SEPSECS/FARSA/RARS2/TARS2/CARS2/PSTK/YARS2/EARS2/NARS2/SARS2/LARS2
KEGG_PHOSPHATIDYLINOSITOL_SIGNALING_SYSTEM	KEGG_PHOSPHATIDYLINOSITOL_SIGNALING_SYSTEM	70	-0.292656	-0.779323	0.914813	1	1	8202	tags=26%, list=27%, signal=19%	DGKZ/CDIPT/INPP5B/PIK3C2B/INPP5E/IMPA2/PLCD3/PLCD4/SYNJ1/DGKQ/DGKG/ITPKA/PIK3R2/CALML6/DGKI/PIK3CG/DGKB
KEGG_GRAFT_VERSUS_HOST_DISEASE	KEGG_GRAFT_VERSUS_HOST_DISEASE	23	-0.317707	-0.692644	0.918206	1	1	3851	tags=22%, list=12%, signal=19%	FAS/IFNG/HLA-DPB1/HLA-DMB
KEGG_CIRCADIAN_RHYTHM_MAMMAL	KEGG_CIRCADIAN_RHYTHM_MAMMAL	12	0.339572	0.650458	0.918588	1	1	7691	tags=33%, list=25%, signal=25%	CLOCK/CRY1/PER3/PER2
KEGG_MISMATCH_REPAIR	KEGG_MISMATCH_REPAIR	23	0.313226	0.692672	0.922597	1	1	10450	tags=39%, list=34%, signal=26%	RPA4/POLD3/EXO1/PMS2/MSH2/MLH3/POLD4/RFC3/RFC5
KEGG_GLYCOSAMINOGLYCAN_BIOSYNTHESIS_CHONDROITIN_SULFATE	KEGG_GLYCOSAMINOGLYCAN_BIOSYNTHESIS_CHONDROITIN_SULFATE	22	-0.30841	-0.666511	0.929396	1	1	9133	tags=50%, list=30%, signal=35%	B3GALT6/CHST7/XYLT2/CHPF/CHST14/B4GALT7/CHST11/CHSY3/B3GAT3/B3GAT2
KEGG_TRYPTOPHAN_METABOLISM	KEGG_TRYPTOPHAN_METABOLISM	36	-0.299422	-0.711187	0.936101	1	1	1957	tags=17%, list=6%, signal=16%	MAOB/INMT/ACMSD/IL4I1/DDC
KEGG_GAP_JUNCTION	KEGG_GAP_JUNCTION	79	0.284073	0.781534	0.937899	1	1	2497	tags=5%, list=8%, signal=5%	ADRB1/TUBB8/TUBA8/TUBB1
KEGG_ETHER_LIPID_METABOLISM	KEGG_ETHER_LIPID_METABOLISM	25	-0.304442	-0.675176	0.940645	1	1	2930	tags=32%, list=10%, signal=29%	LPCAT4/PLPP1/PLPP2/PLA2G5/PAFAH1B3/PLA2G4B/PLA2G3
KEGG_GLYCOSAMINOGLYCAN_BIOSYNTHESIS_HEPARAN_SULFATE	KEGG_GLYCOSAMINOGLYCAN_BIOSYNTHESIS_HEPARAN_SULFATE	24	0.292154	0.653133	0.956387	1	1	5316	tags=17%, list=17%, signal=14%	HS3ST2/NDST1/HS3ST5/NDST3
KEGG_BIOSYNTHESIS_OF_UNSATURATED_FATTY_ACIDS	KEGG_BIOSYNTHESIS_OF_UNSATURATED_FATTY_ACIDS	22	0.294485	0.643907	0.961907	1	1	3707	tags=9%, list=12%, signal=8%	ACOT4/BAAT
KEGG_NOD_LIKE_RECEPTOR_SIGNALING_PATHWAY	KEGG_NOD_LIKE_RECEPTOR_SIGNALING_PATHWAY	57	0.277356	0.724446	0.968625	1	1	2090	tags=5%, list=7%, signal=5%	PSTPIP1/MEFV/CXCL2
KEGG_PENTOSE_PHOSPHATE_PATHWAY	KEGG_PENTOSE_PHOSPHATE_PATHWAY	21	-0.283136	-0.605471	0.971082	1	1	2430	tags=38%, list=8%, signal=35%	PGD/H6PD/RPIA/TKT/ALDOA/RBKS/RPEL1
KEGG_BLADDER_CANCER	KEGG_BLADDER_CANCER	41	-0.28021	-0.679045	0.973285	1	1	9462	tags=51%, list=31%, signal=36%	TP53/CDKN1A/MMP2/ERBB2/E2F3/CDK4/VEGFB/DAPK1/TYMP/RAF1/FGFR3/ARAF/HRAS/MAP2K2/RASSF1/RPS6KA5/BRAF/MMP1/CDH1/RB1
KEGG_GLIOMA	KEGG_GLIOMA	59	-0.272868	-0.706805	0.97492	1	1	5474	tags=15%, list=18%, signal=13%	BRAF/PIK3R2/CALML6/RB1/TGFA/CAMK2B/CAMK2A/PIK3CG
KEGG_GNRH_SIGNALING_PATHWAY	KEGG_GNRH_SIGNALING_PATHWAY	87	-0.27001	-0.742615	0.977158	1	1	8054	tags=23%, list=26%, signal=17%	PRKX/HRAS/ADCY2/ADCY7/MAP2K2/PLA2G5/ADCY6/PTK2B/ADCY5/MAPK14/MAPK11/CALML6/CAMK2B/LHB/MAP2K6/PLA2G4B/CAMK2A/PLA2G3/CACNA1D
KEGG_GLYCOSAMINOGLYCAN_DEGRADATION	KEGG_GLYCOSAMINOGLYCAN_DEGRADATION	19	-0.274613	-0.573829	0.978806	1	1	8300	tags=37%, list=27%, signal=27%	NAGLU/GUSB/HYAL2/IDUA/SGSH/HYAL1
KEGG_GALACTOSE_METABOLISM	KEGG_GALACTOSE_METABOLISM	23	-0.276028	-0.601778	0.979407	1	1	6395	tags=35%, list=21%, signal=28%	LCT/GLA/B4GALT2/GALE/AKR1B1/GALT/GALK1
KEGG_NON_HOMOLOGOUS_END_JOINING	KEGG_NON_HOMOLOGOUS_END_JOINING	12	0.276468	0.52958	0.981228	1	1	8035	tags=25%, list=26%, signal=18%	POLM/LIG4/MRE11
KEGG_B_CELL_RECEPTOR_SIGNALING_PATHWAY	KEGG_B_CELL_RECEPTOR_SIGNALING_PATHWAY	67	0.267273	0.714735	0.981265	1	1	3667	tags=7%, list=12%, signal=7%	BLNK/PLCG2/CD22/PIK3AP1/RAC2
KEGG_FC_GAMMA_R_MEDIATED_PHAGOCYTOSIS	KEGG_FC_GAMMA_R_MEDIATED_PHAGOCYTOSIS	88	-0.267539	-0.736511	0.981992	1	1	6689	tags=14%, list=22%, signal=11%	SPHK2/MYO10/PLA2G4F/AKT1/LIMK1/PIK3R2/NCF1/PLA2G4B/PIK3CG/FCGR2C/FCGR2A
KEGG_GLYCINE_SERINE_AND_THREONINE_METABOLISM	KEGG_GLYCINE_SERINE_AND_THREONINE_METABOLISM	28	0.25976	0.59752	0.986591	1	1	6500	tags=18%, list=21%, signal=14%	SDS/CHDH/BHMT/AOC3/GLYCTK
KEGG_GLYCOSYLPHOSPHATIDYLINOSITOL_GPI_ANCHOR_BIOSYNTHESIS	KEGG_GLYCOSYLPHOSPHATIDYLINOSITOL_GPI_ANCHOR_BIOSYNTHESIS	25	0.256804	0.577505	0.987907	1	1	7475	tags=16%, list=24%, signal=12%	GPLD1/PIGK/PIGH/PIGV
KEGG_TERPENOID_BACKBONE_BIOSYNTHESIS	KEGG_TERPENOID_BACKBONE_BIOSYNTHESIS	13	-0.257224	-0.494	0.988447	1	1	22893	tags=54%, list=74%, signal=14%	MVD/FDPS/PMVK/MVK/PDSS1/HMGCS1
KEGG_OTHER_GLYCAN_DEGRADATION	KEGG_OTHER_GLYCAN_DEGRADATION	14	-0.262199	-0.51166	0.988616	1	1	22740	tags=100%, list=74%, signal=26%	FUCA1/HEXA/MAN2C1/FUCA2/HEXB/ENGASE/MANBA/GLB1/MAN2B2/AGA/GBA/MAN2B1/NEU3
KEGG_CITRATE_CYCLE_TCA_CYCLE	KEGG_CITRATE_CYCLE_TCA_CYCLE	29	-0.260563	-0.595908	0.98888	1	1	1715	tags=41%, list=6%, signal=39%	SUCLG1/MDH1/FH/SDHD/DLAT/CS/PCK2/SDHC/MDH2/SDHA/SUCLG2P2
KEGG_RNA_POLYMERASE	KEGG_RNA_POLYMERASE	29	-0.258007	-0.590061	0.989456	1	1	22873	tags=100%, list=74%, signal=26%	POLR1D/POLR2J3/POLR3F/POLR3C/POLR2K/POLR3D/POLR2G/POLR2C/POLR2J3/POLR3GL/POLR2B/POLR1A/POLR3K/POLR1E/POLR1C/POLR3G/POLR3H/POLR2A/POLR2J/POLR3B/POLR2H/POLR2L/POLR1B/POLR2J2/POLR2I/POLR2D/POLR2E/POLR2F/ZNRD1
KEGG_O_GLYCAN_BIOSYNTHESIS	KEGG_O_GLYCAN_BIOSYNTHESIS	27	-0.250082	-0.564236	0.990245	1	1	3288	tags=11%, list=11%, signal=10%	GALNT9/GALNT8
KEGG_SELENOAMINO_ACID_METABOLISM	KEGG_SELENOAMINO_ACID_METABOLISM	23	0.25049	0.553936	0.991885	1	1	8704	tags=21%, list=28%, signal=15%	GGT1/METTL2B/AHCYL1/METTL6/SCLY
KEGG_PROGESTERONE_MEDIATED_OOCYTE_MATURATION	KEGG_PROGESTERONE_MEDIATED_OOCYTE_MATURATION	80	-0.25777	-0.700312	0.991919	1	1	9783	tags=39%, list=32%, signal=27%	CPEB1/MAPK10/FZR1/GNAI2/RAF1/CDC26/PLK1/ARAF/PIK3R3/ANAPC2/ANAPC7/CDK1/PRKX/ADCY2/CCNB2/ADCY7/CCNB3/CDC25B/ADCY6/CCNB1/ANAPC11/CDC25C/AKT1/ADCY5/MAPK14/BRAF/MAPK11/PIK3R2/SPDYA/PIK3CG
KEGG_THYROID_CANCER	KEGG_THYROID_CANCER	28	-0.250175	-0.568789	0.992924	1	1	8131	tags=25%, list=26%, signal=18%	HRAS/MAP2K2/TPM3/BRAF/CDH1/TCF7L2
KEGG_LIMONENE_AND_PINENE_DEGRADATION	KEGG_LIMONENE_AND_PINENE_DEGRADATION	10	-0.240221	-0.436643	0.993529	1	1	23416	tags=40%, list=76%, signal=10%	ALDH1B1/ALDH7A1/NAA80
KEGG_OOCYTE_MEIOSIS	KEGG_OOCYTE_MEIOSIS	103	-0.255706	-0.718978	0.993615	1	1	10482	tags=32%, list=34%, signal=21%	PPP2R5B/MAD2L1/PPP2R5D/BUB1/PPP2R5C/CDC23/CPEB1/CDC26/PLK1/RBX1/CCNE1/ANAPC2/CDC20/ANAPC7/PPP1CC/CDK1/PRKX/ADCY2/CCNB2/ADCY7/PPP1CA/FBXO43/ADCY6/CCNB1/ANAPC11/CDC25C/ADCY5/CALML6/CAMK2B/SPDYA/CAMK2A/SMC1B
KEGG_PRION_DISEASES	KEGG_PRION_DISEASES	28	-0.245715	-0.55865	0.994072	1	1	4055	tags=36%, list=13%, signal=31%	BAX/C8G/ELK1/PRKX/NCAM1/MAP2K2/C8B/C6/CCL5
KEGG_DNA_REPLICATION	KEGG_DNA_REPLICATION	36	0.238456	0.576668	0.995183	1	1	10450	tags=31%, list=34%, signal=20%	RPA4/POLD3/RNASEH2C/PRIM1/RNASEH2A/POLA1/POLA2/POLD4/RFC3/POLE3/RFC5
KEGG_NEUROTROPHIN_SIGNALING_PATHWAY	KEGG_NEUROTROPHIN_SIGNALING_PATHWAY	119	-0.252042	-0.722842	0.995512	1	1	9724	tags=30%, list=32%, signal=21%	MAPK10/BAX/SHC4/RAF1/PRKCD/ZNF274/PIK3R3/RPS6KA4/GRB2/MAP3K5/NGF/IRAK1/MAP3K3/HRAS/NFKBIA/FOXO3/IRAK2/MAP2K2/CSK/RAP1A/SHC2/NFKBIE/RPS6KA5/AKT1/NTF3/MAPK14/BRAF/MAPK11/PIK3R2/CALML6/CAMK2B/SH2B2/NTRK3/CAMK2A/PIK3CG
KEGG_NATURAL_KILLER_CELL_MEDIATED_CYTOTOXICITY	KEGG_NATURAL_KILLER_CELL_MEDIATED_CYTOTOXICITY	92	-0.252257	-0.699661	0.995518	1	1	5164	tags=11%, list=17%, signal=9%	BRAF/PIK3R2/RAET1E/FAS/IFNG/PTPN6/PIK3CG/LCP2/IFNA5
KEGG_ARACHIDONIC_ACID_METABOLISM	KEGG_ARACHIDONIC_ACID_METABOLISM	40	-0.243769	-0.588867	0.996738	1	1	2930	tags=22%, list=10%, signal=20%	GGT5/PLA2G5/CYP2E1/GPX1/GPX3/PLA2G4B/PLA2G3/ALOX15
KEGG_CHEMOKINE_SIGNALING_PATHWAY	KEGG_CHEMOKINE_SIGNALING_PATHWAY	159	-0.250251	-0.742597	0.997243	1	1	7970	tags=26%, list=26%, signal=20%	CCL7/HRAS/NFKBIA/ADCY2/TIAM1/CXCL13/FOXO3/ADCY7/CSK/GNG5/CXCL6/ELMO1/CXCL1/CCL28/ADCY6/FGR/RAP1A/SHC2/CCL26/PTK2B/ARRB2/AKT1/ADCY5/GNG7/BRAF/CXCL3/IKBKG/CCL20/PIK3R2/CCL3L1/CXCR4/NCF1/GNG4/CCL8/GNGT2/CCL5/PIK3CG/CX3CR1/GNG8/CCL19/CCR9
KEGG_HYPERTROPHIC_CARDIOMYOPATHY_HCM	KEGG_HYPERTROPHIC_CARDIOMYOPATHY_HCM	69	-0.24808	-0.659021	0.998308	1	1	2179	tags=14%, list=7%, signal=13%	ATP2A2/PRKAG1/TPM3/MYL3/ITGA2/ITGB6/CACNA1D/SGCA/ITGA2B
KEGG_VALINE_LEUCINE_AND_ISOLEUCINE_DEGRADATION	KEGG_VALINE_LEUCINE_AND_ISOLEUCINE_DEGRADATION	43	-0.235205	-0.576345	0.99847	1	1	9529	tags=21%, list=31%, signal=14%	ACADM/HIBADH/HADH/PCCB/BCAT2/ACADS/HMGCS1/IL4I1
KEGG_ERBB_SIGNALING_PATHWAY	KEGG_ERBB_SIGNALING_PATHWAY	84	-0.23868	-0.653299	0.998498	1	1	5474	tags=12%, list=18%, signal=10%	BRAF/PIK3R2/TGFA/CAMK2B/BTC/CAMK2A/NRG3/PIK3CG/PAK6
KEGG_VASCULAR_SMOOTH_MUSCLE_CONTRACTION	KEGG_VASCULAR_SMOOTH_MUSCLE_CONTRACTION	96	-0.242775	-0.677111	0.998503	1	1	3231	tags=20%, list=10%, signal=18%	PPP1R14A/ADCY2/ADCY7/PPP1CA/MAP2K2/PRKG1/PLA2G5/ADCY6/GUCY1A2/ADCY5/BRAF/CALML6/MYLK2/PLA2G4B/PLA2G3/CACNA1D/PRKCQ/ADRA1A
KEGG_P53_SIGNALING_PATHWAY	KEGG_P53_SIGNALING_PATHWAY	66	-0.233433	-0.615416	0.99868	1	1	8457	tags=21%, list=27%, signal=15%	CDK1/RCHY1/CCNB2/PMAIP1/CCNB3/GTSE1/CCNB1/SFN/IGFBP3/FAS/CHEK1/GADD45G/TP53AIP1
KEGG_PANCREATIC_CANCER	KEGG_PANCREATIC_CANCER	68	-0.23871	-0.633144	0.998685	1	1	5474	tags=10%, list=18%, signal=8%	BRAF/IKBKG/PIK3R2/RB1/TGFA/PIK3CG
KEGG_CELL_CYCLE	KEGG_CELL_CYCLE	122	-0.240059	-0.690438	0.998881	1	1	9851	tags=27%, list=32%, signal=18%	CDC23/TFDP1/CDK6/FZR1/CDC14B/CDC26/PLK1/RBX1/CCNE1/MCM7/ANAPC2/CDC20/ANAPC7/GADD45B/CDK1/WEE1/CDKN2C/E2F5/CCNB2/DBF4/CCNB3/CDC25B/CCNB1/ANAPC11/SFN/CDC25C/ORC1/CDKN2D/RB1/CHEK1/GADD45G/SMC1B
KEGG_GLYCEROPHOSPHOLIPID_METABOLISM	KEGG_GLYCEROPHOSPHOLIPID_METABOLISM	69	-0.244471	-0.649436	0.99906	1	1	3348	tags=35%, list=11%, signal=31%	PLPP1/PCYT2/PISD/AGPAT2/GPAM/PLPP2/LYPLA2/CDS2/DGKZ/CDIPT/ADPRM/PTDSS2/PEMT/AGPAT3/PLA2G5/DGKQ/GPD1L/DGKG/DGKI/PCYT1B/PLA2G4B/PLA2G3/DGKB
KEGG_DILATED_CARDIOMYOPATHY	KEGG_DILATED_CARDIOMYOPATHY	75	0.226368	0.617978	0.999578	1	1	6692	tags=17%, list=22%, signal=14%	ADRB1/IGF1/ITGB8/CACNG8/CACNA2D2/TNNC1/DAG1/ACTC1/SGCG/ITGA9/CACNB4/CACNA2D3/DMD
KEGG_NUCLEOTIDE_EXCISION_REPAIR	KEGG_NUCLEOTIDE_EXCISION_REPAIR	44	0.205304	0.515253	0.999581	1	1	10622	tags=34%, list=34%, signal=22%	RPA4/POLD3/CDK7/GTF2H2/XPA/MNAT1/CUL4B/POLD4/GTF2H3/RFC3/CUL4A/POLE3/ERCC4/RFC5/CCNH
KEGG_COLORECTAL_CANCER	KEGG_COLORECTAL_CANCER	60	-0.202215	-0.524297	0.999621	1	1	9791	tags=32%, list=32%, signal=22%	MSH3/AXIN1/MAPK10/BAX/APC2/RAF1/RALGDS/ARAF/PIK3R3/FOS/AXIN2/BIRC5/AKT1/BRAF/APC/PIK3R2/TCF7L2/PIK3CG
KEGG_CARDIAC_MUSCLE_CONTRACTION	KEGG_CARDIAC_MUSCLE_CONTRACTION	62	0.214429	0.567004	0.999789	1	1	7818	tags=19%, list=25%, signal=14%	COX6B2/CACNG8/CACNA2D2/TNNC1/ACTC1/COX7A2L/CACNB4/CACNA2D3/SLC9A6/ATP1A2/SLC9A1/TPM4
KEGG_RNA_DEGRADATION	KEGG_RNA_DEGRADATION	57	0.193973	0.506652	0.999789	1	1	12052	tags=39%, list=39%, signal=24%	CNOT8/CNOT2/PAPOLB/EXOSC3/PAPOLA/EXOSC2/CNOT4/LSM5/XRN1/CNOT6/EXOSC6/LSM8/DIS3/CNOT10/TTC37/LSM6/CNOT9/DCPS/DDX6/HSPD1/DCP1A/EDC3
KEGG_LYSINE_DEGRADATION	KEGG_LYSINE_DEGRADATION	44	0.200917	0.504242	0.99979	1	1	10869	tags=41%, list=35%, signal=27%	OGDHL/SETMAR/TMLHE/KMT5A/ALDH3A2/DLST/SETD1B/OGDH/KMT5B/SUV39H1/ALDH2/HADHA/NSD1/PLOD2/ACAT1/ACAT2/SETDB2/AASS
KEGG_ONE_CARBON_POOL_BY_FOLATE	KEGG_ONE_CARBON_POOL_BY_FOLATE	16	-0.186797	-0.375309	0.999805	1	1	10121	tags=56%, list=33%, signal=38%	GART/MTHFD2/MTHFD2L/MTHFR/SHMT2/TYMS/FTCD/AMT
KEGG_VEGF_SIGNALING_PATHWAY	KEGG_VEGF_SIGNALING_PATHWAY	64	-0.214363	-0.562557	0.999811	1	1	7152	tags=17%, list=23%, signal=13%	PLA2G5/SPHK2/SHC2/AKT1/MAPK14/MAPK11/PIK3R2/PLA2G4B/PLA2G3/PIK3CG

## Sheet: SDF-1+EX-4 vs NC
ID	Description	setSize	enrichmentScore	NES	pvalue	p.adjust	qvalues	rank	leading_edge	core_enrichment
KEGG_GLYCOSAMINOGLYCAN_BIOSYNTHESIS_CHONDROITIN_SULFATE	KEGG_GLYCOSAMINOGLYCAN_BIOSYNTHESIS_CHONDROITIN_SULFATE	21	-0.790163	-1.68521	0.00370515	0.681747	0.681747	1232	tags=24%, list=4%, signal=23%	CHST11/CHST14/B3GAT2/CHST13
KEGG_PANTOTHENATE_AND_COA_BIOSYNTHESIS	KEGG_PANTOTHENATE_AND_COA_BIOSYNTHESIS	15	-0.785843	-1.55807	0.0150332	1	1	832	tags=27%, list=3%, signal=26%	PANK1/DPYS/UPB1
KEGG_BETA_ALANINE_METABOLISM	KEGG_BETA_ALANINE_METABOLISM	21	-0.68035	-1.45101	0.0462168	1	1	832	tags=14%, list=3%, signal=14%	DPYS/UPB1
KEGG_VASCULAR_SMOOTH_MUSCLE_CONTRACTION	KEGG_VASCULAR_SMOOTH_MUSCLE_CONTRACTION	100	-0.452356	-1.25892	0.0689462	1	1	1637	tags=9%, list=5%, signal=9%	CALML3/MRVI1/PLA2G4B/ADCY8/ADRA1A/CACNA1D/CACNA1F/MYLK2
KEGG_BASAL_TRANSCRIPTION_FACTORS	KEGG_BASAL_TRANSCRIPTION_FACTORS	34	-0.569462	-1.3386	0.0828334	1	1	38	tags=12%, list=0%, signal=12%	GTF2F2/TAF6/GTF2A1L
KEGG_LONG_TERM_DEPRESSION	KEGG_LONG_TERM_DEPRESSION	61	0.483713	1.27158	0.0869289	1	1	5281	tags=13%, list=17%, signal=11%	GRID2/RYR1/IGF1/PLA2G3/PRKCG/GUCY1B1/GNAO1/GNAZ
KEGG_MATURITY_ONSET_DIABETES_OF_THE_YOUNG	KEGG_MATURITY_ONSET_DIABETES_OF_THE_YOUNG	11	0.723692	1.35032	0.109486	1	1	1307	tags=27%, list=4%, signal=26%	MAFA/HNF4G/BHLHA15
KEGG_ARGININE_AND_PROLINE_METABOLISM	KEGG_ARGININE_AND_PROLINE_METABOLISM	49	-0.496499	-1.24344	0.125957	1	1	3430	tags=12%, list=11%, signal=11%	CKM/CKMT1B/ARG1/CKMT1A/NOS2
KEGG_PHENYLALANINE_METABOLISM	KEGG_PHENYLALANINE_METABOLISM	16	-0.645157	-1.29845	0.137002	1	1	5884	tags=38%, list=19%, signal=30%	NAA80/ALDH3A1/DDC/HPD/TAT
KEGG_PROXIMAL_TUBULE_BICARBONATE_RECLAMATION	KEGG_PROXIMAL_TUBULE_BICARBONATE_RECLAMATION	19	-0.619025	-1.29381	0.137711	1	1	6146	tags=32%, list=20%, signal=25%	AQP1/ATP1A2/GLS2/ATP1A3/ATP1B2
KEGG_NOTCH_SIGNALING_PATHWAY	KEGG_NOTCH_SIGNALING_PATHWAY	45	0.488728	1.22289	0.15196	1	1	6252	tags=18%, list=20%, signal=14%	DLL3/RBPJL/NOTCH4/DTX4/DLL1/DTX1/LFNG/RFNG
KEGG_PYRUVATE_METABOLISM	KEGG_PYRUVATE_METABOLISM	37	0.500231	1.20853	0.169815	1	1	1454	tags=5%, list=5%, signal=5%	LDHAL6A/LDHAL6B
KEGG_REGULATION_OF_AUTOPHAGY	KEGG_REGULATION_OF_AUTOPHAGY	21	-0.584738	-1.2471	0.170047	1	1	2926	tags=10%, list=10%, signal=9%	IFNA5
KEGG_FATTY_ACID_METABOLISM	KEGG_FATTY_ACID_METABOLISM	37	0.498139	1.20348	0.174798	1	1	97	tags=3%, list=0%, signal=3%	ACADL
KEGG_ARRHYTHMOGENIC_RIGHT_VENTRICULAR_CARDIOMYOPATHY_ARVC	KEGG_ARRHYTHMOGENIC_RIGHT_VENTRICULAR_CARDIOMYOPATHY_ARVC	68	-0.441301	-1.16547	0.180436	1	1	4028	tags=13%, list=13%, signal=12%	PKP2/CACNG8/ITGB4/ITGA2B/DSC2/ACTN3/CACNA1D/CACNA1F
KEGG_ECM_RECEPTOR_INTERACTION	KEGG_ECM_RECEPTOR_INTERACTION	81	-0.428703	-1.15815	0.183735	1	1	4028	tags=10%, list=13%, signal=9%	ITGB4/ITGA2B/THBS4/TNXB/RELN/GP5/COL6A6
KEGG_GLYOXYLATE_AND_DICARBOXYLATE_METABOLISM	KEGG_GLYOXYLATE_AND_DICARBOXYLATE_METABOLISM	15	-0.627144	-1.24342	0.187427	1	1	560	tags=20%, list=2%, signal=20%	AFMID/HAO1
KEGG_GNRH_SIGNALING_PATHWAY	KEGG_GNRH_SIGNALING_PATHWAY	89	-0.417749	-1.14579	0.188341	1	1	8237	tags=28%, list=27%, signal=21%	PLCB2/MAPK8/PLCB1/HRAS/PTK2B/PLA2G5/ADCY7/PLCB4/CAMK2D/MAP2K6/MAP2K2/PRKX/ADCY5/HBEGF/MAPK14/ADCY1/CALML3/CAMK2B/LHB/CAMK2A/PLA2G4B/ADCY8/CACNA1D/CACNA1F
KEGG_CARDIAC_MUSCLE_CONTRACTION	KEGG_CARDIAC_MUSCLE_CONTRACTION	62	-0.439386	-1.14522	0.208712	1	1	5060	tags=18%, list=17%, signal=15%	UQCRHL/MYL3/ATP1A2/CACNG8/SLC9A6/ATP1A3/ATP1B2/CACNA1D/COX8C/CACNA1F
KEGG_LONG_TERM_POTENTIATION	KEGG_LONG_TERM_POTENTIATION	64	-0.435803	-1.14214	0.211002	1	1	9227	tags=33%, list=30%, signal=23%	PPP3CC/RAP1A/ARAF/RPS6KA6/PLCB2/PLCB1/HRAS/PPP1CC/PLCB4/CAMK2D/MAP2K2/PRKX/CAMK4/ADCY1/CALML3/CAMK2B/GRIN2C/CAMK2A/GRIN2A/ADCY8
KEGG_ONE_CARBON_POOL_BY_FOLATE	KEGG_ONE_CARBON_POOL_BY_FOLATE	17	0.579763	1.19695	0.225148	1	1	849	tags=6%, list=3%, signal=6%	ALDH1L1
KEGG_GLYCINE_SERINE_AND_THREONINE_METABOLISM	KEGG_GLYCINE_SERINE_AND_THREONINE_METABOLISM	27	0.509285	1.16368	0.234811	1	1	9144	tags=52%, list=30%, signal=36%	SDS/GATM/PIPOX/CHDH/GLYCTK/AOC3/PHGDH/SHMT1/SARDH/ALAS1/GNMT/AMT/MAOB/AOC2
KEGG_VIRAL_MYOCARDITIS	KEGG_VIRAL_MYOCARDITIS	51	0.442928	1.13314	0.235726	1	1	9026	tags=31%, list=29%, signal=22%	HLA-DOA/MYH14/MYH7B/MYH3/HLA-DMB/RAC2/DAG1/HLA-DPA1/DMD/HLA-DMA/BID/CASP9/HLA-F/RAC3/CAV1/HLA-C
KEGG_PROPANOATE_METABOLISM	KEGG_PROPANOATE_METABOLISM	33	0.486209	1.15111	0.240538	1	1	1454	tags=6%, list=5%, signal=6%	LDHAL6A/LDHAL6B
KEGG_PYRIMIDINE_METABOLISM	KEGG_PYRIMIDINE_METABOLISM	95	-0.401113	-1.10888	0.241836	1	1	9572	tags=28%, list=31%, signal=19%	DCK/NT5C1B/UCK2/NT5C/POLD2/TK1/AK3/POLR3G/POLD1/UMPS/POLR2I/CMPK1/TXNRD2/TYMS/POLE4/POLR2F/DCTD/NME3/ZNRD1/CMPK2/NME1-NME2/UPP2/NT5M/CANT1/DPYS/UPB1
KEGG_METABOLISM_OF_XENOBIOTICS_BY_CYTOCHROME_P450	KEGG_METABOLISM_OF_XENOBIOTICS_BY_CYTOCHROME_P450	43	-0.448975	-1.10082	0.289337	1	1	6627	tags=28%, list=22%, signal=22%	ADH1B/AKR1C1/ALDH3A1/UGT2B11/CYP2S1/CYP2C8/GSTA1/GSTA2/UGT2B17/DHDH/CYP3A7
KEGG_GALACTOSE_METABOLISM	KEGG_GALACTOSE_METABOLISM	23	-0.511867	-1.11446	0.304584	1	1	7836	tags=22%, list=26%, signal=16%	AKR1B1/GCK/MGAM/LCT
KEGG_CYSTEINE_AND_METHIONINE_METABOLISM	KEGG_CYSTEINE_AND_METHIONINE_METABOLISM	32	0.46393	1.09104	0.317608	1	1	1454	tags=9%, list=5%, signal=9%	LDHAL6A/SDS/LDHAL6B
KEGG_RIBOFLAVIN_METABOLISM	KEGG_RIBOFLAVIN_METABOLISM	15	0.554107	1.11116	0.332377	1	1	5786	tags=20%, list=19%, signal=16%	ACP4/MTMR7/ACP5
KEGG_INTESTINAL_IMMUNE_NETWORK_FOR_IGA_PRODUCTION	KEGG_INTESTINAL_IMMUNE_NETWORK_FOR_IGA_PRODUCTION	31	0.459578	1.07465	0.337116	1	1	4900	tags=23%, list=16%, signal=19%	HLA-DOA/TNFRSF17/IL5/CCL27/TNFSF13B/HLA-DMB/ITGB7
KEGG_GLYCOLYSIS_GLUCONEOGENESIS	KEGG_GLYCOLYSIS_GLUCONEOGENESIS	52	0.412158	1.05771	0.337883	1	1	1454	tags=6%, list=5%, signal=6%	LDHAL6A/FBP2/LDHAL6B
KEGG_CELL_CYCLE	KEGG_CELL_CYCLE	122	-0.36451	-1.04127	0.348166	1	1	10372	tags=45%, list=34%, signal=30%	GSK3B/ORC2/SMAD4/MCM2/SMAD2/ANAPC13/MAD1L1/E2F3/CCNA1/PKMYT1/ANAPC2/ORC5/PCNA/CDKN2C/RAD21/CDC26/CDC23/MCM3/MCM7/YWHAE/ANAPC10/MDM2/CCNA2/BUB1/PLK1/SFN/CCNE1/CDC14B/PTTG1/CDC25B/ANAPC11/ORC6/MAD2L1/BUB1B/CCNB1/CCNB2/CDKN2D/CDC6/ORC1/CDC14A/TTK/CDK1/E2F5/CDC45/CDC25C/WEE1/RB1/YWHAB/DBF4/CDC20/SMC1B/CCNB3/CHEK1/GADD45G
KEGG_TYROSINE_METABOLISM	KEGG_TYROSINE_METABOLISM	34	-0.452616	-1.06394	0.351848	1	1	3142	tags=41%, list=10%, signal=37%	ADH5/COMT/ALDH1A3/HEMK1/ADH1B/NAA80/ALDH3A1/DCT/DDC/TYRP1/HPD/HGD/TAT
KEGG_STEROID_HORMONE_BIOSYNTHESIS	KEGG_STEROID_HORMONE_BIOSYNTHESIS	32	-0.455316	-1.06097	0.356355	1	1	1950	tags=25%, list=6%, signal=23%	CYP7A1/AKR1C1/HSD17B6/UGT2B11/UGT2B17/CYP3A7/CYP17A1
KEGG_LINOLEIC_ACID_METABOLISM	KEGG_LINOLEIC_ACID_METABOLISM	19	-0.51326	-1.07275	0.36471	1	1	2880	tags=26%, list=9%, signal=24%	CYP2E1/CYP2C8/PLA2G4B/CYP3A7
KEGG_FC_GAMMA_R_MEDIATED_PHAGOCYTOSIS	KEGG_FC_GAMMA_R_MEDIATED_PHAGOCYTOSIS	88	-0.378229	-1.03555	0.37991	1	1	2290	tags=8%, list=7%, signal=7%	WAS/PIP5K1B/PTPRC/PLA2G4B/FCGR2C/PLCG2
KEGG_NEUROACTIVE_LIGAND_RECEPTOR_INTERACTION	KEGG_NEUROACTIVE_LIGAND_RECEPTOR_INTERACTION	189	0.329161	1.00008	0.435193	1	1	5458	tags=23%, list=18%, signal=19%	GABRB1/CNR1/GRID2/P2RX5/GLRA3/GRM2/CHRNA2/GPR83/PTAFR/DRD2/S1PR5/CYSLTR2/GABRB2/GABRQ/GLP2R/HCRTR1/CCKBR/GPR35/VIPR1/GNRHR/GABRA4/CHRM4/ADORA1/C3AR1/C5AR1/CHRM5/ADRA1D/CHRM3/P2RX7/THRB/GABRA3/P2RY2/GRIN2B/PTGER3/CHRM2/ADORA2A/GRIK1/CRHR2/P2RX6/HTR2A/EDNRB/ADRA2B/CHRNB2/MC4R
KEGG_PROSTATE_CANCER	KEGG_PROSTATE_CANCER	87	0.361412	1.00214	0.435349	1	1	8184	tags=22%, list=27%, signal=16%	PIK3CG/TGFA/IGF1/CREB3L3/PDGFB/EGF/CREB3L2/BCL2/CREB5/RELA/AR/E2F2/SOS1/PIK3CD/CCNE2/HSP90AA1/FGFR2/CASP9/IGF1R
KEGG_MELANOMA	KEGG_MELANOMA	63	0.379415	1.00212	0.435799	1	1	2193	tags=8%, list=7%, signal=7%	FGF9/PIK3CG/IGF1/FGF20/PDGFB
KEGG_LYSOSOME	KEGG_LYSOSOME	118	0.347198	1.00116	0.441056	1	1	10870	tags=38%, list=35%, signal=25%	DNASE2B/ATP6V0D2/LAMP3/SLC11A1/NEU1/HYAL1/AP1M2/ATP6V0A1/IDS/ACP5/ATP6V0D1/CTSH/LAMP1/GAA/AP3B2/AP3S2/GGA3/CTSB/CLTCL1/CTSS/PLA2G15/FUCA1/GGA1/LGMN/NAGPA/AP3S1/AP4M1/ABCB9/CTNS/CTSD/ASAH1/ATP6V1H/CLTB/PPT2/CTSZ/AP1S1/IGF2R/MAN2B1/NAGA/AP4S1/HEXA/GBA/HGSNAT/HEXB/GALC
KEGG_HEDGEHOG_SIGNALING_PATHWAY	KEGG_HEDGEHOG_SIGNALING_PATHWAY	46	-0.403424	-1.0019	0.446292	1	1	5255	tags=20%, list=17%, signal=16%	CSNK1E/PTCH1/GLI1/WNT16/CSNK1A1L/BMP5/IHH/WNT4
KEGG_CALCIUM_SIGNALING_PATHWAY	KEGG_CALCIUM_SIGNALING_PATHWAY	155	-0.338912	-0.994134	0.462338	1	1	2575	tags=10%, list=8%, signal=9%	DRD1/CAMK2A/PTGER1/GRIN2A/ADCY8/ADRA1A/HTR6/PLN/CACNA1D/PLCG2/CACNA1F/NOS2/GRPR/MYLK2
KEGG_ABC_TRANSPORTERS	KEGG_ABC_TRANSPORTERS	42	0.395041	0.977598	0.478306	1	1	3206	tags=12%, list=10%, signal=11%	ABCG8/ABCG1/ABCB5/ABCB1/ABCA4
KEGG_GLYCOSPHINGOLIPID_BIOSYNTHESIS_GLOBO_SERIES	KEGG_GLYCOSPHINGOLIPID_BIOSYNTHESIS_GLOBO_SERIES	12	0.523531	0.996336	0.48075	1	1	5801	tags=33%, list=19%, signal=27%	FUT1/FUT2/GBGT1/ST3GAL1
KEGG_GRAFT_VERSUS_HOST_DISEASE	KEGG_GRAFT_VERSUS_HOST_DISEASE	19	0.465151	0.981707	0.482744	1	1	8155	tags=42%, list=27%, signal=31%	HLA-DOA/IFNG/HLA-DMB/KLRD1/HLA-DPA1/IL6/HLA-DMA/HLA-F
KEGG_SULFUR_METABOLISM	KEGG_SULFUR_METABOLISM	12	-0.527822	-0.994378	0.485372	1	1	3126	tags=50%, list=10%, signal=45%	SULT1A1/BPNT1/SUOX/SULT1A2/CHST13
KEGG_GLYCOSAMINOGLYCAN_BIOSYNTHESIS_HEPARAN_SULFATE	KEGG_GLYCOSAMINOGLYCAN_BIOSYNTHESIS_HEPARAN_SULFATE	23	-0.441208	-0.960615	0.516511	1	1	5372	tags=17%, list=18%, signal=14%	HS6ST2/HS3ST5/B3GAT2
KEGG_ALLOGRAFT_REJECTION	KEGG_ALLOGRAFT_REJECTION	21	0.442086	0.955352	0.525441	1	1	4618	tags=24%, list=15%, signal=20%	HLA-DOA/IL5/IFNG/IL12A/HLA-DMB
KEGG_PATHOGENIC_ESCHERICHIA_COLI_INFECTION	KEGG_PATHOGENIC_ESCHERICHIA_COLI_INFECTION	53	0.370665	0.954771	0.53104	1	1	3682	tags=11%, list=12%, signal=10%	TUBA8/TUBB8/TUBB1/ARPC5/TUBA1A/CLDN1
KEGG_TYPE_II_DIABETES_MELLITUS	KEGG_TYPE_II_DIABETES_MELLITUS	36	0.390837	0.938704	0.550042	1	1	2155	tags=8%, list=7%, signal=8%	MAFA/PIK3CG/PRKCZ
KEGG_ANTIGEN_PROCESSING_AND_PRESENTATION	KEGG_ANTIGEN_PROCESSING_AND_PRESENTATION	55	-0.369019	-0.942305	0.564362	1	1	5315	tags=16%, list=17%, signal=14%	HLA-DPB1/PSME3/CREB1/HSPA2/KLRC3/HSPA6/LTA/IFNA5
KEGG_GAP_JUNCTION	KEGG_GAP_JUNCTION	83	0.342294	0.943259	0.566375	1	1	5420	tags=13%, list=18%, signal=11%	TUBA8/TUBB8/TUBB1/DRD2/PDGFB/TUBA1A/PRKCG/EGF/GUCY1B1/HTR2A/TUBA3D
KEGG_TASTE_TRANSDUCTION	KEGG_TASTE_TRANSDUCTION	33	0.393053	0.930561	0.566494	1	1	3501	tags=15%, list=11%, signal=13%	TAS2R46/TAS2R50/TAS2R10/TAS1R3/TAS2R5
KEGG_PPAR_SIGNALING_PATHWAY	KEGG_PPAR_SIGNALING_PATHWAY	56	0.360029	0.935777	0.574481	1	1	996	tags=4%, list=3%, signal=3%	ACADL/AQP7
KEGG_ALANINE_ASPARTATE_AND_GLUTAMATE_METABOLISM	KEGG_ALANINE_ASPARTATE_AND_GLUTAMATE_METABOLISM	26	-0.409875	-0.913162	0.58624	1	1	11921	tags=69%, list=39%, signal=42%	GAD1/GLUD1/PPAT/GFPT1/NIT2/ASNS/CPS1/GFPT2/GLS/ALDH4A1/GOT1/GLUD2/ADSL/GPT2/GAD2/GLS2/ASPA
KEGG_RETINOL_METABOLISM	KEGG_RETINOL_METABOLISM	34	-0.390368	-0.917615	0.588349	1	1	3800	tags=21%, list=12%, signal=18%	RDH12/CYP2C8/DGAT2/UGT2B17/CYP3A7/RDH8
KEGG_OLFACTORY_TRANSDUCTION	KEGG_OLFACTORY_TRANSDUCTION	79	-0.346266	-0.932187	0.594173	1	1	3559	tags=18%, list=12%, signal=16%	CAMK2B/OR1Q1/OR5K2/OR2M4/CAMK2A/OR13A1/OR51E1/OR2AG2/OR2AG1/OR1E1/CNGB1/OR2A4/OR1L8
KEGG_LEISHMANIA_INFECTION	KEGG_LEISHMANIA_INFECTION	53	-0.365452	-0.926587	0.59744	1	1	5315	tags=19%, list=17%, signal=16%	HLA-DPB1/TLR2/MAPK14/NFKBIB/FCGR2A/IL12B/FCGR2C/NCF2/NOS2
KEGG_DILATED_CARDIOMYOPATHY	KEGG_DILATED_CARDIOMYOPATHY	76	-0.346354	-0.928008	0.600637	1	1	4446	tags=13%, list=15%, signal=11%	ITGB6/ADCY1/CACNG8/ITGB4/ITGA2B/ADCY8/PLN/CACNA1D/CACNA1F
KEGG_ASTHMA	KEGG_ASTHMA	14	0.455472	0.89689	0.610082	1	1	1955	tags=14%, list=6%, signal=13%	HLA-DOA/IL5
KEGG_PRIMARY_IMMUNODEFICIENCY	KEGG_PRIMARY_IMMUNODEFICIENCY	23	-0.412112	-0.897267	0.615579	1	1	2256	tags=17%, list=7%, signal=16%	PTPRC/ZAP70/CD79A
KEGG_T_CELL_RECEPTOR_SIGNALING_PATHWAY	KEGG_T_CELL_RECEPTOR_SIGNALING_PATHWAY	89	-0.336888	-0.924003	0.617152	1	1	3278	tags=8%, list=11%, signal=7%	NFKBIB/CTLA4/PTPRC/ZAP70/LCP2/PAK6
KEGG_FRUCTOSE_AND_MANNOSE_METABOLISM	KEGG_FRUCTOSE_AND_MANNOSE_METABOLISM	31	0.386667	0.904156	0.620796	1	1	963	tags=6%, list=3%, signal=6%	PFKFB1/FBP2
KEGG_ALZHEIMERS_DISEASE	KEGG_ALZHEIMERS_DISEASE	153	-0.318784	-0.933391	0.636245	1	1	2575	tags=22%, list=8%, signal=20%	NDUFB8/CASP7/NDUFB2/ATP5MC1/NDUFB5/NDUFB7/UQCRQ/ATP5F1D/BAD/APH1A/FADD/PLCB2/ATP5PO/PLCB1/NDUFA8/COX7A2/SDHD/COX7A1/NDUFA3/PLCB4/MAPT/RYR3/FAS/COX7C/COX6B1/UQCRHL/CALML3/GRIN2C/GRIN2A/CACNA1D/COX8C/CACNA1F
KEGG_DRUG_METABOLISM_OTHER_ENZYMES	KEGG_DRUG_METABOLISM_OTHER_ENZYMES	34	-0.379829	-0.89284	0.636927	1	1	1950	tags=15%, list=6%, signal=14%	UGT2B17/CYP3A7/DPYS/UPB1
KEGG_RNA_DEGRADATION	KEGG_RNA_DEGRADATION	57	-0.349599	-0.898121	0.656423	1	1	10908	tags=35%, list=36%, signal=23%	EXOSC2/PNPT1/TENT4A/MPHOSPH6/LSM3/EXOSC9/EXOSC7/EXOSC4/EXOSC6/LSM1/LSM7/CNOT7/EXOSC5/ENO2/PAPOLA/LSM6/CNOT8/ENO3/PAPOLB
KEGG_ALPHA_LINOLENIC_ACID_METABOLISM	KEGG_ALPHA_LINOLENIC_ACID_METABOLISM	13	-0.446183	-0.858938	0.664778	1	1	1637	tags=38%, list=5%, signal=36%	PLA2G4A/PLA2G1B/PLA2G5/PLA2G4B
KEGG_GLYCOSPHINGOLIPID_BIOSYNTHESIS_LACTO_AND_NEOLACTO_SERIES	KEGG_GLYCOSPHINGOLIPID_BIOSYNTHESIS_LACTO_AND_NEOLACTO_SERIES	19	-0.414209	-0.865729	0.664923	1	1	3614	tags=26%, list=12%, signal=23%	B3GNT5/B3GALT1/B3GNT4/GCNT2
KEGG_N_GLYCAN_BIOSYNTHESIS	KEGG_N_GLYCAN_BIOSYNTHESIS	46	0.352686	0.885966	0.669811	1	1	9651	tags=33%, list=31%, signal=22%	MGAT3/MGAT5/ALG11/MOGS/ALG12/B4GALT3/ALG3/ALG13/MGAT1/MAN2A1/DDOST/ALG10B/MGAT2/STT3A/DAD1
KEGG_MTOR_SIGNALING_PATHWAY	KEGG_MTOR_SIGNALING_PATHWAY	48	0.34948	0.885128	0.670017	1	1	1838	tags=4%, list=6%, signal=4%	PIK3CG/IGF1
KEGG_NATURAL_KILLER_CELL_MEDIATED_CYTOTOXICITY	KEGG_NATURAL_KILLER_CELL_MEDIATED_CYTOTOXICITY	93	-0.32607	-0.898474	0.691645	1	1	3988	tags=8%, list=13%, signal=7%	FCER1G/KLRC3/ZAP70/LCP2/PLCG2/IFNA5
KEGG_HEMATOPOIETIC_CELL_LINEAGE	KEGG_HEMATOPOIETIC_CELL_LINEAGE	53	-0.346498	-0.87853	0.692014	1	1	6091	tags=17%, list=20%, signal=14%	IL3RA/HLA-DRA/CSF1R/IL1R1/ITGA2B/CD7/CD19/GP5
KEGG_BLADDER_CANCER	KEGG_BLADDER_CANCER	41	-0.351575	-0.854528	0.723077	1	1	9227	tags=34%, list=30%, signal=24%	MDM2/ARAF/RASSF1/HRAS/CXCL8/PGF/RPS6KA5/DAPK3/MAP2K2/RB1/MMP1/CDH1/FGFR3
KEGG_COMPLEMENT_AND_COAGULATION_CASCADES	KEGG_COMPLEMENT_AND_COAGULATION_CASCADES	57	0.331294	0.862918	0.74113	1	1	3534	tags=14%, list=12%, signal=12%	C4BPB/F7/C8B/PROC/SERPINA5/C3AR1/C5AR1/SERPINF2
KEGG_JAK_STAT_SIGNALING_PATHWAY	KEGG_JAK_STAT_SIGNALING_PATHWAY	116	-0.312277	-0.885406	0.743705	1	1	4656	tags=11%, list=15%, signal=10%	PRL/IL26/CSF2RB/IL13RA2/IL24/IL21R/CRLF2/IL12B/IL22RA1/IL12RB1/OSM/IFNA5
KEGG_PEROXISOME	KEGG_PEROXISOME	73	-0.325124	-0.866737	0.747189	1	1	2078	tags=20%, list=7%, signal=19%	MLYCD/PEX16/EHHADH/HMGCL/EPHX2/PEX13/FAR2/DECR2/PEX26/PEX2/PEX11B/ABCD2/HAO1/NOS2
KEGG_FC_EPSILON_RI_SIGNALING_PATHWAY	KEGG_FC_EPSILON_RI_SIGNALING_PATHWAY	61	-0.329559	-0.85682	0.747819	1	1	1637	tags=15%, list=5%, signal=14%	MAP2K6/PIK3R1/MAP2K2/MAPK14/FCER1G/PLA2G4B/LCP2/PLCG2
KEGG_SNARE_INTERACTIONS_IN_VESICULAR_TRANSPORT	KEGG_SNARE_INTERACTIONS_IN_VESICULAR_TRANSPORT	38	-0.34888	-0.836848	0.751932	1	1	3184	tags=8%, list=10%, signal=7%	VAMP8/STX19
KEGG_FOCAL_ADHESION	KEGG_FOCAL_ADHESION	191	-0.298132	-0.894017	0.78056	1	1	3442	tags=5%, list=11%, signal=5%	FLT1/ITGA2B/THBS4/TNXB/RELN/ACTN3/PAK6/COL6A6/MYLK2
KEGG_TERPENOID_BACKBONE_BIOSYNTHESIS	KEGG_TERPENOID_BACKBONE_BIOSYNTHESIS	15	-0.391555	-0.776327	0.78524	1	1	7588	tags=20%, list=25%, signal=15%	HMGCS1/IDI2
KEGG_VIBRIO_CHOLERAE_INFECTION	KEGG_VIBRIO_CHOLERAE_INFECTION	51	-0.329587	-0.831281	0.786942	1	1	4099	tags=10%, list=13%, signal=9%	ARF1/CFTR/ATP6V1B1/PLCG2
KEGG_SYSTEMIC_LUPUS_ERYTHEMATOSUS	KEGG_SYSTEMIC_LUPUS_ERYTHEMATOSUS	38	-0.339434	-0.814191	0.79289	1	1	3533	tags=18%, list=12%, signal=16%	CD28/C9/FCGR2A/GRIN2A/ACTN3/FCGR2C
KEGG_ETHER_LIPID_METABOLISM	KEGG_ETHER_LIPID_METABOLISM	26	-0.358242	-0.798128	0.800429	1	1	10615	tags=50%, list=35%, signal=33%	LPCAT2/PLA2G4A/PAFAH1B3/AGPS/PLA2G1B/PLD2/LPCAT4/ENPP6/PLA2G5/PLPP1/PLPP2/PLA2G4B
KEGG_PRION_DISEASES	KEGG_PRION_DISEASES	28	-0.350347	-0.794062	0.801092	1	1	3533	tags=21%, list=12%, signal=19%	MAP2K2/PRKX/C6/C9/CCL5
KEGG_NITROGEN_METABOLISM	KEGG_NITROGEN_METABOLISM	18	0.373462	0.778718	0.806823	1	1	4401	tags=22%, list=14%, signal=19%	CA3/HAL/CA2/CA14
KEGG_DRUG_METABOLISM_CYTOCHROME_P450	KEGG_DRUG_METABOLISM_CYTOCHROME_P450	47	0.324616	0.819215	0.808248	1	1	2736	tags=11%, list=9%, signal=10%	CYP2A7/CYP2A6/CYP2D6/UGT2B15/UGT2B10
KEGG_PENTOSE_PHOSPHATE_PATHWAY	KEGG_PENTOSE_PHOSPHATE_PATHWAY	22	0.355676	0.777298	0.816742	1	1	2719	tags=9%, list=9%, signal=8%	FBP2/RPEL1
KEGG_OTHER_GLYCAN_DEGRADATION	KEGG_OTHER_GLYCAN_DEGRADATION	14	0.381612	0.751449	0.818313	1	1	12424	tags=71%, list=41%, signal=42%	NEU1/FUCA1/MAN2B1/HEXA/GBA/MAN2B2/HEXB/AGA/FUCA2/GLB1
KEGG_MAPK_SIGNALING_PATHWAY	KEGG_MAPK_SIGNALING_PATHWAY	235	-0.291209	-0.890487	0.823346	1	1	7174	tags=16%, list=23%, signal=12%	TAB1/FAS/FGF14/RASGRF1/MAP2K6/RPS6KA5/FGF12/MAP2K2/PRKX/RELB/FGF11/JUND/RRAS2/IKBKG/MAP4K1/ARRB2/DDIT3/STMN1/MAPK14/DUSP2/FGF17/HSPA2/IL1R1/STK4/CACNG8/GADD45G/FGFR4/PTPRR/RASGRP4/PLA2G4B/FGFR3/PTPN5/HSPA6/FGF18/CACNA1D/CACNA1F
KEGG_FOLATE_BIOSYNTHESIS	KEGG_FOLATE_BIOSYNTHESIS	10	0.400943	0.732526	0.826537	1	1	8520	tags=50%, list=28%, signal=36%	ALPP/FPGS/ALPL/ALPI/PTS
KEGG_PENTOSE_AND_GLUCURONATE_INTERCONVERSIONS	KEGG_PENTOSE_AND_GLUCURONATE_INTERCONVERSIONS	15	-0.371656	-0.736874	0.83893	1	1	4788	tags=40%, list=16%, signal=34%	DCXR/UGT2B11/RPE/UGT2B17/DHDH
KEGG_OOCYTE_MEIOSIS	KEGG_OOCYTE_MEIOSIS	106	-0.299362	-0.839331	0.855456	1	1	10317	tags=39%, list=34%, signal=26%	ANAPC13/PPP2CA/FBXO5/MAPK12/PKMYT1/ANAPC2/CDC26/CDC23/PPP2R5C/PPP3CC/YWHAE/ANAPC10/PPP2R5D/BUB1/PLK1/CCNE1/RPS6KA6/PTTG1/PPP2R5B/FBXO43/PPP1CC/ADCY7/ANAPC11/CAMK2D/SPDYA/MAD2L1/CCNB1/CCNB2/PRKX/ADCY5/CDK1/CDC25C/YWHAB/CDC20/SMC1B/ADCY1/CALML3/CAMK2B/CAMK2A/ADCY8
KEGG_GLYCOSYLPHOSPHATIDYLINOSITOL_GPI_ANCHOR_BIOSYNTHESIS	KEGG_GLYCOSYLPHOSPHATIDYLINOSITOL_GPI_ANCHOR_BIOSYNTHESIS	25	0.337406	0.757705	0.860945	1	1	8849	tags=28%, list=29%, signal=20%	GPLD1/PIGK/PIGV/PIGA/PIGX/PIGG/PIGH
KEGG_GLYCOSPHINGOLIPID_BIOSYNTHESIS_GANGLIO_SERIES	KEGG_GLYCOSPHINGOLIPID_BIOSYNTHESIS_GANGLIO_SERIES	14	-0.36015	-0.705069	0.871645	1	1	8980	tags=36%, list=29%, signal=25%	ST6GALNAC4/SLC33A1/ST8SIA1/ST6GALNAC3
KEGG_STEROID_BIOSYNTHESIS	KEGG_STEROID_BIOSYNTHESIS	17	0.350856	0.724358	0.872015	1	1	1554	tags=6%, list=5%, signal=6%	SOAT2
KEGG_BASE_EXCISION_REPAIR	KEGG_BASE_EXCISION_REPAIR	34	-0.319426	-0.750854	0.878266	1	1	11827	tags=71%, list=39%, signal=43%	POLE/POLD4/POLB/MPG/FEN1/LIG1/POLL/APEX2/PCNA/XRCC1/POLD2/UNG/PARP3/POLD1/NEIL2/NTHL1/HMGB1/POLE4/MUTYH/NEIL3/SMUG1/APEX1/OGG1
KEGG_AXON_GUIDANCE	KEGG_AXON_GUIDANCE	124	-0.292913	-0.837932	0.881046	1	1	4822	tags=9%, list=16%, signal=8%	RND1/EPHB1/LRRC4C/NGEF/ABLIM3/EFNB3/L1CAM/SEMA3G/NTN3/PAK6
KEGG_CYTOSOLIC_DNA_SENSING_PATHWAY	KEGG_CYTOSOLIC_DNA_SENSING_PATHWAY	39	-0.316607	-0.762505	0.882715	1	1	6329	tags=23%, list=21%, signal=18%	TREX1/IRF3/CASP1/IKBKG/AIM2/NFKBIB/CCL5/IFNA5
KEGG_GLYCOSAMINOGLYCAN_BIOSYNTHESIS_KERATAN_SULFATE	KEGG_GLYCOSAMINOGLYCAN_BIOSYNTHESIS_KERATAN_SULFATE	14	0.354506	0.698073	0.882922	1	1	7590	tags=29%, list=25%, signal=22%	ST3GAL1/B4GALT4/B3GNT7/B4GALT3
KEGG_TIGHT_JUNCTION	KEGG_TIGHT_JUNCTION	116	0.28829	0.83011	0.896154	1	1	4438	tags=13%, list=14%, signal=11%	CLDN10/CLDN6/MYH14/PRKCZ/PPP2R2B/CLDN14/CLDN11/CLDN1/PRKCQ/TJP3/MYH7B/PRKCG/MYH3/MYLPF/ACTN2
KEGG_DORSO_VENTRAL_AXIS_FORMATION	KEGG_DORSO_VENTRAL_AXIS_FORMATION	22	0.330171	0.721558	0.89675	1	1	7427	tags=18%, list=24%, signal=14%	NOTCH4/ETV7/SOS1/ETS2
KEGG_INOSITOL_PHOSPHATE_METABOLISM	KEGG_INOSITOL_PHOSPHATE_METABOLISM	52	-0.306477	-0.774998	0.896947	1	1	8233	tags=23%, list=27%, signal=17%	PLCB1/IMPA1/INPP5E/PLCB4/ITPKB/PI4KB/ITPKA/MIOX/SYNJ1/PIP5K1B/PLCG2
KEGG_ADHERENS_JUNCTION	KEGG_ADHERENS_JUNCTION	73	-0.297133	-0.792116	0.897676	1	1	2200	tags=37%, list=7%, signal=34%	ACTB/NECTIN1/FYN/MAPK1/SMAD4/SMAD2/NECTIN2/BAIAP2/SORBS1/TCF7L2/CTNNA3/NLK/WASL/WASF1/SRC/VCL/TGFBR1/YES1/SNAI2/SNAI1/PTPRJ/CTNNA2/CDH1/NECTIN4/WAS/ACTN3
KEGG_BASAL_CELL_CARCINOMA	KEGG_BASAL_CELL_CARCINOMA	48	-0.306102	-0.764661	0.898393	1	1	5255	tags=27%, list=17%, signal=22%	BMP2/FZD7/PTCH2/FZD8/WNT7B/WNT9A/PTCH1/APC/GLI1/WNT16/FZD9/WNT4
KEGG_NON_HOMOLOGOUS_END_JOINING	KEGG_NON_HOMOLOGOUS_END_JOINING	12	0.353794	0.673308	0.900998	1	1	19804	tags=100%, list=65%, signal=35%	POLM/RAD50/XRCC4/MRE11/LIG4/NHEJ1/XRCC5/PRKDC/DCLRE1C/FEN1/XRCC6/POLL
KEGG_O_GLYCAN_BIOSYNTHESIS	KEGG_O_GLYCAN_BIOSYNTHESIS	26	-0.324365	-0.722655	0.905866	1	1	2392	tags=35%, list=8%, signal=32%	ST3GAL2/GALNTL6/GALNT12/GCNT4/GALNT4/GALNT18/GCNT3/GALNT13
KEGG_EPITHELIAL_CELL_SIGNALING_IN_HELICOBACTER_PYLORI_INFECTION	KEGG_EPITHELIAL_CELL_SIGNALING_IN_HELICOBACTER_PYLORI_INFECTION	65	-0.29688	-0.780023	0.909108	1	1	8127	tags=22%, list=27%, signal=16%	ATP6V0C/CXCL8/ATP6V1D/NFKBIA/JAM3/CSK/IKBKG/HBEGF/MAPK14/ATP6V1C2/ATP6V1B1/CCL5/PLCG2
KEGG_ASCORBATE_AND_ALDARATE_METABOLISM	KEGG_ASCORBATE_AND_ALDARATE_METABOLISM	12	0.346114	0.658692	0.913628	1	1	2736	tags=17%, list=9%, signal=15%	UGT2B15/UGT2B10
KEGG_AUTOIMMUNE_THYROID_DISEASE	KEGG_AUTOIMMUNE_THYROID_DISEASE	23	-0.320231	-0.697219	0.918609	1	1	5315	tags=26%, list=17%, signal=22%	HLA-DPB1/TSHR/CD28/CTLA4/IFNA5
KEGG_PORPHYRIN_AND_CHLOROPHYLL_METABOLISM	KEGG_PORPHYRIN_AND_CHLOROPHYLL_METABOLISM	25	0.315995	0.709621	0.919125	1	1	3326	tags=12%, list=11%, signal=11%	UGT2B15/UGT2B10/CP
KEGG_CELL_ADHESION_MOLECULES_CAMS	KEGG_CELL_ADHESION_MOLECULES_CAMS	103	0.284992	0.807685	0.921919	1	1	5539	tags=17%, list=18%, signal=14%	CADM3/HLA-DOA/CLDN10/CD226/CLDN6/ITGB8/CLDN14/CLDN11/SIGLEC1/CLDN1/ITGA9/CD276/HLA-DMB/ITGB7/NRCAM/ICAM2/CNTN1
KEGG_NOD_LIKE_RECEPTOR_SIGNALING_PATHWAY	KEGG_NOD_LIKE_RECEPTOR_SIGNALING_PATHWAY	58	0.290459	0.758738	0.936475	1	1	2428	tags=5%, list=8%, signal=5%	PSTPIP1/NLRP3/MEFV
KEGG_LEUKOCYTE_TRANSENDOTHELIAL_MIGRATION	KEGG_LEUKOCYTE_TRANSENDOTHELIAL_MIGRATION	101	0.279675	0.790837	0.943559	1	1	4692	tags=13%, list=15%, signal=11%	CLDN10/NCF1/CLDN6/PIK3CG/NOX1/CLDN14/CLDN11/CLDN1/PRKCG/VAV2/MYLPF/ACTN2/NOX3
KEGG_HOMOLOGOUS_RECOMBINATION	KEGG_HOMOLOGOUS_RECOMBINATION	28	0.298893	0.68806	0.94522	1	1	1313	tags=4%, list=4%, signal=3%	RAD54B
KEGG_MELANOGENESIS	KEGG_MELANOGENESIS	91	-0.280965	-0.773101	0.948498	1	1	8331	tags=31%, list=27%, signal=22%	PLCB2/KITLG/PLCB1/HRAS/FZD5/FZD7/ADCY7/FZD8/PLCB4/CAMK2D/WNT7B/MAP2K2/PRKX/ADCY5/WNT9A/DCT/POMC/CREB1/ADCY1/WNT16/CALML3/CAMK2B/TYRP1/CAMK2A/FZD9/ADCY8/WNT4
KEGG_CYTOKINE_CYTOKINE_RECEPTOR_INTERACTION	KEGG_CYTOKINE_CYTOKINE_RECEPTOR_INTERACTION	190	0.274965	0.836616	0.949234	1	1	4569	tags=14%, list=15%, signal=12%	PF4/PF4V1/CXCL10/TNFRSF17/LTB/MPL/CXCR6/CXCL11/KDR/IL23A/IL5/PDGFB/AMH/CCL27/BMP7/IL2RB/INHBE/TNFSF13B/CCL4L2/IFNG/TNFRSF25/TSLP/CXCL3/CXCL14/CCL24/EGF/IL12A
KEGG_BIOSYNTHESIS_OF_UNSATURATED_FATTY_ACIDS	KEGG_BIOSYNTHESIS_OF_UNSATURATED_FATTY_ACIDS	21	0.295588	0.638768	0.961428	1	1	11034	tags=52%, list=36%, signal=34%	ACOT4/ACOT1/SCD5/FADS2/HACD1/ACOT2/ACOX1/SCD/PECR/ELOVL6/HADHA
KEGG_ALDOSTERONE_REGULATED_SODIUM_REABSORPTION	KEGG_ALDOSTERONE_REGULATED_SODIUM_REABSORPTION	34	-0.28457	-0.66892	0.964389	1	1	7220	tags=26%, list=24%, signal=20%	PIK3R2/PIK3R1/HSD11B2/NR3C2/SCNN1A/ATP1A2/ATP1A3/ATP1B2
KEGG_CHEMOKINE_SIGNALING_PATHWAY	KEGG_CHEMOKINE_SIGNALING_PATHWAY	156	0.271593	0.809007	0.964487	1	1	1483	tags=4%, list=5%, signal=4%	PF4/PF4V1/CXCL10/NCF1/CXCR6/PIK3CG/CXCL11
KEGG_TYPE_I_DIABETES_MELLITUS	KEGG_TYPE_I_DIABETES_MELLITUS	26	0.287487	0.651254	0.969821	1	1	4714	tags=19%, list=15%, signal=16%	HLA-DOA/IFNG/IL12A/HLA-DMB/ICA1
KEGG_WNT_SIGNALING_PATHWAY	KEGG_WNT_SIGNALING_PATHWAY	139	-0.269743	-0.782066	0.974655	1	1	8815	tags=24%, list=29%, signal=18%	NKD1/MAPK10/SFRP2/PLCB2/VANGL2/PPP2R5B/ROCK2/NFATC3/MAPK8/PLCB1/CTBP1/FZD5/FZD7/CTBP2/FZD8/PLCB4/CAMK2D/TBL1XR1/WNT7B/DKK2/PRKX/FOSL1/WNT9A/CSNK1E/APC/WNT16/CAMK2B/MMP7/SFRP5/CAMK2A/FZD9/CSNK1A1L/WNT4
KEGG_PRIMARY_BILE_ACID_BIOSYNTHESIS	KEGG_PRIMARY_BILE_ACID_BIOSYNTHESIS	12	-0.287755	-0.542109	0.978009	1	1	7511	tags=33%, list=25%, signal=25%	SLC27A5/CYP7A1/CYP46A1
KEGG_RENIN_ANGIOTENSIN_SYSTEM	KEGG_RENIN_ANGIOTENSIN_SYSTEM	12	-0.287275	-0.541205	0.978009	1	1	4048	tags=25%, list=13%, signal=22%	THOP1/CPA3
KEGG_GLIOMA	KEGG_GLIOMA	62	0.266708	0.702897	0.982211	1	1	2193	tags=6%, list=7%, signal=6%	PIK3CG/TGFA/IGF1/PDGFB
KEGG_LIMONENE_AND_PINENE_DEGRADATION	KEGG_LIMONENE_AND_PINENE_DEGRADATION	10	-0.262618	-0.476778	0.985807	1	1	22597	tags=30%, list=74%, signal=8%	EHHADH/NAA80
KEGG_GLYCOSAMINOGLYCAN_DEGRADATION	KEGG_GLYCOSAMINOGLYCAN_DEGRADATION	19	-0.253559	-0.529958	0.989347	1	1	8642	tags=32%, list=28%, signal=23%	SGSH/HYAL2/IDUA/HPSE2/HPSE
KEGG_PANCREATIC_CANCER	KEGG_PANCREATIC_CANCER	68	0.259711	0.693786	0.99059	1	1	8830	tags=18%, list=29%, signal=13%	PIK3CG/TGFA/EGF/RAC2/VEGFD/RELA/E2F2/CDKN2A/PIK3CD/CASP9/RAC3/E2F1
KEGG_AMYOTROPHIC_LATERAL_SCLEROSIS_ALS	KEGG_AMYOTROPHIC_LATERAL_SCLEROSIS_ALS	47	-0.258307	-0.643431	0.990622	1	1	10038	tags=40%, list=33%, signal=27%	PRPH2/MAPK13/CAT/CCS/MAP3K5/ALS2/SLC1A2/PPP3CC/BAD/DAXX/DERL1/NEFL/RAB5A/MAP2K6/CASP1/MAPK14/GRIN2C/GRIN2A
KEGG_NEUROTROPHIN_SIGNALING_PATHWAY	KEGG_NEUROTROPHIN_SIGNALING_PATHWAY	119	-0.258727	-0.736545	0.99142	1	1	9674	tags=31%, list=32%, signal=21%	RPS6KA4/MAP3K5/TRAF6/IRAK3/SHC2/BRAF/YWHAE/RAP1A/NTF3/MAP3K1/IRAK2/MAPK10/RPS6KA6/BAD/MAPK8/HRAS/SHC4/NFKBIA/NFKBIE/RIPK2/CAMK2D/PIK3R2/CSK/RPS6KA5/PIK3R1/SORT1/MAP2K2/CAMK4/YWHAB/MAPK14/NTRK3/CALML3/CAMK2B/NFKBIB/CAMK2A/PLCG2
KEGG_HYPERTROPHIC_CARDIOMYOPATHY_HCM	KEGG_HYPERTROPHIC_CARDIOMYOPATHY_HCM	70	-0.25665	-0.679805	0.99246	1	1	4446	tags=10%, list=15%, signal=9%	ITGB6/CACNG8/ITGB4/ITGA2B/CACNA1D/CACNA1F
KEGG_RIBOSOME	KEGG_RIBOSOME	88	0.256312	0.711268	0.992483	1	1	726	tags=1%, list=2%, signal=1%	RPL3L
KEGG_CITRATE_CYCLE_TCA_CYCLE	KEGG_CITRATE_CYCLE_TCA_CYCLE	28	0.249608	0.574604	0.99364	1	1	22999	tags=100%, list=75%, signal=25%	SUCLG2P2/DLST/ACO2/IDH3A/PDHA1/SUCLG2/OGDH/CS/IDH2/SDHB/IDH3G/MDH1/FH/SDHC/ACLY/MDH2/IDH3B/ACO1/DLD/DLAT/PDHB/PC/SUCLA2/PCK2/SDHA/IDH1/SUCLG1/SDHD
KEGG_TRYPTOPHAN_METABOLISM	KEGG_TRYPTOPHAN_METABOLISM	31	0.245529	0.574128	0.994223	1	1	4590	tags=10%, list=15%, signal=8%	IDO2/TDO2/KMO
KEGG_AMINOACYL_TRNA_BIOSYNTHESIS	KEGG_AMINOACYL_TRNA_BIOSYNTHESIS	22	-0.244203	-0.526746	0.994358	1	1	23164	tags=100%, list=76%, signal=24%	MARS2/FARS2/EARS2/WARS2/AARS2/PARS2/NARS2/FARSB/SEPSECS/HARS2/DARS2/FARSA/TARS2/VARS2/IARS2/MTFMT/RARS2/CARS2/LARS2/YARS2/PSTK
KEGG_LYSINE_DEGRADATION	KEGG_LYSINE_DEGRADATION	43	0.246707	0.612434	0.99458	1	1	8964	tags=30%, list=29%, signal=21%	PIPOX/BBOX1/SETMAR/DLST/GCDH/TMLHE/KMT5B/ALDH2/ACAT2/KMT5C/ALDH3A2/SETD1B/NSD3
KEGG_INSULIN_SIGNALING_PATHWAY	KEGG_INSULIN_SIGNALING_PATHWAY	123	0.253878	0.735124	0.994829	1	1	7872	tags=15%, list=26%, signal=11%	FBP2/PIK3CG/PRKCZ/EXOC7/PRKAG3/PYGM/RHOQ/PPARGC1A/PDE3A/RAPGEF1/PDE3B/SH2B2/SOS1/ACACB/PPP1R3D/PTPRF/PIK3CD/PPP1CA
KEGG_B_CELL_RECEPTOR_SIGNALING_PATHWAY	KEGG_B_CELL_RECEPTOR_SIGNALING_PATHWAY	64	-0.25128	-0.658548	0.995479	1	1	3276	tags=28%, list=11%, signal=25%	CD81/NFATC3/HRAS/BCL10/RASGRP3/NFKBIA/NFKBIE/PIK3R2/PIK3R1/PIK3AP1/MAP2K2/IKBKG/LILRB3/NFKBIB/CD19/CD79A/PLCG2
KEGG_PHOSPHATIDYLINOSITOL_SIGNALING_SYSTEM	KEGG_PHOSPHATIDYLINOSITOL_SIGNALING_SYSTEM	71	-0.250175	-0.663707	0.995844	1	1	8233	tags=23%, list=27%, signal=17%	PLCB2/PLCB1/IMPA1/INPP5E/PLCB4/PIK3R2/PIK3R1/ITPKB/PI4KB/ITPKA/SYNJ1/CALML3/CDS1/PIP5K1B/PLCG2
KEGG_HISTIDINE_METABOLISM	KEGG_HISTIDINE_METABOLISM	24	-0.241411	-0.530229	0.995921	1	1	7306	tags=25%, list=24%, signal=19%	HEMK1/FTCD/ALDH3A1/DDC/ASPA
KEGG_STARCH_AND_SUCROSE_METABOLISM	KEGG_STARCH_AND_SUCROSE_METABOLISM	33	-0.246607	-0.576615	0.995936	1	1	5244	tags=12%, list=17%, signal=10%	UGT2B11/MGAM/UGT2B17
KEGG_BUTANOATE_METABOLISM	KEGG_BUTANOATE_METABOLISM	31	0.235442	0.550543	0.996286	1	1	8810	tags=29%, list=29%, signal=21%	ACSM3/ACSM4/ABAT/OXCT2/OXCT1/ALDH2/ACAT2/ALDH3A2/AKR1B10
KEGG_PROTEIN_EXPORT	KEGG_PROTEIN_EXPORT	24	0.231136	0.51463	0.996498	1	1	12298	tags=54%, list=40%, signal=32%	IMMP2L/SEC61A2/SEC61A1/SRP72/SEC61B/HSPA5/SEC62/IMMP1L/SRP9P1/SEC11A/SRP19/SPCS3/SEC63
KEGG_ERBB_SIGNALING_PATHWAY	KEGG_ERBB_SIGNALING_PATHWAY	83	-0.250886	-0.680453	0.99661	1	1	2158	tags=5%, list=7%, signal=4%	CAMK2A/PLCG2/PAK6
KEGG_GLUTATHIONE_METABOLISM	KEGG_GLUTATHIONE_METABOLISM	44	-0.237259	-0.584967	0.996766	1	1	2732	tags=7%, list=9%, signal=6%	GSTA1/GSTA2
KEGG_AMINO_SUGAR_AND_NUCLEOTIDE_SUGAR_METABOLISM	KEGG_AMINO_SUGAR_AND_NUCLEOTIDE_SUGAR_METABOLISM	40	-0.227418	-0.55051	0.997126	1	1	23682	tags=100%, list=77%, signal=23%	AMDHD2/NAGK/HK1/GPI/GNPNAT1/HEXA/HEXB/HK2/PGM1/GNPDA2/GMPPA/CYB5R3/RENBP/PMM1/GALT/CYB5R1/PGM3/UGP2/GNPDA1/MPI/NANS/GMPPB/UGDH/NPL/PGM2/PMM2/FPGT/GFPT1/TSTA3/GALE/GNE/CMAS/UAP1/GFPT2/GALK2/NANP/GMDS/GALK1/GCK
KEGG_ARACHIDONIC_ACID_METABOLISM	KEGG_ARACHIDONIC_ACID_METABOLISM	40	-0.223191	-0.540276	0.997701	1	1	7437	tags=29%, list=24%, signal=22%	ALOX15B/PLA2G1B/PTGS2/PLA2G5/EPHX2/PTGS1/CYP2E1/LTC4S/TBXAS1/CYP2C8/PLA2G4B
KEGG_SPHINGOLIPID_METABOLISM	KEGG_SPHINGOLIPID_METABOLISM	36	-0.237556	-0.564144	0.997879	1	1	10274	tags=47%, list=34%, signal=31%	CERK/SGPL1/SPHK1/ARSA/DEGS1/SPHK2/SGMS2/SMPD2/PLPP1/PLPP2/ACER3/ASAH2/SMPD1/NEU3/GAL3ST1/SMPD3
KEGG_DNA_REPLICATION	KEGG_DNA_REPLICATION	36	-0.235539	-0.559354	0.998072	1	1	12040	tags=56%, list=39%, signal=34%	RPA1/POLE/POLD4/FEN1/LIG1/MCM4/RFC5/MCM5/MCM2/PRIM2/PCNA/MCM3/MCM7/POLD2/POLD1/POLE4/DNA2/RPA4/RFC2
KEGG_GLYCEROLIPID_METABOLISM	KEGG_GLYCEROLIPID_METABOLISM	45	0.229761	0.574906	0.998533	1	1	8495	tags=22%, list=28%, signal=16%	DGKI/GPAT3/DGKH/GLYCTK/DGKB/LIPG/PLPP3/AGPAT4/ALDH2/ALDH3A2
KEGG_REGULATION_OF_ACTIN_CYTOSKELETON	KEGG_REGULATION_OF_ACTIN_CYTOSKELETON	192	-0.24694	-0.741442	0.998716	1	1	4082	tags=8%, list=13%, signal=7%	ITGB6/FGF17/PFN4/ITGB4/ITGA2B/FGFR4/NCKAP1L/WAS/PIP5K1B/ACTN3/FGFR3/FGF18/PAK6/MYLK2
KEGG_RNA_POLYMERASE	KEGG_RNA_POLYMERASE	29	-0.216001	-0.492527	0.998831	1	1	24029	tags=100%, list=78%, signal=22%	POLR2J2/POLR3A/POLR2J3/POLR2D/POLR1C/POLR1D/POLR1B/POLR3H/POLR1A/POLR2H/POLR2J/POLR2G/POLR3D/POLR3GL/POLR2J3/POLR3C/POLR2C/POLR3B/POLR2E/POLR2L/POLR1E/POLR2A/POLR2B/POLR2K/POLR3K/POLR3G/POLR2I/POLR2F/ZNRD1
KEGG_SELENOAMINO_ACID_METABOLISM	KEGG_SELENOAMINO_ACID_METABOLISM	24	0.213446	0.475243	0.99897	1	1	7606	tags=16%, list=25%, signal=12%	GGT1/METTL2B/METTL6/MARS2
KEGG_ADIPOCYTOKINE_SIGNALING_PATHWAY	KEGG_ADIPOCYTOKINE_SIGNALING_PATHWAY	60	0.226876	0.594664	0.999365	1	1	12176	tags=55%, list=40%, signal=33%	PRKCQ/PRKAG3/PPARGC1A/PPARA/ACSL1/SLC2A1/CD36/RELA/CPT1B/TNFRSF1B/ACACB/RXRB/LEP/ACSL5/RXRA/IKBKB/IRS1/NPY/PRKAA2/SOCS3/NFKB1/STAT3/CHUK/ADIPOQ/PRKAG2/LEPR/ADIPOR2/JAK2/CAMKK1/TRAF2/PRKAB2/MTOR/IRS2
KEGG_RENAL_CELL_CARCINOMA	KEGG_RENAL_CELL_CARCINOMA	68	0.222082	0.593266	0.999572	1	1	3627	tags=6%, list=12%, signal=5%	PIK3CG/TGFA/PDGFB/EGLN3
KEGG_VASOPRESSIN_REGULATED_WATER_REABSORPTION	KEGG_VASOPRESSIN_REGULATED_WATER_REABSORPTION	39	0.216783	0.528989	0.999583	1	1	8943	tags=21%, list=29%, signal=15%	CREB3L3/CREB3L2/CREB5/ARHGDIB/AQP3/PRKACA/ADCY6/DCTN1
KEGG_CIRCADIAN_RHYTHM_MAMMAL	KEGG_CIRCADIAN_RHYTHM_MAMMAL	12	-0.205074	-0.386344	0.999607	1	1	24360	tags=100%, list=80%, signal=21%	PER2/CRY1/PER3/CRY2/CSNK1D/NPAS2/BHLHE40/BHLHE41/NR1D1/ARNTL/CSNK1E
KEGG_VALINE_LEUCINE_AND_ISOLEUCINE_DEGRADATION	KEGG_VALINE_LEUCINE_AND_ISOLEUCINE_DEGRADATION	43	-0.208517	-0.511253	0.999616	1	1	24261	tags=100%, list=79%, signal=21%	AUH/OXCT2/OXCT1/ALDH2/ACAT2/ALDH6A1/ALDH3A2/HIBADH/MCEE/BCKDHA/AOX1/ACAT1/HIBCH/BCAT1/HADHA/ALDH1B1/ACADS/ALDH7A1/ACAA1/HADHB/IVD/ALDH9A1/MCCC2/HMGCS2/HSD17B10/DBT/BCAT2/MMUT/ECHS1/BCKDHB/ACAA2/DLD/MCCC1/ACAD8/ACADM/PCCB/PCCA/EHHADH/HADH/HMGCL/ACADSB/HMGCS1
KEGG_RIG_I_LIKE_RECEPTOR_SIGNALING_PATHWAY	KEGG_RIG_I_LIKE_RECEPTOR_SIGNALING_PATHWAY	55	-0.222523	-0.568221	0.999618	1	1	8749	tags=31%, list=29%, signal=22%	MAPK10/TRADD/FADD/MAPK8/CXCL8/NFKBIA/IFIH1/PIN1/CYLD/TRIM25/IRF3/IKBKG/MAPK14/NFKBIB/IL12B/IFNA5
KEGG_P53_SIGNALING_PATHWAY	KEGG_P53_SIGNALING_PATHWAY	66	-0.22954	-0.603938	0.999624	1	1	9753	tags=35%, list=32%, signal=24%	EI24/CCNG1/ZMAT3/DDB2/PIDD1/MDM2/SFN/CCNE1/SHISA5/FAS/CCNG2/CCNB1/CCNB2/SESN1/GTSE1/CDK1/PMAIP1/CCNB3/CHEK1/TP53AIP1/GADD45G/MDM4
KEGG_VEGF_SIGNALING_PATHWAY	KEGG_VEGF_SIGNALING_PATHWAY	67	-0.228844	-0.602859	0.999624	1	1	1637	tags=30%, list=5%, signal=28%	SPHK1/SRC/SHC2/PPP3CC/NFATC1/PLA2G1B/PTGS2/SPHK2/BAD/NFATC3/HRAS/PXN/PLA2G5/PIK3R2/PIK3R1/MAP2K2/MAPK14/PLA2G4B/PLCG2
KEGG_NON_SMALL_CELL_LUNG_CANCER	KEGG_NON_SMALL_CELL_LUNG_CANCER	51	0.201003	0.514226	0.99979	1	1	8154	tags=22%, list=27%, signal=16%	PIK3CG/TGFA/PRKCG/EGF/FHIT/E2F2/SOS1/CDKN2A/PIK3CD/RXRB/CASP9
KEGG_PROTEASOME	KEGG_PROTEASOME	43	0.208919	0.518628	0.999792	1	1	3795	tags=5%, list=12%, signal=4%	PSMC1P4/IFNG
KEGG_MISMATCH_REPAIR	KEGG_MISMATCH_REPAIR	23	-0.184015	-0.400646	0.999806	1	1	25007	tags=57%, list=82%, signal=10%	SSBP1/RPA1/POLD4/LIG1/RFC5/PCNA/MSH3/MSH6/POLD2/POLD1/RPA4/RFC2
KEGG_NICOTINATE_AND_NICOTINAMIDE_METABOLISM	KEGG_NICOTINATE_AND_NICOTINAMIDE_METABOLISM	23	-0.172984	-0.376628	0.999806	1	1	7278	tags=26%, list=24%, signal=20%	NT5C/NMNAT1/NMNAT2/QPRT/NT5M
KEGG_PROGESTERONE_MEDIATED_OOCYTE_MATURATION	KEGG_PROGESTERONE_MEDIATED_OOCYTE_MATURATION	81	-0.212293	-0.573514	0.999812	1	1	10317	tags=43%, list=34%, signal=29%	ANAPC13/CCNA1/MAPK12/PKMYT1/ANAPC2/MAPK13/CDC26/CDC23/BRAF/ANAPC10/CCNA2/BUB1/MAPK10/PLK1/ARAF/RPS6KA6/MAPK8/CDC25B/ADCY7/ANAPC11/SPDYA/MAD2L1/PIK3R2/CCNB1/CCNB2/PIK3R1/PRKX/ADCY5/CDK1/CDC25C/CCNB3/MAPK14/ADCY1/ADCY8

## Sheet: SDF-1+EX-4 vs EX-4
ID	Description	setSize	enrichmentScore	NES	pvalue	p.adjust	qvalues	rank	leading_edge	core_enrichment
KEGG_TYPE_II_DIABETES_MELLITUS	KEGG_TYPE_II_DIABETES_MELLITUS	40	0.73216	1.79617	0.000423191	0.0778671	0.0770653	1955	tags=18%, list=6%, signal=16%	MAFA/PKLR/CACNA1B/KCNJ11/PIK3CG/SLC2A4/PRKCZ
KEGG_VALINE_LEUCINE_AND_ISOLEUCINE_DEGRADATION	KEGG_VALINE_LEUCINE_AND_ISOLEUCINE_DEGRADATION	43	-0.675443	-1.64501	0.00469748	0.432168	0.427718	8	tags=9%, list=0%, signal=9%	EHHADH/HMGCL/IL4I1
KEGG_INSULIN_SIGNALING_PATHWAY	KEGG_INSULIN_SIGNALING_PATHWAY	125	0.489693	1.4244	0.0082737	0.507454	0.502228	2512	tags=6%, list=8%, signal=6%	PKLR/PIK3CG/PYGM/SLC2A4/RHOQ/PRKCZ/FBP1/SH2B2
KEGG_MATURITY_ONSET_DIABETES_OF_THE_YOUNG	KEGG_MATURITY_ONSET_DIABETES_OF_THE_YOUNG	13	0.797994	1.54418	0.0138745	0.568779	0.562922	831	tags=31%, list=3%, signal=30%	MAFA/PKLR/HNF4G/BHLHA15
KEGG_PHENYLALANINE_METABOLISM	KEGG_PHENYLALANINE_METABOLISM	16	-0.777539	-1.55968	0.015456	0.568779	0.562922	246	tags=19%, list=1%, signal=19%	TAT/IL4I1
KEGG_GLYCOSAMINOGLYCAN_BIOSYNTHESIS_CHONDROITIN_SULFATE	KEGG_GLYCOSAMINOGLYCAN_BIOSYNTHESIS_CHONDROITIN_SULFATE	21	-0.725661	-1.54452	0.0187919	0.576286	0.570352	2123	tags=14%, list=7%, signal=13%	B3GAT2/CHST13
KEGG_PYRUVATE_METABOLISM	KEGG_PYRUVATE_METABOLISM	38	0.602815	1.46589	0.0259439	0.681954	0.674931	730	tags=5%, list=2%, signal=5%	PKLR/LDHAL6A
KEGG_ALLOGRAFT_REJECTION	KEGG_ALLOGRAFT_REJECTION	25	0.654266	1.47253	0.0376963	0.748524	0.740816	4135	tags=36%, list=13%, signal=31%	HLA-DOA/HLA-DMB/IL5/IL12B/IFNG/FASLG/HLA-G/HLA-F/HLA-DPB1
KEGG_ENDOMETRIAL_CANCER	KEGG_ENDOMETRIAL_CANCER	52	0.546422	1.40483	0.0388961	0.748524	0.740816	428	tags=4%, list=1%, signal=4%	CTNNA2/PIK3CG
KEGG_TYROSINE_METABOLISM	KEGG_TYROSINE_METABOLISM	36	-0.597047	-1.40851	0.0442846	0.748524	0.740816	1318	tags=14%, list=4%, signal=13%	TYRP1/HGD/TAT/IL4I1
KEGG_ASTHMA	KEGG_ASTHMA	16	0.718549	1.46009	0.0455864	0.748524	0.740816	803	tags=25%, list=3%, signal=24%	HLA-DOA/HLA-DMB/IL5/RNASE3
KEGG_PENTOSE_AND_GLUCURONATE_INTERCONVERSIONS	KEGG_PENTOSE_AND_GLUCURONATE_INTERCONVERSIONS	15	0.723398	1.44482	0.0535159	0.748524	0.740816	1725	tags=27%, list=6%, signal=25%	UGT2B17/RPEL1/UGT2B11/UGT2B15
KEGG_TIGHT_JUNCTION	KEGG_TIGHT_JUNCTION	116	0.438314	1.26547	0.0566332	0.748524	0.740816	6165	tags=16%, list=20%, signal=13%	CLDN10/CTNNA2/MYH14/PRKCQ/CLDN3/PRKCZ/LLGL2/CLDN11/CLDN20/MYH15/F11R/RAB13/CSNK2B/CLDN7/CLDN23/AKT1/HCLS1/CSNK2A1/ASH1L
KEGG_PORPHYRIN_AND_CHLOROPHYLL_METABOLISM	KEGG_PORPHYRIN_AND_CHLOROPHYLL_METABOLISM	26	0.61091	1.38519	0.067364	0.748524	0.740816	1725	tags=12%, list=6%, signal=11%	UGT2B17/UGT2B11/UGT2B15
KEGG_LEISHMANIA_INFECTION	KEGG_LEISHMANIA_INFECTION	55	0.509096	1.31917	0.0707599	0.748524	0.740816	4135	tags=16%, list=13%, signal=14%	NCF1/HLA-DOA/HLA-DMB/IL12B/IFNG/PTPN6/TLR2/FCGR2A/HLA-DPB1
KEGG_STARCH_AND_SUCROSE_METABOLISM	KEGG_STARCH_AND_SUCROSE_METABOLISM	35	0.564121	1.35128	0.073617	0.748524	0.740816	1725	tags=11%, list=6%, signal=11%	UGT2B17/PYGM/UGT2B11/UGT2B15
KEGG_CARDIAC_MUSCLE_CONTRACTION	KEGG_CARDIAC_MUSCLE_CONTRACTION	62	-0.50293	-1.29858	0.0760104	0.748524	0.740816	3632	tags=15%, list=12%, signal=13%	CACNA2D2/ATP1A2/SLC9A6/ATP1A3/CACNA1D/CACNG8/COX8C/CACNA1F
KEGG_ASCORBATE_AND_ALDARATE_METABOLISM	KEGG_ASCORBATE_AND_ALDARATE_METABOLISM	13	0.72192	1.39697	0.0793125	0.748524	0.740816	1725	tags=23%, list=6%, signal=22%	UGT2B17/UGT2B11/UGT2B15
KEGG_BETA_ALANINE_METABOLISM	KEGG_BETA_ALANINE_METABOLISM	21	-0.650211	-1.38393	0.0803452	0.748524	0.740816	3885	tags=24%, list=13%, signal=21%	GAD1/GAD2/UPB1/DPYS
KEGG_INTESTINAL_IMMUNE_NETWORK_FOR_IGA_PRODUCTION	KEGG_INTESTINAL_IMMUNE_NETWORK_FOR_IGA_PRODUCTION	31	0.569167	1.3371	0.0817055	0.748524	0.740816	406	tags=13%, list=1%, signal=13%	HLA-DOA/TNFRSF17/HLA-DMB/IL5
KEGG_VIRAL_MYOCARDITIS	KEGG_VIRAL_MYOCARDITIS	57	0.492796	1.28693	0.0854293	0.748524	0.740816	4135	tags=14%, list=13%, signal=12%	MYH14/HLA-DOA/HLA-DMB/SGCA/HLA-G/MYH15/HLA-F/HLA-DPB1
KEGG_BASAL_TRANSCRIPTION_FACTORS	KEGG_BASAL_TRANSCRIPTION_FACTORS	35	-0.56038	-1.31601	0.0920407	0.769795	0.761868	14	tags=6%, list=0%, signal=6%	GTF2A1L
KEGG_LONG_TERM_POTENTIATION	KEGG_LONG_TERM_POTENTIATION	62	-0.477109	-1.23191	0.125324	0.978935	0.968854	6498	tags=18%, list=21%, signal=14%	CAMK2D/PLCB4/CAMK4/PLCB2/GRIN2C/ADCY1/GRIN2B/ADCY8/GRIN2A/GRIA2
KEGG_EPITHELIAL_CELL_SIGNALING_IN_HELICOBACTER_PYLORI_INFECTION	KEGG_EPITHELIAL_CELL_SIGNALING_IN_HELICOBACTER_PYLORI_INFECTION	66	-0.470286	-1.22648	0.127687	0.978935	0.968854	4083	tags=20%, list=13%, signal=17%	ATP6V1G2/MAPK12/ATP6V1H/MAPK8/HBEGF/CXCL8/ATP6V1B1/ATP6V1C2/CCL5/ATP6V1G3/PTPRZ1/PLCG2
KEGG_TYPE_I_DIABETES_MELLITUS	KEGG_TYPE_I_DIABETES_MELLITUS	28	0.542331	1.24652	0.155672	1	0.989703	5350	tags=36%, list=17%, signal=30%	HLA-DOA/HLA-DMB/IL12B/IFNG/FASLG/HLA-G/HLA-F/HLA-DPB1/FAS/ICA1
KEGG_PROSTATE_CANCER	KEGG_PROSTATE_CANCER	85	0.420922	1.16413	0.16273	1	0.989703	906	tags=4%, list=3%, signal=3%	PIK3CG/KLK3/TGFA
KEGG_CYSTEINE_AND_METHIONINE_METABOLISM	KEGG_CYSTEINE_AND_METHIONINE_METABOLISM	32	-0.53426	-1.22983	0.163456	1	0.989703	246	tags=9%, list=1%, signal=9%	TAT/IL4I1
KEGG_DRUG_METABOLISM_CYTOCHROME_P450	KEGG_DRUG_METABOLISM_CYTOCHROME_P450	48	0.470158	1.19125	0.165875	1	0.989703	1725	tags=12%, list=6%, signal=12%	CYP2A6/UGT2B17/CYP2A7/CYP2C9/UGT2B11/UGT2B15
KEGG_BUTANOATE_METABOLISM	KEGG_BUTANOATE_METABOLISM	30	-0.541173	-1.23072	0.167175	1	0.989703	3885	tags=27%, list=13%, signal=23%	HMGCL/ALDH5A1/GAD1/GAD2/BDH1/ACSM5/ACSM4
KEGG_PROPANOATE_METABOLISM	KEGG_PROPANOATE_METABOLISM	33	0.513667	1.21937	0.168987	1	0.989703	1177	tags=6%, list=4%, signal=6%	LDHAL6A/SUCLG2P2
KEGG_AMYOTROPHIC_LATERAL_SCLEROSIS_ALS	KEGG_AMYOTROPHIC_LATERAL_SCLEROSIS_ALS	47	-0.482566	-1.19358	0.176777	1	0.989703	3655	tags=9%, list=12%, signal=8%	GRIN2B/GRIN2A/GRIA2
KEGG_FOLATE_BIOSYNTHESIS	KEGG_FOLATE_BIOSYNTHESIS	10	0.697222	1.27457	0.181312	1	0.989703	439	tags=10%, list=1%, signal=10%	ALPP
KEGG_PRIMARY_IMMUNODEFICIENCY	KEGG_PRIMARY_IMMUNODEFICIENCY	25	-0.555162	-1.21687	0.190358	1	0.989703	3498	tags=20%, list=11%, signal=18%	BLNK/CD19/PTPRC/ZAP70
KEGG_VIBRIO_CHOLERAE_INFECTION	KEGG_VIBRIO_CHOLERAE_INFECTION	51	-0.468976	-1.17503	0.192086	1	0.989703	4270	tags=25%, list=14%, signal=22%	ATP6V1C1/ATP6V1D/SEC61G/TJP2/ATP6V1G2/GNAS/ATP6V1H/ARF1/ATP6V1B1/ATP6V1C2/ATP6V1G3/PLCG2
KEGG_GLYCEROLIPID_METABOLISM	KEGG_GLYCEROLIPID_METABOLISM	44	0.470359	1.17356	0.193106	1	0.989703	950	tags=5%, list=3%, signal=4%	DGKB/DGKI
KEGG_GLYOXYLATE_AND_DICARBOXYLATE_METABOLISM	KEGG_GLYOXYLATE_AND_DICARBOXYLATE_METABOLISM	15	0.61884	1.23599	0.20224	1	0.989703	1184	tags=7%, list=4%, signal=6%	HAO2
KEGG_JAK_STAT_SIGNALING_PATHWAY	KEGG_JAK_STAT_SIGNALING_PATHWAY	116	0.384573	1.11031	0.215385	1	0.989703	1970	tags=7%, list=6%, signal=6%	IL5/PIK3CG/CSF2RB/IFNA5/IL12B/IL2RB/IFNG/PTPN6
KEGG_PEROXISOME	KEGG_PEROXISOME	74	0.4122	1.11621	0.232354	1	0.989703	7917	tags=27%, list=26%, signal=20%	SLC27A2/SOD2/HAO2/DDO/PIPOX/AMACR/MPV17L/PEX10/ACOX1/PECR/PEX5/ACSL5/FAR2/PEX12/HACL1/SOD2/PXMP4/MPV17/DHRS4/ACOX2
KEGG_TRYPTOPHAN_METABOLISM	KEGG_TRYPTOPHAN_METABOLISM	32	-0.503402	-1.1588	0.234789	1	0.989703	8	tags=9%, list=0%, signal=9%	IDO2/IL4I1
KEGG_ACUTE_MYELOID_LEUKEMIA	KEGG_ACUTE_MYELOID_LEUKEMIA	56	0.430517	1.11929	0.239296	1	0.989703	6391	tags=16%, list=21%, signal=13%	PIK3CG/SPI1/TCF7L2/ZBTB16/AKT1/BRAF/CEBPA/PIK3R2/RELA
KEGG_GRAFT_VERSUS_HOST_DISEASE	KEGG_GRAFT_VERSUS_HOST_DISEASE	22	0.529105	1.15875	0.250157	1	0.989703	4956	tags=36%, list=16%, signal=31%	HLA-DOA/HLA-DMB/IFNG/FASLG/HLA-G/HLA-F/HLA-DPB1/FAS
KEGG_ALANINE_ASPARTATE_AND_GLUTAMATE_METABOLISM	KEGG_ALANINE_ASPARTATE_AND_GLUTAMATE_METABOLISM	27	-0.515074	-1.14558	0.253734	1	0.989703	8	tags=7%, list=0%, signal=7%	IL4I1
KEGG_VASCULAR_SMOOTH_MUSCLE_CONTRACTION	KEGG_VASCULAR_SMOOTH_MUSCLE_CONTRACTION	99	-0.395104	-1.09162	0.261822	1	0.989703	3260	tags=16%, list=11%, signal=14%	RAMP2/PLA2G2A/ROCK1/MYLK3/PLCB2/PLA2G4B/ADCY1/PLA2G1B/MRVI1/CACNA1D/PLA2G12B/ADCY8/CACNA1F/AVPR1A/MYLK2
KEGG_PANTOTHENATE_AND_COA_BIOSYNTHESIS	KEGG_PANTOTHENATE_AND_COA_BIOSYNTHESIS	15	-0.591823	-1.17221	0.267323	1	0.989703	2082	tags=47%, list=7%, signal=44%	ENPP1/PANK2/PANK1/PPCS/UPB1/DPYS
KEGG_GLYCINE_SERINE_AND_THREONINE_METABOLISM	KEGG_GLYCINE_SERINE_AND_THREONINE_METABOLISM	27	0.495167	1.12996	0.268619	1	0.989703	7236	tags=30%, list=24%, signal=23%	GATM/PIPOX/SDS/AMT/MAOB/GLDC/PHGDH/SARDH
KEGG_GALACTOSE_METABOLISM	KEGG_GALACTOSE_METABOLISM	24	-0.524206	-1.14005	0.274981	1	0.989703	3274	tags=17%, list=11%, signal=15%	GCK/MGAM/LCT
KEGG_PANCREATIC_CANCER	KEGG_PANCREATIC_CANCER	69	0.403541	1.08374	0.288705	1	0.989703	906	tags=3%, list=3%, signal=3%	PIK3CG/TGFA
KEGG_METABOLISM_OF_XENOBIOTICS_BY_CYTOCHROME_P450	KEGG_METABOLISM_OF_XENOBIOTICS_BY_CYTOCHROME_P450	44	0.436926	1.09015	0.301434	1	0.989703	1725	tags=11%, list=6%, signal=11%	UGT2B17/CYP2C9/CYP2S1/UGT2B11/UGT2B15
KEGG_RENIN_ANGIOTENSIN_SYSTEM	KEGG_RENIN_ANGIOTENSIN_SYSTEM	13	0.586851	1.13561	0.310416	1	0.989703	8189	tags=31%, list=27%, signal=23%	CPA3/AGT/ACE/NLN
KEGG_ABC_TRANSPORTERS	KEGG_ABC_TRANSPORTERS	41	0.437395	1.07674	0.322099	1	0.989703	5387	tags=20%, list=18%, signal=16%	ABCG1/ABCC11/ABCG8/ABCA12/ABCB1/ABCB4/ABCC12/CFTR
KEGG_CYTOSOLIC_DNA_SENSING_PATHWAY	KEGG_CYTOSOLIC_DNA_SENSING_PATHWAY	41	0.436264	1.07395	0.326152	1	0.989703	3697	tags=12%, list=12%, signal=11%	IL18/IFNA5/IL33/CCL4L2/TREX1
KEGG_CALCIUM_SIGNALING_PATHWAY	KEGG_CALCIUM_SIGNALING_PATHWAY	153	-0.359288	-1.0473	0.328841	1	0.989703	4330	tags=13%, list=14%, signal=11%	TACR2/ATP2B4/GRIN2C/TNNC1/P2RX1/ADCY1/CYSLTR2/PTGER1/CACNA1D/HTR6/PLN/ADCY8/GRIN2A/ADRB1/CACNA1F/GRPR/AVPR1A/MYLK2/PLCG2
KEGG_DRUG_METABOLISM_OTHER_ENZYMES	KEGG_DRUG_METABOLISM_OTHER_ENZYMES	36	0.438909	1.05701	0.353752	1	0.989703	1725	tags=17%, list=6%, signal=16%	CYP2A6/UGT2B17/NAT2/CYP2A7/UGT2B11/UGT2B15
KEGG_AUTOIMMUNE_THYROID_DISEASE	KEGG_AUTOIMMUNE_THYROID_DISEASE	29	0.458563	1.06316	0.35536	1	0.989703	4135	tags=28%, list=13%, signal=24%	HLA-DOA/HLA-DMB/IL5/IFNA5/FASLG/HLA-G/HLA-F/HLA-DPB1
KEGG_COMPLEMENT_AND_COAGULATION_CASCADES	KEGG_COMPLEMENT_AND_COAGULATION_CASCADES	54	-0.411956	-1.0416	0.38068	1	0.989703	1236	tags=9%, list=4%, signal=9%	SERPIND1/C9/KNG1/F13A1
KEGG_GLYCOSAMINOGLYCAN_BIOSYNTHESIS_HEPARAN_SULFATE	KEGG_GLYCOSAMINOGLYCAN_BIOSYNTHESIS_HEPARAN_SULFATE	24	-0.484933	-1.05464	0.38163	1	0.989703	7694	tags=33%, list=25%, signal=25%	EXTL2/NDST1/HS3ST3B1/GLCE/HS3ST2/HS3ST5/B3GAT2
KEGG_GLYCOLYSIS_GLUCONEOGENESIS	KEGG_GLYCOLYSIS_GLUCONEOGENESIS	54	0.396254	1.02347	0.400828	1	0.989703	2170	tags=6%, list=7%, signal=5%	PKLR/LDHAL6A/FBP1
KEGG_GLYCOSPHINGOLIPID_BIOSYNTHESIS_GANGLIO_SERIES	KEGG_GLYCOSPHINGOLIPID_BIOSYNTHESIS_GANGLIO_SERIES	15	-0.522036	-1.03399	0.423084	1	0.989703	1065	tags=27%, list=3%, signal=26%	ST3GAL2/ST8SIA1/ST8SIA5
KEGG_DILATED_CARDIOMYOPATHY	KEGG_DILATED_CARDIOMYOPATHY	76	-0.374672	-0.999405	0.444834	1	0.989703	4005	tags=13%, list=13%, signal=11%	TNNC1/CACNA2D2/ADCY1/CACNA1D/PLN/CACNG8/ADCY8/ADRB1/CACNA1F
KEGG_ARGININE_AND_PROLINE_METABOLISM	KEGG_ARGININE_AND_PROLINE_METABOLISM	50	0.39039	0.995154	0.456876	1	0.989703	2363	tags=6%, list=8%, signal=6%	GLS2/GATM/CKMT1B
KEGG_LYSOSOME	KEGG_LYSOSOME	118	0.341714	0.987645	0.466204	1	0.989703	10337	tags=38%, list=34%, signal=25%	DNASE2B/LAMP3/HYAL1/AP1M2/SLC11A1/SGSH/NEU1/NAPSA/AP1S3/CTSH/NAGPA/ATP6V0D1/ACP5/ATP6V0D2/CLN5/GAA/HGSNAT/PPT2/AP4M1/GUSB/CTNS/ATP6V0A1/MAN2B1/GGA1/GBA/ATP6V0C/CTSD/AP1S1/AP3S2/ABCB9/LAMP1/CTSS/AP3D1/GGA3/AP3S1/GNPTG/CD63/GLA/NAGA/AGA/CTSZ/CLN3/CTSB/DNASE2/ATP6V0B
KEGG_RNA_DEGRADATION	KEGG_RNA_DEGRADATION	58	-0.384966	-0.982016	0.482463	1	0.989703	6915	tags=16%, list=23%, signal=12%	EXOSC2/ENO3/ENO2/CNOT2/LSM6/PAPOLA/CNOT8/PAPOLB
KEGG_SMALL_CELL_LUNG_CANCER	KEGG_SMALL_CELL_LUNG_CANCER	83	0.353457	0.973084	0.503507	1	0.989703	6764	tags=17%, list=22%, signal=13%	PIK3CG/COL4A6/ITGA2B/ITGA2/FHIT/TRAF3/RARB/ITGA6/AKT1/RB1/PIK3R2/RELA/LAMB3/TRAF4
KEGG_CITRATE_CYCLE_TCA_CYCLE	KEGG_CITRATE_CYCLE_TCA_CYCLE	28	0.418799	0.962588	0.508193	1	0.989703	1177	tags=4%, list=4%, signal=3%	SUCLG2P2
KEGG_REGULATION_OF_AUTOPHAGY	KEGG_REGULATION_OF_AUTOPHAGY	23	0.432005	0.956493	0.520716	1	0.989703	1689	tags=9%, list=5%, signal=8%	IFNA5/IFNG
KEGG_NATURAL_KILLER_CELL_MEDIATED_CYTOTOXICITY	KEGG_NATURAL_KILLER_CELL_MEDIATED_CYTOTOXICITY	99	-0.348859	-0.963853	0.527875	1	0.989703	2526	tags=8%, list=8%, signal=7%	ITGAL/TNFRSF10C/KLRD1/IFNA1/KLRC2/ZAP70/PLCG2
KEGG_GNRH_SIGNALING_PATHWAY	KEGG_GNRH_SIGNALING_PATHWAY	89	-0.348362	-0.948859	0.551235	1	0.989703	7174	tags=22%, list=23%, signal=17%	MAPK12/PLA2G6/GNAS/MAPK8/HBEGF/CALM3/CAMK2D/PLCB4/PLA2G2A/MAP3K1/PLCB2/PLA2G4B/ADCY1/PLA2G1B/MAP2K7/CACNA1D/PLA2G12B/ADCY8/CACNA1F
KEGG_PYRIMIDINE_METABOLISM	KEGG_PYRIMIDINE_METABOLISM	97	-0.343817	-0.945746	0.569279	1	0.989703	2082	tags=34%, list=7%, signal=31%	POLR2C/TK2/NME3/PNP/POLR3C/POLE4/POLR2B/POLA2/POLA1/RRM1/TYMS/NT5M/DCK/POLR3K/UMPS/POLR2K/POLR3G/TK1/CAD/UCK1/POLD3/NME6/POLD4/AK3/CMPK2/NME1-NME2/NME5/UPP2/UPB1/CANT1/DPYS/CDA
KEGG_MISMATCH_REPAIR	KEGG_MISMATCH_REPAIR	23	-0.428272	-0.924041	0.571071	1	0.989703	9875	tags=39%, list=32%, signal=27%	EXO1/MSH6/POLD3/RFC5/MSH2/POLD4/RFC2/RPA4
KEGG_RETINOL_METABOLISM	KEGG_RETINOL_METABOLISM	38	0.38104	0.926591	0.581945	1	0.989703	1725	tags=16%, list=6%, signal=15%	CYP2A6/UGT2B17/CYP2A7/CYP2C9/UGT2B11/UGT2B15
KEGG_ALZHEIMERS_DISEASE	KEGG_ALZHEIMERS_DISEASE	153	-0.325036	-0.947461	0.58814	1	0.989703	2315	tags=11%, list=8%, signal=10%	NDUFA4L2/ATP5PO/COX7C/ATP2A1/CASP9/COX7A2L/CALM3/PLCB4/RYR3/PLCB2/GRIN2C/GRIN2B/CACNA1D/COX8C/GRIN2A/CACNA1F
KEGG_OTHER_GLYCAN_DEGRADATION	KEGG_OTHER_GLYCAN_DEGRADATION	15	0.451816	0.902399	0.598216	1	0.989703	11589	tags=47%, list=38%, signal=29%	NEU1/MAN2B1/GBA/MAN2B2/AGA/GLB1/HEXB
KEGG_GLYCOSAMINOGLYCAN_BIOSYNTHESIS_KERATAN_SULFATE	KEGG_GLYCOSAMINOGLYCAN_BIOSYNTHESIS_KERATAN_SULFATE	15	0.449443	0.897659	0.602987	1	0.989703	2422	tags=7%, list=8%, signal=6%	B3GNT7
KEGG_O_GLYCAN_BIOSYNTHESIS	KEGG_O_GLYCAN_BIOSYNTHESIS	27	-0.409573	-0.91093	0.603409	1	0.989703	6584	tags=22%, list=21%, signal=17%	GALNT4/GALNT12/GALNTL6/GCNT3/GALNT13
KEGG_LEUKOCYTE_TRANSENDOTHELIAL_MIGRATION	KEGG_LEUKOCYTE_TRANSENDOTHELIAL_MIGRATION	102	0.328805	0.931947	0.615824	1	0.989703	2042	tags=7%, list=7%, signal=6%	CLDN10/CTNNA2/NCF1/PIK3CG/NOX3/CLDN3/CYBB
KEGG_HEDGEHOG_SIGNALING_PATHWAY	KEGG_HEDGEHOG_SIGNALING_PATHWAY	50	-0.363472	-0.908721	0.625486	1	0.989703	1998	tags=10%, list=7%, signal=9%	DHH/BMP5/WNT4/CSNK1A1L
KEGG_SYSTEMIC_LUPUS_ERYTHEMATOSUS	KEGG_SYSTEMIC_LUPUS_ERYTHEMATOSUS	42	0.364759	0.901687	0.632233	1	0.989703	1689	tags=10%, list=5%, signal=9%	HLA-DOA/HLA-DMB/C8B/IFNG
KEGG_T_CELL_RECEPTOR_SIGNALING_PATHWAY	KEGG_T_CELL_RECEPTOR_SIGNALING_PATHWAY	90	0.32994	0.92089	0.640594	1	0.989703	1970	tags=7%, list=6%, signal=6%	IL5/PIK3CG/PRKCQ/CD247/IFNG/PTPN6
KEGG_DNA_REPLICATION	KEGG_DNA_REPLICATION	36	-0.378162	-0.892131	0.647994	1	0.989703	11219	tags=47%, list=37%, signal=30%	MCM6/POLE/POLE4/MCM4/POLA2/POLA1/MCM3/RNASEH2A/MCM5/POLD3/RFC5/POLD4/DNA2/RFC2/RNASEH2C/RPA4
KEGG_RENAL_CELL_CARCINOMA	KEGG_RENAL_CELL_CARCINOMA	68	0.337148	0.903534	0.653444	1	0.989703	906	tags=3%, list=3%, signal=3%	PIK3CG/TGFA
KEGG_MELANOMA	KEGG_MELANOMA	62	0.341905	0.903153	0.653646	1	0.989703	649	tags=3%, list=2%, signal=3%	PIK3CG/FGF9
KEGG_NEUROACTIVE_LIGAND_RECEPTOR_INTERACTION	KEGG_NEUROACTIVE_LIGAND_RECEPTOR_INTERACTION	184	-0.313386	-0.93057	0.654212	1	0.989703	4649	tags=18%, list=15%, signal=15%	GRM7/OPRD1/GRM6/TACR2/F2RL3/HTR1B/GRIN2C/PRSS3/MCHR1/P2RX1/NPFFR2/GRIN3B/FPR2/CYSLTR2/GLRA3/GRID2/GABRB2/GRIN2B/FSHR/P2RY4/PTGER1/HTR6/LPAR6/TAAR1/ADRA2B/MTNR1B/GRIN2A/GZMA/GRIA2/ADRB1/GRPR/AVPR1A
KEGG_TOLL_LIKE_RECEPTOR_SIGNALING_PATHWAY	KEGG_TOLL_LIKE_RECEPTOR_SIGNALING_PATHWAY	83	0.331351	0.912226	0.658483	1	0.989703	4989	tags=12%, list=16%, signal=10%	PIK3CG/IFNA5/IRF5/IL12B/CXCL11/TLR2/TLR6/MAP2K6/TRAF3/MAPK11
KEGG_STEROID_HORMONE_BIOSYNTHESIS	KEGG_STEROID_HORMONE_BIOSYNTHESIS	33	0.369215	0.876464	0.672574	1	0.989703	3412	tags=15%, list=11%, signal=13%	UGT2B17/UGT2B11/UGT2B15/SRD5A1/CYP11A1
KEGG_CHRONIC_MYELOID_LEUKEMIA	KEGG_CHRONIC_MYELOID_LEUKEMIA	71	0.329685	0.888291	0.691115	1	0.989703	10482	tags=28%, list=34%, signal=19%	PIK3CG/AKT1/BRAF/RB1/PIK3R2/RELA/GRB2/SHC2/IKBKG/CDKN2A/SOS1/MYC/CTBP1/BCL2L1/TGFB2/PIK3R3/TP53/ABL1/CDK4/RAF1
KEGG_VASOPRESSIN_REGULATED_WATER_REABSORPTION	KEGG_VASOPRESSIN_REGULATED_WATER_REABSORPTION	38	0.355536	0.864574	0.703227	1	0.989703	6574	tags=18%, list=21%, signal=14%	RAB5B/CREB1/RAB5C/ADCY6/NSF/DCTN4/DCTN5
KEGG_PPAR_SIGNALING_PATHWAY	KEGG_PPAR_SIGNALING_PATHWAY	57	0.337576	0.881573	0.703816	1	0.989703	9258	tags=35%, list=30%, signal=25%	SLC27A2/PPARA/AQP7/ACADL/ACOX1/FABP3/PPARG/ACSL5/CD36/LPL/ANGPTL4/ACOX2/PLIN1/RXRB/PDPK1/CPT2/FABP5/SCP2/MMP1/PLTP
KEGG_OLFACTORY_TRANSDUCTION	KEGG_OLFACTORY_TRANSDUCTION	75	0.326837	0.886564	0.704749	1	0.989703	3186	tags=17%, list=10%, signal=16%	OR2F2/OR56B1/OR4F16/OR3A3/OR52I1/OR1F1/OR1J1/OR7A5/OR10A3/OR4F3/OR2L2/OR1J2/OR2H2
KEGG_ANTIGEN_PROCESSING_AND_PRESENTATION	KEGG_ANTIGEN_PROCESSING_AND_PRESENTATION	56	0.338022	0.878815	0.705499	1	0.989703	4135	tags=12%, list=13%, signal=11%	HLA-DOA/HLA-DMB/IFNA5/CREB1/HLA-G/HLA-F/HLA-DPB1
KEGG_PRIMARY_BILE_ACID_BIOSYNTHESIS	KEGG_PRIMARY_BILE_ACID_BIOSYNTHESIS	13	-0.430681	-0.828012	0.70578	1	0.989703	1954	tags=15%, list=6%, signal=14%	CYP7A1
KEGG_APOPTOSIS	KEGG_APOPTOSIS	79	0.324305	0.88633	0.711749	1	0.989703	496	tags=3%, list=2%, signal=2%	PIK3CG/CSF2RB
KEGG_NON_SMALL_CELL_LUNG_CANCER	KEGG_NON_SMALL_CELL_LUNG_CANCER	52	0.33814	0.869344	0.721643	1	0.989703	6342	tags=19%, list=21%, signal=15%	PIK3CG/TGFA/STK4/FHIT/RASSF5/RARB/AKT1/BRAF/RB1/PIK3R2
KEGG_B_CELL_RECEPTOR_SIGNALING_PATHWAY	KEGG_B_CELL_RECEPTOR_SIGNALING_PATHWAY	65	-0.332117	-0.864095	0.738325	1	0.989703	3079	tags=9%, list=10%, signal=8%	BLNK/NFKBIB/PIK3AP1/CD19/PLCG2
KEGG_INOSITOL_PHOSPHATE_METABOLISM	KEGG_INOSITOL_PHOSPHATE_METABOLISM	52	-0.337235	-0.847838	0.75537	1	0.989703	6561	tags=17%, list=21%, signal=14%	SYNJ1/PLCB4/INPP1/PLCB2/INPP4A/MIOX/PIP5K1B/PLCG2
KEGG_ADIPOCYTOKINE_SIGNALING_PATHWAY	KEGG_ADIPOCYTOKINE_SIGNALING_PATHWAY	61	0.325253	0.857404	0.75789	1	0.989703	7222	tags=20%, list=23%, signal=15%	PRKCQ/SLC2A4/PPARA/PRKAG3/AKT1/PRKAG1/RELA/ACSL5/CD36/SLC2A1/ADIPOR1/ACACB
KEGG_MTOR_SIGNALING_PATHWAY	KEGG_MTOR_SIGNALING_PATHWAY	49	0.330649	0.839473	0.782524	1	0.989703	428	tags=2%, list=1%, signal=2%	PIK3CG
KEGG_HISTIDINE_METABOLISM	KEGG_HISTIDINE_METABOLISM	23	0.3612	0.799726	0.782636	1	0.989703	4272	tags=9%, list=14%, signal=7%	DDC/MAOB
KEGG_TGF_BETA_SIGNALING_PATHWAY	KEGG_TGF_BETA_SIGNALING_PATHWAY	83	0.312555	0.86048	0.78562	1	0.989703	3570	tags=8%, list=12%, signal=7%	LEFTY2/BMP7/IFNG/AMH/AMHR2/LEFTY1/PITX2
KEGG_GLYCEROPHOSPHOLIPID_METABOLISM	KEGG_GLYCEROPHOSPHOLIPID_METABOLISM	70	0.314644	0.84712	0.786072	1	0.989703	1040	tags=4%, list=3%, signal=4%	DGKB/DGKI/PLA2G3
KEGG_PENTOSE_PHOSPHATE_PATHWAY	KEGG_PENTOSE_PHOSPHATE_PATHWAY	23	0.357568	0.791684	0.794295	1	0.989703	2170	tags=9%, list=7%, signal=8%	RPEL1/FBP1
KEGG_BASAL_CELL_CARCINOMA	KEGG_BASAL_CELL_CARCINOMA	51	0.324656	0.831728	0.795627	1	0.989703	5960	tags=16%, list=19%, signal=13%	WNT8B/FZD10/WNT10A/HHIP/DVL3/TCF7L2/PTCH2/WNT2
KEGG_MELANOGENESIS	KEGG_MELANOGENESIS	92	0.308981	0.864818	0.798468	1	0.989703	4471	tags=11%, list=15%, signal=9%	ASIP/WNT8B/FZD10/EDN1/WNT10A/CREB1/GNAO1/CALML6/DVL3/TCF7L2
KEGG_SULFUR_METABOLISM	KEGG_SULFUR_METABOLISM	13	0.392907	0.760307	0.800787	1	0.989703	125	tags=8%, list=0%, signal=8%	SULT1A2
KEGG_PURINE_METABOLISM	KEGG_PURINE_METABOLISM	148	0.296629	0.880845	0.813105	1	0.989703	576	tags=2%, list=2%, signal=2%	PKLR/GDA/PDE4C
KEGG_PROTEASOME	KEGG_PROTEASOME	44	-0.329987	-0.807168	0.815419	1	0.989703	889	tags=23%, list=3%, signal=22%	POMP/PSMA1/PSMA3/PSMD12/PSMA2/PSMA4/PSMC6/PSME3/PSMC1P4
KEGG_RIBOSOME	KEGG_RIBOSOME	87	0.305264	0.848112	0.825082	1	0.989703	12261	tags=48%, list=40%, signal=29%	RPL3L/RSL24D1P11/RPS26/RPLP0/RPS2/RPL15/RPL26/RPS3A/RPS11/RPL29/RPL41/RPL8/RPL7/RPS27/RPL27/RPS4Y1/RPL35/RPL13/RPS9/RPL39/RPL4/RPS15A/RPL23A/RPL37/RPL10/RPL7A/RPS5/RPL13A/RPL18/RPL17/RPSA/RPS3/RPL36/RPS8/RPL12/RPL10A/RPL18A/RPL28/RPS7/RPS16/RPL36A/MRPL13
KEGG_ARACHIDONIC_ACID_METABOLISM	KEGG_ARACHIDONIC_ACID_METABOLISM	39	0.328237	0.800818	0.825626	1	0.989703	1439	tags=8%, list=5%, signal=7%	CYP2C9/PLA2G3/ALOX15
KEGG_PHOSPHATIDYLINOSITOL_SIGNALING_SYSTEM	KEGG_PHOSPHATIDYLINOSITOL_SIGNALING_SYSTEM	71	0.307375	0.828178	0.829513	1	0.989703	950	tags=4%, list=3%, signal=4%	DGKB/PIK3CG/DGKI
KEGG_CYTOKINE_CYTOKINE_RECEPTOR_INTERACTION	KEGG_CYTOKINE_CYTOKINE_RECEPTOR_INTERACTION	184	0.290119	0.885372	0.829989	1	0.989703	5429	tags=18%, list=18%, signal=15%	TNFRSF17/IL5/CSF2RB/IL18/IFNA5/IL12B/IL2RB/BMP7/KDR/IFNG/CXCR6/CXCL11/CXCL3/AMH/AMHR2/FASLG/CCL4L2/TNFRSF13C/TNFRSF6B/LTB/IL6R/TNFRSF25/CX3CR1/PF4V1/PRLR/CXCR4/IL1R2/FAS/EDA/CCL8/IL20RA/CSF2RA/CCL3L1
KEGG_LINOLEIC_ACID_METABOLISM	KEGG_LINOLEIC_ACID_METABOLISM	19	-0.360537	-0.752353	0.83084	1	0.989703	4650	tags=37%, list=15%, signal=31%	CYP3A5/PLA2G4B/PLA2G1B/CYP2C8/PLA2G12B/CYP3A7
KEGG_ALDOSTERONE_REGULATED_SODIUM_REABSORPTION	KEGG_ALDOSTERONE_REGULATED_SODIUM_REABSORPTION	34	0.328498	0.784165	0.839687	1	0.989703	2537	tags=6%, list=8%, signal=5%	PIK3CG/KCNJ1
KEGG_FC_EPSILON_RI_SIGNALING_PATHWAY	KEGG_FC_EPSILON_RI_SIGNALING_PATHWAY	63	0.309786	0.821061	0.839853	1	0.989703	1040	tags=5%, list=3%, signal=5%	IL5/PIK3CG/PLA2G3
KEGG_AMINOACYL_TRNA_BIOSYNTHESIS	KEGG_AMINOACYL_TRNA_BIOSYNTHESIS	22	0.346734	0.759351	0.844435	1	0.989703	8507	tags=27%, list=28%, signal=20%	SARS2/EARS2/NARS2/LARS2/MARS2/WARS2
KEGG_GLYCOSPHINGOLIPID_BIOSYNTHESIS_GLOBO_SERIES	KEGG_GLYCOSPHINGOLIPID_BIOSYNTHESIS_GLOBO_SERIES	12	0.375923	0.713846	0.854722	1	0.989703	4057	tags=17%, list=13%, signal=14%	FUT1/FUT2
KEGG_FC_GAMMA_R_MEDIATED_PHAGOCYTOSIS	KEGG_FC_GAMMA_R_MEDIATED_PHAGOCYTOSIS	91	-0.303568	-0.829718	0.856643	1	0.989703	1850	tags=4%, list=6%, signal=4%	PTPRC/WAS/PLCG2
KEGG_CELL_ADHESION_MOLECULES_CAMS	KEGG_CELL_ADHESION_MOLECULES_CAMS	106	0.296643	0.846115	0.857425	1	0.989703	6160	tags=27%, list=20%, signal=22%	CLDN10/HLA-DOA/HLA-DMB/CADM3/CLDN3/L1CAM/SELL/CNTN2/CLDN11/CLDN20/HLA-G/ITGB7/ICAM2/HLA-F/HLA-DPB1/F11R/MPZ/ITGB8/CDH3/CLDN7/CNTN1/ITGA6/NRXN2/CLDN23/MADCAM1/CD226/NFASC/CD276/NRCAM
KEGG_GLIOMA	KEGG_GLIOMA	61	0.307492	0.810584	0.859274	1	0.989703	906	tags=3%, list=3%, signal=3%	PIK3CG/TGFA
KEGG_GLYCOSPHINGOLIPID_BIOSYNTHESIS_LACTO_AND_NEOLACTO_SERIES	KEGG_GLYCOSPHINGOLIPID_BIOSYNTHESIS_LACTO_AND_NEOLACTO_SERIES	19	-0.345524	-0.721026	0.872459	1	0.989703	2607	tags=16%, list=8%, signal=14%	GCNT2/B3GALT1
KEGG_ARRHYTHMOGENIC_RIGHT_VENTRICULAR_CARDIOMYOPATHY_ARVC	KEGG_ARRHYTHMOGENIC_RIGHT_VENTRICULAR_CARDIOMYOPATHY_ARVC	67	0.300585	0.804914	0.873913	1	0.989703	7167	tags=27%, list=23%, signal=21%	CTNNA2/SGCA/PKP2/ITGA2B/ITGB7/ITGA2/ITGB6/TCF7L2/DSC2/ITGB8/ITGA6/SLC8A1/ATP2A2/ITGA9/DSG2/ACTN4/RYR2/CACNB3
KEGG_FRUCTOSE_AND_MANNOSE_METABOLISM	KEGG_FRUCTOSE_AND_MANNOSE_METABOLISM	31	-0.32557	-0.745062	0.879794	1	0.989703	2680	tags=19%, list=9%, signal=18%	MTMR6/FPGT/PFKFB4/KHK/ALDOB
KEGG_TASTE_TRANSDUCTION	KEGG_TASTE_TRANSDUCTION	34	0.317891	0.758844	0.8831	1	0.989703	5361	tags=26%, list=17%, signal=22%	CACNA1B/TAS2R46/TAS1R3/TAS2R42/TAS2R10/TAS2R4/TAS2R19/ADCY6/TAS2R20
KEGG_PRION_DISEASES	KEGG_PRION_DISEASES	29	-0.327442	-0.738907	0.884814	1	0.989703	3114	tags=10%, list=10%, signal=9%	CCL5/C9
KEGG_PATHOGENIC_ESCHERICHIA_COLI_INFECTION	KEGG_PATHOGENIC_ESCHERICHIA_COLI_INFECTION	53	0.301165	0.776025	0.899608	1	0.989703	6082	tags=19%, list=20%, signal=15%	TUBA8/TUBB2B/KRT18/TUBB8/TUBB1/ARPC5/TUBA1A/TUBA3E/HCLS1/NCK2
KEGG_ETHER_LIPID_METABOLISM	KEGG_ETHER_LIPID_METABOLISM	27	-0.324267	-0.721203	0.904826	1	0.989703	9413	tags=48%, list=31%, signal=33%	PLPP2/PLPP1/LPCAT2/AGPS/CHPT1/PLD2/PLA2G6/ENPP6/PLA2G2A/PLA2G4B/PLA2G1B/PLA2G12B
KEGG_NICOTINATE_AND_NICOTINAMIDE_METABOLISM	KEGG_NICOTINATE_AND_NICOTINAMIDE_METABOLISM	24	0.319089	0.712512	0.912047	1	0.989703	4855	tags=12%, list=16%, signal=11%	NMNAT3/CD38/NT5C1B
KEGG_BIOSYNTHESIS_OF_UNSATURATED_FATTY_ACIDS	KEGG_BIOSYNTHESIS_OF_UNSATURATED_FATTY_ACIDS	21	0.317512	0.688246	0.927512	1	0.989703	7092	tags=24%, list=23%, signal=18%	ACOX1/PECR/ACOT1/ACOT2/TECR
KEGG_ALPHA_LINOLENIC_ACID_METABOLISM	KEGG_ALPHA_LINOLENIC_ACID_METABOLISM	13	-0.332916	-0.640052	0.928281	1	0.989703	5630	tags=38%, list=18%, signal=31%	PLA2G2A/PLA2G4B/PLA2G1B/PLA2G12B
KEGG_NITROGEN_METABOLISM	KEGG_NITROGEN_METABOLISM	18	0.314163	0.656113	0.937461	1	0.989703	5129	tags=22%, list=17%, signal=19%	GLS2/CA14/AMT/CA13
KEGG_NOTCH_SIGNALING_PATHWAY	KEGG_NOTCH_SIGNALING_PATHWAY	43	0.291072	0.722872	0.945513	1	0.989703	5107	tags=12%, list=17%, signal=10%	DLL3/DTX1/DTX4/DVL3/RFNG
KEGG_RNA_POLYMERASE	KEGG_RNA_POLYMERASE	29	0.295521	0.685157	0.949654	1	0.989703	21858	tags=100%, list=71%, signal=29%	POLR2J2/POLR2D/POLR2E/POLR1B/POLR3F/POLR1C/POLR2H/POLR3H/POLR2J/POLR2L/POLR1A/POLR2F/POLR3B/POLR2J3/POLR2A/POLR2G/POLR2I/POLR1D/POLR3A/ZNRD1/POLR3GL/POLR3D/POLR1E/POLR2J3/POLR2C/POLR3C/POLR2B/POLR3K/POLR2K/POLR3G
KEGG_RIBOFLAVIN_METABOLISM	KEGG_RIBOFLAVIN_METABOLISM	16	0.309707	0.629323	0.954206	1	0.989703	9408	tags=44%, list=31%, signal=30%	ACP4/ACP5/ACP1/ENPP3/PHPT1/MTMR7/ACP6
KEGG_NUCLEOTIDE_EXCISION_REPAIR	KEGG_NUCLEOTIDE_EXCISION_REPAIR	44	-0.288463	-0.705599	0.956669	1	0.989703	8514	tags=43%, list=28%, signal=31%	ERCC4/RAD23B/POLE/CUL4A/XPC/POLE4/ERCC6/XPA/POLD3/RFC5/DDB2/POLD4/CDK7/RFC2/MNAT1/GTF2H2/ERCC5/RPA4
KEGG_CIRCADIAN_RHYTHM_MAMMAL	KEGG_CIRCADIAN_RHYTHM_MAMMAL	12	0.303245	0.575838	0.965902	1	0.989703	21417	tags=100%, list=70%, signal=30%	CRY2/NR1D1/NPAS2/PER2/BHLHE41/CSNK1D/BHLHE40/CRY1/CLOCK/ARNTL/PER3/CSNK1E
KEGG_VEGF_SIGNALING_PATHWAY	KEGG_VEGF_SIGNALING_PATHWAY	67	0.274785	0.735826	0.967826	1	0.989703	1639	tags=4%, list=5%, signal=4%	PIK3CG/PLA2G3/KDR
KEGG_LIMONENE_AND_PINENE_DEGRADATION	KEGG_LIMONENE_AND_PINENE_DEGRADATION	10	-0.301728	-0.546526	0.96915	1	0.989703	21464	tags=70%, list=70%, signal=21%	ECHS1/ALDH9A1/HADHA/YOD1/ALDH3A2/EHHADH
KEGG_GLYCOSAMINOGLYCAN_DEGRADATION	KEGG_GLYCOSAMINOGLYCAN_DEGRADATION	19	-0.286618	-0.598103	0.970464	1	0.989703	2503	tags=21%, list=8%, signal=19%	HS3ST3B1/HPSE/HPSE2
KEGG_PROXIMAL_TUBULE_BICARBONATE_RECLAMATION	KEGG_PROXIMAL_TUBULE_BICARBONATE_RECLAMATION	18	0.279064	0.58281	0.978256	1	0.989703	4055	tags=11%, list=13%, signal=10%	GLS2/SLC38A3
KEGG_SELENOAMINO_ACID_METABOLISM	KEGG_SELENOAMINO_ACID_METABOLISM	23	0.275691	0.610403	0.98147	1	0.989703	2161	tags=25%, list=7%, signal=23%	CBS/SCLY/CTH/AHCYL1/GGT1
KEGG_NON_HOMOLOGOUS_END_JOINING	KEGG_NON_HOMOLOGOUS_END_JOINING	12	0.264998	0.503209	0.985534	1	0.989703	22592	tags=100%, list=74%, signal=26%	RAD50/NHEJ1/XRCC4/POLL/FEN1/XRCC5/XRCC6/PRKDC/DCLRE1C/MRE11/POLM/LIG4
KEGG_BLADDER_CANCER	KEGG_BLADDER_CANCER	41	-0.264021	-0.637598	0.985698	1	0.989703	1392	tags=12%, list=5%, signal=12%	PGF/CXCL8/DAPK3/FGFR3
KEGG_TERPENOID_BACKBONE_BIOSYNTHESIS	KEGG_TERPENOID_BACKBONE_BIOSYNTHESIS	13	0.261133	0.505314	0.986747	1	0.989703	22711	tags=100%, list=74%, signal=26%	PDSS1/PDSS2/MVD/DHDDS/ACAT2/MVK/FDPS/PMVK/ACAT1/HMGCS1/GGPS1/HMGCR/IDI1
KEGG_HEMATOPOIETIC_CELL_LINEAGE	KEGG_HEMATOPOIETIC_CELL_LINEAGE	50	0.26084	0.664916	0.986748	1	0.989703	5614	tags=20%, list=18%, signal=16%	IL5/ITGA2B/CD37/IL6R/ITGA2/GP1BA/CD38/IL1R2/CSF2RA/ITGA6
KEGG_SNARE_INTERACTIONS_IN_VESICULAR_TRANSPORT	KEGG_SNARE_INTERACTIONS_IN_VESICULAR_TRANSPORT	38	0.257435	0.626017	0.989243	1	0.989703	9306	tags=32%, list=30%, signal=22%	VAMP7/YKT6/STX11/GOSR2/STX3/SNAP47/TSNARE1/USE1/STX18/STX5/STX8/VAMP1
KEGG_AXON_GUIDANCE	KEGG_AXON_GUIDANCE	124	-0.260076	-0.740549	0.99134	1	0.989703	5747	tags=11%, list=19%, signal=9%	DPYSL2/LRRC4C/PAK3/UNC5C/ROCK1/EFNB3/EPHA6/ABLIM3/PAK6/DCC/SEMA6D/NTN3/SEMA3G
KEGG_PROTEIN_EXPORT	KEGG_PROTEIN_EXPORT	24	-0.255136	-0.554871	0.992506	1	0.989703	8026	tags=33%, list=26%, signal=25%	SPCS3/SRPRB/SEC61G/SRP68/IMMP2L/SRP9P1/SRP9
KEGG_COLORECTAL_CANCER	KEGG_COLORECTAL_CANCER	61	0.252658	0.666034	0.993731	1	0.989703	428	tags=2%, list=1%, signal=2%	PIK3CG
KEGG_LONG_TERM_DEPRESSION	KEGG_LONG_TERM_DEPRESSION	59	-0.252637	-0.646772	0.994989	1	0.989703	6086	tags=15%, list=20%, signal=12%	PLA2G2A/IGF1/PLCB2/PLA2G4B/PLA2G1B/GRID2/PLA2G12B/GRIA2
KEGG_LYSINE_DEGRADATION	KEGG_LYSINE_DEGRADATION	43	0.241959	0.600901	0.995085	1	0.989703	10120	tags=26%, list=33%, signal=17%	PIPOX/BBOX1/GCDH/ASH1L/SETMAR/NSD3/KMT5C/EHMT2/ALDH7A1/ACAT2/ALDH1B1
KEGG_THYROID_CANCER	KEGG_THYROID_CANCER	28	0.245155	0.563476	0.995588	1	0.989703	10599	tags=36%, list=34%, signal=23%	TCF7L2/PAX8/BRAF/PPARG/RXRB/MYC/RXRA/TP53/CDH1/CTNNB1
KEGG_ADHERENS_JUNCTION	KEGG_ADHERENS_JUNCTION	73	0.250064	0.676352	0.996077	1	0.989703	1970	tags=3%, list=6%, signal=3%	CTNNA2/PTPN6
KEGG_DORSO_VENTRAL_AXIS_FORMATION	KEGG_DORSO_VENTRAL_AXIS_FORMATION	22	-0.236892	-0.507763	0.996163	1	0.989703	4840	tags=45%, list=16%, signal=38%	SOS2/ETS1/NOTCH3/MAPK1/KRAS/MAP2K1/FMN2/NOTCH4/PIWIL2
KEGG_RIG_I_LIKE_RECEPTOR_SIGNALING_PATHWAY	KEGG_RIG_I_LIKE_RECEPTOR_SIGNALING_PATHWAY	57	0.240598	0.628316	0.997615	1	0.989703	1361	tags=4%, list=4%, signal=3%	IFNA5/IL12B
KEGG_N_GLYCAN_BIOSYNTHESIS	KEGG_N_GLYCAN_BIOSYNTHESIS	45	0.238432	0.596465	0.997631	1	0.989703	11373	tags=47%, list=37%, signal=29%	ALG11/MOGS/MGAT5/B4GALT3/MGAT1/ALG6/ALG13/ALG1/DDOST/DPM2/ALG12/B4GALT2/GANAB/DPAGT1/MGAT2/DPM3/STT3A/ALG10/RPN1/ST6GAL1/MGAT4B
KEGG_ONE_CARBON_POOL_BY_FOLATE	KEGG_ONE_CARBON_POOL_BY_FOLATE	16	0.203698	0.413913	0.997928	1	0.989703	24476	tags=100%, list=80%, signal=20%	AMT/MTHFR/SHMT1/SHMT2/MTHFD2/MTHFD2L/ATIC/GART/MTFMT/MTHFD1L/MTHFD1/FTCD/TYMS/DHFR/MTR/MTHFS
KEGG_PATHWAYS_IN_CANCER	KEGG_PATHWAYS_IN_CANCER	305	0.253233	0.809558	0.998064	1	0.989703	6875	tags=14%, list=22%, signal=11%	CTNNA2/PIK3CG/KLK3/WNT8B/FGF9/TGFA/COL4A6/ITGA2B/FZD10/WNT10A/STK4/FASLG/SPI1/ITGA2/HHIP/DVL3/RASSF5/TCF7L2/TRAF3/FAS/ZBTB16/BIRC5/CSF2RA/PAX8/PTCH2/RARB/ITGA6/AKT1/BRAF/CEBPA/WNT2/PPARG/RB1/PIK3R2/RELA/LAMB3/VEGFD/GLI2/TRAF4/SLC2A1/FGF1/NKX3-1
KEGG_CHEMOKINE_SIGNALING_PATHWAY	KEGG_CHEMOKINE_SIGNALING_PATHWAY	155	-0.247817	-0.723028	0.9982	1	0.989703	4850	tags=16%, list=16%, signal=14%	GNG7/PLCB4/CXCL8/CCR7/RAC2/ROCK1/CXCL5/GNB3/CCL13/PLCB2/GNG4/PIK3R1/ITK/ADCY1/CCL5/NFKBIB/XCR1/GNG3/CCL25/CXCL9/ADCY8/CXCL2/WAS/CCL22
KEGG_ECM_RECEPTOR_INTERACTION	KEGG_ECM_RECEPTOR_INTERACTION	82	0.242049	0.665448	0.998247	1	0.989703	6599	tags=18%, list=21%, signal=14%	GP6/COL4A6/ITGA2B/ITGB7/ITGA2/ITGB6/GP1BA/SV2C/ITGB8/ITGA6/VWF/VTN/LAMB3/CD36/ITGA9
KEGG_GLYCOSYLPHOSPHATIDYLINOSITOL_GPI_ANCHOR_BIOSYNTHESIS	KEGG_GLYCOSYLPHOSPHATIDYLINOSITOL_GPI_ANCHOR_BIOSYNTHESIS	25	0.216696	0.487707	0.998743	1	0.989703	8892	tags=28%, list=29%, signal=20%	PIGA/PIGP/PIGQ/PIGN/PIGL/PIGU/DPM2
KEGG_HOMOLOGOUS_RECOMBINATION	KEGG_HOMOLOGOUS_RECOMBINATION	28	-0.216185	-0.484915	0.999046	1	0.989703	1755	tags=32%, list=6%, signal=30%	BRCA2/XRCC2/RAD54L/NBN/POLD3/POLD4/TOP3A/RPA4
KEGG_ENDOCYTOSIS	KEGG_ENDOCYTOSIS	173	0.24631	0.746631	0.9991	1	0.989703	4724	tags=9%, list=15%, signal=7%	CHMP4C/FGFR4/IL2RB/KDR/PSD3/PRKCZ/RAB5B/HLA-G/SH3GL2/PSD4/HLA-F/RAB11FIP4/CXCR4/CHMP4A/RAB5C
KEGG_NOD_LIKE_RECEPTOR_SIGNALING_PATHWAY	KEGG_NOD_LIKE_RECEPTOR_SIGNALING_PATHWAY	57	0.231427	0.604366	0.999133	1	0.989703	6616	tags=18%, list=22%, signal=14%	IL18/NLRP3/PSTPIP1/NLRC4/MAPK11/CCL8/CCL7/RELA/CXCL1/CARD9
KEGG_GLUTATHIONE_METABOLISM	KEGG_GLUTATHIONE_METABOLISM	44	0.220331	0.549734	0.999144	1	0.989703	6148	tags=20%, list=20%, signal=16%	GSS/GCLM/IDH1/GSTA2/GSTA1/GSTO2/GGCT/GGT1
KEGG_FATTY_ACID_METABOLISM	KEGG_FATTY_ACID_METABOLISM	38	0.213492	0.519158	0.999156	1	0.989703	6587	tags=16%, list=21%, signal=12%	ACADL/ACOX1/ADH1B/GCDH/ACSL5/ACADS
KEGG_STEROID_BIOSYNTHESIS	KEGG_STEROID_BIOSYNTHESIS	16	0.187887	0.381784	0.999171	1	0.989703	7525	tags=25%, list=24%, signal=19%	CEL/TM7SF2/DHCR24/DHCR7
KEGG_ERBB_SIGNALING_PATHWAY	KEGG_ERBB_SIGNALING_PATHWAY	84	-0.23445	-0.634298	0.999816	1	0.989703	5404	tags=13%, list=18%, signal=11%	MAPK8/HBEGF/CAMK2D/PAK3/NRG2/ERBB3/PIK3R1/MAP2K7/PAK6/PLCG2

## Sheet: SDF-1+EX-4 vs SDF-1
ID	Description	setSize	enrichmentScore	NES	pvalue	p.adjust	qvalues	rank	leading_edge	core_enrichment
KEGG_PRIMARY_IMMUNODEFICIENCY	KEGG_PRIMARY_IMMUNODEFICIENCY	25	-0.716391	-1.58314	0.0115347	1	1	1958	tags=20%, list=6%, signal=19%	PTPRC/CD79A/RAG2/ZAP70
KEGG_TIGHT_JUNCTION	KEGG_TIGHT_JUNCTION	118	0.461471	1.34217	0.0234509	1	1	3584	tags=13%, list=12%, signal=11%	PRKCG/CLDN10/CLDN6/CTNNA2/LLGL2/CLDN16/CLDN3/CLDN11/CLDN18/PARD6A/CLDN1/PRKCQ/PRKCZ/MYH3/F11R
KEGG_BASAL_TRANSCRIPTION_FACTORS	KEGG_BASAL_TRANSCRIPTION_FACTORS	35	-0.615037	-1.45098	0.0358255	1	1	891	tags=9%, list=3%, signal=8%	TAF1L/GTF2A1L
KEGG_MATURITY_ONSET_DIABETES_OF_THE_YOUNG	KEGG_MATURITY_ONSET_DIABETES_OF_THE_YOUNG	13	0.75583	1.45616	0.0421872	1	1	809	tags=31%, list=3%, signal=30%	BHLHA15/PKLR/HNF4G/MAFA
KEGG_PYRUVATE_METABOLISM	KEGG_PYRUVATE_METABOLISM	38	0.563823	1.37866	0.0533279	1	1	2360	tags=11%, list=8%, signal=10%	PKLR/LDHC/LDHAL6A/ACOT12
KEGG_PHENYLALANINE_METABOLISM	KEGG_PHENYLALANINE_METABOLISM	17	-0.697603	-1.42006	0.0581463	1	1	4967	tags=35%, list=16%, signal=30%	DDC/MAOB/TAT/HPD/ALDH3B2
KEGG_TYROSINE_METABOLISM	KEGG_TYROSINE_METABOLISM	36	-0.581964	-1.37882	0.0613042	1	1	3728	tags=36%, list=12%, signal=32%	COMT/ALDH1A3/ALDH3B1/TYRP1/ALDH3A1/DDC/ADH1A/MAOB/HGD/TAT/HPD/ALDH3B2
KEGG_OLFACTORY_TRANSDUCTION	KEGG_OLFACTORY_TRANSDUCTION	74	-0.484001	-1.29541	0.0720395	1	1	3210	tags=19%, list=10%, signal=17%	OR7D2/OR1Q1/PDC/OR13A1/OR4F16/OR5K2/OR4F3/OR2AG2/OR52I1/CAMK2B/OR2A4/OR1L8/CNGB1
KEGG_COMPLEMENT_AND_COAGULATION_CASCADES	KEGG_COMPLEMENT_AND_COAGULATION_CASCADES	51	-0.527074	-1.32783	0.075905	1	1	1244	tags=12%, list=4%, signal=11%	F13A1/SERPIND1/C9/F5/KNG1
KEGG_RIBOSOME	KEGG_RIBOSOME	88	0.447839	1.2481	0.0827423	1	1	11840	tags=72%, list=39%, signal=44%	RPL3L/RPS2/RPL36A/RPL26L1/RPL7/RPL36/RPS27/RPS29/RPS3/RPL8/RPL39/RPS15A/RPS11/RPL32/RPL41/RPL17/RPL37/RPL35/RPL23A/RPL27/RPL34/RPL18A/RPL4/RPL12/RPLP0/RPS28/RPS20/RPS9/RPL38/RPL13/RPL28/RPS18/RPS4Y1/RPL9/RPS7/RPL26/RPL10A/RPS27A/RPL27A/RPL10/RPL22/RPS12/RPSA/MRPL13/RPS23/RSL24D1/RPS4X/RPL37A/RPS25/RPLP1/RPL6/RPL13A/RPL30/RPS27L/RPL19/RPL24/RPS3A/RPL18/RPS17/RPS6/RPL31/RPS24/RPL14
KEGG_PRION_DISEASES	KEGG_PRION_DISEASES	27	-0.580565	-1.3011	0.116457	1	1	6688	tags=22%, list=22%, signal=17%	NOTCH1/IL6/C8G/CCL5/C9
KEGG_GLYCINE_SERINE_AND_THREONINE_METABOLISM	KEGG_GLYCINE_SERINE_AND_THREONINE_METABOLISM	28	0.560933	1.28958	0.118113	1	1	6089	tags=29%, list=20%, signal=23%	GATM/SDS/PIPOX/AOC2/PHGDH/PSAT1/AMT/CHDH
KEGG_AUTOIMMUNE_THYROID_DISEASE	KEGG_AUTOIMMUNE_THYROID_DISEASE	26	0.570612	1.28976	0.12329	1	1	6816	tags=35%, list=22%, signal=27%	HLA-DOA/CD28/IL4/TG/IFNA5/HLA-F/HLA-DPA1/TSHR/HLA-DMA
KEGG_TYPE_I_DIABETES_MELLITUS	KEGG_TYPE_I_DIABETES_MELLITUS	27	0.55871	1.27439	0.132994	1	1	593	tags=7%, list=2%, signal=7%	HLA-DOA/GAD2
KEGG_PANTOTHENATE_AND_COA_BIOSYNTHESIS	KEGG_PANTOTHENATE_AND_COA_BIOSYNTHESIS	16	-0.648235	-1.30207	0.138132	1	1	787	tags=31%, list=3%, signal=30%	PPCDC/PPCS/DPYS/UPB1
KEGG_GNRH_SIGNALING_PATHWAY	KEGG_GNRH_SIGNALING_PATHWAY	87	-0.424839	-1.16336	0.172581	1	1	10036	tags=43%, list=33%, signal=29%	MAP2K4/MAPK11/MAP2K1/PLA2G4A/MAPK1/MAP3K3/SOS2/SRC/PLCB4/MAP3K1/PLCB3/JUN/MAP2K7/MAPK14/PLA2G1B/ADCY7/MAP3K4/MAPK12/ITPR2/PLD2/EGFR/ADCY4/MAPK7/MAP2K6/PRKX/HBEGF/MAPK8/PLA2G4B/ADCY5/LHB/CACNA1D/PLA2G2A/ADCY1/GNRH2/CAMK2B/CACNA1F
KEGG_ALZHEIMERS_DISEASE	KEGG_ALZHEIMERS_DISEASE	154	-0.383728	-1.12346	0.18052	1	1	2289	tags=3%, list=7%, signal=3%	GRIN2C/GRIN2A/CACNA1F/COX8C
KEGG_DRUG_METABOLISM_OTHER_ENZYMES	KEGG_DRUG_METABOLISM_OTHER_ENZYMES	33	-0.508054	-1.18412	0.210372	1	1	787	tags=24%, list=3%, signal=24%	UGT2B11/CYP2A7/UGT2B17/UGT2B7/DPYS/CYP3A7/UPB1
KEGG_HEDGEHOG_SIGNALING_PATHWAY	KEGG_HEDGEHOG_SIGNALING_PATHWAY	48	-0.467812	-1.16736	0.211546	1	1	2466	tags=27%, list=8%, signal=25%	PTCH2/WNT9A/PRKX/WNT7B/CSNK1E/WNT16/WNT4/BMP5/CSNK1A1L/WNT8B/BMP7/DHH
KEGG_CARDIAC_MUSCLE_CONTRACTION	KEGG_CARDIAC_MUSCLE_CONTRACTION	61	-0.442388	-1.14614	0.217358	1	1	4479	tags=11%, list=15%, signal=10%	CACNA2D2/CACNG8/CACNA1D/ATP1A3/CACNA1F/COX8C
KEGG_ETHER_LIPID_METABOLISM	KEGG_ETHER_LIPID_METABOLISM	25	-0.528114	-1.16707	0.243597	1	1	4426	tags=56%, list=14%, signal=48%	PLD1/PAFAH1B1/PLA2G6/PLPP1/AGPS/LPCAT4/LPCAT2/PLA2G4A/PLA2G1B/PLD2/PLA2G4B/ENPP6/PLA2G2A
KEGG_N_GLYCAN_BIOSYNTHESIS	KEGG_N_GLYCAN_BIOSYNTHESIS	46	0.448298	1.12909	0.245632	1	1	4947	tags=11%, list=16%, signal=9%	MGAT3/ALG11/MGAT5B/ALG10/MGAT5
KEGG_INTESTINAL_IMMUNE_NETWORK_FOR_IGA_PRODUCTION	KEGG_INTESTINAL_IMMUNE_NETWORK_FOR_IGA_PRODUCTION	33	0.470694	1.1185	0.278209	1	1	6008	tags=33%, list=20%, signal=27%	HLA-DOA/TNFRSF17/ITGB7/TNFSF13B/CD28/TNFRSF13C/IL4/TNFSF13/MADCAM1/IL15RA/HLA-DPA1
KEGG_ALANINE_ASPARTATE_AND_GLUTAMATE_METABOLISM	KEGG_ALANINE_ASPARTATE_AND_GLUTAMATE_METABOLISM	26	0.497833	1.12526	0.278628	1	1	2179	tags=12%, list=7%, signal=11%	GAD2/DDO/ALDH5A1
KEGG_TRYPTOPHAN_METABOLISM	KEGG_TRYPTOPHAN_METABOLISM	33	-0.480503	-1.11991	0.280039	1	1	3728	tags=18%, list=12%, signal=16%	TDO2/DDC/MAOB/IDO2/ASMT
KEGG_GLYOXYLATE_AND_DICARBOXYLATE_METABOLISM	KEGG_GLYOXYLATE_AND_DICARBOXYLATE_METABOLISM	16	-0.572583	-1.15011	0.280545	1	1	170	tags=31%, list=1%, signal=31%	ACO1/PGP/GLYCTK/HAO1
KEGG_CELL_ADHESION_MOLECULES_CAMS	KEGG_CELL_ADHESION_MOLECULES_CAMS	110	0.370183	1.06513	0.294397	1	1	4485	tags=15%, list=15%, signal=13%	HLA-DOA/CLDN10/CNTN2/CLDN6/CADM3/CLDN16/L1CAM/CLDN3/SIGLEC1/CLDN11/CLDN18/CLDN1/ITGB7/F11R/CD28/ITGB8/ICAM2
KEGG_GAP_JUNCTION	KEGG_GAP_JUNCTION	82	0.389149	1.07378	0.298596	1	1	2960	tags=10%, list=10%, signal=9%	PRKCG/DRD2/DRD1/HTR2A/TUBA1A/TUBB2B/TUBB8/TUBA8
KEGG_GLYCOSPHINGOLIPID_BIOSYNTHESIS_GLOBO_SERIES	KEGG_GLYCOSPHINGOLIPID_BIOSYNTHESIS_GLOBO_SERIES	12	0.607325	1.14897	0.300989	1	1	456	tags=8%, list=1%, signal=8%	FUT2
KEGG_EPITHELIAL_CELL_SIGNALING_IN_HELICOBACTER_PYLORI_INFECTION	KEGG_EPITHELIAL_CELL_SIGNALING_IN_HELICOBACTER_PYLORI_INFECTION	64	-0.412284	-1.07778	0.307266	1	1	9136	tags=33%, list=30%, signal=23%	SRC/MAP3K14/ATP6V1G2/JUN/MAPK14/ATP6V1C1/MAPK12/ATP6V0C/ATP6V1E2/JAM3/EGFR/HBEGF/CSK/MAPK8/CXCL8/CXCL1/CCL5/ATP6V1B1/ATP6V0A4/PLCG2
KEGG_ONE_CARBON_POOL_BY_FOLATE	KEGG_ONE_CARBON_POOL_BY_FOLATE	17	0.543551	1.11741	0.310232	1	1	6104	tags=29%, list=20%, signal=24%	ALDH1L1/MTR/MTHFD2/AMT/FTCD
KEGG_RIBOFLAVIN_METABOLISM	KEGG_RIBOFLAVIN_METABOLISM	16	0.554458	1.12165	0.311394	1	1	5931	tags=31%, list=19%, signal=25%	ACP4/ACP5/MTMR7/ENPP3/ACP1
KEGG_ALPHA_LINOLENIC_ACID_METABOLISM	KEGG_ALPHA_LINOLENIC_ACID_METABOLISM	11	-0.618658	-1.14296	0.314358	1	1	9624	tags=64%, list=31%, signal=44%	ACOX3/ACOX1/PLA2G1B/FADS2/PLA2G4B/PLA2G2A
KEGG_GALACTOSE_METABOLISM	KEGG_GALACTOSE_METABOLISM	23	-0.510757	-1.10416	0.314625	1	1	3991	tags=26%, list=13%, signal=23%	PFKL/AKR1B1/MGAM/GCK/LCT
KEGG_PARKINSONS_DISEASE	KEGG_PARKINSONS_DISEASE	119	-0.371648	-1.05611	0.319014	1	1	1126	tags=2%, list=4%, signal=2%	COX8C
KEGG_NEUROACTIVE_LIGAND_RECEPTOR_INTERACTION	KEGG_NEUROACTIVE_LIGAND_RECEPTOR_INTERACTION	184	-0.347788	-1.04097	0.332379	1	1	4556	tags=23%, list=15%, signal=20%	P2RY2/PTGDR/CHRM4/ADRB2/HRH1/GRID1/GRM8/CHRNA10/S1PR1/F2RL3/CNR1/FPR3/LHB/GRIN3B/LPAR6/CHRNA5/GABRR1/GRID2/LPAR4/OPRD1/NPFFR2/GABRG3/GLRA3/FPR2/GRIA2/AVPR1A/TACR1/P2RY4/GRIN2C/P2RY14/CHRNA3/CHRNG/HTR6/ADCYAP1R1/GRIN2A/GZMA/GRPR/OPRK1/PRSS3/GALR2/NPY1R/ADRB1
KEGG_MISMATCH_REPAIR	KEGG_MISMATCH_REPAIR	23	0.482677	1.0661	0.359166	1	1	7663	tags=26%, list=25%, signal=20%	RPA4/RFC4/EXO1/RPA2/POLD4/RPA3
KEGG_ALLOGRAFT_REJECTION	KEGG_ALLOGRAFT_REJECTION	23	0.478305	1.05644	0.373938	1	1	6816	tags=26%, list=22%, signal=20%	HLA-DOA/CD28/IL4/HLA-F/HLA-DPA1/HLA-DMA
KEGG_PROPANOATE_METABOLISM	KEGG_PROPANOATE_METABOLISM	33	0.439906	1.04533	0.378168	1	1	1270	tags=6%, list=4%, signal=6%	LDHC/LDHAL6A
KEGG_PENTOSE_AND_GLUCURONATE_INTERCONVERSIONS	KEGG_PENTOSE_AND_GLUCURONATE_INTERCONVERSIONS	16	0.525876	1.06383	0.379062	1	1	4173	tags=25%, list=14%, signal=22%	DHDH/UGT2B10/RPEL1/XYLB
KEGG_SULFUR_METABOLISM	KEGG_SULFUR_METABOLISM	12	-0.568943	-1.07558	0.38345	1	1	8965	tags=50%, list=29%, signal=35%	CHST12/BPNT1/CHST13/SULT2B1/SUOX
KEGG_B_CELL_RECEPTOR_SIGNALING_PATHWAY	KEGG_B_CELL_RECEPTOR_SIGNALING_PATHWAY	65	-0.392352	-1.02649	0.391822	1	1	3869	tags=8%, list=13%, signal=7%	PIK3R1/BLNK/CD79A/PLCG2
KEGG_RETINOL_METABOLISM	KEGG_RETINOL_METABOLISM	37	-0.434206	-1.03331	0.393417	1	1	5028	tags=32%, list=16%, signal=27%	CYP2A7/UGT2B17/UGT2B7/DGAT2/CYP2C8/ADH1A/CYP26B1/ALDH1A1/RDH12/CYP3A7/RDH8
KEGG_LONG_TERM_DEPRESSION	KEGG_LONG_TERM_DEPRESSION	57	0.392435	1.02401	0.401609	1	1	1300	tags=5%, list=4%, signal=5%	PRKCG/IGF1/GNAO1
KEGG_FC_EPSILON_RI_SIGNALING_PATHWAY	KEGG_FC_EPSILON_RI_SIGNALING_PATHWAY	60	-0.394776	-1.02109	0.40289	1	1	10021	tags=37%, list=33%, signal=25%	MAPK11/MAP2K1/PLA2G4A/MAPK1/SOS2/MAP2K7/MAPK14/RAC2/PLA2G1B/MAPK12/PIK3CD/PIK3R3/PRKCE/MAP2K6/LCP2/MAPK8/PLA2G4B/PIK3R2/PIK3R1/PLA2G2A/PLCG2
KEGG_GRAFT_VERSUS_HOST_DISEASE	KEGG_GRAFT_VERSUS_HOST_DISEASE	20	0.485344	1.03635	0.407927	1	1	283	tags=5%, list=1%, signal=5%	HLA-DOA
KEGG_NICOTINATE_AND_NICOTINAMIDE_METABOLISM	KEGG_NICOTINATE_AND_NICOTINAMIDE_METABOLISM	24	0.460934	1.02538	0.418081	1	1	8175	tags=33%, list=27%, signal=24%	CD38/NT5C1B/QPRT/ENPP3/NMNAT3/NT5M/NADSYN1/NNMT
KEGG_BETA_ALANINE_METABOLISM	KEGG_BETA_ALANINE_METABOLISM	22	-0.479486	-1.0281	0.422078	1	1	787	tags=18%, list=3%, signal=18%	GAD1/DPYS/UPB1
KEGG_ARGININE_AND_PROLINE_METABOLISM	KEGG_ARGININE_AND_PROLINE_METABOLISM	48	-0.404654	-1.00976	0.422704	1	1	6592	tags=29%, list=22%, signal=23%	PYCR2/PYCR3/ALDH3A2/AMD1/ARG2/AGMAT/ARG1/MAOB/CKM/GLS2/NOS2/CKMT1A/CKMT1B
KEGG_PATHOGENIC_ESCHERICHIA_COLI_INFECTION	KEGG_PATHOGENIC_ESCHERICHIA_COLI_INFECTION	53	0.39012	1.0058	0.43075	1	1	4570	tags=17%, list=15%, signal=14%	TUBA1A/ARPC5/TUBB2B/TUBB8/CLDN1/TUBA8/KRT18/TUBB1/TUBA3E
KEGG_BLADDER_CANCER	KEGG_BLADDER_CANCER	41	-0.409893	-0.993786	0.452863	1	1	5693	tags=37%, list=19%, signal=30%	VEGFA/RASSF1/MAPK1/ARAF/PGF/MDM2/EGFR/RB1/DAPK3/MMP1/CXCL8/RPS6KA5/CDH1/FGFR3
KEGG_ASTHMA	KEGG_ASTHMA	15	0.502385	1.0014	0.471446	1	1	7355	tags=40%, list=24%, signal=30%	HLA-DOA/EPX/IL4/HLA-DPA1/HLA-DMA/CCL11
KEGG_AMYOTROPHIC_LATERAL_SCLEROSIS_ALS	KEGG_AMYOTROPHIC_LATERAL_SCLEROSIS_ALS	48	-0.391004	-0.975697	0.487021	1	1	8892	tags=31%, list=29%, signal=22%	DERL1/PPP3CC/MAPK14/GRIA1/MAPK12/SLC1A2/GRIN2B/MAP2K6/TNFRSF1A/DAXX/NEFL/GRIA2/GRIN2C/GRIN2A
KEGG_JAK_STAT_SIGNALING_PATHWAY	KEGG_JAK_STAT_SIGNALING_PATHWAY	114	-0.346357	-0.97875	0.492265	1	1	4147	tags=14%, list=14%, signal=12%	PIK3R2/PIK3R1/IL3RA/CISH/SOCS1/CSF2RB/IL21R/CNTF/IL13RA2/CRLF2/IFNLR1/IL9R/MPL/IL12RB1/IL22RA1
KEGG_CYSTEINE_AND_METHIONINE_METABOLISM	KEGG_CYSTEINE_AND_METHIONINE_METABOLISM	31	0.413445	0.970784	0.492822	1	1	1270	tags=10%, list=4%, signal=9%	SDS/LDHC/LDHAL6A
KEGG_GLYCOSYLPHOSPHATIDYLINOSITOL_GPI_ANCHOR_BIOSYNTHESIS	KEGG_GLYCOSYLPHOSPHATIDYLINOSITOL_GPI_ANCHOR_BIOSYNTHESIS	25	0.431012	0.966794	0.502353	1	1	9927	tags=44%, list=32%, signal=30%	GPLD1/PIGL/PIGV/PIGQ/PGAP1/PIGF/PIGS/PIGT/PIGN/PIGZ/PIGA
KEGG_LINOLEIC_ACID_METABOLISM	KEGG_LINOLEIC_ACID_METABOLISM	16	-0.480588	-0.965327	0.51751	1	1	4426	tags=31%, list=14%, signal=27%	CYP2C8/AKR1B10/PLA2G2A/CYP3A7
KEGG_HOMOLOGOUS_RECOMBINATION	KEGG_HOMOLOGOUS_RECOMBINATION	28	0.414953	0.953968	0.519415	1	1	8382	tags=32%, list=27%, signal=23%	RPA4/BLM/RPA2/POLD4/TOP3B/RAD51B/EME1/RPA3/RAD51C
KEGG_PYRIMIDINE_METABOLISM	KEGG_PYRIMIDINE_METABOLISM	95	-0.348847	-0.964939	0.523623	1	1	2431	tags=25%, list=8%, signal=23%	POLR2J3/POLR2G/POLE/NME1/UCKL1/NME3/POLR2I/RRM1/PNPT1/POLA1/UMPS/TK1/TXNRD2/NME5/TYMS/DCTD/NME6/POLE2/POLR3G/ENTPD1/CANT1/DPYS/UPB1
KEGG_MAPK_SIGNALING_PATHWAY	KEGG_MAPK_SIGNALING_PATHWAY	236	-0.316676	-0.970629	0.532803	1	1	2386	tags=6%, list=8%, signal=6%	CACNA1D/PLA2G2A/IL1R1/FGF11/MAPK8IP2/FGF17/FGF18/PTPN5/FGF22/HSPA6/RASGRP4/FGFR3/PTPN7/CACNA1F
KEGG_STEROID_BIOSYNTHESIS	KEGG_STEROID_BIOSYNTHESIS	17	0.460542	0.946767	0.540906	1	1	534	tags=6%, list=2%, signal=6%	SOAT2
KEGG_GLIOMA	KEGG_GLIOMA	62	0.360177	0.952548	0.542458	1	1	927	tags=5%, list=3%, signal=5%	PRKCG/TGFA/IGF1
KEGG_LONG_TERM_POTENTIATION	KEGG_LONG_TERM_POTENTIATION	64	-0.362523	-0.947696	0.544933	1	1	2166	tags=8%, list=7%, signal=7%	GRIA2/GRIN2C/GRIN2A/CAMK2B
KEGG_OXIDATIVE_PHOSPHORYLATION	KEGG_OXIDATIVE_PHOSPHORYLATION	124	-0.33509	-0.957802	0.548351	1	1	2224	tags=2%, list=7%, signal=2%	ATP6V0A4/COX8C
KEGG_GLYCOSPHINGOLIPID_BIOSYNTHESIS_LACTO_AND_NEOLACTO_SERIES	KEGG_GLYCOSPHINGOLIPID_BIOSYNTHESIS_LACTO_AND_NEOLACTO_SERIES	19	-0.452378	-0.943184	0.551453	1	1	3678	tags=32%, list=12%, signal=28%	B3GALT5/B3GNT4/B3GALT1/GCNT2/FUT3
KEGG_ASCORBATE_AND_ALDARATE_METABOLISM	KEGG_ASCORBATE_AND_ALDARATE_METABOLISM	13	0.491104	0.946146	0.55171	1	1	745	tags=8%, list=2%, signal=8%	UGT2B10
KEGG_RENIN_ANGIOTENSIN_SYSTEM	KEGG_RENIN_ANGIOTENSIN_SYSTEM	12	0.500822	0.947483	0.552946	1	1	7038	tags=17%, list=23%, signal=13%	AGT/ENPEP
KEGG_APOPTOSIS	KEGG_APOPTOSIS	79	-0.349181	-0.94382	0.563736	1	1	8610	tags=27%, list=28%, signal=19%	PPP3CC/PRKAR1B/PIK3CD/PIK3R3/PRKAR2A/TNFRSF10D/IL1RAP/PRKX/TNFRSF1A/EXOG/PRKAR1A/BIRC2/PIK3R2/CFLAR/PIK3R1/IL3RA/CSF2RB/XIAP/IL1R1/TNFRSF10C
KEGG_SYSTEMIC_LUPUS_ERYTHEMATOSUS	KEGG_SYSTEMIC_LUPUS_ERYTHEMATOSUS	40	-0.385007	-0.929144	0.570534	1	1	3905	tags=15%, list=13%, signal=13%	ACTN3/HLA-DMB/FCGR2A/GRIN2A/C9
KEGG_ACUTE_MYELOID_LEUKEMIA	KEGG_ACUTE_MYELOID_LEUKEMIA	56	-0.363255	-0.928215	0.581595	1	1	11100	tags=41%, list=36%, signal=26%	STAT3/GRB2/NRAS/RARA/IKBKB/MAP2K1/MAPK1/RPS6KB1/SOS2/ARAF/TCF7L2/PIK3CD/PIK3R3/TCF7/LEF1/STAT5A/JUP/CEBPA/PIK3R2/PIK3R1/SPI1/CCNA1
KEGG_HISTIDINE_METABOLISM	KEGG_HISTIDINE_METABOLISM	25	-0.412422	-0.911405	0.597849	1	1	7818	tags=40%, list=26%, signal=30%	ALDH1A3/ALDH3B1/ASPA/ALDH3A2/HNMT/ALDH3A1/DDC/MAOB/ALDH3B2
KEGG_P53_SIGNALING_PATHWAY	KEGG_P53_SIGNALING_PATHWAY	66	0.347592	0.928369	0.603797	1	1	8416	tags=29%, list=28%, signal=21%	IGF1/ADGRB1/GADD45G/SFN/CDKN1A/RRM2/CDKN2A/TP53/GADD45B/CCND3/SERPINB5/CCND2/TP53AIP1/BBC3/RCHY1/GADD45A/CDK4/CCNE2/CASP9
KEGG_PROXIMAL_TUBULE_BICARBONATE_RECLAMATION	KEGG_PROXIMAL_TUBULE_BICARBONATE_RECLAMATION	19	-0.433644	-0.904126	0.610958	1	1	3902	tags=21%, list=13%, signal=18%	GLS2/ATP1A3/CA4
KEGG_NON_SMALL_CELL_LUNG_CANCER	KEGG_NON_SMALL_CELL_LUNG_CANCER	53	0.35613	0.918164	0.613355	1	1	376	tags=4%, list=1%, signal=4%	PRKCG/TGFA
KEGG_GLYCOSPHINGOLIPID_BIOSYNTHESIS_GANGLIO_SERIES	KEGG_GLYCOSPHINGOLIPID_BIOSYNTHESIS_GANGLIO_SERIES	15	-0.454149	-0.899301	0.615115	1	1	892	tags=40%, list=3%, signal=39%	B3GALT4/ST3GAL5/ST6GALNAC5/ST3GAL2/ST8SIA5
KEGG_STEROID_HORMONE_BIOSYNTHESIS	KEGG_STEROID_HORMONE_BIOSYNTHESIS	32	-0.387936	-0.898078	0.621727	1	1	5028	tags=22%, list=16%, signal=18%	UGT2B17/UGT2B7/SULT2B1/HSD11B2/CYP17A1/CYP3A7
KEGG_NATURAL_KILLER_CELL_MEDIATED_CYTOTOXICITY	KEGG_NATURAL_KILLER_CELL_MEDIATED_CYTOTOXICITY	95	-0.332855	-0.920703	0.63212	1	1	4348	tags=9%, list=14%, signal=8%	KLRK1/PIK3R2/PIK3R1/TNFRSF10C/ITGAL/KLRC2/PLCG2/ZAP70
KEGG_PROSTATE_CANCER	KEGG_PROSTATE_CANCER	87	0.331535	0.921366	0.634466	1	1	8416	tags=25%, list=28%, signal=18%	TGFA/IGF1/CREB3L3/CREB1/BCL2/PIK3CG/CREB5/E2F2/RELA/CDKN1A/AR/TP53/CREB3L2/CREB3L4/FGFR2/BRAF/CHUK/EGF/ATF4/E2F1/CCNE2/CASP9
KEGG_METABOLISM_OF_XENOBIOTICS_BY_CYTOCHROME_P450	KEGG_METABOLISM_OF_XENOBIOTICS_BY_CYTOCHROME_P450	44	0.358906	0.896341	0.647688	1	1	978	tags=9%, list=3%, signal=9%	DHDH/UGT2B10/CYP2C9/CYP2S1
KEGG_GLYCOSAMINOGLYCAN_DEGRADATION	KEGG_GLYCOSAMINOGLYCAN_DEGRADATION	19	0.411816	0.867939	0.657026	1	1	5732	tags=26%, list=19%, signal=21%	HYAL1/IDS/HYAL2/SGSH/HYAL3
KEGG_ALDOSTERONE_REGULATED_SODIUM_REABSORPTION	KEGG_ALDOSTERONE_REGULATED_SODIUM_REABSORPTION	34	0.368165	0.879638	0.669128	1	1	2345	tags=9%, list=8%, signal=8%	PRKCG/IGF1/FXYD2
KEGG_DORSO_VENTRAL_AXIS_FORMATION	KEGG_DORSO_VENTRAL_AXIS_FORMATION	22	-0.404092	-0.866438	0.669225	1	1	11932	tags=64%, list=39%, signal=39%	NOTCH2/GRB2/FMN2/MAP2K1/SPIRE2/ETS1/MAPK1/ETS2/SOS2/EGFR/NOTCH1/NOTCH4/PIWIL2
KEGG_VASOPRESSIN_REGULATED_WATER_REABSORPTION	KEGG_VASOPRESSIN_REGULATED_WATER_REABSORPTION	39	0.35833	0.878801	0.675764	1	1	6879	tags=23%, list=22%, signal=18%	RAB5B/CREB3L3/CREB1/RAB5C/AQP3/CREB5/RAB5A/CREB3L2/CREB3L4
KEGG_GLYCOSAMINOGLYCAN_BIOSYNTHESIS_KERATAN_SULFATE	KEGG_GLYCOSAMINOGLYCAN_BIOSYNTHESIS_KERATAN_SULFATE	14	0.433681	0.850412	0.679861	1	1	9605	tags=43%, list=31%, signal=29%	B3GNT7/B4GALT3/CHST6/ST3GAL3/B4GALT2/B4GALT4
KEGG_LEUKOCYTE_TRANSENDOTHELIAL_MIGRATION	KEGG_LEUKOCYTE_TRANSENDOTHELIAL_MIGRATION	104	0.317914	0.908185	0.686682	1	1	2949	tags=9%, list=10%, signal=8%	PRKCG/CLDN10/CLDN6/CTNNA2/CLDN16/CLDN3/CLDN11/CLDN18/CLDN1
KEGG_ECM_RECEPTOR_INTERACTION	KEGG_ECM_RECEPTOR_INTERACTION	80	-0.328674	-0.89031	0.691729	1	1	5097	tags=11%, list=17%, signal=9%	ITGA2B/COL11A2/COL2A1/TNXB/RELN/LAMB4/GP5/COL6A6
KEGG_VIRAL_MYOCARDITIS	KEGG_VIRAL_MYOCARDITIS	56	0.337848	0.880534	0.699774	1	1	4223	tags=7%, list=14%, signal=6%	HLA-DOA/SGCA/MYH3/CD28
KEGG_TYPE_II_DIABETES_MELLITUS	KEGG_TYPE_II_DIABETES_MELLITUS	39	0.35279	0.865214	0.703462	1	1	4672	tags=13%, list=15%, signal=11%	PKLR/MAFA/PRKCZ/ADIPOQ/PIK3CG
KEGG_BASE_EXCISION_REPAIR	KEGG_BASE_EXCISION_REPAIR	34	-0.361228	-0.846737	0.720694	1	1	10219	tags=44%, list=33%, signal=29%	MBD4/UNG/APEX2/PARP1/POLE/APEX1/HMGB1/FEN1/LIG1/TDG/MUTYH/POLE2/OGG1/HMGB1P1
KEGG_DILATED_CARDIOMYOPATHY	KEGG_DILATED_CARDIOMYOPATHY	75	-0.327159	-0.876998	0.726721	1	1	4903	tags=12%, list=16%, signal=10%	CACNA2D2/ADCY5/PLN/CACNG8/CACNA1D/ADCY1/CACNA1F/ADRB1
KEGG_GLYCOSAMINOGLYCAN_BIOSYNTHESIS_CHONDROITIN_SULFATE	KEGG_GLYCOSAMINOGLYCAN_BIOSYNTHESIS_CHONDROITIN_SULFATE	22	0.378956	0.827898	0.731707	1	1	721	tags=5%, list=2%, signal=4%	B3GAT1
KEGG_VIBRIO_CHOLERAE_INFECTION	KEGG_VIBRIO_CHOLERAE_INFECTION	50	-0.337807	-0.849591	0.739375	1	1	2224	tags=8%, list=7%, signal=7%	ATP6V1B1/ATP6V0A4/PLCG2
KEGG_CALCIUM_SIGNALING_PATHWAY	KEGG_CALCIUM_SIGNALING_PATHWAY	152	-0.30776	-0.899189	0.73965	1	1	2289	tags=11%, list=7%, signal=10%	PDE1B/ERBB3/ADCY1/AVPR1A/TACR1/NOS2/GRIN2C/HTR6/GRIN2A/CAMK2B/GRPR/PLCG2/MYLK2/CACNA1F/ADRB1
KEGG_GLYCOLYSIS_GLUCONEOGENESIS	KEGG_GLYCOLYSIS_GLUCONEOGENESIS	54	0.326648	0.844381	0.778604	1	1	1270	tags=6%, list=4%, signal=5%	PKLR/LDHC/LDHAL6A
KEGG_ENDOCYTOSIS	KEGG_ENDOCYTOSIS	173	-0.299567	-0.889741	0.783216	1	1	2223	tags=5%, list=7%, signal=4%	IQSEC3/EPN3/HSPA6/ARAP2/GRK7/FGFR3/ADRB1
KEGG_VASCULAR_SMOOTH_MUSCLE_CONTRACTION	KEGG_VASCULAR_SMOOTH_MUSCLE_CONTRACTION	99	-0.310853	-0.863462	0.785313	1	1	4470	tags=11%, list=15%, signal=10%	PLA2G4B/ADCY5/RAMP2/MYLK3/CACNA1D/PLA2G2A/ADCY1/AVPR1A/MYLK2/CACNA1F
KEGG_GLYCOSAMINOGLYCAN_BIOSYNTHESIS_HEPARAN_SULFATE	KEGG_GLYCOSAMINOGLYCAN_BIOSYNTHESIS_HEPARAN_SULFATE	25	-0.358813	-0.792935	0.789638	1	1	4274	tags=16%, list=14%, signal=14%	HS3ST5/HS3ST2/B3GAT2
KEGG_NITROGEN_METABOLISM	KEGG_NITROGEN_METABOLISM	18	-0.376802	-0.776634	0.799882	1	1	3902	tags=17%, list=13%, signal=15%	GLS2/CA4
KEGG_STARCH_AND_SUCROSE_METABOLISM	KEGG_STARCH_AND_SUCROSE_METABOLISM	33	0.337055	0.800933	0.813164	1	1	2055	tags=6%, list=7%, signal=6%	UGT2B10/PYGM
KEGG_DRUG_METABOLISM_CYTOCHROME_P450	KEGG_DRUG_METABOLISM_CYTOCHROME_P450	48	-0.324055	-0.808635	0.817513	1	1	5028	tags=23%, list=16%, signal=19%	ALDH3A1/CYP2A7/UGT2B17/UGT2B7/CYP2C8/ADH1A/MAOB/GSTA2/CYP3A7/ALDH3B2
KEGG_PORPHYRIN_AND_CHLOROPHYLL_METABOLISM	KEGG_PORPHYRIN_AND_CHLOROPHYLL_METABOLISM	27	0.33935	0.77404	0.846029	1	1	745	tags=4%, list=2%, signal=4%	UGT2B10
KEGG_ARACHIDONIC_ACID_METABOLISM	KEGG_ARACHIDONIC_ACID_METABOLISM	38	-0.325619	-0.77786	0.855374	1	1	6433	tags=23%, list=21%, signal=18%	PTGES/TBXAS1/PLA2G4B/CYP2C8/EPHX2/GGT1/PLA2G2A/GPX2
KEGG_TASTE_TRANSDUCTION	KEGG_TASTE_TRANSDUCTION	34	-0.327574	-0.76785	0.856251	1	1	4476	tags=32%, list=15%, signal=28%	PRKX/TAS2R10/GNG13/TAS2R4/TAS2R31/SCNN1A/GNG3/TAS2R50/TAS1R1/TAS2R13
KEGG_CYTOSOLIC_DNA_SENSING_PATHWAY	KEGG_CYTOSOLIC_DNA_SENSING_PATHWAY	39	0.320436	0.785864	0.861507	1	1	5751	tags=15%, list=19%, signal=13%	IL18/IL33/CXCL10/IFNA5/CCL4L2/RELA
KEGG_CIRCADIAN_RHYTHM_MAMMAL	KEGG_CIRCADIAN_RHYTHM_MAMMAL	12	-0.360515	-0.681551	0.889277	1	1	10511	tags=42%, list=34%, signal=27%	CSNK1D/CLOCK/BHLHE40/CSNK1E
KEGG_SMALL_CELL_LUNG_CANCER	KEGG_SMALL_CELL_LUNG_CANCER	83	-0.296348	-0.806042	0.890161	1	1	7926	tags=22%, list=26%, signal=16%	PIK3CD/PIK3R3/CDKN1B/LAMA5/TRAF6/ITGB1/PTGS2/CDK2/RB1/LAMC3/BIRC2/ITGA2B/PIK3R2/PIK3R1/XIAP/NOS2/LAMB4
KEGG_FC_GAMMA_R_MEDIATED_PHAGOCYTOSIS	KEGG_FC_GAMMA_R_MEDIATED_PHAGOCYTOSIS	88	-0.293427	-0.80451	0.893251	1	1	1774	tags=8%, list=6%, signal=8%	PIK3R2/PIK3R1/PTPRC/FCGR2A/PLA2G4F/PLCG2
KEGG_BUTANOATE_METABOLISM	KEGG_BUTANOATE_METABOLISM	30	0.317303	0.7388	0.908103	1	1	2179	tags=7%, list=7%, signal=6%	GAD2/ALDH5A1
KEGG_O_GLYCAN_BIOSYNTHESIS	KEGG_O_GLYCAN_BIOSYNTHESIS	27	0.318307	0.726041	0.908758	1	1	5781	tags=26%, list=19%, signal=21%	GALNT17/GALNT9/GCNT1/GALNTL6/C1GALT1C1/GALNT1/GALNT14
KEGG_REGULATION_OF_ACTIN_CYTOSKELETON	KEGG_REGULATION_OF_ACTIN_CYTOSKELETON	194	-0.280488	-0.84389	0.916369	1	1	6751	tags=15%, list=22%, signal=12%	CD14/FGF2/TIAM1/CSK/IQGAP2/MYLPF/PFN2/WAS/ARHGAP35/ROCK1/APC2/BDKRB1/ITGA2B/BDKRB2/APC/CHRM4/PIK3R2/PIK3R1/ACTN3/MYLK3/FGF11/ITGAL/FGF17/FGF18/FGF22/PAK6/FGFR3/MYLK2
KEGG_OTHER_GLYCAN_DEGRADATION	KEGG_OTHER_GLYCAN_DEGRADATION	15	0.327218	0.652241	0.927075	1	1	10902	tags=53%, list=36%, signal=34%	NEU1/GLB1/GBA/FUCA1/HEXB/HEXA/AGA/MANBA
KEGG_NOTCH_SIGNALING_PATHWAY	KEGG_NOTCH_SIGNALING_PATHWAY	42	0.290731	0.720724	0.951424	1	1	3976	tags=7%, list=13%, signal=6%	DTX4/DTX1/RFNG
KEGG_PPAR_SIGNALING_PATHWAY	KEGG_PPAR_SIGNALING_PATHWAY	55	0.28507	0.739419	0.952263	1	1	5825	tags=15%, list=19%, signal=12%	ACADL/PPARA/SLC27A2/FABP6/ADIPOQ/LPL/RXRB/ACSL5
KEGG_PANCREATIC_CANCER	KEGG_PANCREATIC_CANCER	69	0.280278	0.754684	0.954831	1	1	9355	tags=26%, list=31%, signal=18%	TGFA/PIK3CG/E2F2/RELA/CDKN2A/TP53/VEGFD/MAPK10/BRAF/CHUK/EGF/E2F1/CDK4/CASP9/RAC3/AKT2/MAPK3/CDC42
KEGG_HEMATOPOIETIC_CELL_LINEAGE	KEGG_HEMATOPOIETIC_CELL_LINEAGE	50	-0.285454	-0.717924	0.955172	1	1	5409	tags=18%, list=18%, signal=15%	IL6/CD34/ITGA2B/CD7/IL3RA/IL1R1/IL9R/GP5
KEGG_PROGESTERONE_MEDIATED_OOCYTE_MATURATION	KEGG_PROGESTERONE_MEDIATED_OOCYTE_MATURATION	82	-0.27792	-0.754056	0.958868	1	1	10248	tags=41%, list=33%, signal=28%	BUB1/CDC25B/ANAPC1/CCNB3/CDK1/MAPK11/CCNA2/MAP2K1/FZR1/MAPK1/ARAF/MAPK14/PGR/CCNB2/ANAPC4/PLK1/ADCY7/CDC25C/MAPK12/PIK3CD/PIK3R3/ADCY4/CDK2/PRKX/MAPK8/ANAPC13/RPS6KA1/SPDYA/ADCY5/PIK3R2/PIK3R1/ADCY1/CCNA1
KEGG_ANTIGEN_PROCESSING_AND_PRESENTATION	KEGG_ANTIGEN_PROCESSING_AND_PRESENTATION	53	-0.284148	-0.720476	0.960777	1	1	4348	tags=9%, list=14%, signal=8%	HSPA2/HLA-DMB/HSPA6/KLRC2
KEGG_LIMONENE_AND_PINENE_DEGRADATION	KEGG_LIMONENE_AND_PINENE_DEGRADATION	10	-0.304123	-0.553252	0.962898	1	1	21293	tags=50%, list=70%, signal=15%	ECHS1/YOD1/HADHA/ALDH3A2
KEGG_DNA_REPLICATION	KEGG_DNA_REPLICATION	36	0.283644	0.68609	0.964139	1	1	1219	tags=3%, list=4%, signal=3%	RPA4
KEGG_INOSITOL_PHOSPHATE_METABOLISM	KEGG_INOSITOL_PHOSPHATE_METABOLISM	52	-0.28076	-0.709183	0.964662	1	1	9610	tags=31%, list=31%, signal=21%	IMPA1/SYNJ2/PLCB4/PLCB3/ITPKB/PIK3CD/INPP4B/PI4KB/INPP5E/TPI1/INPPL1/ITPK1/SYNJ1/INPP5J/PLCG2
KEGG_ERBB_SIGNALING_PATHWAY	KEGG_ERBB_SIGNALING_PATHWAY	85	-0.274059	-0.748909	0.965479	1	1	3869	tags=7%, list=13%, signal=6%	PIK3R1/ERBB3/PAK6/CAMK2B/PLCG2
KEGG_BIOSYNTHESIS_OF_UNSATURATED_FATTY_ACIDS	KEGG_BIOSYNTHESIS_OF_UNSATURATED_FATTY_ACIDS	21	0.29001	0.626761	0.96731	1	1	8031	tags=29%, list=26%, signal=21%	ACOT2/ACOT4/PECR/TECR/HACD1/ELOVL2
KEGG_NOD_LIKE_RECEPTOR_SIGNALING_PATHWAY	KEGG_NOD_LIKE_RECEPTOR_SIGNALING_PATHWAY	57	-0.279956	-0.718264	0.967986	1	1	7250	tags=28%, list=24%, signal=21%	TRAF6/NFKBIB/CARD6/ERBIN/MAPK8/BIRC2/IL6/CCL7/NOD2/CXCL8/CXCL1/CXCL2/CCL8/XIAP/CCL5
KEGG_THYROID_CANCER	KEGG_THYROID_CANCER	28	-0.286676	-0.645877	0.969309	1	1	11100	tags=61%, list=36%, signal=39%	HRAS/TFG/KRAS/CCND1/PPARG/NRAS/NCOA4/CTNNB1/MAP2K1/MAPK1/TCF7L2/TPM3/TCF7/RET/LEF1/CDH1
KEGG_CYTOKINE_CYTOKINE_RECEPTOR_INTERACTION	KEGG_CYTOKINE_CYTOKINE_RECEPTOR_INTERACTION	185	0.266024	0.813775	0.976282	1	1	6017	tags=22%, list=20%, signal=17%	PF4/TNFRSF6B/LTB/IL18/TNFRSF8/XCR1/TNFRSF17/CNTFR/IL26/XCL1/KDR/CSF2RA/CXCL3/TNFRSF18/INHBE/CXCL10/IL2RB/PF4V1/CCL24/TNFSF13B/IL6R/TNFRSF13C/AMH/IL4/TNFRSF25/IL20/TNFSF13/TNFSF15/BMPR1B/CXCL11/IFNA5/CTF1/IL18RAP/CCL4L2/TNFSF12/KIT/IL15RA/IL7/TNFRSF12A/GHR
KEGG_FRUCTOSE_AND_MANNOSE_METABOLISM	KEGG_FRUCTOSE_AND_MANNOSE_METABOLISM	31	-0.279933	-0.644522	0.97659	1	1	11490	tags=48%, list=38%, signal=30%	PFKFB2/MTMR6/HK2/PFKFB3/MTMR2/GMDS/PHPT1/HK1/PFKL/TPI1/AKR1B1/PFKFB4/AKR1B10/KHK
KEGG_PEROXISOME	KEGG_PEROXISOME	75	-0.270043	-0.723891	0.977432	1	1	1829	tags=5%, list=6%, signal=5%	NOS2/ABCD2/HAO1
KEGG_MELANOMA	KEGG_MELANOMA	64	0.270241	0.717318	0.977787	1	1	927	tags=3%, list=3%, signal=3%	FGF9/IGF1
KEGG_TGF_BETA_SIGNALING_PATHWAY	KEGG_TGF_BETA_SIGNALING_PATHWAY	80	-0.26692	-0.723033	0.980827	1	1	2466	tags=8%, list=8%, signal=7%	ACVR2B/BMP5/NODAL/INHBC/BMP7
KEGG_T_CELL_RECEPTOR_SIGNALING_PATHWAY	KEGG_T_CELL_RECEPTOR_SIGNALING_PATHWAY	88	-0.264196	-0.724365	0.981866	1	1	1774	tags=6%, list=6%, signal=5%	PIK3R1/PTPRC/PAK6/ZAP70
KEGG_AMINOACYL_TRNA_BIOSYNTHESIS	KEGG_AMINOACYL_TRNA_BIOSYNTHESIS	22	0.268326	0.586208	0.982317	1	1	22390	tags=100%, list=73%, signal=27%	EARS2/NARS2/SARS2/MTFMT/WARS2/FARSA/TARS2/SEPSECS/MARS2/RARS2/FARS2/CARS2/FARSB/HARS2/PSTK/AARS2/IARS2/DARS2/YARS2/PARS2/VARS2/LARS2
KEGG_LEISHMANIA_INFECTION	KEGG_LEISHMANIA_INFECTION	54	-0.264121	-0.671901	0.985659	1	1	4147	tags=9%, list=14%, signal=8%	HLA-DMB/NOS2/FCGR2A/NCF2
KEGG_REGULATION_OF_AUTOPHAGY	KEGG_REGULATION_OF_AUTOPHAGY	20	0.264835	0.565498	0.986179	1	1	11790	tags=45%, list=39%, signal=28%	IFNA5/GABARAPL1/ATG4B/PRKAA2/ATG3/ATG5/GABARAPL2/GABARAP/ATG7
KEGG_TERPENOID_BACKBONE_BIOSYNTHESIS	KEGG_TERPENOID_BACKBONE_BIOSYNTHESIS	13	-0.264192	-0.506942	0.986716	1	1	22515	tags=100%, list=74%, signal=26%	PMVK/MVD/IDI1/DHDDS/FDPS/MVK/ACAT1/HMGCR/ACAT2/PDSS2/HMGCS1/PDSS1
KEGG_RNA_DEGRADATION	KEGG_RNA_DEGRADATION	58	-0.257589	-0.663305	0.990907	1	1	1004	tags=41%, list=3%, signal=40%	WDR61/TTC37/PAPOLG/EDC4/MTREX/XRN1/SKIV2L/CNOT1/LSM6/CNOT6/XRN2/HSPD1/ENO3/MPHOSPH6/ENO2/CNOT6L/PNPT1/CNOT4/CNOT9/TENT4A/EXOSC2/CNOT8/PAPOLB
KEGG_SELENOAMINO_ACID_METABOLISM	KEGG_SELENOAMINO_ACID_METABOLISM	23	0.247498	0.546652	0.991299	1	1	8673	tags=25%, list=28%, signal=18%	SEPHS1/SCLY/HEMK1/AHCYL2/GGT1
KEGG_PROTEASOME	KEGG_PROTEASOME	44	0.254084	0.634555	0.993422	1	1	22831	tags=100%, list=75%, signal=25%	PSMA6/PSMB9/PSME1/PSMD8/PSMB7/PSMC3/PSMB8/PSMF1/SEM1/PSME4/PSMC1P4/PSMA5/PSMB3/PSMB2/PSMC1/PSMD1/PSMC2/POMP/PSMA3/PSME3/PSMD13/PSMD4/PSMB4/PSMA8/PSMB11/PSMD12/PSMD7/PSMB6/PSMC5/PSMB5/PSMB10/PSMB1/PSME2/PSMA1/PSMA2/PSMC4/PSMD6/PSMA7/PSMC6/PSMD14/PSMD2/PSMD3/PSMA4/PSMD11
KEGG_NEUROTROPHIN_SIGNALING_PATHWAY	KEGG_NEUROTROPHIN_SIGNALING_PATHWAY	120	-0.256741	-0.730475	0.993671	1	1	9170	tags=30%, list=30%, signal=21%	MAPK11/MAP2K1/ABL1/MAPK1/MAP3K3/YWHAZ/SOS2/SHC4/MAP3K1/JUN/MAP2K7/MAPK14/PRDM4/ARHGDIB/MAPK12/PIK3CD/SH2B3/PIK3R3/TRAF6/YWHAE/RAP1A/SORT1/NFKBIB/MAPK7/SHC3/CSK/MAPK8/CAMK4/RPS6KA1/RPS6KA5/PIK3R2/FRS2/PIK3R1/CAMK2B/PLCG2
KEGG_AXON_GUIDANCE	KEGG_AXON_GUIDANCE	124	0.256009	0.747565	0.994353	1	1	6411	tags=15%, list=21%, signal=12%	SLIT1/RND1/L1CAM/ABLIM2/EFNA3/EPHA6/UNC5D/UNC5C/ROBO2/SRGAP1/EPHA1/DPYSL5/DPYSL2/EFNA1/SEMA3F/NCK2/ROBO1/ABLIM1
KEGG_SPLICEOSOME	KEGG_SPLICEOSOME	126	-0.255249	-0.730559	0.994642	1	1	13323	tags=52%, list=44%, signal=30%	SLU7/SNRNP200/HSPA8/U2AF2/THOC1/SYF2/SF3B2/SF3A2/SNW1/PRPF8/SF3B1/LSM8/HNRNPK/WBP11/CDC40/CDC5L/SNRNP70/SRSF10/PRPF38B/DDX5/SNRPB2/SF3A1/SNRPA/USP39/DDX46/SRSF6/HNRNPC/THOC2/HNRNPA3/DHX8/SRSF8/LSM6/AQR/SF3B3/SNRNP27/RBM25/PUF60/TCERG1/SNRPG/NCBP1/SF3A3/PRPF40B/SNRPE/PLRG1/TRA2A/SNRPB/PRPF38A/PRPF4/HNRNPU/HSPA1B/PRPF3/HSPA1A/DHX16/TXNL4A/ACIN1/DDX42/RBM17/HNRNPM/PQBP1/SRSF2/THOC3/SNRPD2/HSPA2/HNRN…
KEGG_NON_HOMOLOGOUS_END_JOINING	KEGG_NON_HOMOLOGOUS_END_JOINING	12	-0.234163	-0.442683	0.996309	1	1	11504	tags=58%, list=38%, signal=36%	XRCC6/XRCC5/PRKDC/LIG4/FEN1/RAD50
KEGG_PHOSPHATIDYLINOSITOL_SIGNALING_SYSTEM	KEGG_PHOSPHATIDYLINOSITOL_SIGNALING_SYSTEM	71	0.245392	0.663208	0.996639	1	1	4672	tags=11%, list=15%, signal=10%	PRKCG/DGKB/DGKI/PIP5K1B/CALM1/PIP4K2C/DGKH/PIK3CG
KEGG_NUCLEOTIDE_EXCISION_REPAIR	KEGG_NUCLEOTIDE_EXCISION_REPAIR	44	0.241806	0.603894	0.996711	1	1	1219	tags=2%, list=4%, signal=2%	RPA4
KEGG_FATTY_ACID_METABOLISM	KEGG_FATTY_ACID_METABOLISM	38	0.240819	0.58885	0.996743	1	1	1377	tags=3%, list=5%, signal=3%	ACADL
KEGG_MTOR_SIGNALING_PATHWAY	KEGG_MTOR_SIGNALING_PATHWAY	49	0.241382	0.613512	0.997524	1	1	927	tags=2%, list=3%, signal=2%	IGF1
KEGG_BASAL_CELL_CARCINOMA	KEGG_BASAL_CELL_CARCINOMA	48	-0.233618	-0.582962	0.997675	1	1	7681	tags=27%, list=25%, signal=20%	TCF7/PTCH1/PTCH2/WNT9A/LEF1/WNT7B/APC2/WNT16/APC/WNT4/FZD9/WNT8B
KEGG_UBIQUITIN_MEDIATED_PROTEOLYSIS	KEGG_UBIQUITIN_MEDIATED_PROTEOLYSIS	133	-0.247537	-0.713089	0.997968	1	1	11973	tags=41%, list=39%, signal=25%	UBE2C/UBOX5/ITCH/UBE2A/PRKN/UBE2G2/HERC3/CDC27/CUL7/CUL4B/SOCS3/ANAPC5/UBR5/MGRN1/SMURF1/RNF7/UBE2E2/UBE2D2/UBE2D1/UBE2E3/CUL4A/PIAS2/UBE2S/HUWE1/BIRC6/ANAPC1/SYVN1/UBA7/UBE4B/FZR1/ERCC8/UBE3C/MAP3K1/FBXW7/ANAPC4/SKP2/HERC2/UBE3B/MDM2/TRAF6/AIRE/NHLRC1/CDC20/ANAPC13/UBA3/BIRC2/BRCA1/UBE2D4/VHL/UBE2QL1/UBE2NL/SOCS1/XIAP
KEGG_CITRATE_CYCLE_TCA_CYCLE	KEGG_CITRATE_CYCLE_TCA_CYCLE	28	-0.224571	-0.505954	0.998033	1	1	23730	tags=43%, list=78%, signal=10%	FH/ACLY/SDHA/SUCLA2/SUCLG1/DLD/OGDH/ACO1/IDH1/DLAT/SUCLG2P2
KEGG_VEGF_SIGNALING_PATHWAY	KEGG_VEGF_SIGNALING_PATHWAY	67	-0.240825	-0.633218	0.998082	1	1	4426	tags=7%, list=14%, signal=6%	PIK3R2/PIK3R1/PLA2G2A/PLCG2
KEGG_CELL_CYCLE	KEGG_CELL_CYCLE	122	-0.245802	-0.701451	0.99815	1	1	12108	tags=53%, list=40%, signal=32%	E2F3/WEE1/YWHAG/STAG2/CCNB1/SMC3/CDC27/CDC14A/MAD2L1/ORC1/ORC2/ANAPC5/CCND1/GSK3B/BUB3/BUB1/CDC25B/CDC7/TFDP1/CCNE1/ANAPC1/CCNB3/PRKDC/CDK1/HDAC1/CCNA2/CDKN2B/ESPL1/ABL1/RAD21/FZR1/MCM4/ATR/YWHAZ/CHEK1/MCM3/CDKN1C/CCNB2/ANAPC4/SKP2/MCM7/PLK1/CREBBP/CDC25C/DBF4/MCM5/MDM2/TTK/CDKN1B/SMC1A/YWHAE/EP300/PTTG1/ORC6/CDK2/RB1/SMC1B/MCM2/CDC20/ANAPC13/CDC6/BUB1B/CDC45/CCNA1
KEGG_TOLL_LIKE_RECEPTOR_SIGNALING_PATHWAY	KEGG_TOLL_LIKE_RECEPTOR_SIGNALING_PATHWAY	83	-0.240524	-0.654204	0.99831	1	1	8610	tags=27%, list=28%, signal=19%	JUN/MAP2K7/MAPK14/MAPK12/PIK3CD/CD40/PIK3R3/TRAF6/TLR1/MAP2K6/CD14/MAPK8/IRF3/IL6/IL12B/CXCL8/PIK3R2/PIK3R1/CCL5/CXCL9/TICAM2
KEGG_PRIMARY_BILE_ACID_BIOSYNTHESIS	KEGG_PRIMARY_BILE_ACID_BIOSYNTHESIS	12	0.209705	0.396732	0.998352	1	1	24180	tags=100%, list=79%, signal=21%	CYP7B1/CYP39A1/ACOX2/CYP27A1/CH25H/AMACR/HSD17B4/SCP2/HSD3B7/CYP46A1/SLC27A5/CYP7A1
KEGG_LYSOSOME	KEGG_LYSOSOME	119	0.24402	0.710542	0.998709	1	1	10364	tags=31%, list=34%, signal=21%	DNASE2B/HYAL1/LAMP3/NEU1/ACP5/IDS/NAPSA/ATP6V0D1/SGSH/AP1M2/SMPD1/CLN5/NAGPA/AP1S3/LAMP1/CTSH/CLTCL1/AP3S1/GGA1/CD63/AP3S2/GNPTG/AP3B2/AP4M1/GGA3/GLB1/CTNS/GBA/LGMN/ATP6V0B/SLC11A2/SUMF1/MFSD8/FUCA1/CTSK/HEXB/HEXA
KEGG_GLYCEROLIPID_METABOLISM	KEGG_GLYCEROLIPID_METABOLISM	44	0.224453	0.560555	0.998972	1	1	5437	tags=14%, list=18%, signal=11%	DGKB/DGKI/DGKH/LPL/GPAT3/LCLAT1
KEGG_GLUTATHIONE_METABOLISM	KEGG_GLUTATHIONE_METABOLISM	44	-0.225782	-0.555263	0.999027	1	1	3200	tags=13%, list=10%, signal=12%	GGCT/GSS/GSTA2/GGT1/GPX2
KEGG_HYPERTROPHIC_CARDIOMYOPATHY_HCM	KEGG_HYPERTROPHIC_CARDIOMYOPATHY_HCM	69	0.236194	0.635982	0.999164	1	1	4806	tags=10%, list=16%, signal=9%	IGF1/CACNG7/SGCA/ITGB7/ITGB8/RYR2/ITGB6
KEGG_RENAL_CELL_CARCINOMA	KEGG_RENAL_CELL_CARCINOMA	67	0.23458	0.628222	0.999373	1	1	2227	tags=3%, list=7%, signal=3%	TGFA/EGLN3
KEGG_SNARE_INTERACTIONS_IN_VESICULAR_TRANSPORT	KEGG_SNARE_INTERACTIONS_IN_VESICULAR_TRANSPORT	38	0.219847	0.53757	0.999389	1	1	6680	tags=16%, list=22%, signal=12%	VAMP7/STX11/STX16/STX3/STX17/STX1B
KEGG_AMINO_SUGAR_AND_NUCLEOTIDE_SUGAR_METABOLISM	KEGG_AMINO_SUGAR_AND_NUCLEOTIDE_SUGAR_METABOLISM	42	-0.215008	-0.523865	0.999414	1	1	8740	tags=29%, list=29%, signal=20%	GPI/HK2/GMDS/GFPT2/UGDH/HK1/NANP/AMDHD2/CHIT1/NPL/GCK
KEGG_CHEMOKINE_SIGNALING_PATHWAY	KEGG_CHEMOKINE_SIGNALING_PATHWAY	160	-0.24006	-0.706309	0.999638	1	1	6793	tags=22%, list=22%, signal=17%	CCL28/GNB3/PRKX/GNG2/CCL3L1/TIAM1/GRK4/CSK/CCR10/CXCL16/WAS/GNG13/ROCK1/CXCL6/ITK/GNG4/CCL20/CCR1/ADCY5/CCL7/CXCL8/PIK3R2/CXCL1/CXCL2/PIK3R1/GNG3/CCR7/CCL8/CCL5/CXCL9/CCL25/ADCY1/CCL22/GRK7
KEGG_ARRHYTHMOGENIC_RIGHT_VENTRICULAR_CARDIOMYOPATHY_ARVC	KEGG_ARRHYTHMOGENIC_RIGHT_VENTRICULAR_CARDIOMYOPATHY_ARVC	68	0.221778	0.595627	0.999792	1	1	4806	tags=12%, list=16%, signal=10%	CTNNA2/CACNG7/SGCA/ITGB7/ITGB8/RYR2/CTNNA3/ITGB6
KEGG_LYSINE_DEGRADATION	KEGG_LYSINE_DEGRADATION	43	0.2027	0.504458	0.999795	1	1	3117	tags=5%, list=10%, signal=4%	BBOX1/PIPOX
KEGG_GLYCEROPHOSPHOLIPID_METABOLISM	KEGG_GLYCEROPHOSPHOLIPID_METABOLISM	68	-0.211817	-0.557978	0.999808	1	1	11042	tags=47%, list=36%, signal=30%	PTDSS2/PCYT1A/AGPAT1/MBOAT7/LPCAT4/LPGAT1/LPCAT2/GPD1/LPCAT3/DGKQ/DGKZ/PLA2G4A/ETNK1/PTDSS1/DGKE/LYPLA2/MBOAT1/PLA2G1B/DGKD/PLD2/GPD1L/GPAT4/ACHE/PISD/DGKG/GPAT2/PCYT1B/PLA2G4B/GPD2/CDS1/PLA2G2A
KEGG_COLORECTAL_CANCER	KEGG_COLORECTAL_CANCER	61	-0.223599	-0.5793	0.999808	1	1	10227	tags=30%, list=33%, signal=20%	MAP2K1/MSH6/MAPK1/APPL1/ARAF/JUN/TCF7L2/RAC2/PIK3CD/PIK3R3/TCF7/MAPK8/LEF1/APC2/APC/PIK3R2/PIK3R1
KEGG_OOCYTE_MEIOSIS	KEGG_OOCYTE_MEIOSIS	105	-0.228429	-0.638642	0.999813	1	1	8550	tags=25%, list=28%, signal=18%	PGR/CCNB2/ANAPC4/PLK1/ADCY7/CDC25C/MAPK12/ITPR2/SMC1A/YWHAE/PTTG1/ADCY4/PPP2R5D/CDK2/STAG3/AURKA/SMC1B/PRKX/CDC20/ANAPC13/RPS6KA1/SPDYA/ADCY5/ADCY1/CAMK2B
KEGG_FOCAL_ADHESION	KEGG_FOCAL_ADHESION	190	-0.238761	-0.716402	0.99982	1	1	6189	tags=11%, list=20%, signal=9%	MYLPF/LAMC3/ARHGAP35/ROCK1/BIRC2/TNN/ITGA2B/COL11A2/COL2A1/TNXB/PIK3R2/PIK3R1/ACTN3/MYLK3/RELN/XIAP/PAK6/LAMB4/COL6A6/MYLK2
